# Supplementary material
Source: publisher site journal article supplement (https://www.dovepress.com/article/565342)
Supplement: Supplementary file 1 [file 565342%20Revised%20Supplementary%20Material_1.docx]

**Supplementary Material**

(1) Details of each of the three two-sample MR methods that were used

In method 1, which we considered to be the main analysis (with other methods providing important sensitivity analyses), the SNP-specific Wald ratio estimates (e.g. the ratio of log odds of Facial Aging per effect allele to change in BMI per effect allele) were combined using the inverse-variance weighted (IVW) approach. This method may be biased if any of the instrumental variables are invalid (i.e. if they influence the outcome by other pathways that are independent from the exposure of interest, known as horizontal pleiotropy) 1. Thus, we also used weighted median (method 2) and MR-Egger (method 3) to combine the SNP specific estimates 2. These methods seek to obtain an MR estimate that is robust to horizontal pleiotropy. The different assumptions of each method are described as below.

**Inverse Variance Weighted (IVW) Method**

The IVW method combines the SNP-specific Wald estimates (ratio of SNP on outcome to SNP on exposure) using the following formulas:

Where *Ek* is the mean change in exposure level per additional effect allele of SNP k and *Dk* is the mean change in outcomes (e.g. log odds of Facial Aging or levels of other Facial Aging risk factors) per additional effect allele of SNP k with standard error *σDk*. The results using IVW were also used to estimate the intermediating effect of facial aging risk factors on the causal association between BMI and Facial Aging.

This method provides a consistent estimate of the causal effect if all genetic variants (SNPs) used as instrumental variables satisfy the instrumental variable (IV) assumptions, specifically, 1) the genetic variants are predictive of the exposure, 2) the genetic variants are independent of any confounding factors of the exposure-outcome association, and 3) the genetic variants are independent of the outcome given the exposure and confounding factors (exclusion restriction criteria). It does not test for or take account of horizontal pleiotropy, which if present would result in violation of the exclusion restriction criteria assumption and could importantly bias the estimate of causal effect.

The IVW estimate is a statistically efficient method, but can be biased even if just one genetic variant is invalid (i.e. if just one variant has horizontal pleiotropic effects). For this reason, we used weighted median method in addition to the IVW to account for the possibility of the existence of invalid genetic IVs.

Weighted median estimator

The weighted median estimator is the median of a distribution having estimate βj as its Pj = 100(Sj − Wj /2)th percentile, where P is the percentile for the jth ordered ratio estimate, Wj is the weight given to the jth ordered ratio estimate, proportional to the inverse of the IV variance, and Sj is the sum of weights up to and including the weight of the jth ordered ratio estimates, calculated using the following equation:

Weights are standardized, so that the sum of the weights Sj is one. As with the simple median, this method assumes that no more than 50% of the genetic IVs are invalid. Additionally it assumes that no single IV contributes more than 50% of the weight. It is more statistically efficient than the simple median method.

MR-Egger regression

The MR-Egger method was developed by Bowden et al. to specifically test for horizontal pleiotropy and correct for this in MR analyses[[1]](https://paperpile.com/c/CXJUNW/x4ty). MR Egger uses a weighted linear regression of the gene–outcome coefficients θj on the gene–exposure coefficients δj : θj = β0E+ βE×δj, in which all the δj associations are orientated to be positive, and the weights in the regression are the inverse-variances of the gene–outcome associations

(2) Calculation of the proportion of mediation effect

The proportion of the effect that is mediated by any of the potential mediators was estimated using the following equation 3:

Taking into account the genetically determined mediator factors, we performed multivariable Mendelian randomization (MR) analysis to estimate the direct causal effect of BMI on facial aging, adjusting for the SNP-potential mediator effect. The indirect causal effect (mediation effect) mediated by the mediator factor was obtained through *β1 × β2*, where *β1* is the direct causal effect of BMI on facial aging, and *β2* is the causal effect of the genetically determined mediator factor on facial aging adjusted for BMI. *β3* is the effect of BMI on facial aging adjusted for the genetically determined mediator factor.

References

1. [Bowden J, Davey Smith G, Haycock PC, Burgess S. Consistent Estimation in Mendelian Randomization with Some Invalid Instruments Using a Weighted Median Estimator. Genet Epidemiol. 2016;40: 304–314.](http://paperpile.com/b/CXJUNW/x4ty)

2. [Bowden J, Davey Smith G, Burgess S. Mendelian randomization with invalid instruments: effect estimation and bias detection through Egger regression. Int J Epidemiol. 2015;44: 512–525.](http://paperpile.com/b/CXJUNW/iHV9)

3. [Varbo A, Benn M, Smith GD, Timpson NJ, Tybjaerg-Hansen A, Nordestgaard BG. Remnant cholesterol, low-density lipoprotein cholesterol, and blood pressure as mediators from obesity to ischemic heart disease. Circ Res. 2015;116: 665–673.](http://paperpile.com/b/CXJUNW/VC96)

**(1) Supplementary Table 1** References of other data sources

| Phenotype | | Source | PMID | Total or Cases/ Controls | Ancestry | References |
| --- | --- | --- | --- | --- | --- | --- |
| Cardiovascular Disease-related | Coronary Artery Disease | NA | 29212778 | 122,733/ 424,528 | European | [1] |
| Myocardial Infraction | CARDIoGRAMplusC4D | 26343387 | 43,676/128,199 | European | [2] |
| Hypertension | FinnGen | 36653562 | 55,917/ 162,837 | European | [3] |
| Systolic Blood Pressure | ICBP | 30224653 | 757,601 | European | [4] |
| Diastolic Blood Pressure |
| Immune System Disease | Ankylosing Spondylitis | FinnGen | 36653562 | 599/217,431 | European | [3] |
| Allergic Disease (Asthma, Hay Fever or Eczema) | MRC-IEU | 29083406 | 180,129/180,709 | European | [5] |
| Systemic Lupus Erythematosus | 26502338 | 5,201/9,066 | European | [6] |
| Primary Sclerosing Cholangitis | IPSCSG | 27992413 | 2,871/ 12,019 | European | [7] |
| Celiac Disease | NA | 22057235 | 12,041/ 12,228 | European | [8] |
| Nervous System Disease | Alzheimer's Disease | ADGC | 26502339 | 21,982/ 41,944 | European | [9] |
| Schizophrenia | PGC | 26502340 | 52,017/75,889 | European | [10] |
| Ischemic Stroke | MEGASTROKE | 29531354 | 34,217/406,111 | European | [11] |
| Multiple Sclerosis | IMSGC | 21833088 | 9,722/17,376 | European | [12] |
| Endocrine System Disease | Hypothyroidism | FinnGen | 26502341 | 26,342/ 59,827 | European | [13] |
| Type 2 Diabetes | DIAGRAM | 26502342 | 74,124/ 824,006 | European | [14] |
| Sex Hormone-Binding Globulin (SHBG) Levels | UK Biobank | 34226706 | 397,043 | European | [15] |
| Serum Indices | Triglycerides Level | GLGC | 26502343 | 188,577 | European | [16] |
| Total cholesterol Level | European |
| HDL cholesterol Level | European |
| LDL cholesterol Level | European |
| Fasting Glucose Level | MAGIC | 20081858 | 46,186 | European | [17] |
| Fasting Insulin Level | 38,238 | European |
| Homeostasis Model Assessment of Insulin Resistance (HOMA-IR) | 37,037 | European |
| Proinsulin Level | 21873549 | 10,701 | European | [18] |
| Glycated Hemoglobin (HbA1c) Level | NA | 144,060 | European | [19] |
| Urate Level | GUGC | 23263486 | 110,347 | European | [20] |
| C-Reactive Protein Level | MRC-IEU | 30388399 | 204,402 | European | [21] |
| Serum Albumin Level | 34594039 | 315,268 | European | [22] |
| Receptor for advanced glycosylation end products Level | 33067605 | 21,758 | European | [23] |
| Women's Health-related | Breast cancer (Female) | BCAC | 29059683 | 122,977/105,974 | European | [24] |
| Age at First Birth (Female) | NA | 34211149 | 542,901 | European | [25] |
| Age At Menarche (Female) | ReproGen | 28436984 | 252,514 | European | [26] |
| Lifestyle-related | Sleep Duration | MRC-IEU | 27494321 | 127,573 | European | [27] |
| Cigarettes smoked per day | GSCAN | 30643251 | 337,334 | European | [28] |
| Age of smoking initiation | 341,427 | European |
| Alcohol Consumption | Within family GWAS consortium | 31745073 | 83,626 | European | [29] |
| Coffee Intake | UK Biobank | 29892013 | 428,860 | European | [30] |
| Skin Disease and Tumor | Basal Cell Carcinoma | GWAS Catalog | 33549134 | 17,416/375,455 | European | [31] |
| Melanoma Skin Cancer | UK Biobank | 34662886 | 3,751/372,016 | European | [32] |
| Seborrhoeic Keratosis | FinnGen | 36653562 | 2,434/207,482 | European | [3] |
| Sicca Syndrome | FinnGen | 1,290/213,145 | European |
| Biological Aging Proxy | Telomere Length | NA | 36450978 | 472,174 | European | [33] |
| Intrinsic Epigenetic Age Acceleration | NA | 34187551 | 34,461 | European | [34] |

References

1. [van der Harst P, Verweij N. Identification of 64 Novel Genetic Loci Provides an Expanded View on the Genetic Architecture of Coronary Artery Disease. Circ Res. 2018;122: 433–443.](http://paperpile.com/b/OGq8jr/oGyn)

2. [Nikpay M, Goel A, Won H-H, Hall LM, Willenborg C, Kanoni S, et al. A comprehensive 1,000 Genomes-based genome-wide association meta-analysis of coronary artery disease. Nat Genet. 2015;47: 1121–1130.](http://paperpile.com/b/OGq8jr/lSx5)

3. [Kurki MI, Karjalainen J, Palta P, Sipilä TP, Kristiansson K, Donner KM, et al. FinnGen provides genetic insights from a well-phenotyped isolated population. Nature. 2023;613: 508–518.](http://paperpile.com/b/OGq8jr/9lQc)

4. [Evangelou E, Warren HR, Mosen-Ansorena D, Mifsud B, Pazoki R, Gao H, et al. Genetic analysis of over 1 million people identifies 535 new loci associated with blood pressure traits. Nat Genet. 2018;50: 1412–1425.](http://paperpile.com/b/OGq8jr/pYvL)

5. [Ferreira MA, Vonk JM, Baurecht H, Marenholz I, Tian C, Hoffman JD, et al. Shared genetic origin of asthma, hay fever and eczema elucidates allergic disease biology. Nat Genet. 2017;49: 1752–1757.](http://paperpile.com/b/OGq8jr/AONZ)

6. [Bentham J, Morris DL, Graham DSC, Pinder CL, Tombleson P, Behrens TW, et al. Genetic association analyses implicate aberrant regulation of innate and adaptive immunity genes in the pathogenesis of systemic lupus erythematosus. Nat Genet. 2015;47: 1457–1464.](http://paperpile.com/b/OGq8jr/bOZ2)

7. [Ji S-G, Juran BD, Mucha S, Folseraas T, Jostins L, Melum E, et al. Genome-wide association study of primary sclerosing cholangitis identifies new risk loci and quantifies the genetic relationship with inflammatory bowel disease. Nat Genet. 2017;49: 269–273.](http://paperpile.com/b/OGq8jr/koLz)

8. [Trynka G, Hunt KA, Bockett NA, Romanos J, Mistry V, Szperl A, et al. Dense genotyping identifies and localizes multiple common and rare variant association signals in celiac disease. Nat Genet. 2011;43: 1193–1201.](http://paperpile.com/b/OGq8jr/aD7Z)

9. [Maurano MT, Haugen E, Sandstrom R, Vierstra J, Shafer A, Kaul R, et al. Large-scale identification of sequence variants influencing human transcription factor occupancy in vivo. Nat Genet. 2015;47: 1393–1401.](http://paperpile.com/b/OGq8jr/h3up)

10. [Peng S, Lohse D, Zhang X. Spontaneous Pattern Formation of Surface Nanodroplets from Competitive Growth. ACS Nano. 2015;9: 11916–11923.](http://paperpile.com/b/OGq8jr/UlFc)

11. [Malik R, Chauhan G, Traylor M, Sargurupremraj M, Okada Y, Mishra A, et al. Multiancestry genome-wide association study of 520,000 subjects identifies 32 loci associated with stroke and stroke subtypes. Nat Genet. 2018;50: 524–537.](http://paperpile.com/b/OGq8jr/O4TP)

12. [International Multiple Sclerosis Genetics Consortium, Wellcome Trust Case Control Consortium 2, Sawcer S, Hellenthal G, Pirinen M, Spencer CCA, et al. Genetic risk and a primary role for cell-mediated immune mechanisms in multiple sclerosis. Nature. 2011;476: 214–219.](http://paperpile.com/b/OGq8jr/Y6BG)

13. [Zhang Y, Yamamoto T, Green MA, Kageyama H, Ueda Y. Interlayer Communication in Aurivillius Vanadate to Enable Defect Structures and Charge Ordering. Inorg Chem. 2015;54: 10925–10933.](http://paperpile.com/b/OGq8jr/6jJY)

14. [Xie X, Bakker E. Determination of Effective Stability Constants of Ion-Carrier Complexes in Ion Selective Nanospheres with Charged Solvatochromic Dyes. Anal Chem. 2015;87: 11587–11591.](http://paperpile.com/b/OGq8jr/DoU5)

15. [Barton AR, Sherman MA, Mukamel RE, Loh P-R. Whole-exome imputation within UK Biobank powers rare coding variant association and fine-mapping analyses. Nat Genet. 2021;53: 1260–1269.](http://paperpile.com/b/OGq8jr/uIKG)

16. [Prier CK, Arnold FH. Chemomimetic biocatalysis: exploiting the synthetic potential of cofactor-dependent enzymes to create new catalysts. J Am Chem Soc. 2015;137: 13992–14006.](http://paperpile.com/b/OGq8jr/VmMJ)

17. [Dupuis J, Langenberg C, Prokopenko I, Saxena R, Soranzo N, Jackson AU, et al. New genetic loci implicated in fasting glucose homeostasis and their impact on type 2 diabetes risk. Nat Genet. 2010;42: 105–116.](http://paperpile.com/b/OGq8jr/G9tj)

18. [Strawbridge RJ, Dupuis J, Prokopenko I, Barker A, Ahlqvist E, Rybin D, et al. Genome-wide association identifies nine common variants associated with fasting proinsulin levels and provides new insights into the pathophysiology of type 2 diabetes. Diabetes. 2011;60: 2624–2634.](http://paperpile.com/b/OGq8jr/62Z7)

19. [Willems SM, Ng NHJ, Fernandez J, Fine RS, Wheeler E, Wessel J, et al. Large-scale exome array summary statistics resources for glycemic traits to aid effector gene prioritization. Wellcome Open Res. 2023;8: 483.](http://paperpile.com/b/OGq8jr/R9PS)

20. [Köttgen A, Albrecht E, Teumer A, Vitart V, Krumsiek J, Hundertmark C, et al. Genome-wide association analyses identify 18 new loci associated with serum urate concentrations. Nat Genet. 2013;45: 145–154.](http://paperpile.com/b/OGq8jr/pDMF)

21. [Ligthart S, Vaez A, Võsa U, Stathopoulou MG, de Vries PS, Prins BP, et al. Genome Analyses of >200,000 Individuals Identify 58 Loci for Chronic Inflammation and Highlight Pathways that Link Inflammation and Complex Disorders. Am J Hum Genet. 2018;103: 691–706.](http://paperpile.com/b/OGq8jr/rH10)

22. [Sakaue S, Kanai M, Tanigawa Y, Karjalainen J, Kurki M, Koshiba S, et al. A cross-population atlas of genetic associations for 220 human phenotypes. Nat Genet. 2021;53: 1415–1424.](http://paperpile.com/b/OGq8jr/2DxR)

23. [Folkersen L, Gustafsson S, Wang Q, Hansen DH, Hedman ÅK, Schork A, et al. Genomic and drug target evaluation of 90 cardiovascular proteins in 30,931 individuals. Nat Metab. 2020;2: 1135–1148.](http://paperpile.com/b/OGq8jr/Mc25)

24. [Michailidou K, Lindström S, Dennis J, Beesley J, Hui S, Kar S, et al. Association analysis identifies 65 new breast cancer risk loci. Nature. 2017;551: 92–94.](http://paperpile.com/b/OGq8jr/YnoD)

25. [Mills MC, Tropf FC, Brazel DM, van Zuydam N, Vaez A, eQTLGen Consortium, et al. Identification of 371 genetic variants for age at first sex and birth linked to externalising behaviour. Nat Hum Behav. 2021;5: 1717–1730.](http://paperpile.com/b/OGq8jr/vx1S)

26. [Day FR, Thompson DJ, Helgason H, Chasman DI, Finucane H, Sulem P, et al. Genomic analyses identify hundreds of variants associated with age at menarche and support a role for puberty timing in cancer risk. Nat Genet. 2017;49: 834–841.](http://paperpile.com/b/OGq8jr/Hxfw)

27. [Jones SE, Tyrrell J, Wood AR, Beaumont RN, Ruth KS, Tuke MA, et al. Genome-Wide Association Analyses in 128,266 Individuals Identifies New Morningness and Sleep Duration Loci. PLoS Genet. 2016;12: e1006125.](http://paperpile.com/b/OGq8jr/vnxP)

28. [Liu M, Jiang Y, Wedow R, Li Y, Brazel DM, Chen F, et al. Association studies of up to 1.2 million individuals yield new insights into the genetic etiology of tobacco and alcohol use. Nat Genet. 2019;51: 237–244.](http://paperpile.com/b/OGq8jr/nkVc)

29. [Howe LJ, Lawson DJ, Davies NM, St Pourcain B, Lewis SJ, Davey Smith G, et al. Genetic evidence for assortative mating on alcohol consumption in the UK Biobank. Nat Commun. 2019;10: 5039.](http://paperpile.com/b/OGq8jr/KIQj)

30. [Loh P-R, Kichaev G, Gazal S, Schoech AP, Price AL. Mixed-model association for biobank-scale datasets. Nat Genet. 2018;50: 906–908.](http://paperpile.com/b/OGq8jr/QMKe)

31. [Adolphe C, Xue A, Fard AT, Genovesi LA, Yang J, Wainwright BJ. Genetic and functional interaction network analysis reveals global enrichment of regulatory T cell genes influencing basal cell carcinoma susceptibility. Genome Med. 2021;13: 19.](http://paperpile.com/b/OGq8jr/HrUj)

32. [Backman JD, Li AH, Marcketta A, Sun D, Mbatchou J, Kessler MD, et al. Exome sequencing and analysis of 454,787 UK Biobank participants. Nature. 2021;599: 628–634.](http://paperpile.com/b/OGq8jr/Xlo5)

33. [Kessler MD, Damask A, O’Keeffe S, Banerjee N, Li D, Watanabe K, et al. Common and rare variant associations with clonal haematopoiesis phenotypes. Nature. 2022;612: 301–309.](http://paperpile.com/b/OGq8jr/pOZP)

34. [McCartney DL, Min JL, Richmond RC, Lu AT, Sobczyk MK, Davies G, et al. Genome-wide association studies identify 137 genetic loci for DNA methylation biomarkers of aging. Genome Biol. 2021;22: 194.](http://paperpile.com/b/OGq8jr/qU3M)

**(2) Supplementary Table 2** Characteristics of the single nucleotide polymorphisms (SNP) used as instrumental variables

Characteristics of the single nucleotide polymorphisms (SNP) used as instrumental variables for Body Mass Index (kg/m2)a (Without Age/Sex Stratified)

| SNP | Effect Allele | Other Allele | Effect (BETA)b | EAFc | MAFd | Standard Error | P-Value |
| --- | --- | --- | --- | --- | --- | --- | --- |
| rs1000940 | G | A | 0.0192 | 0.225 | 0.225 | 0.0034 | 1.28E-08 |
| rs10132280 | A | C | -0.023 | 0.3333 | 0.3333 | 0.0034 | 1.14E-11 |
| rs1016287 | C | T | -0.0229 | 0.675 | 0.325 | 0.0034 | 2.25E-11 |
| rs10182181 | G | A | 0.0307 | 0.5 | 0.5 | 0.0031 | 8.78E-24 |
| rs10733682 | G | A | -0.0174 | 0.575 | 0.425 | 0.0031 | 1.83E-08 |
| rs10938397 | G | A | 0.0402 | 0.4333 | 0.4333 | 0.0031 | 3.20E-38 |
| rs10968576 | G | A | 0.0249 | 0.2917 | 0.2917 | 0.0033 | 6.61E-14 |
| rs11030104 | G | A | -0.0414 | 0.2 | 0.2 | 0.0038 | 5.56E-28 |
| rs11057405 | A | G | -0.0307 | 0.0917 | 0.0917 | 0.0055 | 2.02E-08 |
| rs11165643 | T | C | 0.0218 | 0.575 | 0.425 | 0.0031 | 2.07E-12 |
| rs1167827 | G | A | 0.0202 | 0.5417 | 0.4583 | 0.0033 | 6.33E-10 |
| rs11727676 | C | T | -0.0358 | 0.075 | 0.075 | 0.0064 | 2.55E-08 |
| rs12286929 | G | A | 0.0217 | 0.4333 | 0.4333 | 0.0031 | 1.31E-12 |
| rs12429545 | A | G | 0.0334 | 0.1 | 0.1 | 0.0047 | 1.09E-12 |
| rs12940622 | A | G | -0.0182 | 0.4583 | 0.4583 | 0.0031 | 2.49E-09 |
| rs12986742 | C | T | 0.0212 | 0.5 | 0.5 | 0.0037 | 1.01E-08 |
| rs13021737 | G | A | 0.0601 | 0.875 | 0.125 | 0.004 | 1.11E-50 |
| rs13078960 | G | T | 0.0297 | 0.1833 | 0.1833 | 0.0039 | 1.74E-14 |
| rs13107325 | T | C | 0.0477 | 0.1167 | 0.1167 | 0.0068 | 1.83E-12 |
| rs13191362 | G | A | -0.0277 | 0.2 | 0.2 | 0.0048 | 7.34E-09 |
| rs1516725 | C | T | 0.0451 | 0.9083 | 0.0917 | 0.0046 | 1.89E-22 |
| rs1528435 | T | C | 0.0178 | 0.5833 | 0.4167 | 0.0031 | 1.20E-08 |
| rs1558902 | A | T | 0.0818 | 0.45 | 0.45 | 0.0031 | 7.52E-153 |
| rs16851483 | T | G | 0.0483 | 0.0917 | 0.0917 | 0.0077 | 3.55E-10 |
| rs16951275 | C | T | -0.0311 | 0.225 | 0.225 | 0.0037 | 1.91E-17 |
| rs17001654 | G | C | 0.0306 | 0.1583 | 0.1583 | 0.0053 | 7.76E-09 |
| rs17024393 | C | T | 0.0658 | 0.04167 | 0.04167 | 0.0088 | 7.03E-14 |
| rs17066856 | C | T | -0.0395 | 0.1333 | 0.1333 | 0.0055 | 6.22E-13 |
| rs17094222 | C | T | 0.0249 | 0.2083 | 0.2083 | 0.0038 | 5.94E-11 |
| rs17405819 | C | T | -0.0224 | 0.3667 | 0.3667 | 0.0033 | 2.07E-11 |
| rs17724992 | G | A | -0.0194 | 0.3083 | 0.3083 | 0.0035 | 3.41E-08 |
| rs1808579 | T | C | -0.0167 | 0.475 | 0.475 | 0.0031 | 4.17E-08 |
| rs1928295 | C | T | -0.0188 | 0.425 | 0.425 | 0.0031 | 7.91E-10 |
| rs2033529 | G | A | 0.019 | 0.2583 | 0.2583 | 0.0033 | 1.39E-08 |
| rs2033732 | C | T | 0.0192 | 0.7583 | 0.2417 | 0.0035 | 4.89E-08 |
| rs205262 | G | A | 0.0221 | 0.2667 | 0.2667 | 0.0035 | 1.75E-10 |
| rs2112347 | G | T | -0.0261 | 0.375 | 0.375 | 0.0031 | 6.19E-17 |
| rs2121279 | T | C | 0.0245 | 0.1167 | 0.1167 | 0.0044 | 2.31E-08 |
| rs2176598 | C | T | -0.0198 | 0.8 | 0.2 | 0.0036 | 2.97E-08 |
| rs2207139 | G | A | 0.0447 | 0.1 | 0.1 | 0.004 | 4.13E-29 |
| rs2245368 | T | C | -0.0317 | 0.7583 | 0.2417 | 0.0057 | 3.19E-08 |
| rs2287019 | T | C | -0.036 | 0.15 | 0.15 | 0.0042 | 4.58E-18 |
| rs2365389 | T | C | -0.02 | 0.3417 | 0.3417 | 0.0031 | 1.63E-10 |
| rs2820292 | C | A | 0.0195 | 0.5083 | 0.4917 | 0.0031 | 1.83E-10 |
| rs29941 | G | A | 0.0182 | 0.6667 | 0.3333 | 0.0033 | 2.41E-08 |
| rs3101336 | C | T | 0.0334 | 0.6491 | 0.3509 | 0.0031 | 2.66E-26 |
| rs3736485 | G | A | -0.0176 | 0.575 | 0.425 | 0.0031 | 7.41E-09 |
| rs3817334 | T | C | 0.0262 | 0.45 | 0.45 | 0.0031 | 5.15E-17 |
| rs3849570 | A | C | 0.0188 | 0.3667 | 0.3667 | 0.0034 | 2.60E-08 |
| rs3888190 | A | C | 0.0309 | 0.3583 | 0.3583 | 0.0031 | 3.14E-23 |
| rs4256980 | G | C | 0.0209 | 0.725 | 0.275 | 0.0031 | 2.90E-11 |
| rs4740619 | C | T | -0.0179 | 0.4667 | 0.4667 | 0.0031 | 4.56E-09 |
| rs4889606 | G | A | -0.0183 | 0.3583 | 0.3583 | 0.0031 | 4.86E-09 |
| rs543874 | G | A | 0.0482 | 0.2667 | 0.2667 | 0.0039 | 2.62E-35 |
| rs6477694 | T | C | -0.0174 | 0.6417 | 0.3583 | 0.0031 | 2.67E-08 |
| rs6567160 | C | T | 0.0556 | 0.2833 | 0.2833 | 0.0036 | 3.93E-53 |
| rs657452 | G | A | -0.0227 | 0.5833 | 0.4167 | 0.0031 | 5.48E-13 |
| rs6656785 | G | A | 0.0217 | 0.3833 | 0.3833 | 0.0031 | 3.83E-12 |
| rs6804842 | G | A | 0.0185 | 0.575 | 0.425 | 0.0031 | 2.48E-09 |
| rs7138803 | A | G | 0.0315 | 0.4417 | 0.4417 | 0.0031 | 8.15E-24 |
| rs7141420 | T | C | 0.0235 | 0.6167 | 0.3833 | 0.0031 | 1.23E-14 |
| rs758747 | T | C | 0.0225 | 0.2667 | 0.2667 | 0.0037 | 7.47E-10 |
| rs7599312 | A | G | -0.022 | 0.2917 | 0.2917 | 0.0034 | 1.17E-10 |
| rs7899106 | G | A | 0.0395 | 0.05 | 0.05 | 0.0071 | 2.96E-08 |
| rs7903146 | T | C | -0.0234 | 0.25 | 0.25 | 0.0034 | 1.11E-11 |
| rs879620 | T | C | 0.0244 | 0.5917 | 0.4083 | 0.004 | 1.06E-09 |
| rs9400239 | C | T | 0.0188 | 0.7 | 0.3 | 0.0033 | 1.61E-08 |
| rs9579083 | C | G | 0.0295 | 0.2333 | 0.2333 | 0.0047 | 3.46E-10 |
| rs9926784 | C | T | -0.0265 | 0.2083 | 0.2083 | 0.0042 | 1.85E-10 |

a The variants together explain 10.9% of the variation in BMI (R2 = 0.109; F (TOTAL) = 567.630).

b Increase in body mass index (kg/m2) per effect allele

c Effect Allele Frequency

d Minor Allele Frequency

Characteristics of the single nucleotide polymorphisms (SNP) used as instrumental variables for Body Mass Index (Male, ＞ 50 years)a (kg/m2)

| SNP | Effect Allele | Other Allele | Effect (BETA)b | EAFc | MAFd | Standard Error | P-Value |
| --- | --- | --- | --- | --- | --- | --- | --- |
| rs1222069 | C | A | -0.029 | 0.38 | 0.38 | 0.0052 | 2.90E-08 |
| rs12641981 | C | T | -0.04 | 0.57 | 0.43 | 0.005 | 1.60E-15 |
| rs13107325 | C | T | -0.065 | 0.88 | 0.12 | 0.011 | 2.60E-09 |
| rs1558902 | A | T | 0.073 | 0.45 | 0.45 | 0.005 | 9.50E-49 |
| rs2245368 | T | C | -0.052 | 0.76 | 0.24 | 0.0088 | 3.20E-09 |
| rs2568958 | G | A | -0.031 | 0.35 | 0.35 | 0.005 | 3.90E-10 |
| rs2943652 | T | C | -0.031 | 0.6 | 0.4 | 0.0051 | 1.40E-09 |
| rs3888190 | A | C | 0.035 | 0.36 | 0.36 | 0.0049 | 8.40E-13 |
| rs4317857 | T | C | -0.051 | 0.075 | 0.075 | 0.009 | 1.90E-08 |
| rs4556910 | T | A | 0.036 | 0.22 | 0.22 | 0.0063 | 9.80E-09 |
| rs4923457 | A | T | 0.047 | 0.8 | 0.2 | 0.0061 | 1.10E-14 |
| rs538656 | T | G | 0.051 | 0.28 | 0.28 | 0.0063 | 6.60E-16 |
| rs6731348 | A | C | -0.053 | 0.12 | 0.12 | 0.0066 | 1.60E-15 |
| rs6809651 | A | G | -0.043 | 0.092 | 0.092 | 0.0075 | 9.30E-09 |
| rs7124681 | C | A | -0.031 | 0.55 | 0.45 | 0.005 | 4.40E-10 |
| rs7903146 | T | C | -0.037 | 0.25 | 0.25 | 0.0055 | 1.50E-11 |
| rs7928810 | A | C | 0.03 | 0.57 | 0.43 | 0.005 | 2.60E-09 |
| rs987237 | G | A | 0.045 | 0.092 | 0.092 | 0.0063 | 8.10E-13 |

a The variants together explain 0.8% of the variation in BMI (Male, ＞ 50 years) (R2 = 0.008; F (TOTAL) = 41.414).

b Increase in body mass index (Male, ＞ 50 years) (kg/m2) per effect allele

c Effect Allele Frequency

d Minor Allele Frequency

Characteristics of the single nucleotide polymorphisms (SNP) used as instrumental variables for Body Mass Index (Female, ＞ 50 years)a (kg/m2)

| SNP | Effect Allele | Other Allele | Effect (BETA)b | EAFc | MAFd | Standard Error | P-Value |
| --- | --- | --- | --- | --- | --- | --- | --- |
| rs10057967 | C | T | -0.029 | 0.36 | 0.36 | 0.0053 | 3.20E-08 |
| rs10204803 | C | T | 0.035 | 0.63 | 0.37 | 0.0052 | 1.30E-11 |
| rs10938397 | A | G | -0.032 | 0.57 | 0.43 | 0.0049 | 9.80E-11 |
| rs11169170 | C | T | -0.032 | 0.5 | 0.5 | 0.0047 | 1.20E-11 |
| rs16917237 | G | T | 0.045 | 0.8 | 0.2 | 0.0058 | 1.30E-14 |
| rs17782313 | C | T | 0.046 | 0.28 | 0.28 | 0.0056 | 1.70E-16 |
| rs185350 | C | T | -0.03 | 0.52 | 0.48 | 0.0049 | 1.50E-09 |
| rs2075650 | A | G | 0.046 | 0.86 | 0.14 | 0.007 | 5.00E-11 |
| rs4687736 | G | C | 0.033 | 0.68 | 0.32 | 0.0059 | 3.40E-08 |
| rs4776987 | A | T | -0.034 | 0.19 | 0.19 | 0.0059 | 8.60E-09 |
| rs4780830 | G | T | 0.047 | 0.86 | 0.14 | 0.0071 | 4.50E-11 |
| rs6091540 | C | T | 0.031 | 0.72 | 0.28 | 0.0053 | 7.70E-09 |
| rs633715 | C | T | 0.054 | 0.27 | 0.27 | 0.0062 | 1.90E-18 |
| rs6548237 | A | C | -0.058 | 0.13 | 0.13 | 0.0063 | 9.90E-21 |
| rs6752378 | C | A | -0.033 | 0.5 | 0.5 | 0.0047 | 3.70E-12 |
| rs7141420 | T | C | 0.032 | 0.62 | 0.38 | 0.0047 | 4.30E-12 |
| rs8097783 | A | G | -0.057 | 0.12 | 0.12 | 0.0092 | 5.60E-10 |
| rs9816226 | A | T | -0.04 | 0.15 | 0.15 | 0.0063 | 1.20E-10 |
| rs9937053 | A | G | 0.078 | 0.48 | 0.48 | 0.0048 | 4.80E-59 |

a The variants together explain 2.8% of the variation in BMI (Female, ＞ 50 years) (R2 = 0.028; F (TOTAL) = 162.518).

b Increase in body mass index (Female, ＞ 50 years) (kg/m2) per effect allele

c Effect Allele Frequency

d Minor Allele Frequency

| Characteristics of the single nucleotide polymorphisms (SNP) used as instrumental variables for Body Mass Index (Male, ＜ 50 years)a (kg/m2)   | SNP | Effect Allele | Other Allele | Effect (BETA)b | EAFc | MAFd | Standard Error | P-Value | | --- | --- | --- | --- | --- | --- | --- | --- | | rs10938397 | A | G | -0.044 | 0.57 | 0.43 | 0.0069 | 2.60E-10 | | rs1421085 | C | T | 0.1 | 0.45 | 0.45 | 0.0067 | 6.60E-53 | | rs1993709 | A | G | -0.054 | 0.15 | 0.15 | 0.0089 | 9.20E-10 | | rs2867125 | T | C | -0.072 | 0.12 | 0.12 | 0.0089 | 4.90E-16 | | rs633715 | C | T | 0.052 | 0.27 | 0.27 | 0.0088 | 2.60E-09 | | rs6567160 | C | T | 0.071 | 0.28 | 0.28 | 0.0078 | 5.90E-20 | |
| --- | --- | --- | --- | --- | --- | --- | --- | --- | --- | --- | --- | --- | --- | --- | --- | --- | --- | --- | --- | --- | --- | --- | --- | --- | --- | --- | --- | --- | --- | --- | --- | --- | --- | --- | --- | --- | --- | --- | --- | --- | --- | --- | --- | --- | --- | --- | --- | --- | --- | --- | --- | --- | --- | --- | --- | --- |

a The variants together explain 3.1% of the variation in BMI (Male, ＜ 50 years) (R2 = 0.031; F (TOTAL) = 261.292).

b Increase in body mass index (Male, ＜ 50 years) (kg/m2) per effect allele

c Effect Allele Frequency

d Minor Allele Frequency

| Characteristics of the single nucleotide polymorphisms (SNP) used as instrumental variables for Body Mass Index (Female, ＜ 50 years)a (kg/m2) |
| --- |

| SNP | Effect Allele | Other Allele | Effect (BETA)b | EAFc | MAFd | Standard Error | P-Value |
| --- | --- | --- | --- | --- | --- | --- | --- |
| rs10182181 | A | G | -0.051 | 0.5 | 0.5 | 0.0059 | 6.60E-18 |
| rs10938397 | A | G | -0.054 | 0.57 | 0.43 | 0.0061 | 6.20E-19 |
| rs11165623 | A | G | 0.033 | 0.48 | 0.48 | 0.0059 | 2.50E-08 |
| rs12042908 | A | G | 0.045 | 0.42 | 0.42 | 0.006 | 3.80E-14 |
| rs12575252 | G | C | 0.037 | 0.72 | 0.28 | 0.0062 | 1.60E-09 |
| rs12954782 | G | C | 0.072 | 0.31 | 0.31 | 0.0067 | 3.30E-27 |
| rs1379578 | G | A | -0.036 | 0.79 | 0.21 | 0.0065 | 2.60E-08 |
| rs1516725 | T | C | -0.06 | 0.092 | 0.092 | 0.0089 | 1.10E-11 |
| rs1558902 | A | T | 0.086 | 0.45 | 0.45 | 0.006 | 1.90E-47 |
| rs16903232 | T | C | 0.058 | 0.12 | 0.12 | 0.01 | 3.20E-08 |
| rs17405819 | C | T | -0.035 | 0.37 | 0.37 | 0.0064 | 4.20E-08 |
| rs2630392 | T | A | 0.032 | 0.48 | 0.48 | 0.0059 | 4.50E-08 |
| rs2867125 | T | C | -0.097 | 0.12 | 0.12 | 0.0078 | 1.50E-35 |
| rs543874 | G | A | 0.071 | 0.27 | 0.27 | 0.0074 | 1.10E-21 |
| rs6477694 | C | T | 0.036 | 0.36 | 0.36 | 0.0063 | 1.30E-08 |
| rs7138803 | G | A | -0.044 | 0.56 | 0.44 | 0.0062 | 9.40E-13 |
| rs7141420 | T | C | 0.033 | 0.62 | 0.38 | 0.0059 | 2.80E-08 |
| rs7626349 | C | T | -0.035 | 0.69 | 0.31 | 0.0064 | 3.50E-08 |
| rs9852478 | G | A | -0.045 | 0.82 | 0.18 | 0.0074 | 1.80E-09 |
| rs987237 | G | A | 0.057 | 0.092 | 0.092 | 0.0078 | 2.40E-13 |

a The variants together explain 3.9% of the variation in BMI (Female, ＜ 50 years) (R2 = 0.039; F (TOTAL) = 144.876).

b Increase in body mass index (Female, ＜ 50 years) (kg/m2) per effect allele

c Effect Allele Frequency

d Minor Allele Frequency

| Characteristics of the single nucleotide polymorphisms (SNP) used as instrumental variables for Body Mass Index (Male)a |
| --- |

| SNP | Effect Allele | Other Allele | Effect (BETA)b | EAFc | MAFd | Standard Error | P-Value |
| --- | --- | --- | --- | --- | --- | --- | --- |
| rs10132280 | A | C | -0.0289 | 0.3333 | 0.3333 | 0.0044 | 4.96E-11 |
| rs11209963 | G | A | 0.0434 | 0.822 | 0.178 | 0.0051 | 3.37E-17 |
| rs11604680 | G | A | 0.0277 | 0.3833 | 0.3833 | 0.0043 | 1.00E-10 |
| rs11676272 | G | A | 0.026 | 0.4828 | 0.4828 | 0.0045 | 5.23E-09 |
| rs1222069 | C | A | -0.0243 | 0.3833 | 0.3833 | 0.0043 | 1.05E-08 |
| rs12286929 | G | A | 0.0222 | 0.4333 | 0.4333 | 0.004 | 3.55E-08 |
| rs12429545 | A | G | 0.0348 | 0.1 | 0.1 | 0.0062 | 1.51E-08 |
| rs13107325 | T | C | 0.0525 | 0.1167 | 0.1167 | 0.0088 | 2.72E-09 |
| rs13130484 | T | C | 0.0407 | 0.4333 | 0.4333 | 0.0041 | 6.05E-23 |
| rs1421085 | C | T | 0.084 | 0.45 | 0.45 | 0.0041 | 4.11E-94 |
| rs1528435 | T | C | 0.0229 | 0.5833 | 0.4167 | 0.0042 | 4.32E-08 |
| rs16907751 | T | C | -0.0474 | 0.0417 | 0.0417 | 0.0086 | 3.89E-08 |
| rs17094222 | C | T | 0.0307 | 0.2083 | 0.2083 | 0.005 | 8.02E-10 |
| rs17109256 | A | G | 0.0355 | 0.275 | 0.275 | 0.0049 | 7.14E-13 |
| rs2176040 | G | A | -0.0239 | 0.6083 | 0.3917 | 0.0042 | 9.99E-09 |
| rs2206277 | T | C | 0.0448 | 0.0917 | 0.0917 | 0.0053 | 1.69E-17 |
| rs2287019 | T | C | -0.0386 | 0.15 | 0.15 | 0.0055 | 2.69E-12 |
| rs253414 | T | C | 0.027 | 0.6583 | 0.3417 | 0.0046 | 3.92E-09 |
| rs2820315 | T | C | 0.0253 | 0.2807 | 0.2807 | 0.0044 | 6.63E-09 |
| rs3888190 | A | C | 0.035 | 0.3583 | 0.3583 | 0.0041 | 1.32E-17 |
| rs4776970 | T | A | -0.0282 | 0.3417 | 0.3417 | 0.0042 | 1.89E-11 |
| rs492400 | T | C | -0.0238 | 0.675 | 0.325 | 0.0041 | 6.78E-09 |
| rs543874 | G | A | 0.0341 | 0.2667 | 0.2667 | 0.0051 | 2.73E-11 |
| rs6265 | T | C | -0.0466 | 0.175 | 0.175 | 0.0051 | 1.09E-19 |
| rs6567160 | C | T | 0.0546 | 0.2833 | 0.2833 | 0.0048 | 4.55E-30 |
| rs6734363 | A | G | 0.0524 | 0.875 | 0.125 | 0.0054 | 2.01E-22 |
| rs7138803 | A | G | 0.0273 | 0.4417 | 0.4417 | 0.0042 | 5.90E-11 |
| rs7599312 | A | G | -0.0256 | 0.2917 | 0.2917 | 0.0045 | 8.68E-09 |
| rs7903146 | T | C | -0.0294 | 0.25 | 0.25 | 0.0045 | 3.89E-11 |
| rs9816226 | T | A | 0.0394 | 0.85 | 0.15 | 0.0054 | 3.94E-13 |

a The variants together explain 9.5% of the variation in BMI (Male) (R2 = 0.095; F (TOTAL) = 534.876).

b Increase in body mass index (Male) (kg/m2) per effect allele

c Effect Allele Frequency

d Minor Allele Frequency

| Characteristics of the single nucleotide polymorphisms (SNP) used as instrumental variables for Body Mass Index (Female)a |
| --- |

| SNP | Effect Allele | Other Allele | Effect (BETA)b | EAFc | MAFd | Standard Error | P-Value |
| --- | --- | --- | --- | --- | --- | --- | --- |
| rs1016287 | C | T | -0.0254 | 0.675 | 0.325 | 0.0044 | 5.87E-09 |
| rs10182181 | G | A | 0.0366 | 0.5 | 0.5 | 0.0039 | 3.91E-21 |
| rs10733682 | G | A | -0.0229 | 0.575 | 0.425 | 0.0041 | 1.66E-08 |
| rs10767664 | A | T | 0.0456 | 0.7833 | 0.2167 | 0.0054 | 1.88E-17 |
| rs10938397 | G | A | 0.0404 | 0.4333 | 0.4333 | 0.0041 | 2.98E-23 |
| rs10968576 | G | A | 0.0289 | 0.2917 | 0.2917 | 0.0043 | 1.03E-11 |
| rs11165643 | T | C | 0.023 | 0.575 | 0.425 | 0.004 | 5.76E-09 |
| rs1121980 | A | G | 0.0774 | 0.475 | 0.475 | 0.0039 | 4.87E-86 |
| rs11663558 | A | G | -0.027 | 0.5 | 0.5 | 0.0046 | 4.37E-09 |
| rs12446632 | A | G | -0.0432 | 0.1333 | 0.1333 | 0.0058 | 1.45E-13 |
| rs12529728 | G | A | 0.0462 | 0.1 | 0.1 | 0.0051 | 1.76E-19 |
| rs13098327 | A | G | 0.0333 | 0.1833 | 0.1833 | 0.0049 | 1.12E-11 |
| rs1516725 | C | T | 0.0466 | 0.9083 | 0.0917 | 0.0059 | 1.91E-15 |
| rs16851483 | T | G | 0.0524 | 0.0917 | 0.0917 | 0.0096 | 4.81E-08 |
| rs17024393 | C | T | 0.0713 | 0.04167 | 0.04167 | 0.0114 | 3.53E-10 |
| rs17381664 | C | T | 0.0239 | 0.425 | 0.425 | 0.0041 | 5.31E-09 |
| rs1928295 | C | T | -0.0258 | 0.425 | 0.425 | 0.0039 | 3.42E-11 |
| rs2060604 | C | T | -0.0232 | 0.4417 | 0.4417 | 0.004 | 4.06E-09 |
| rs2112347 | G | T | -0.0298 | 0.375 | 0.375 | 0.0041 | 3.15E-13 |
| rs2303108 | C | T | 0.0278 | 0.675 | 0.325 | 0.0043 | 8.53E-11 |
| rs3127553 | A | G | -0.0259 | 0.6333 | 0.3667 | 0.0042 | 4.58E-10 |
| rs3817334 | T | C | 0.0265 | 0.45 | 0.45 | 0.004 | 2.47E-11 |
| rs4929923 | C | T | 0.0235 | 0.7167 | 0.2833 | 0.0041 | 9.05E-09 |
| rs4981693 | A | G | 0.0336 | 0.7917 | 0.2083 | 0.0054 | 4.90E-10 |
| rs543874 | G | A | 0.0603 | 0.2667 | 0.2667 | 0.005 | 9.61E-34 |
| rs6091540 | T | C | -0.0297 | 0.275 | 0.275 | 0.0044 | 2.15E-11 |
| rs6465468 | T | G | 0.0245 | 0.325 | 0.325 | 0.0045 | 4.98E-08 |
| rs6548237 | C | A | 0.0687 | 0.8667 | 0.1333 | 0.0052 | 3.55E-40 |
| rs663129 | A | G | 0.0567 | 0.2833 | 0.2833 | 0.0046 | 3.49E-34 |
| rs7138803 | A | G | 0.0348 | 0.4417 | 0.4417 | 0.0041 | 1.80E-17 |
| rs7141420 | T | C | 0.0262 | 0.6167 | 0.3833 | 0.0039 | 1.45E-11 |
| rs7239883 | A | G | -0.0231 | 0.6833 | 0.3167 | 0.0041 | 1.51E-08 |
| rs745213 | G | T | 0.0343 | 0.8417 | 0.1583 | 0.0053 | 1.31E-10 |
| rs7531118 | C | T | 0.0341 | 0.6083 | 0.3917 | 0.0041 | 3.90E-17 |
| rs8097783 | A | G | -0.0512 | 0.1167 | 0.1167 | 0.0076 | 2.19E-11 |
| rs9462027 | A | G | 0.0273 | 0.2583 | 0.2583 | 0.0044 | 4.60E-10 |
| rs9931989 | C | G | -0.0258 | 0.7083 | 0.2917 | 0.0042 | 9.47E-10 |

a The variants together explain 11.3% of the variation in BMI (Female) (R2 = 0.113; F (TOTAL) = 592.008).

b Increase in body mass index (Female) (kg/m2) per effect allele

c Effect Allele Frequency

d Minor Allele Frequency

| Characteristics of the single nucleotide polymorphisms (SNP) used as instrumental variables for Waist-to-Hip Ratio Adjusted for BMI a |
| --- |

| SNP | Effect Allele | Other Allele | Effect (BETA)b | EAFc | MAFd | Standard Error | P-Value |
| --- | --- | --- | --- | --- | --- | --- | --- |
| rs10245353 | A | C | 0.035 | 0.1833 | 0.1833 | 0.0043 | 8.40E-16 |
| rs10804591 | A | C | 0.024 | 0.85 | 0.15 | 0.0042 | 6.60E-09 |
| rs10842707 | T | C | 0.032 | 0.1667 | 0.1667 | 0.004 | 4.40E-16 |
| rs10991437 | A | C | 0.031 | 0.1 | 0.1 | 0.0054 | 1.00E-08 |
| rs11231693 | A | G | 0.041 | 0.0417 | 0.0417 | 0.0075 | 4.50E-08 |
| rs1128249 | G | T | 0.028 | 0.5583 | 0.4417 | 0.0035 | 2.00E-15 |
| rs12143789 | C | G | 0.024 | 0.1583 | 0.1583 | 0.0042 | 7.60E-09 |
| rs12608504 | A | G | 0.022 | 0.3417 | 0.3417 | 0.0036 | 8.80E-10 |
| rs12679556 | G | T | 0.027 | 0.2083 | 0.2083 | 0.004 | 2.10E-11 |
| rs1294410 | C | T | 0.031 | 0.625 | 0.375 | 0.0035 | 2.00E-18 |
| rs1385167 | G | A | 0.029 | 0.1417 | 0.1417 | 0.0049 | 1.80E-09 |
| rs1440372 | C | T | 0.024 | 0.7417 | 0.2583 | 0.0038 | 1.10E-10 |
| rs1569135 | A | G | 0.021 | 0.5333 | 0.4667 | 0.0034 | 5.60E-10 |
| rs17451107 | T | C | 0.026 | 0.625 | 0.375 | 0.0036 | 1.10E-12 |
| rs17819328 | G | T | 0.021 | 0.45 | 0.45 | 0.0035 | 2.40E-09 |
| rs1936805 | T | C | 0.042 | 0.55 | 0.45 | 0.0034 | 3.60E-35 |
| rs2071449 | A | C | 0.028 | 0.325 | 0.325 | 0.0036 | 3.00E-14 |
| rs2276824 | C | G | 0.024 | 0.4833 | 0.4833 | 0.0036 | 3.20E-11 |
| rs2294239 | A | G | 0.025 | 0.55 | 0.45 | 0.0035 | 7.20E-13 |
| rs2645294 | C | T | -0.031 | 0.4655 | 0.4655 | 0.0035 | 1.70E-19 |
| rs2820443 | C | T | -0.035 | 0.3 | 0.3 | 0.0037 | 5.30E-21 |
| rs303084 | A | G | 0.023 | 0.7833 | 0.2167 | 0.0042 | 3.90E-08 |
| rs4081724 | G | A | 0.035 | 0.85 | 0.15 | 0.0051 | 7.40E-12 |
| rs459193 | A | G | 0.026 | 0.2167 | 0.2167 | 0.0038 | 1.60E-11 |
| rs4646404 | G | A | 0.027 | 0.625 | 0.375 | 0.0039 | 1.40E-11 |
| rs4765219 | C | A | 0.028 | 0.625 | 0.375 | 0.0036 | 1.60E-15 |
| rs6090583 | A | G | 0.022 | 0.4333 | 0.4333 | 0.0034 | 6.20E-11 |
| rs6772129 | A | G | 0.035 | 0.7583 | 0.2417 | 0.0037 | 3.40E-21 |
| rs714515 | G | A | 0.027 | 0.4583 | 0.4583 | 0.0034 | 4.40E-15 |
| rs7705502 | A | G | 0.027 | 0.2917 | 0.2917 | 0.0036 | 4.70E-14 |
| rs7759742 | A | T | 0.023 | 0.525 | 0.475 | 0.0034 | 4.40E-11 |
| rs8030605 | A | G | 0.03 | 0.1583 | 0.1583 | 0.0053 | 8.80E-09 |
| rs8042543 | C | T | 0.026 | 0.85 | 0.15 | 0.0043 | 1.20E-09 |
| rs878639 | A | G | 0.021 | 0.6417 | 0.3583 | 0.0035 | 5.10E-09 |
| rs905938 | C | T | -0.025 | 0.325 | 0.325 | 0.004 | 7.30E-10 |
| rs979012 | T | C | 0.027 | 0.3583 | 0.3583 | 0.0036 | 3.30E-14 |
| rs998584 | A | C | 0.043 | 0.475 | 0.475 | 0.0038 | 1.10E-29 |
| rs9991328 | T | C | 0.018 | 0.4833 | 0.4833 | 0.0034 | 4.50E-08 |

a The variants together explain 19.1% of the variation in Waist-to-Hip Ratio Adjusted for BMI (R2 = 0.191; F (TOTAL) = 1317.905).

b Increase in Waist-to-Hip Ratio Adjusted for BMI per effect allele

c Effect Allele Frequency

d Minor Allele Frequency

| Characteristics of the single nucleotide polymorphisms (SNP) used as instrumental variables for Waist-to-Hip Ratio Adjusted for BMI (Male)a |
| --- |

| SNP | Effect Allele | Other Allele | Effect (BETA)b | EAFc | MAFd | Standard Error | P-Value |
| --- | --- | --- | --- | --- | --- | --- | --- |
| rs10876528 | A | C | 0.033 | 0.3103 | 0.3103 | 0.0058 | 8.10E-09 |
| rs1106529 | G | A | -0.034 | 0.275 | 0.275 | 0.0059 | 4.80E-09 |
| rs1482852 | A | G | 0.032 | 0.6 | 0.4 | 0.0053 | 2.70E-09 |
| rs224333 | G | A | 0.036 | 0.6667 | 0.3333 | 0.0053 | 9.00E-12 |
| rs459193 | A | G | 0.032 | 0.2167 | 0.2167 | 0.0056 | 6.70E-09 |
| rs9491696 | G | C | 0.032 | 0.525 | 0.475 | 0.0049 | 4.70E-11 |

a The variants together explain 3.6% of the variation in Waist-to-Hip Ratio Adjusted for BMI (Male) (R2 = 0.036; F (TOTAL) = 597.355).

b Increase in Waist-to-Hip Ratio Adjusted for BMI (Male) per effect allele

c Effect Allele Frequency

d Minor Allele Frequency

| Characteristics of the single nucleotide polymorphisms (SNP) used as instrumental variables for Waist-to-Hip Ratio Adjusted for BMI (Female)a |
| --- |

| SNP | Effect Allele | Other Allele | Effect (BETA)b | EAFc | MAFd | Standard Error | P-Value |
| --- | --- | --- | --- | --- | --- | --- | --- |
| rs10195252 | T | C | 0.052 | 0.5583 | 0.4417 | 0.0046 | 4.70E-30 |
| rs1045241 | C | T | 0.034 | 0.6917 | 0.3083 | 0.005 | 6.60E-12 |
| rs10804591 | A | C | 0.04 | 0.85 | 0.15 | 0.0056 | 6.10E-13 |
| rs10991437 | A | C | 0.04 | 0.1 | 0.1 | 0.0072 | 2.80E-08 |
| rs11231693 | A | G | 0.068 | 0.0417 | 0.0417 | 0.01 | 2.70E-11 |
| rs12454712 | T | C | 0.035 | 0.6333 | 0.3667 | 0.0057 | 1.10E-09 |
| rs12489828 | G | T | 0.029 | 0.5167 | 0.4833 | 0.0046 | 2.60E-10 |
| rs12679556 | G | T | 0.033 | 0.2083 | 0.2083 | 0.0052 | 2.10E-10 |
| rs1294410 | C | T | 0.037 | 0.625 | 0.375 | 0.0046 | 1.60E-15 |
| rs1358980 | T | C | 0.06 | 0.45 | 0.45 | 0.0049 | 3.70E-34 |
| rs1443512 | A | C | 0.04 | 0.2 | 0.2 | 0.0052 | 1.10E-14 |
| rs1463679 | T | G | 0.04 | 0.175 | 0.175 | 0.0052 | 6.10E-15 |
| rs1776897 | G | T | 0.052 | 0.075 | 0.075 | 0.009 | 6.80E-09 |
| rs17819328 | G | T | 0.035 | 0.45 | 0.45 | 0.0047 | 4.60E-14 |
| rs1936807 | G | C | 0.052 | 0.55 | 0.45 | 0.0045 | 3.30E-30 |
| rs2179129 | A | G | 0.029 | 0.55 | 0.45 | 0.0046 | 2.10E-10 |
| rs2213732 | G | A | 0.029 | 0.4825 | 0.4825 | 0.0045 | 1.30E-10 |
| rs2371767 | G | C | 0.056 | 0.7917 | 0.2083 | 0.0052 | 1.20E-26 |
| rs2645294 | C | T | -0.035 | 0.4655 | 0.4655 | 0.0046 | 1.50E-14 |
| rs2820443 | C | T | -0.062 | 0.3 | 0.3 | 0.005 | 5.70E-35 |
| rs2925979 | T | C | 0.032 | 0.2833 | 0.2833 | 0.0049 | 3.40E-11 |
| rs3805389 | A | G | 0.027 | 0.2417 | 0.2417 | 0.005 | 4.60E-08 |
| rs3902751 | A | G | 0.039 | 0.225 | 0.225 | 0.0052 | 1.30E-13 |
| rs4646404 | G | A | 0.034 | 0.625 | 0.375 | 0.0051 | 5.30E-11 |
| rs6090583 | A | G | 0.029 | 0.4333 | 0.4333 | 0.0045 | 2.80E-10 |
| rs7133378 | G | A | 0.038 | 0.6333 | 0.3667 | 0.0049 | 7.20E-15 |
| rs7705502 | A | G | 0.027 | 0.2917 | 0.2917 | 0.0048 | 1.90E-08 |
| rs7830933 | A | G | 0.037 | 0.7417 | 0.2583 | 0.0053 | 1.20E-12 |
| rs7917772 | A | G | 0.027 | 0.6833 | 0.3167 | 0.0046 | 5.50E-09 |
| rs8066985 | A | G | 0.026 | 0.5167 | 0.4833 | 0.0045 | 4.00E-09 |
| rs905938 | C | T | -0.034 | 0.325 | 0.325 | 0.0054 | 4.90E-10 |
| rs9687846 | A | G | 0.041 | 0.1917 | 0.1917 | 0.0059 | 3.80E-12 |
| rs9991328 | T | C | 0.028 | 0.4833 | 0.4833 | 0.0045 | 3.40E-10 |

a The variants together explain 22.2% of the variation in Waist-to-Hip Ratio Adjusted for BMI (Female) (R2 = 0.222; F (TOTAL) = 1035.332).

b Increase in Waist-to-Hip Ratio Adjusted for BMI (Female) per effect allele

c Effect Allele Frequency

d Minor Allele Frequency

| Characteristics of the single nucleotide polymorphisms (SNP) used as instrumental variables for Waist-to-Hip Ratio (Male, ＞ 50 years)a |
| --- |

| SNP | Effect Allele | Other Allele | Effect (BETA)b | EAFc | MAFd | Standard Error | P-Value |
| --- | --- | --- | --- | --- | --- | --- | --- |
| rs10210513 | G | A | 0.044 | 0.13 | 0.13 | 0.0089 | 8.90E-07 |
| rs10850894 | G | A | 0.06 | 0.15 | 0.15 | 0.013 | 2.00E-06 |
| rs10923715 | A | T | 0.031 | 0.39 | 0.39 | 0.0062 | 4.70E-07 |
| rs12459350 | A | G | 0.03 | 0.55 | 0.45 | 0.0061 | 9.20E-07 |
| rs12902234 | C | G | 0.04 | 0.73 | 0.27 | 0.0084 | 1.60E-06 |
| rs1936800 | T | C | 0.035 | 0.55 | 0.45 | 0.0061 | 1.10E-08 |
| rs2291542 | T | C | 0.031 | 0.35 | 0.35 | 0.0067 | 3.50E-06 |
| rs319564 | C | T | 0.03 | 0.53 | 0.47 | 0.0063 | 1.70E-06 |
| rs459193 | A | G | 0.032 | 0.22 | 0.22 | 0.0069 | 4.10E-06 |
| rs4911180 | A | G | 0.035 | 0.65 | 0.35 | 0.0062 | 1.50E-08 |
| rs501423 | A | T | 0.046 | 0.53 | 0.47 | 0.0093 | 6.80E-07 |
| rs7258031 | T | C | 0.036 | 0.29 | 0.29 | 0.0066 | 8.40E-08 |
| rs7759742 | A | T | 0.036 | 0.52 | 0.48 | 0.0062 | 4.80E-09 |
| rs8043049 | T | C | 0.044 | 0.78 | 0.22 | 0.0082 | 1.00E-07 |
| rs9330204 | G | T | 0.034 | 0.38 | 0.38 | 0.0068 | 9.90E-07 |

a The variants together explain 10.6% of the variation in Waist-to-Hip Ratio Adjusted for BMI (Male, ＞ 50 years) (R2 = 0.106; F (TOTAL) = 736.162).

b Increase in Waist-to-Hip Ratio Adjusted for BMI (Male, ＞ 50 years) per effect allele

c Effect Allele Frequency

d Minor Allele Frequency

| Characteristics of the single nucleotide polymorphisms (SNP) used as instrumental variables for Waist-to-Hip Ratio (Female, ＞ 50 years)a |
| --- |

| SNP | Effect Allele | Other Allele | Effect (BETA)b | EAFc | MAFd | Standard Error | P-Value |
| --- | --- | --- | --- | --- | --- | --- | --- |
| rs10195252 | T | C | 0.049 | 0.56 | 0.44 | 0.0057 | 9.50E-18 |
| rs10783615 | G | A | 0.057 | 0.13 | 0.13 | 0.0082 | 3.10E-12 |
| rs10804591 | A | C | 0.046 | 0.85 | 0.15 | 0.007 | 5.00E-11 |
| rs10842707 | T | C | 0.043 | 0.17 | 0.17 | 0.0067 | 7.90E-11 |
| rs10919388 | A | C | -0.039 | 0.28 | 0.28 | 0.0066 | 2.70E-09 |
| rs13132420 | G | A | 0.042 | 0.66 | 0.34 | 0.0071 | 1.90E-09 |
| rs1894633 | G | A | 0.033 | 0.36 | 0.36 | 0.006 | 3.80E-08 |
| rs1936807 | G | C | 0.048 | 0.55 | 0.45 | 0.0057 | 4.30E-17 |
| rs2371767 | G | C | 0.052 | 0.79 | 0.21 | 0.0065 | 4.00E-16 |
| rs2645294 | C | T | -0.044 | 0.47 | 0.47 | 0.0057 | 1.70E-14 |
| rs2820436 | A | C | -0.061 | 0.32 | 0.32 | 0.006 | 3.60E-24 |
| rs2925979 | T | C | 0.035 | 0.28 | 0.28 | 0.0061 | 1.70E-08 |
| rs7830933 | A | G | 0.036 | 0.74 | 0.26 | 0.0066 | 2.80E-08 |
| rs863750 | T | C | 0.037 | 0.53 | 0.47 | 0.0057 | 7.10E-11 |
| rs912056 | T | A | 0.036 | 0.61 | 0.39 | 0.0058 | 7.20E-10 |
| rs998584 | A | C | 0.057 | 0.48 | 0.48 | 0.0063 | 1.50E-19 |

a The variants together explain 7.9% of the variation in Waist-to-Hip Ratio Adjusted for BMI (Female, ＞ 50 years) (R2 = 0.079; F (TOTAL) = 525.745).

b Increase in Waist-to-Hip Ratio Adjusted for BMI (Female, ＞ 50 years) per effect allele

c Effect Allele Frequency

d Minor Allele Frequency

| Characteristics of the single nucleotide polymorphisms (SNP) used as instrumental variables for Waist-to-Hip Ratio (Male, ＜ 50 years)a |
| --- |

| SNP | Effect Allele | Other Allele | Effect (BETA)b | EAFc | MAFd | Standard Error | P-Value |
| --- | --- | --- | --- | --- | --- | --- | --- |
| rs10917751 | T | C | -0.067 | 0.095 | 0.095 | 0.014 | 1.40E-06 |
| rs12243390 | T | G | 0.08 | 0.87 | 0.13 | 0.017 | 3.70E-06 |
| rs17451107 | T | C | 0.04 | 0.62 | 0.38 | 0.0085 | 2.90E-06 |
| rs3088050 | A | G | 0.05 | 0.2 | 0.2 | 0.0097 | 2.50E-07 |
| rs3786680 | C | T | 0.066 | 0.92 | 0.08 | 0.014 | 1.80E-06 |
| rs3801999 | G | A | 0.046 | 0.25 | 0.25 | 0.0098 | 2.00E-06 |
| rs840606 | C | A | 0.059 | 0.92 | 0.08 | 0.013 | 4.50E-06 |
| rs9285458 | A | G | 0.046 | 0.57 | 0.43 | 0.0078 | 2.30E-09 |
| rs9416085 | G | A | 0.048 | 0.71 | 0.29 | 0.01 | 2.10E-06 |
| rs9894371 | A | G | 0.046 | 0.45 | 0.45 | 0.0093 | 6.10E-07 |

a The variants together explain 6.5% of the variation in Waist-to-Hip Ratio Adjusted for BMI (Male, ＜ 50 years) (R2 = 0.065; F (TOTAL) = 325.546).

b Increase in Waist-to-Hip Ratio Adjusted for BMI (Male, ＜ 50 years) per effect allele

c Effect Allele Frequency

d Minor Allele Frequency

| Characteristics of the single nucleotide polymorphisms (SNP) used as instrumental variables for Waist-to-Hip Ratio (Female, ＜ 50 years)a |
| --- |

| SNP | Effect Allele | Other Allele | Effect (BETA)b | EAFc | MAFd | Standard Error | P-Value |
| --- | --- | --- | --- | --- | --- | --- | --- |
| rs1106529 | G | A | -0.048 | 0.28 | 0.28 | 0.0082 | 5.00E-09 |
| rs1294438 | C | T | 0.044 | 0.67 | 0.33 | 0.0078 | 1.70E-08 |
| rs16863031 | A | G | 0.08 | 0.091 | 0.091 | 0.014 | 5.20E-09 |
| rs2294239 | A | G | 0.044 | 0.55 | 0.45 | 0.0074 | 2.80E-09 |
| rs2745353 | T | C | 0.056 | 0.55 | 0.45 | 0.0071 | 4.70E-15 |
| rs2820443 | C | T | -0.061 | 0.3 | 0.3 | 0.0081 | 4.60E-14 |
| rs3902751 | A | G | 0.053 | 0.22 | 0.22 | 0.0082 | 1.50E-10 |
| rs6717858 | T | C | 0.062 | 0.54 | 0.46 | 0.0075 | 1.10E-16 |
| rs9860730 | A | G | 0.048 | 0.77 | 0.23 | 0.0078 | 1.00E-09 |
| rs998584 | A | C | 0.064 | 0.48 | 0.48 | 0.0083 | 2.30E-14 |

a The variants together explain 6.4% of the variation in Waist-to-Hip Ratio Adjusted for BMI (Female, ＜ 50 years) (R2 = 0.064; F (TOTAL) = 452.358).

b Increase in Waist-to-Hip Ratio Adjusted for BMI (Female, ＜ 50 years) per effect allele

c Effect Allele Frequency

d Minor Allele Frequency

| Characteristics of the single nucleotide polymorphisms (SNP) used as instrumental variables for Coronary Artery Diseasea |
| --- |

| SNP | Effect Allele | Other Allele | Effect (BETA)b | EAFc | MAFd | Standard Error | P-Value |
| --- | --- | --- | --- | --- | --- | --- | --- |
| rs10131519 | C | T | 0.0499015 | 0.1541 | 0.1541 | 0.00896942 | 2.60E-08 |
| rs10793514 | C | T | 0.050745 | 0.664 | 0.336 | 0.00732817 | 4.40E-12 |
| rs10841443 | G | C | 0.0434628 | 0.327 | 0.327 | 0.00743951 | 5.20E-09 |
| rs10857147 | T | A | 0.0463068 | 0.7356 | 0.2644 | 0.00775189 | 2.30E-09 |
| rs11057840 | C | A | 0.0712462 | 0.832 | 0.168 | 0.010064 | 1.40E-12 |
| rs11072783 | A | G | -0.0559577 | 0.8211 | 0.1789 | 0.00921143 | 1.20E-09 |
| rs112043140 | T | C | 0.0464319 | 0.7863 | 0.2137 | 0.00836611 | 2.90E-08 |
| rs1148497 | G | A | -0.0459098 | 0.2167 | 0.2167 | 0.00840655 | 4.70E-08 |
| rs11591147 | T | G | -0.236991 | 0.9791 | 0.0209 | 0.0269669 | 1.50E-18 |
| rs11601507 | A | C | 0.08101 | 0.0676 | 0.0676 | 0.0135176 | 2.10E-09 |
| rs11617955 | A | T | -0.0850161 | 0.1233 | 0.1233 | 0.0112425 | 4.00E-14 |
| rs11619113 | G | C | 0.0578467 | 0.8748 | 0.1252 | 0.0104402 | 3.00E-08 |
| rs11637783 | C | T | -0.0639685 | 0.4632 | 0.4632 | 0.00703531 | 9.70E-20 |
| rs11673093 | A | G | 0.0444459 | 0.2614 | 0.2614 | 0.00801889 | 3.00E-08 |
| rs117733303 | G | A | 0.451693 | 0.9881 | 0.0119 | 0.0263634 | 8.40E-66 |
| rs12212146 | C | T | -0.0885558 | 0.0557 | 0.0557 | 0.0139383 | 2.10E-10 |
| rs12315434 | C | A | -0.0504595 | 0.8141 | 0.1859 | 0.00849456 | 2.80E-09 |
| rs1250259 | A | T | -0.0472229 | 0.7674 | 0.2326 | 0.00795248 | 2.90E-09 |
| rs12740374 | T | G | -0.103964 | 0.7873 | 0.2127 | 0.00832224 | 8.20E-36 |
| rs12930452 | G | A | 0.0489638 | 0.4334 | 0.4334 | 0.00710447 | 5.50E-12 |
| rs1412444 | T | C | 0.0494546 | 0.3608 | 0.3608 | 0.00732169 | 1.40E-11 |
| rs146534110 | T | G | 0.208513 | 0.9881 | 0.0119 | 0.0311565 | 2.20E-11 |
| rs15285 | T | C | -0.0479628 | 0.3171 | 0.3171 | 0.00766904 | 4.00E-10 |
| rs16986953 | A | G | 0.0811619 | 0.0885 | 0.0885 | 0.0134115 | 1.40E-09 |
| rs17114046 | G | A | -0.0965988 | 0.8817 | 0.1183 | 0.011807 | 2.80E-16 |
| rs17228058 | G | A | -0.0518457 | 0.7843 | 0.2157 | 0.00828913 | 4.00E-10 |
| rs17263917 | A | G | -0.0617289 | 0.1402 | 0.1402 | 0.00981879 | 3.20E-10 |
| rs17465982 | A | G | 0.0661231 | 0.7376 | 0.2624 | 0.00767948 | 7.30E-18 |
| rs17612693 | A | T | 0.0808415 | 0.1461 | 0.1461 | 0.00989856 | 3.20E-16 |
| rs1966248 | T | A | -0.0705667 | 0.2952 | 0.2952 | 0.00759315 | 1.50E-20 |
| rs2107595 | A | G | 0.0765849 | 0.8320 | 0.168 | 0.00953232 | 9.40E-16 |
| rs2128739 | C | A | -0.0659813 | 0.7276 | 0.2724 | 0.00769929 | 1.00E-17 |
| rs2140480 | C | T | -0.0437311 | 0.2813 | 0.2813 | 0.00781775 | 2.20E-08 |
| rs2166529 | T | G | 0.0563709 | 0.4901 | 0.4901 | 0.00703554 | 1.10E-15 |
| rs223290 | C | T | -0.0972662 | 0.9294 | 0.0706 | 0.0141694 | 6.70E-12 |
| rs2293251 | G | T | 0.061081 | 0.8559 | 0.1441 | 0.00972645 | 3.40E-10 |
| rs246600 | T | C | 0.0436477 | 0.4990 | 0.499 | 0.00697937 | 4.00E-10 |
| rs2649999 | C | T | -0.0426176 | 0.6352 | 0.3648 | 0.00754609 | 1.60E-08 |
| rs28451064 | A | G | 0.0992826 | 0.1302 | 0.1302 | 0.010756 | 2.70E-20 |
| rs28601761 | G | C | -0.0565722 | 0.5924 | 0.4076 | 0.00715987 | 2.80E-15 |
| rs2891168 | G | A | 0.170449 | 0.5080 | 0.492 | 0.00698643 | 1.80E-131 |
| rs3127580 | T | C | 0.0852488 | 0.1421 | 0.1421 | 0.0097662 | 2.60E-18 |
| rs318719 | C | T | 0.0753397 | 0.9294 | 0.0706 | 0.0129274 | 5.60E-09 |
| rs3741380 | A | G | 0.0411267 | 0.4881 | 0.4881 | 0.00696966 | 3.60E-09 |
| rs3796581 | G | A | -0.0686675 | 0.2018 | 0.2018 | 0.00901791 | 2.60E-14 |
| rs3918226 | T | C | 0.0973361 | 0.9016 | 0.0984 | 0.0132838 | 2.30E-13 |
| rs4280376 | C | T | 0.0556503 | 0.1998 | 0.1998 | 0.00898148 | 5.80E-10 |
| rs4299376 | T | G | -0.0453634 | 0.3072 | 0.3072 | 0.00750664 | 1.50E-09 |
| rs4678145 | C | G | 0.0638718 | 0.1292 | 0.1292 | 0.0103562 | 6.90E-10 |
| rs4762479 | T | C | -0.0845687 | 0.9423 | 0.0577 | 0.0133708 | 2.50E-10 |
| rs4766578 | A | T | -0.0650727 | 0.5229 | 0.4771 | 0.00710609 | 5.30E-20 |
| rs4803455 | A | C | -0.0498537 | 0.4990 | 0.499 | 0.00700573 | 1.10E-12 |
| rs4932373 | C | A | 0.0690675 | 0.6809 | 0.3191 | 0.00749916 | 3.30E-20 |
| rs55730499 | T | C | 0.310796 | 0.9245 | 0.0755 | 0.0133477 | 6.30E-120 |
| rs56210800 | G | C | 0.0625814 | 0.8708 | 0.1292 | 0.0104057 | 1.80E-09 |
| rs566818 | G | A | -0.0424439 | 0.3032 | 0.3032 | 0.00767498 | 3.20E-08 |
| rs604723 | C | T | 0.0497259 | 0.7416 | 0.2584 | 0.00788361 | 2.80E-10 |
| rs6460942 | C | T | -0.0594155 | 0.1392 | 0.1392 | 0.0102857 | 7.60E-09 |
| rs6511720 | T | G | -0.108449 | 0.8897 | 0.1103 | 0.0107003 | 3.90E-24 |
| rs655720 | T | C | 0.0539449 | 0.2883 | 0.2883 | 0.00772427 | 2.90E-12 |
| rs685031 | A | G | 0.0455576 | 0.2863 | 0.2863 | 0.00722986 | 3.00E-10 |
| rs6905288 | A | G | 0.0412788 | 0.5964 | 0.4036 | 0.00702633 | 4.20E-09 |
| rs701145 | C | T | 0.0656202 | 0.1342 | 0.1342 | 0.00982325 | 2.40E-11 |
| rs7209460 | T | C | 0.0521745 | 0.2734 | 0.2734 | 0.00762218 | 7.60E-12 |
| rs72934535 | C | T | 0.100422 | 0.1133 | 0.1133 | 0.011558 | 3.70E-18 |
| rs7412 | T | C | -0.136727 | 0.9374 | 0.0626 | 0.0127411 | 7.30E-27 |
| rs7502499 | A | G | 0.0525639 | 0.3221 | 0.3221 | 0.00754823 | 3.30E-12 |
| rs7678555 | C | A | 0.0456648 | 0.6889 | 0.3111 | 0.00774516 | 3.70E-09 |
| rs77347777 | T | C | -0.0608129 | 0.8976 | 0.1024 | 0.0110457 | 3.70E-08 |
| rs7896600 | C | G | 0.0454541 | 0.2584 | 0.2584 | 0.00813514 | 2.30E-08 |
| rs8003602 | C | T | 0.0552204 | 0.7584 | 0.2416 | 0.00796464 | 4.10E-12 |
| rs9337951 | A | G | 0.0501455 | 0.3489 | 0.3489 | 0.0076177 | 4.60E-11 |
| rs9349379 | G | A | 0.0932439 | 0.5994 | 0.4006 | 0.00714879 | 6.90E-39 |
| rs9554448 | C | T | -0.0629435 | 0.0924 | 0.0924 | 0.0114556 | 3.90E-08 |
| rs964184 | C | G | -0.0603692 | 0.8380 | 0.162 | 0.0100968 | 2.20E-09 |

a The variants together explain 5.8% of the variation in Coronary Artery Disease (R2 = 0.058; F (TOTAL) = 423.156).

b Increase in odds of Coronary Artery Disease in per effect allele.

c Effect Allele Frequency

d Minor Allele Frequency

| Characteristics of the single nucleotide polymorphisms (SNP) used as instrumental variables for Myocardial Infractiona |
| --- |

| SNP | Effect Allele | Other Allele | Effect (BETA)b | EAFc | MAFd | Standard Error | P-Value |
| --- | --- | --- | --- | --- | --- | --- | --- |
| rs10176176 | T | A | 0.0646494 | 0.470215 | 0.470215 | 0.0102571 | 2.92E-10 |
| rs10455872 | G | A | 0.284774 | 0.0543559 | 0.0543559 | 0.0265918 | 9.23E-27 |
| rs10947786 | A | G | -0.0718678 | 0.207597 | 0.207597 | 0.0127579 | 1.77E-08 |
| rs113113862 | A | G | -0.075448 | 0.218279 | 0.218279 | 0.0126926 | 2.78E-09 |
| rs11556924 | T | C | -0.0689191 | 0.29769 | 0.29769 | 0.0125521 | 4.00E-08 |
| rs1332329 | C | A | 0.0791447 | 0.362018 | 0.362018 | 0.0108279 | 2.68E-13 |
| rs1510226 | C | T | 0.226442 | 0.0271216 | 0.0271216 | 0.0346256 | 6.16E-11 |
| rs180803 | T | G | -0.186597 | 0.0283823 | 0.0283823 | 0.0316322 | 3.66E-09 |
| rs1870634 | G | T | 0.0696961 | 0.617875 | 0.382125 | 0.0107322 | 8.35E-11 |
| rs2019090 | T | A | -0.0654617 | 0.642344 | 0.357656 | 0.0110961 | 3.65E-09 |
| rs2327426 | C | T | -0.0625017 | 0.297863 | 0.297863 | 0.0109701 | 1.22E-08 |
| rs2505083 | C | T | 0.0612049 | 0.394508 | 0.394508 | 0.0105661 | 6.93E-09 |
| rs2681472 | G | A | 0.0727045 | 0.19414 | 0.19414 | 0.0125054 | 6.11E-09 |
| rs28451064 | A | G | 0.122318 | 0.119331 | 0.119331 | 0.0177856 | 6.10E-12 |
| rs35700460 | G | A | 0.0818302 | 0.646502 | 0.353498 | 0.0121909 | 1.91E-11 |
| rs41290120 | A | G | -0.185714 | 0.0323735 | 0.0323735 | 0.0311929 | 2.62E-09 |
| rs4773141 | G | C | 0.0802207 | 0.345079 | 0.345079 | 0.0128785 | 4.69E-10 |
| rs4977574 | G | A | 0.188677 | 0.482238 | 0.482238 | 0.0102921 | 4.58E-75 |
| rs532436 | A | G | 0.110862 | 0.18758 | 0.18758 | 0.0130822 | 2.36E-17 |
| rs653178 | T | C | -0.0770565 | 0.558224 | 0.441776 | 0.0115792 | 2.84E-11 |
| rs7173743 | C | T | -0.0639689 | 0.432422 | 0.432422 | 0.0104014 | 7.75E-10 |
| rs72689147 | T | G | -0.0735497 | 0.179559 | 0.179559 | 0.0130277 | 1.65E-08 |
| rs7528419 | G | A | -0.101314 | 0.201938 | 0.201938 | 0.0126204 | 9.92E-16 |
| rs9349379 | G | A | 0.130965 | 0.41079 | 0.41079 | 0.0106499 | 9.37E-35 |
| rs9970807 | T | C | -0.110641 | 0.0836228 | 0.0836228 | 0.0183978 | 1.81E-09 |

a The variants together explain 4.1% of the variation in Myocardial Infraction (R2 = 0.041; F (TOTAL) = 270.991).

b Increase in odds of Myocardial Infraction in per effect allele.

c Effect Allele Frequency

d Minor Allele Frequency

| Characteristics of the single nucleotide polymorphisms (SNP) used as instrumental variables for Hypertensiona |
| --- |

| SNP | Effect Allele | Other Allele | Effect (BETA)b | EAFc | MAFd | Standard Error | P-Value |
| --- | --- | --- | --- | --- | --- | --- | --- |
| rs10059884 | A | C | 0.0651 | 0.5856 | 0.4144 | 0.0092 | 1.92E-12 |
| rs10185395 | T | G | 0.0587 | 0.243 | 0.243 | 0.0107 | 3.54E-08 |
| rs10206833 | A | G | -0.079 | 0.8661 | 0.1339 | 0.0134 | 3.56E-09 |
| rs10217559 | T | C | 0.0584 | 0.6936 | 0.3064 | 0.0099 | 3.87E-09 |
| rs10757274 | G | A | 0.0507 | 0.432 | 0.432 | 0.0092 | 3.52E-08 |
| rs10786736 | C | G | -0.1089 | 0.09173 | 0.09173 | 0.0158 | 5.49E-12 |
| rs11636952 | C | T | -0.055 | 0.6071 | 0.3929 | 0.0094 | 4.21E-09 |
| rs117515309 | A | C | -0.1088 | 0.06182 | 0.06182 | 0.019 | 1.10E-08 |
| rs12509595 | C | T | 0.1157 | 0.3122 | 0.3122 | 0.0099 | 1.34E-31 |
| rs1275984 | C | A | -0.0953 | 0.549 | 0.451 | 0.0092 | 3.38E-25 |
| rs12828438 | G | A | -0.0606 | 0.5354 | 0.4646 | 0.0092 | 5.01E-11 |
| rs13112725 | C | G | 0.0697 | 0.8285 | 0.1715 | 0.0121 | 9.34E-09 |
| rs1317181 | T | G | 0.0701 | 0.2099 | 0.2099 | 0.0112 | 4.04E-10 |
| rs1358350 | A | T | 0.0663 | 0.7541 | 0.2459 | 0.0106 | 4.59E-10 |
| rs1374264 | C | A | -0.0603 | 0.4146 | 0.4146 | 0.0092 | 6.95E-11 |
| rs143439093 | G | A | -0.1373 | 0.07436 | 0.07436 | 0.0175 | 5.01E-15 |
| rs145153053 | G | A | 0.0707 | 0.1963 | 0.1963 | 0.0115 | 7.54E-10 |
| rs149150643 | C | T | -0.1328 | 0.04503 | 0.04503 | 0.0222 | 2.27E-09 |
| rs167479 | T | G | -0.0833 | 0.4249 | 0.4249 | 0.0093 | 2.66E-19 |
| rs16853076 | C | T | -0.1096 | 0.06089 | 0.06089 | 0.0192 | 1.06E-08 |
| rs1888693 | A | G | 0.06 | 0.386 | 0.386 | 0.0094 | 1.45E-10 |
| rs2032451 | T | G | 0.0886 | 0.1098 | 0.1098 | 0.0146 | 1.28E-09 |
| rs2190994 | T | G | -0.06 | 0.276 | 0.276 | 0.0103 | 5.09E-09 |
| rs2274224 | C | G | -0.0751 | 0.3456 | 0.3456 | 0.0096 | 5.64E-15 |
| rs2392929 | G | T | 0.062 | 0.2979 | 0.2979 | 0.01 | 5.21E-10 |
| rs2627313 | T | C | 0.054 | 0.4006 | 0.4006 | 0.0093 | 7.35E-09 |
| rs2643826 | T | C | 0.0627 | 0.4047 | 0.4047 | 0.0093 | 1.75E-11 |
| rs2782981 | C | T | 0.0799 | 0.6546 | 0.3454 | 0.0096 | 8.71E-17 |
| rs28567725 | C | T | 0.0617 | 0.4136 | 0.4136 | 0.0093 | 2.76E-11 |
| rs303949 | C | A | 0.0849 | 0.09934 | 0.09934 | 0.0153 | 2.70E-08 |
| rs34071855 | G | C | 0.1033 | 0.415 | 0.415 | 0.0093 | 1.04E-28 |
| rs35427 | G | T | -0.0592 | 0.3644 | 0.3644 | 0.0096 | 5.91E-10 |
| rs35619711 | G | C | 0.0614 | 0.7217 | 0.2783 | 0.0102 | 1.65E-09 |
| rs3790604 | A | C | 0.1321 | 0.1709 | 0.1709 | 0.0121 | 1.40E-27 |
| rs3796585 | A | G | -0.0751 | 0.3465 | 0.3465 | 0.0096 | 4.48E-15 |
| rs3918226 | T | C | 0.1721 | 0.0699 | 0.0699 | 0.0179 | 7.08E-22 |
| rs4371736 | C | G | -0.0527 | 0.3821 | 0.3821 | 0.0094 | 2.09E-08 |
| rs4685218 | T | C | 0.0984 | 0.09873 | 0.09873 | 0.0153 | 1.30E-10 |
| rs4932373 | C | A | 0.0837 | 0.2674 | 0.2674 | 0.0103 | 5.58E-16 |
| rs557675 | G | T | -0.0613 | 0.3969 | 0.3969 | 0.0093 | 5.42E-11 |
| rs604723 | C | T | 0.0632 | 0.741 | 0.259 | 0.0104 | 1.36E-09 |
| rs62426324 | T | C | 0.0528 | 0.5009 | 0.4991 | 0.0091 | 7.13E-09 |
| rs62434119 | T | C | -0.1345 | 0.07595 | 0.07595 | 0.0172 | 6.23E-15 |
| rs62455829 | G | A | -0.0598 | 0.2782 | 0.2782 | 0.0103 | 5.68E-09 |
| rs629929 | T | G | 0.0595 | 0.5795 | 0.4205 | 0.0093 | 1.36E-10 |
| rs6668768 | T | C | 0.0668 | 0.2144 | 0.2144 | 0.0111 | 1.87E-09 |
| rs6860901 | T | C | 0.0682 | 0.2979 | 0.2979 | 0.01 | 7.68E-12 |
| rs6918791 | G | C | 0.0574 | 0.728 | 0.272 | 0.0103 | 2.15E-08 |
| rs6961048 | G | C | 0.0735 | 0.1355 | 0.1355 | 0.0133 | 3.39E-08 |
| rs7123467 | G | C | 0.0682 | 0.202 | 0.202 | 0.0114 | 2.47E-09 |
| rs7134677 | T | C | -0.0748 | 0.3819 | 0.3819 | 0.0094 | 2.13E-15 |
| rs72779268 | A | C | -0.1222 | 0.06436 | 0.06436 | 0.0187 | 6.32E-11 |
| rs7310615 | G | C | -0.0816 | 0.5863 | 0.4137 | 0.0093 | 1.37E-18 |
| rs7483477 | G | T | 0.0759 | 0.2348 | 0.2348 | 0.0109 | 3.12E-12 |
| rs7545442 | T | C | 0.098 | 0.07246 | 0.07246 | 0.0176 | 2.74E-08 |
| rs78412528 | A | G | 0.1406 | 0.1674 | 0.1674 | 0.0122 | 1.03E-30 |
| rs79873333 | T | C | -0.1364 | 0.04758 | 0.04758 | 0.0215 | 2.11E-10 |
| rs9899012 | A | G | -0.1068 | 0.08387 | 0.08387 | 0.0166 | 1.41E-10 |

a The variants together explain 6.4% of the variation in Hypertension (R2 = 0.064; F (TOTAL) = 241.319).

b Increase in odds of Hypertension in per effect allele.

c Effect Allele Frequency

d Minor Allele Frequency

| Characteristics of the single nucleotide polymorphisms (SNP) used as instrumental variables for Systolic Blood Pressurea |
| --- |

| SNP | Effect Allele | Other Allele | Effect (BETA)b | EAFc | MAFd | Standard Error | P-Value |
| --- | --- | --- | --- | --- | --- | --- | --- |
| rs1000423 | T | C | 0.4138 | 0.7316 | 0.2684 | 0.0346 | 6.50E-33 |
| rs10008637 | C | T | -0.2157 | 0.4595 | 0.4595 | 0.0302 | 9.24E-13 |
| rs10028284 | T | A | -0.2937 | 0.1816 | 0.1816 | 0.0398 | 1.69E-13 |
| rs10045307 | G | C | 0.2024 | 0.227 | 0.227 | 0.0362 | 2.21E-08 |
| rs10048404 | T | C | -0.2607 | 0.3701 | 0.3701 | 0.0317 | 1.91E-16 |
| rs1006545 | T | G | 0.6846 | 0.8872 | 0.1128 | 0.048 | 3.50E-46 |
| rs10069690 | T | C | 0.3098 | 0.2582 | 0.2582 | 0.0369 | 4.47E-17 |
| rs1010064 | C | A | -0.3571 | 0.1837 | 0.1837 | 0.0387 | 3.02E-20 |
| rs1012089 | G | C | 0.192 | 0.5248 | 0.4752 | 0.0302 | 1.95E-10 |
| rs10188003 | T | C | 0.1883 | 0.393 | 0.393 | 0.0307 | 8.80E-10 |
| rs10207726 | T | C | -0.2142 | 0.296 | 0.296 | 0.033 | 8.06E-11 |
| rs10224210 | C | T | 0.3831 | 0.2789 | 0.2789 | 0.034 | 1.60E-29 |
| rs10282122 | T | C | -0.302 | 0.6684 | 0.3316 | 0.0327 | 2.46E-20 |
| rs10420519 | T | G | -0.4921 | 0.0347 | 0.0347 | 0.0887 | 2.86E-08 |
| rs1044822 | T | C | -0.248 | 0.1482 | 0.1482 | 0.0424 | 5.16E-09 |
| rs10460108 | G | A | -0.2141 | 0.5199 | 0.4801 | 0.0301 | 1.12E-12 |
| rs1049212 | G | A | 0.299 | 0.5693 | 0.4307 | 0.0302 | 4.59E-23 |
| rs10501410 | A | G | 0.4122 | 0.0692 | 0.0692 | 0.0607 | 1.10E-11 |
| rs1052501 | T | C | 0.2262 | 0.8329 | 0.1671 | 0.0412 | 4.14E-08 |
| rs10749572 | T | G | -0.203 | 0.5444 | 0.4556 | 0.0302 | 1.88E-11 |
| rs10750441 | T | C | 0.1754 | 0.6621 | 0.3379 | 0.0319 | 3.74E-08 |
| rs10776752 | T | G | 0.8211 | 0.0809 | 0.0809 | 0.0576 | 4.61E-46 |
| rs10777213 | A | G | -0.1786 | 0.5244 | 0.4756 | 0.0299 | 2.45E-09 |
| rs10779795 | G | A | -0.2191 | 0.3387 | 0.3387 | 0.032 | 7.44E-12 |
| rs10782230 | A | G | 0.2106 | 0.4845 | 0.4845 | 0.0302 | 2.91E-12 |
| rs10804330 | C | T | -0.2351 | 0.4332 | 0.4332 | 0.0306 | 1.62E-14 |
| rs10914124 | C | T | -0.234 | 0.3833 | 0.3833 | 0.0312 | 6.32E-14 |
| rs10941043 | G | T | 0.2585 | 0.2902 | 0.2902 | 0.0332 | 6.42E-15 |
| rs10980408 | C | T | 0.7606 | 0.0359 | 0.0359 | 0.0827 | 3.83E-20 |
| rs11097909 | C | T | 0.3628 | 0.8528 | 0.1472 | 0.043 | 3.35E-17 |
| rs11120093 | T | C | -0.1792 | 0.4082 | 0.4082 | 0.0307 | 5.13E-09 |
| rs11145807 | G | A | -0.2135 | 0.5943 | 0.4057 | 0.0322 | 3.54E-11 |
| rs11159091 | A | G | 0.1978 | 0.4615 | 0.4615 | 0.0303 | 6.79E-11 |
| rs111866816 | T | C | 0.3569 | 0.0709 | 0.0709 | 0.0597 | 2.29E-09 |
| rs11191580 | C | T | -1.0995 | 0.0824 | 0.0824 | 0.055 | 7.74E-89 |
| rs11210029 | G | A | 0.203 | 0.3678 | 0.3678 | 0.0313 | 8.92E-11 |
| rs11222084 | T | A | 0.3363 | 0.3621 | 0.3621 | 0.0316 | 1.80E-26 |
| rs11241313 | T | C | -0.2071 | 0.3112 | 0.3112 | 0.0326 | 2.23E-10 |
| rs112509803 | C | G | -0.2641 | 0.1138 | 0.1138 | 0.0477 | 3.18E-08 |
| rs11252324 | T | G | -0.4164 | 0.0771 | 0.0771 | 0.0573 | 3.61E-13 |
| rs112854918 | G | C | 0.5577 | 0.0255 | 0.0255 | 0.1004 | 2.77E-08 |
| rs113086489 | T | C | 0.3249 | 0.5525 | 0.4475 | 0.0307 | 3.80E-26 |
| rs1133400 | G | A | 0.2975 | 0.214 | 0.214 | 0.0376 | 2.53E-15 |
| rs113695818 | T | C | -0.1835 | 0.3032 | 0.3032 | 0.033 | 2.62E-08 |
| rs115262049 | T | A | -0.5893 | 0.0868 | 0.0868 | 0.0552 | 1.29E-26 |
| rs1154214 | G | T | 0.2031 | 0.6037 | 0.3963 | 0.0306 | 3.27E-11 |
| rs11585169 | A | T | 0.1796 | 0.5773 | 0.4227 | 0.0308 | 5.34E-09 |
| rs11592107 | A | G | 0.3024 | 0.3096 | 0.3096 | 0.0326 | 1.55E-20 |
| rs11604357 | A | C | -0.277 | 0.1622 | 0.1622 | 0.0411 | 1.60E-11 |
| rs11636952 | C | T | -0.5313 | 0.6859 | 0.3141 | 0.0328 | 4.22E-59 |
| rs11641374 | A | C | -0.1943 | 0.5995 | 0.4005 | 0.0309 | 3.26E-10 |
| rs11655604 | T | C | -0.2033 | 0.3579 | 0.3579 | 0.0333 | 1.09E-09 |
| rs11672660 | T | C | 0.2212 | 0.1996 | 0.1996 | 0.0381 | 6.32E-09 |
| rs1169078 | G | C | 0.1971 | 0.3121 | 0.3121 | 0.0327 | 1.68E-09 |
| rs11694601 | G | A | 0.1909 | 0.4032 | 0.4032 | 0.0309 | 6.41E-10 |
| rs117206641 | T | C | 0.3154 | 0.1108 | 0.1108 | 0.0499 | 2.66E-10 |
| rs117464403 | A | G | 0.864 | 0.0183 | 0.0183 | 0.1199 | 5.80E-13 |
| rs11834380 | A | C | -0.2785 | 0.0968 | 0.0968 | 0.051 | 4.77E-08 |
| rs11874246 | T | C | 0.2856 | 0.2963 | 0.2963 | 0.0328 | 3.22E-18 |
| rs11925504 | A | G | -0.2901 | 0.5721 | 0.4279 | 0.0305 | 1.78E-21 |
| rs11960210 | C | T | -0.4727 | 0.3755 | 0.3755 | 0.0313 | 1.25E-51 |
| rs11977526 | A | G | -0.3213 | 0.4009 | 0.4009 | 0.0312 | 6.62E-25 |
| rs1199330 | G | A | 0.2654 | 0.1176 | 0.1176 | 0.047 | 1.65E-08 |
| rs12042924 | C | T | 0.1807 | 0.4716 | 0.4716 | 0.0303 | 2.62E-09 |
| rs12063372 | A | G | 0.1989 | 0.3846 | 0.3846 | 0.0318 | 3.86E-10 |
| rs1209384 | G | A | -0.2558 | 0.6122 | 0.3878 | 0.0313 | 2.85E-16 |
| rs12136922 | A | G | 0.2027 | 0.4949 | 0.4949 | 0.0304 | 2.69E-11 |
| rs12153395 | A | G | -0.3303 | 0.1147 | 0.1147 | 0.0486 | 1.07E-11 |
| rs12255372 | T | G | 0.2358 | 0.2883 | 0.2883 | 0.0335 | 1.94E-12 |
| rs12258967 | G | C | -0.6327 | 0.2953 | 0.2953 | 0.0337 | 1.08E-78 |
| rs12264186 | T | C | 0.2135 | 0.1871 | 0.1871 | 0.0387 | 3.58E-08 |
| rs12321 | C | G | -0.2292 | 0.4328 | 0.4328 | 0.0303 | 3.81E-14 |
| rs12426261 | G | A | -0.3775 | 0.6208 | 0.3792 | 0.0309 | 2.31E-34 |
| rs12464602 | A | G | -0.2437 | 0.6208 | 0.3792 | 0.0315 | 1.02E-14 |
| rs12509595 | C | T | 0.8367 | 0.2923 | 0.2923 | 0.0334 | 2.55E-138 |
| rs12511987 | G | T | 0.2329 | 0.1774 | 0.1774 | 0.0399 | 5.39E-09 |
| rs12528975 | A | G | 0.4751 | 0.0489 | 0.0489 | 0.0747 | 1.98E-10 |
| rs12596630 | T | C | 0.4278 | 0.0903 | 0.0903 | 0.0547 | 5.01E-15 |
| rs12610654 | G | A | -0.2315 | 0.3436 | 0.3436 | 0.032 | 4.41E-13 |
| rs12627651 | A | G | 0.3498 | 0.2872 | 0.2872 | 0.0341 | 1.02E-24 |
| rs12637573 | G | A | 0.1731 | 0.5282 | 0.4718 | 0.0302 | 9.95E-09 |
| rs12643599 | G | A | -0.3134 | 0.3605 | 0.3605 | 0.0313 | 1.23E-23 |
| rs12656497 | C | T | 0.6382 | 0.5966 | 0.4034 | 0.0307 | 7.14E-96 |
| rs12657950 | T | C | 0.455 | 0.0744 | 0.0744 | 0.059 | 1.27E-14 |
| rs12661036 | C | T | 0.2104 | 0.225 | 0.225 | 0.0374 | 1.82E-08 |
| rs12668436 | C | T | 0.2151 | 0.2459 | 0.2459 | 0.035 | 7.88E-10 |
| rs12693982 | T | C | 0.2575 | 0.4024 | 0.4024 | 0.0309 | 7.49E-17 |
| rs12694277 | C | T | 0.2018 | 0.7054 | 0.2946 | 0.0335 | 1.80E-09 |
| rs12731646 | T | C | -0.189 | 0.409 | 0.409 | 0.0307 | 7.21E-10 |
| rs1275985 | T | C | -0.5411 | 0.6133 | 0.3867 | 0.0308 | 4.73E-69 |
| rs12883810 | T | C | -0.2382 | 0.1462 | 0.1462 | 0.0428 | 2.70E-08 |
| rs12885878 | G | A | 0.2291 | 0.7663 | 0.2337 | 0.0367 | 4.32E-10 |
| rs12906962 | C | T | 0.2653 | 0.324 | 0.324 | 0.0325 | 3.28E-16 |
| rs1290784 | T | C | 0.4124 | 0.4483 | 0.4483 | 0.0303 | 2.97E-42 |
| rs1290933 | A | C | -0.2847 | 0.6919 | 0.3081 | 0.0327 | 3.17E-18 |
| rs12926550 | A | G | -0.2548 | 0.3156 | 0.3156 | 0.0324 | 3.43E-15 |
| rs1293969 | C | T | 0.1988 | 0.2516 | 0.2516 | 0.0347 | 1.03E-08 |
| rs12978472 | G | C | -0.845 | 0.1241 | 0.1241 | 0.049 | 1.23E-66 |
| rs13016772 | T | C | 0.2522 | 0.7651 | 0.2349 | 0.0355 | 1.23E-12 |
| rs13091418 | G | C | 0.2234 | 0.3341 | 0.3341 | 0.0325 | 6.15E-12 |
| rs13107261 | A | G | -0.1778 | 0.3687 | 0.3687 | 0.0314 | 1.57E-08 |
| rs13107325 | T | C | -0.9086 | 0.0739 | 0.0739 | 0.0592 | 4.22E-53 |
| rs13204703 | C | T | -0.1967 | 0.2489 | 0.2489 | 0.035 | 1.94E-08 |
| rs13253358 | T | C | 0.2127 | 0.2979 | 0.2979 | 0.033 | 1.13E-10 |
| rs1332813 | C | T | -0.2203 | 0.6486 | 0.3514 | 0.0314 | 2.32E-12 |
| rs13358657 | G | A | 0.388 | 0.1332 | 0.1332 | 0.0445 | 2.95E-18 |
| rs1340030 | C | T | -0.1936 | 0.3655 | 0.3655 | 0.0312 | 5.77E-10 |
| rs13412750 | A | G | -0.2889 | 0.2708 | 0.2708 | 0.0341 | 2.32E-17 |
| rs13420463 | G | A | -0.3143 | 0.2266 | 0.2266 | 0.036 | 2.72E-18 |
| rs1375564 | T | C | 0.2579 | 0.6395 | 0.3605 | 0.0315 | 2.84E-16 |
| rs1382472 | A | G | -0.1917 | 0.4041 | 0.4041 | 0.0307 | 4.47E-10 |
| rs139354822 | C | T | -0.6115 | 0.0296 | 0.0296 | 0.0975 | 3.51E-10 |
| rs1408945 | T | G | -0.3196 | 0.4243 | 0.4243 | 0.0304 | 8.33E-26 |
| rs1410222 | T | C | 0.2173 | 0.8166 | 0.1834 | 0.0388 | 2.17E-08 |
| rs141958336 | A | G | 0.7807 | 0.043 | 0.043 | 0.078 | 1.36E-23 |
| rs1422279 | T | C | 0.331 | 0.3864 | 0.3864 | 0.0309 | 1.05E-26 |
| rs1433121 | T | C | -0.228 | 0.6906 | 0.3094 | 0.0326 | 2.66E-12 |
| rs1436138 | G | A | -0.3119 | 0.3633 | 0.3633 | 0.0315 | 4.73E-23 |
| rs1437649 | A | G | -0.2189 | 0.2345 | 0.2345 | 0.0357 | 8.57E-10 |
| rs146550789 | C | T | 0.4824 | 0.0417 | 0.0417 | 0.0778 | 5.64E-10 |
| rs148140538 | T | C | -0.3252 | 0.0808 | 0.0808 | 0.0562 | 7.39E-09 |
| rs148401029 | A | C | -0.4623 | 0.0352 | 0.0352 | 0.0848 | 4.97E-08 |
| rs1493132 | C | T | 0.1766 | 0.3397 | 0.3397 | 0.0318 | 2.73E-08 |
| rs1544861 | C | T | -0.1969 | 0.6605 | 0.3395 | 0.0318 | 5.66E-10 |
| rs1551355 | T | C | 0.2098 | 0.2334 | 0.2334 | 0.0356 | 3.89E-09 |
| rs1565440 | A | G | 0.1746 | 0.3752 | 0.3752 | 0.0311 | 1.94E-08 |
| rs1575290 | T | C | 0.1973 | 0.4733 | 0.4733 | 0.0301 | 5.59E-11 |
| rs1623474 | T | C | 0.3827 | 0.3303 | 0.3303 | 0.0321 | 7.66E-33 |
| rs1630736 | T | C | -0.1706 | 0.465 | 0.465 | 0.0309 | 3.52E-08 |
| rs1664781 | A | G | 0.2643 | 0.6925 | 0.3075 | 0.0326 | 5.69E-16 |
| rs17010957 | C | T | 0.534 | 0.1463 | 0.1463 | 0.043 | 1.78E-35 |
| rs17035181 | G | T | -0.3074 | 0.1448 | 0.1448 | 0.0429 | 7.61E-13 |
| rs17080102 | C | G | -0.8085 | 0.0694 | 0.0694 | 0.0594 | 3.52E-42 |
| rs17245822 | C | A | 0.1899 | 0.3733 | 0.3733 | 0.0312 | 1.15E-09 |
| rs17249754 | A | G | -0.8446 | 0.1683 | 0.1683 | 0.0403 | 1.25E-97 |
| rs17257081 | G | A | -0.2274 | 0.1935 | 0.1935 | 0.0392 | 6.35E-09 |
| rs17562391 | T | C | 0.1967 | 0.4186 | 0.4186 | 0.0306 | 1.35E-10 |
| rs17608766 | C | T | 0.6903 | 0.1445 | 0.1445 | 0.0433 | 2.48E-57 |
| rs177551 | A | C | 0.373 | 0.1344 | 0.1344 | 0.0442 | 3.47E-17 |
| rs17760259 | C | T | 0.2654 | 0.4276 | 0.4276 | 0.0304 | 2.25E-18 |
| rs17762 | A | G | 0.4117 | 0.0777 | 0.0777 | 0.0571 | 5.60E-13 |
| rs17807723 | A | G | -0.2721 | 0.138 | 0.138 | 0.0443 | 8.43E-10 |
| rs17812022 | T | C | -0.3613 | 0.0958 | 0.0958 | 0.0525 | 5.65E-12 |
| rs1786345 | C | A | -0.2073 | 0.4338 | 0.4338 | 0.0307 | 1.34E-11 |
| rs1814951 | A | G | -0.3231 | 0.8785 | 0.1215 | 0.0466 | 3.91E-12 |
| rs1821002 | G | C | -0.3794 | 0.5892 | 0.4108 | 0.0307 | 5.19E-35 |
| rs1848994 | A | G | 0.2012 | 0.2828 | 0.2828 | 0.0334 | 1.79E-09 |
| rs1870735 | G | C | -0.206 | 0.5469 | 0.4531 | 0.0311 | 3.60E-11 |
| rs1871190 | T | G | 0.1954 | 0.3349 | 0.3349 | 0.0324 | 1.66E-09 |
| rs1882212 | G | A | -0.2753 | 0.2207 | 0.2207 | 0.0363 | 3.34E-14 |
| rs1882961 | T | C | 0.2443 | 0.3087 | 0.3087 | 0.0326 | 6.69E-14 |
| rs1889785 | A | G | 0.1782 | 0.4552 | 0.4552 | 0.0304 | 4.35E-09 |
| rs189267552 | A | T | -0.8664 | 0.0132 | 0.0132 | 0.139 | 4.55E-10 |
| rs1896326 | A | G | -0.2797 | 0.2291 | 0.2291 | 0.0371 | 4.40E-14 |
| rs1906672 | A | G | 0.2966 | 0.2319 | 0.2319 | 0.0358 | 1.20E-16 |
| rs1957563 | T | C | 0.3629 | 0.265 | 0.265 | 0.0342 | 2.32E-26 |
| rs1984195 | A | G | 0.2409 | 0.4887 | 0.4887 | 0.0303 | 1.77E-15 |
| rs1994158 | G | A | -0.2513 | 0.1807 | 0.1807 | 0.0391 | 1.23E-10 |
| rs2014408 | T | C | 0.5169 | 0.2087 | 0.2087 | 0.0373 | 1.26E-43 |
| rs2024385 | A | T | -0.2642 | 0.424 | 0.424 | 0.0306 | 5.88E-18 |
| rs2111557 | T | C | 0.1764 | 0.4675 | 0.4675 | 0.0302 | 5.22E-09 |
| rs2126474 | T | G | -0.2601 | 0.4125 | 0.4125 | 0.0306 | 1.87E-17 |
| rs2129869 | T | A | 0.2643 | 0.2222 | 0.2222 | 0.0361 | 2.44E-13 |
| rs2161967 | G | T | -0.2836 | 0.5721 | 0.4279 | 0.0307 | 2.87E-20 |
| rs2177843 | T | C | 0.4394 | 0.1505 | 0.1505 | 0.0432 | 2.80E-24 |
| rs2236295 | T | G | -0.3028 | 0.3978 | 0.3978 | 0.0309 | 1.04E-22 |
| rs2238787 | A | G | 0.2552 | 0.292 | 0.292 | 0.0332 | 1.45E-14 |
| rs2249105 | G | A | -0.2927 | 0.3679 | 0.3679 | 0.0313 | 7.63E-21 |
| rs2276153 | G | C | -0.3296 | 0.243 | 0.243 | 0.0351 | 6.56E-21 |
| rs2283500 | C | A | -0.3106 | 0.1102 | 0.1102 | 0.0481 | 1.08E-10 |
| rs2289124 | A | G | -0.308 | 0.1673 | 0.1673 | 0.0415 | 1.14E-13 |
| rs2291434 | T | G | -0.2622 | 0.5335 | 0.4665 | 0.0303 | 5.10E-18 |
| rs2291516 | A | G | 0.3708 | 0.103 | 0.103 | 0.0505 | 2.17E-13 |
| rs2353940 | C | T | 0.2075 | 0.2493 | 0.2493 | 0.0358 | 6.85E-09 |
| rs2354862 | C | A | -0.2507 | 0.3593 | 0.3593 | 0.0317 | 2.42E-15 |
| rs2384063 | T | C | 0.3266 | 0.7607 | 0.2393 | 0.0357 | 6.33E-20 |
| rs2392929 | G | T | 0.7507 | 0.2027 | 0.2027 | 0.0379 | 1.96E-87 |
| rs2423514 | G | A | -0.3011 | 0.4589 | 0.4589 | 0.0302 | 1.77E-23 |
| rs246973 | T | C | 0.2479 | 0.2882 | 0.2882 | 0.0335 | 1.45E-13 |
| rs2470004 | T | C | -0.3454 | 0.8175 | 0.1825 | 0.0392 | 1.28E-18 |
| rs2493134 | C | T | 0.3736 | 0.4071 | 0.4071 | 0.0309 | 1.10E-33 |
| rs2493296 | T | C | 0.4183 | 0.1425 | 0.1425 | 0.0442 | 3.14E-21 |
| rs2498323 | A | G | 0.3171 | 0.098 | 0.098 | 0.0517 | 8.51E-10 |
| rs2580350 | A | G | 0.1769 | 0.5609 | 0.4391 | 0.0307 | 8.39E-09 |
| rs2589218 | C | T | 0.2258 | 0.2703 | 0.2703 | 0.0339 | 2.54E-11 |
| rs2598 | G | A | -0.168 | 0.467 | 0.467 | 0.0303 | 2.87E-08 |
| rs2608029 | G | C | -0.1805 | 0.3347 | 0.3347 | 0.032 | 1.61E-08 |
| rs2610990 | G | A | 0.2903 | 0.7359 | 0.2641 | 0.0343 | 2.86E-17 |
| rs2627313 | T | C | 0.3208 | 0.4454 | 0.4454 | 0.0303 | 3.55E-26 |
| rs262986 | A | G | -0.2371 | 0.4704 | 0.4704 | 0.0305 | 7.67E-15 |
| rs263532 | C | T | -0.1798 | 0.4245 | 0.4245 | 0.0307 | 4.72E-09 |
| rs2643826 | T | C | 0.4473 | 0.4505 | 0.4505 | 0.0306 | 1.74E-48 |
| rs2652812 | T | C | -0.2516 | 0.7544 | 0.2456 | 0.0353 | 1.03E-12 |
| rs268263 | A | T | 0.5938 | 0.7498 | 0.2502 | 0.0353 | 1.77E-63 |
| rs2689690 | T | C | -0.2702 | 0.3678 | 0.3678 | 0.0316 | 1.15E-17 |
| rs2724377 | G | A | -0.1938 | 0.4697 | 0.4697 | 0.0301 | 1.29E-10 |
| rs2744139 | C | T | -0.2369 | 0.2376 | 0.2376 | 0.0355 | 2.48E-11 |
| rs2745599 | G | A | -0.2164 | 0.448 | 0.448 | 0.0317 | 8.96E-12 |
| rs2760748 | A | T | 0.3626 | 0.0981 | 0.0981 | 0.0509 | 1.05E-12 |
| rs2776037 | C | T | 0.1851 | 0.5849 | 0.4151 | 0.0309 | 2.15E-09 |
| rs2801008 | G | T | 0.1876 | 0.3183 | 0.3183 | 0.0324 | 7.37E-09 |
| rs2815063 | A | C | 0.2755 | 0.1315 | 0.1315 | 0.0458 | 1.76E-09 |
| rs2833834 | A | C | 0.2177 | 0.2765 | 0.2765 | 0.0338 | 1.22E-10 |
| rs28429256 | A | G | 0.215 | 0.3342 | 0.3342 | 0.0325 | 3.89E-11 |
| rs2853736 | G | T | -0.2368 | 0.3057 | 0.3057 | 0.0331 | 8.34E-13 |
| rs28572357 | C | A | 0.2733 | 0.3977 | 0.3977 | 0.0308 | 6.34E-19 |
| rs28578714 | C | T | -0.2066 | 0.3938 | 0.3938 | 0.0327 | 2.53E-10 |
| rs28650790 | T | C | 0.2287 | 0.1891 | 0.1891 | 0.0387 | 3.30E-09 |
| rs28688791 | C | T | 0.3222 | 0.1982 | 0.1982 | 0.038 | 2.34E-17 |
| rs28866311 | G | T | 0.2762 | 0.4737 | 0.4737 | 0.0302 | 5.45E-20 |
| rs2904315 | G | A | 0.2081 | 0.6869 | 0.3131 | 0.0325 | 1.58E-10 |
| rs2913920 | T | C | 0.2418 | 0.765 | 0.235 | 0.0359 | 1.62E-11 |
| rs2957688 | A | G | 0.3472 | 0.4707 | 0.4707 | 0.0304 | 2.74E-30 |
| rs3098186 | T | C | -0.2422 | 0.5156 | 0.4844 | 0.0303 | 1.41E-15 |
| rs3104552 | C | T | -0.2449 | 0.4393 | 0.4393 | 0.0303 | 6.31E-16 |
| rs34025993 | G | A | -0.223 | 0.586 | 0.414 | 0.0308 | 4.71E-13 |
| rs34072724 | A | G | -0.2422 | 0.4889 | 0.4889 | 0.0303 | 1.37E-15 |
| rs34079867 | T | C | 0.1992 | 0.266 | 0.266 | 0.0354 | 1.78E-08 |
| rs34130368 | T | G | -0.3016 | 0.117 | 0.117 | 0.0497 | 1.28E-09 |
| rs34413141 | A | T | -0.3531 | 0.1822 | 0.1822 | 0.0393 | 2.47E-19 |
| rs34487963 | A | C | -0.8819 | 0.0185 | 0.0185 | 0.1244 | 1.35E-12 |
| rs34518929 | A | G | -0.22 | 0.2623 | 0.2623 | 0.0345 | 1.79E-10 |
| rs34535756 | T | C | 0.478 | 0.0394 | 0.0394 | 0.0786 | 1.18E-09 |
| rs34727427 | C | T | 0.2353 | 0.3168 | 0.3168 | 0.0324 | 4.02E-13 |
| rs34917849 | C | G | 0.3124 | 0.1268 | 0.1268 | 0.0454 | 5.97E-12 |
| rs34941092 | A | G | -0.3225 | 0.1498 | 0.1498 | 0.0425 | 3.23E-14 |
| rs35098810 | C | A | -0.1967 | 0.2317 | 0.2317 | 0.0356 | 3.20E-08 |
| rs35413927 | G | A | 0.3002 | 0.3054 | 0.3054 | 0.0328 | 5.25E-20 |
| rs35444 | G | A | -0.4368 | 0.3862 | 0.3862 | 0.031 | 3.47E-45 |
| rs35680304 | T | C | 0.2694 | 0.5929 | 0.4071 | 0.031 | 3.76E-18 |
| rs35783704 | A | G | -0.4619 | 0.1042 | 0.1042 | 0.0507 | 8.81E-20 |
| rs365990 | G | A | -0.225 | 0.3658 | 0.3658 | 0.0312 | 5.95E-13 |
| rs3735533 | C | T | 0.91 | 0.9257 | 0.0743 | 0.0577 | 5.29E-56 |
| rs3764400 | C | T | -0.3748 | 0.1365 | 0.1365 | 0.0445 | 3.69E-17 |
| rs3772219 | C | A | -0.2733 | 0.3176 | 0.3176 | 0.0324 | 3.10E-17 |
| rs3802517 | A | T | 0.2527 | 0.4618 | 0.4618 | 0.0301 | 4.65E-17 |
| rs3807925 | G | A | 0.1859 | 0.3504 | 0.3504 | 0.0319 | 5.39E-09 |
| rs3815460 | G | C | 0.285 | 0.1024 | 0.1024 | 0.05 | 1.21E-08 |
| rs3819532 | C | T | 0.1875 | 0.6087 | 0.3913 | 0.0306 | 9.44E-10 |
| rs3828282 | G | C | -0.1857 | 0.5721 | 0.4279 | 0.0318 | 5.29E-09 |
| rs3845811 | G | C | 0.2942 | 0.4339 | 0.4339 | 0.0309 | 1.88E-21 |
| rs3860770 | A | G | -0.2663 | 0.2916 | 0.2916 | 0.0333 | 1.20E-15 |
| rs3918226 | T | C | 0.664 | 0.0811 | 0.0811 | 0.0575 | 8.46E-31 |
| rs3950627 | A | C | 0.1851 | 0.531 | 0.469 | 0.0308 | 1.82E-09 |
| rs3980686 | T | G | -0.4998 | 0.1075 | 0.1075 | 0.0487 | 1.03E-24 |
| rs404100 | T | C | 0.1935 | 0.4513 | 0.4513 | 0.0303 | 1.68E-10 |
| rs4143175 | C | T | -0.2187 | 0.7591 | 0.2409 | 0.0352 | 5.10E-10 |
| rs42032 | A | G | -0.3231 | 0.2641 | 0.2641 | 0.0345 | 7.39E-21 |
| rs4245599 | G | A | 0.1794 | 0.5416 | 0.4584 | 0.0305 | 4.03E-09 |
| rs4260863 | G | C | -0.1911 | 0.3837 | 0.3837 | 0.0314 | 1.17E-09 |
| rs4274337 | G | A | 0.2968 | 0.8303 | 0.1697 | 0.0406 | 2.48E-13 |
| rs4284362 | A | C | -0.2256 | 0.7181 | 0.2819 | 0.0338 | 2.61E-11 |
| rs4408839 | G | A | 0.2301 | 0.2567 | 0.2567 | 0.0345 | 2.42E-11 |
| rs4440615 | A | G | -0.2201 | 0.6321 | 0.3679 | 0.0312 | 1.87E-12 |
| rs4499560 | T | A | 0.2199 | 0.6829 | 0.3171 | 0.0326 | 1.46E-11 |
| rs4511593 | T | C | -0.2881 | 0.6528 | 0.3472 | 0.0318 | 1.28E-19 |
| rs4553000 | T | C | -0.2035 | 0.5141 | 0.4859 | 0.03 | 1.09E-11 |
| rs4577304 | C | T | 0.1767 | 0.4767 | 0.4767 | 0.0302 | 4.99E-09 |
| rs4606697 | A | G | -0.3196 | 0.1041 | 0.1041 | 0.0523 | 9.71E-10 |
| rs4651224 | T | C | 0.1986 | 0.4474 | 0.4474 | 0.0306 | 9.00E-11 |
| rs4734868 | G | A | 0.1844 | 0.3303 | 0.3303 | 0.0321 | 9.22E-09 |
| rs4775769 | G | T | 0.4162 | 0.9055 | 0.0945 | 0.0517 | 7.76E-16 |
| rs4784541 | C | T | 0.2015 | 0.5252 | 0.4748 | 0.0307 | 4.93E-11 |
| rs483071 | T | C | 0.2709 | 0.6248 | 0.3752 | 0.0313 | 5.09E-18 |
| rs4834792 | A | T | 0.1973 | 0.4796 | 0.4796 | 0.0303 | 7.24E-11 |
| rs4838021 | T | C | -0.3009 | 0.1289 | 0.1289 | 0.0453 | 3.13E-11 |
| rs4873492 | T | C | 0.3431 | 0.1724 | 0.1724 | 0.0403 | 1.61E-17 |
| rs4876133 | C | G | 0.22 | 0.711 | 0.289 | 0.0336 | 6.23E-11 |
| rs488834 | T | C | -0.3799 | 0.7645 | 0.2355 | 0.0365 | 2.35E-25 |
| rs4888408 | A | G | 0.3653 | 0.5855 | 0.4145 | 0.0307 | 1.42E-32 |
| rs4925159 | A | G | 0.2174 | 0.4246 | 0.4246 | 0.0305 | 9.66E-13 |
| rs4926499 | C | G | 0.2965 | 0.8263 | 0.1737 | 0.0438 | 1.33E-11 |
| rs4932373 | C | A | 0.635 | 0.3258 | 0.3258 | 0.0328 | 2.49E-83 |
| rs4952609 | G | A | -0.2124 | 0.2561 | 0.2561 | 0.0347 | 9.60E-10 |
| rs4955575 | C | A | -0.2158 | 0.2539 | 0.2539 | 0.0348 | 5.63E-10 |
| rs4957026 | G | A | -0.1982 | 0.6601 | 0.3399 | 0.0323 | 8.12E-10 |
| rs4961293 | T | C | 0.2268 | 0.4513 | 0.4513 | 0.0303 | 7.35E-14 |
| rs4980379 | T | C | 0.5764 | 0.3719 | 0.3719 | 0.032 | 2.47E-72 |
| rs509564 | T | C | 0.2622 | 0.226 | 0.226 | 0.0363 | 5.08E-13 |
| rs509833 | G | A | -0.329 | 0.8614 | 0.1386 | 0.044 | 7.08E-14 |
| rs55732192 | T | G | -0.3358 | 0.0947 | 0.0947 | 0.0521 | 1.15E-10 |
| rs55924432 | T | C | 0.2651 | 0.401 | 0.401 | 0.0317 | 5.70E-17 |
| rs55944332 | G | A | 0.2613 | 0.2368 | 0.2368 | 0.0355 | 1.79E-13 |
| rs56288724 | G | A | 0.2178 | 0.4169 | 0.4169 | 0.031 | 2.01E-12 |
| rs56407827 | T | C | 0.3603 | 0.2687 | 0.2687 | 0.034 | 2.78E-26 |
| rs571689 | T | C | 0.228 | 0.5196 | 0.4804 | 0.0304 | 6.77E-14 |
| rs573455 | G | A | -0.1994 | 0.539 | 0.461 | 0.0303 | 4.77E-11 |
| rs5742643 | C | T | 0.2233 | 0.7513 | 0.2487 | 0.0349 | 1.53E-10 |
| rs57786342 | A | G | 0.2317 | 0.2059 | 0.2059 | 0.0374 | 5.63E-10 |
| rs57866767 | C | T | -0.4501 | 0.4322 | 0.4322 | 0.0304 | 1.14E-49 |
| rs57946343 | C | T | -0.716 | 0.1473 | 0.1473 | 0.0426 | 2.10E-63 |
| rs59980837 | T | G | 1.0997 | 0.0178 | 0.0178 | 0.1163 | 3.32E-21 |
| rs60138042 | G | C | -0.3395 | 0.0645 | 0.0645 | 0.0619 | 4.14E-08 |
| rs60191654 | G | A | 0.2382 | 0.1882 | 0.1882 | 0.0385 | 5.88E-10 |
| rs6026578 | G | C | 0.185 | 0.6269 | 0.3731 | 0.0316 | 4.59E-09 |
| rs6026744 | T | A | 0.7131 | 0.1229 | 0.1229 | 0.0461 | 7.00E-54 |
| rs6029756 | A | G | -0.2712 | 0.3225 | 0.3225 | 0.033 | 1.88E-16 |
| rs6031431 | G | A | 0.2617 | 0.4624 | 0.4624 | 0.0304 | 7.05E-18 |
| rs60444686 | A | G | 0.5905 | 0.0406 | 0.0406 | 0.0782 | 4.42E-14 |
| rs604723 | C | T | 0.655 | 0.7244 | 0.2756 | 0.0339 | 2.55E-83 |
| rs6054139 | A | G | 0.2094 | 0.606 | 0.394 | 0.0306 | 8.23E-12 |
| rs6058088 | G | T | -0.2832 | 0.1561 | 0.1561 | 0.0417 | 1.14E-11 |
| rs6062324 | A | G | -0.3294 | 0.2364 | 0.2364 | 0.0363 | 1.18E-19 |
| rs6078093 | A | G | -0.1849 | 0.428 | 0.428 | 0.0304 | 1.20E-09 |
| rs6090907 | A | G | -0.3854 | 0.147 | 0.147 | 0.0425 | 1.29E-19 |
| rs60909079 | C | G | -0.2114 | 0.2492 | 0.2492 | 0.0351 | 1.73E-09 |
| rs60991988 | G | T | -0.3789 | 0.1069 | 0.1069 | 0.0498 | 2.82E-14 |
| rs6108787 | G | T | 0.4274 | 0.4704 | 0.4704 | 0.03 | 5.38E-46 |
| rs61772592 | G | A | 0.3181 | 0.1255 | 0.1255 | 0.0455 | 2.86E-12 |
| rs61917655 | T | C | 0.3427 | 0.1014 | 0.1014 | 0.0514 | 2.68E-11 |
| rs62047964 | T | C | 0.5115 | 0.0622 | 0.0622 | 0.0686 | 9.29E-14 |
| rs62076622 | G | A | -0.2363 | 0.1987 | 0.1987 | 0.0377 | 3.79E-10 |
| rs62082230 | A | T | -0.1884 | 0.2773 | 0.2773 | 0.0345 | 4.69E-08 |
| rs62170470 | C | T | -0.1972 | 0.3983 | 0.3983 | 0.0321 | 7.68E-10 |
| rs62309747 | A | G | -0.2244 | 0.4734 | 0.4734 | 0.0304 | 1.59E-13 |
| rs62512914 | G | A | -0.2066 | 0.4152 | 0.4152 | 0.0306 | 1.42E-11 |
| rs6271 | T | C | -0.5547 | 0.0735 | 0.0735 | 0.0611 | 1.18E-19 |
| rs641620 | C | T | 0.3193 | 0.1453 | 0.1453 | 0.044 | 3.74E-13 |
| rs6438857 | C | T | -0.2736 | 0.4226 | 0.4226 | 0.0305 | 3.13E-19 |
| rs6445583 | A | G | 0.2774 | 0.7465 | 0.2535 | 0.0349 | 1.90E-15 |
| rs6452769 | A | G | -0.3143 | 0.2053 | 0.2053 | 0.0377 | 7.82E-17 |
| rs6490019 | G | A | 0.2897 | 0.6204 | 0.3796 | 0.0309 | 6.61E-21 |
| rs6504213 | C | T | 0.2982 | 0.5818 | 0.4182 | 0.0312 | 1.25E-21 |
| rs6540119 | T | A | -0.2016 | 0.666 | 0.334 | 0.0322 | 3.93E-10 |
| rs6562778 | G | A | -0.178 | 0.5411 | 0.4589 | 0.0304 | 4.95E-09 |
| rs658780 | G | T | 0.2028 | 0.2553 | 0.2553 | 0.0347 | 5.29E-09 |
| rs665445 | A | C | -0.1909 | 0.2794 | 0.2794 | 0.0334 | 1.15E-08 |
| rs66864335 | A | G | -0.3963 | 0.2211 | 0.2211 | 0.0365 | 1.79E-27 |
| rs6699618 | G | C | -0.9115 | 0.1599 | 0.1599 | 0.041 | 1.68E-109 |
| rs6731373 | A | G | 0.1913 | 0.3492 | 0.3492 | 0.0326 | 4.18E-09 |
| rs6732123 | C | G | -0.1737 | 0.4174 | 0.4174 | 0.0307 | 1.52E-08 |
| rs6737318 | G | A | -0.2348 | 0.2218 | 0.2218 | 0.0364 | 1.13E-10 |
| rs67617547 | G | C | -0.1799 | 0.3303 | 0.3303 | 0.0322 | 2.39E-08 |
| rs6771917 | C | T | 0.3793 | 0.7523 | 0.2477 | 0.0355 | 1.39E-26 |
| rs67885470 | T | C | -0.2087 | 0.2094 | 0.2094 | 0.038 | 4.12E-08 |
| rs6788907 | A | G | 0.221 | 0.2682 | 0.2682 | 0.0339 | 7.31E-11 |
| rs6788984 | G | A | -0.2999 | 0.1437 | 0.1437 | 0.0432 | 3.81E-12 |
| rs68085857 | T | C | 0.274 | 0.234 | 0.234 | 0.0357 | 1.68E-14 |
| rs68115553 | G | A | 0.6445 | 0.0199 | 0.0199 | 0.1143 | 1.74E-08 |
| rs6870654 | C | T | -0.2136 | 0.2546 | 0.2546 | 0.0347 | 7.58E-10 |
| rs6892983 | A | C | 0.3427 | 0.4022 | 0.4022 | 0.0307 | 7.11E-29 |
| rs6921291 | T | C | 0.3575 | 0.1907 | 0.1907 | 0.0385 | 1.58E-20 |
| rs6957161 | G | A | -0.2064 | 0.7382 | 0.2618 | 0.0345 | 2.20E-09 |
| rs6961048 | G | C | 0.5304 | 0.104 | 0.104 | 0.0497 | 1.43E-26 |
| rs6986368 | T | A | 0.2132 | 0.3274 | 0.3274 | 0.0329 | 9.62E-11 |
| rs7012866 | G | T | 0.2325 | 0.5009 | 0.4991 | 0.0301 | 1.21E-14 |
| rs702395 | T | C | 0.2318 | 0.4369 | 0.4369 | 0.0305 | 3.24E-14 |
| rs7026176 | T | G | -0.1869 | 0.5118 | 0.4882 | 0.0299 | 4.01E-10 |
| rs7045409 | A | T | -0.1862 | 0.3669 | 0.3669 | 0.0313 | 2.55E-09 |
| rs708117 | A | G | 0.2874 | 0.5203 | 0.4797 | 0.0302 | 1.59E-21 |
| rs7093894 | A | C | 0.236 | 0.1512 | 0.1512 | 0.0427 | 3.16E-08 |
| rs7107356 | G | A | 0.4598 | 0.5041 | 0.4959 | 0.0301 | 1.63E-52 |
| rs7134440 | T | C | 0.4788 | 0.0822 | 0.0822 | 0.0562 | 1.58E-17 |
| rs7134677 | T | C | -0.3851 | 0.2978 | 0.2978 | 0.0332 | 4.46E-31 |
| rs7154723 | A | G | 0.253 | 0.385 | 0.385 | 0.0309 | 2.72E-16 |
| rs7186298 | T | C | -0.2315 | 0.4295 | 0.4295 | 0.0302 | 1.88E-14 |
| rs7198817 | A | C | -0.1824 | 0.6323 | 0.3677 | 0.0313 | 5.99E-09 |
| rs7211535 | G | A | 0.1779 | 0.5236 | 0.4764 | 0.0304 | 4.61E-09 |
| rs7213273 | A | G | -0.4 | 0.655 | 0.345 | 0.0315 | 6.24E-37 |
| rs7236548 | A | C | 0.3431 | 0.1848 | 0.1848 | 0.0388 | 8.51E-19 |
| rs7255933 | A | G | 0.2306 | 0.2574 | 0.2574 | 0.0345 | 2.44E-11 |
| rs72683923 | C | T | -0.9587 | 0.0212 | 0.0212 | 0.1101 | 3.08E-18 |
| rs72719160 | T | A | 0.2243 | 0.3171 | 0.3171 | 0.0324 | 4.34E-12 |
| rs72742507 | T | C | -0.2053 | 0.2999 | 0.2999 | 0.0328 | 3.80E-10 |
| rs7278003 | C | T | 0.1876 | 0.5622 | 0.4378 | 0.0304 | 6.63E-10 |
| rs72847885 | G | A | -0.2413 | 0.337 | 0.337 | 0.0318 | 3.08E-14 |
| rs72931748 | G | A | -0.3967 | 0.0985 | 0.0985 | 0.0529 | 6.40E-14 |
| rs73046792 | A | G | -0.3554 | 0.1588 | 0.1588 | 0.0426 | 7.23E-17 |
| rs73049928 | G | A | 0.2382 | 0.1939 | 0.1939 | 0.0392 | 1.20E-09 |
| rs7306710 | C | T | 0.2429 | 0.519 | 0.481 | 0.0303 | 1.02E-15 |
| rs73075659 | G | A | -0.3962 | 0.3346 | 0.3346 | 0.0321 | 5.52E-35 |
| rs73103937 | C | T | -0.2051 | 0.268 | 0.268 | 0.0344 | 2.36E-09 |
| rs7310615 | G | C | -0.585 | 0.5184 | 0.4816 | 0.0306 | 1.32E-81 |
| rs7331680 | T | G | 0.4101 | 0.1491 | 0.1491 | 0.0423 | 3.35E-22 |
| rs73727605 | A | G | 0.3616 | 0.0663 | 0.0663 | 0.0623 | 6.60E-09 |
| rs73855810 | A | G | 0.2732 | 0.1406 | 0.1406 | 0.0434 | 3.04E-10 |
| rs7395791 | A | G | -0.2162 | 0.4419 | 0.4419 | 0.0308 | 2.19E-12 |
| rs74048190 | C | T | 0.4404 | 0.0478 | 0.0478 | 0.0757 | 6.07E-09 |
| rs740746 | A | G | 0.4557 | 0.7318 | 0.2682 | 0.0342 | 1.42E-40 |
| rs743395 | T | C | 0.2597 | 0.3834 | 0.3834 | 0.0317 | 2.55E-16 |
| rs7439567 | T | C | 0.2537 | 0.4106 | 0.4106 | 0.0309 | 2.31E-16 |
| rs74538877 | C | G | -0.3855 | 0.0557 | 0.0557 | 0.0707 | 4.97E-08 |
| rs7463212 | A | T | -0.2753 | 0.5445 | 0.4555 | 0.0305 | 1.81E-19 |
| rs7491248 | A | G | 0.2163 | 0.2239 | 0.2239 | 0.0362 | 2.37E-09 |
| rs7493678 | T | A | 0.189 | 0.3486 | 0.3486 | 0.0316 | 2.31E-09 |
| rs75016974 | T | C | -0.2513 | 0.1423 | 0.1423 | 0.0439 | 1.05E-08 |
| rs7514579 | C | A | -0.2243 | 0.2288 | 0.2288 | 0.0361 | 5.45E-10 |
| rs75461554 | T | C | -0.3016 | 0.2007 | 0.2007 | 0.0377 | 1.18E-15 |
| rs7555285 | C | G | 0.2294 | 0.8011 | 0.1989 | 0.0376 | 1.05E-09 |
| rs75672964 | T | C | 0.5885 | 0.0418 | 0.0418 | 0.0839 | 2.35E-12 |
| rs75961402 | A | G | 0.2659 | 0.1534 | 0.1534 | 0.0418 | 1.95E-10 |
| rs7615099 | G | A | -0.1891 | 0.3325 | 0.3325 | 0.0321 | 3.90E-09 |
| rs7618284 | C | G | -0.1891 | 0.3394 | 0.3394 | 0.0331 | 1.10E-08 |
| rs76443575 | C | G | -0.5233 | 0.0359 | 0.0359 | 0.0816 | 1.40E-10 |
| rs76452347 | T | C | -0.2974 | 0.205 | 0.205 | 0.0397 | 7.13E-14 |
| rs76719272 | T | C | -0.2738 | 0.1312 | 0.1312 | 0.0461 | 2.97E-09 |
| rs7683728 | T | C | -0.3654 | 0.5312 | 0.4688 | 0.0304 | 2.43E-33 |
| rs7703560 | G | A | 0.2246 | 0.2998 | 0.2998 | 0.0333 | 1.51E-11 |
| rs7722243 | A | G | -0.2048 | 0.5043 | 0.4957 | 0.0302 | 1.21E-11 |
| rs7725413 | T | C | -0.1985 | 0.7699 | 0.2301 | 0.0359 | 3.07E-08 |
| rs77375686 | G | A | 0.3467 | 0.1117 | 0.1117 | 0.0485 | 8.38E-13 |
| rs7744902 | A | G | -0.4088 | 0.0766 | 0.0766 | 0.0593 | 5.64E-12 |
| rs7763558 | A | G | 0.3363 | 0.3241 | 0.3241 | 0.0321 | 1.17E-25 |
| rs7765526 | G | A | -0.201 | 0.5367 | 0.4633 | 0.0307 | 5.88E-11 |
| rs778124 | A | G | 0.2965 | 0.3736 | 0.3736 | 0.0311 | 1.45E-21 |
| rs77924615 | A | G | -0.4081 | 0.1986 | 0.1986 | 0.039 | 1.12E-25 |
| rs7796 | G | C | -0.3385 | 0.4886 | 0.4886 | 0.0314 | 5.00E-27 |
| rs7821832 | G | T | -0.4222 | 0.2553 | 0.2553 | 0.0348 | 6.67E-34 |
| rs7844887 | A | G | 0.2662 | 0.2208 | 0.2208 | 0.0363 | 2.40E-13 |
| rs78474310 | G | A | 0.4699 | 0.0448 | 0.0448 | 0.0734 | 1.51E-10 |
| rs78648104 | C | T | 0.4287 | 0.0925 | 0.0925 | 0.0541 | 2.36E-15 |
| rs786923 | T | C | -0.3082 | 0.6239 | 0.3761 | 0.031 | 2.82E-23 |
| rs78998485 | G | C | 0.2449 | 0.2557 | 0.2557 | 0.0346 | 1.48E-12 |
| rs79069610 | C | T | 0.4005 | 0.05 | 0.05 | 0.0727 | 3.68E-08 |
| rs7912283 | A | G | -0.2144 | 0.6468 | 0.3532 | 0.0322 | 2.94E-11 |
| rs7926110 | G | T | -0.2603 | 0.3267 | 0.3267 | 0.0321 | 5.71E-16 |
| rs79384779 | T | C | 0.3179 | 0.1512 | 0.1512 | 0.0428 | 1.08E-13 |
| rs79539362 | C | T | -0.4003 | 0.1008 | 0.1008 | 0.0504 | 2.09E-15 |
| rs7963801 | C | T | 0.2362 | 0.5779 | 0.4221 | 0.0311 | 2.87E-14 |
| rs79782817 | T | G | 0.5324 | 0.1027 | 0.1027 | 0.0499 | 1.43E-26 |
| rs7980644 | G | A | -0.2641 | 0.8334 | 0.1666 | 0.0404 | 6.30E-11 |
| rs79930761 | T | C | -0.4688 | 0.0872 | 0.0872 | 0.0559 | 4.90E-17 |
| rs8003103 | A | G | -0.1755 | 0.3447 | 0.3447 | 0.0319 | 3.60E-08 |
| rs8030856 | G | C | 0.1764 | 0.3953 | 0.3953 | 0.031 | 1.21E-08 |
| rs8044992 | C | T | -0.2138 | 0.2877 | 0.2877 | 0.0331 | 1.07E-10 |
| rs8054587 | C | T | -0.1665 | 0.4728 | 0.4728 | 0.0302 | 3.41E-08 |
| rs8079811 | G | C | 0.2101 | 0.6521 | 0.3479 | 0.0325 | 1.03E-10 |
| rs8113613 | T | C | -0.2334 | 0.1813 | 0.1813 | 0.0398 | 4.59E-09 |
| rs8125763 | A | C | 0.1761 | 0.4717 | 0.4717 | 0.0301 | 4.84E-09 |
| rs8142376 | T | C | 0.1676 | 0.491 | 0.491 | 0.03 | 2.19E-08 |
| rs8180684 | T | C | 0.2134 | 0.2896 | 0.2896 | 0.0335 | 1.80E-10 |
| rs848445 | C | T | 0.2025 | 0.7149 | 0.2851 | 0.0339 | 2.28E-09 |
| rs869396 | A | C | -0.2115 | 0.4659 | 0.4659 | 0.0305 | 4.12E-12 |
| rs871004 | A | G | 0.2336 | 0.3481 | 0.3481 | 0.0317 | 1.65E-13 |
| rs8904 | A | G | 0.3061 | 0.3678 | 0.3678 | 0.0314 | 1.71E-22 |
| rs908951 | T | C | -0.2261 | 0.4378 | 0.4378 | 0.0315 | 7.14E-13 |
| rs927315 | T | C | 0.1689 | 0.4713 | 0.4713 | 0.0303 | 2.44E-08 |
| rs9285476 | G | C | -0.1844 | 0.2929 | 0.2929 | 0.0333 | 3.07E-08 |
| rs9302885 | G | A | -0.2242 | 0.5548 | 0.4452 | 0.0302 | 1.03E-13 |
| rs9327297 | G | C | -0.2747 | 0.3324 | 0.3324 | 0.0319 | 8.07E-18 |
| rs9349379 | G | A | -0.2664 | 0.407 | 0.407 | 0.0312 | 1.31E-17 |
| rs9361836 | T | C | 0.2196 | 0.3172 | 0.3172 | 0.0324 | 1.25E-11 |
| rs9368222 | A | C | 0.2281 | 0.2688 | 0.2688 | 0.0339 | 1.84E-11 |
| rs9401913 | A | G | 0.5202 | 0.4387 | 0.4387 | 0.0305 | 3.66E-65 |
| rs9486916 | T | C | 0.2657 | 0.1979 | 0.1979 | 0.0385 | 5.42E-12 |
| rs9507885 | T | C | -0.3208 | 0.0953 | 0.0953 | 0.0542 | 3.23E-09 |
| rs9508495 | T | C | -0.3557 | 0.7565 | 0.2435 | 0.0353 | 6.34E-24 |
| rs9526707 | A | G | -0.2039 | 0.3216 | 0.3216 | 0.0323 | 2.77E-10 |
| rs9549627 | A | G | 0.2846 | 0.1175 | 0.1175 | 0.05 | 1.25E-08 |
| rs961764 | G | C | 0.1909 | 0.5746 | 0.4254 | 0.0305 | 3.74E-10 |
| rs9848170 | C | G | 0.3231 | 0.597 | 0.403 | 0.0307 | 7.01E-26 |
| rs9857362 | C | A | -0.1727 | 0.4709 | 0.4709 | 0.0306 | 1.62E-08 |
| rs9869437 | A | C | -0.2001 | 0.3523 | 0.3523 | 0.0318 | 3.22E-10 |
| rs9876694 | T | C | 0.4713 | 0.0584 | 0.0584 | 0.0651 | 4.64E-13 |
| rs9880098 | A | G | 0.3081 | 0.3946 | 0.3946 | 0.0308 | 1.59E-23 |
| rs9886665 | C | T | -0.2048 | 0.7329 | 0.2671 | 0.0343 | 2.47E-09 |
| rs9897429 | A | G | 0.2645 | 0.52 | 0.48 | 0.0319 | 1.19E-16 |
| rs9899540 | T | A | -0.2011 | 0.6001 | 0.3999 | 0.0316 | 1.87E-10 |
| rs9918876 | A | C | -0.2975 | 0.1037 | 0.1037 | 0.0498 | 2.28E-09 |

a The variants together explain 8.0% of the variation in Systolic Blood Pressure (R2 = 0.080; F (TOTAL) = 143.439).

b Increase in Systolic Blood Pressure in per effect allele.

c Effect Allele Frequency

d Minor Allele Frequency

| Characteristics of the single nucleotide polymorphisms (SNP) used as instrumental variables for Diastolic Blood Pressurea |
| --- |

| SNP | Effect Allele | Other Allele | Effect (BETA)b | EAFc | MAFd | Standard Error | P-Value |
| --- | --- | --- | --- | --- | --- | --- | --- |
| rs10048404 | T | C | -0.1096 | 0.3694 | 0.3694 | 0.0183 | 2.00E-09 |
| rs10054208 | T | C | 0.1187 | 0.3617 | 0.3617 | 0.0185 | 1.49E-10 |
| rs10062049 | T | C | 0.2208 | 0.1359 | 0.1359 | 0.0255 | 4.50E-18 |
| rs1006545 | T | G | 0.3633 | 0.8875 | 0.1125 | 0.0275 | 7.96E-40 |
| rs10069690 | T | C | 0.1615 | 0.2581 | 0.2581 | 0.021 | 1.42E-14 |
| rs10087280 | G | A | -0.1381 | 0.1683 | 0.1683 | 0.0232 | 2.54E-09 |
| rs10164193 | G | T | 0.2196 | 0.0777 | 0.0777 | 0.0327 | 1.87E-11 |
| rs10279432 | A | C | 0.1178 | 0.6234 | 0.3766 | 0.018 | 5.73E-11 |
| rs1035673 | C | T | -0.1625 | 0.6032 | 0.3968 | 0.0176 | 3.00E-20 |
| rs1039897 | A | G | -0.1085 | 0.6503 | 0.3497 | 0.0183 | 3.26E-09 |
| rs1044608 | G | C | 0.2018 | 0.0767 | 0.0767 | 0.0339 | 2.76E-09 |
| rs1044822 | T | C | -0.1334 | 0.1488 | 0.1488 | 0.0243 | 4.14E-08 |
| rs10490923 | A | G | 0.1533 | 0.1257 | 0.1257 | 0.0262 | 5.02E-09 |
| rs10491713 | T | G | -0.1219 | 0.1977 | 0.1977 | 0.0217 | 2.05E-08 |
| rs1049212 | G | A | 0.1788 | 0.5694 | 0.4306 | 0.0175 | 1.30E-24 |
| rs10493408 | A | C | 0.1584 | 0.1331 | 0.1331 | 0.0255 | 5.09E-10 |
| rs10500932 | A | G | 0.2784 | 0.0743 | 0.0743 | 0.0333 | 5.79E-17 |
| rs10759697 | A | G | 0.1308 | 0.4906 | 0.4906 | 0.0173 | 3.93E-14 |
| rs10776752 | T | G | 0.4573 | 0.0805 | 0.0805 | 0.033 | 1.25E-43 |
| rs10804330 | C | T | -0.1331 | 0.4329 | 0.4329 | 0.0176 | 4.60E-14 |
| rs10832586 | C | A | 0.3083 | 0.2016 | 0.2016 | 0.0216 | 2.53E-46 |
| rs10838702 | T | G | 0.2375 | 0.3875 | 0.3875 | 0.0178 | 1.27E-40 |
| rs10873612 | T | C | -0.1096 | 0.5961 | 0.4039 | 0.0179 | 9.51E-10 |
| rs10941043 | G | T | 0.1269 | 0.2906 | 0.2906 | 0.019 | 2.52E-11 |
| rs10980408 | C | T | 0.3745 | 0.0358 | 0.0358 | 0.0477 | 4.17E-15 |
| rs11021221 | A | T | -0.1877 | 0.1668 | 0.1668 | 0.0233 | 6.93E-16 |
| rs11070245 | G | T | 0.1287 | 0.5321 | 0.4679 | 0.0174 | 1.57E-13 |
| rs11077961 | G | A | -0.1073 | 0.3676 | 0.3676 | 0.0186 | 8.55E-09 |
| rs11108209 | C | T | 0.1901 | 0.0932 | 0.0932 | 0.03 | 2.40E-10 |
| rs11112548 | T | A | -0.2742 | 0.0444 | 0.0444 | 0.0443 | 5.80E-10 |
| rs11130602 | A | G | 0.1467 | 0.4427 | 0.4427 | 0.0175 | 4.27E-17 |
| rs11141731 | T | C | -0.1258 | 0.228 | 0.228 | 0.0207 | 1.31E-09 |
| rs1114347 | G | A | 0.1792 | 0.4823 | 0.4823 | 0.0173 | 3.32E-25 |
| rs11145807 | G | A | -0.155 | 0.5942 | 0.4058 | 0.0184 | 4.10E-17 |
| rs11153590 | A | G | -0.1145 | 0.3831 | 0.3831 | 0.0178 | 1.12E-10 |
| rs11153730 | C | T | -0.1551 | 0.4906 | 0.4906 | 0.0173 | 2.57E-19 |
| rs11187838 | A | G | -0.2781 | 0.4321 | 0.4321 | 0.0174 | 2.55E-57 |
| rs11191580 | C | T | -0.5071 | 0.0821 | 0.0821 | 0.0316 | 6.63E-58 |
| rs11231693 | A | G | 0.2223 | 0.0574 | 0.0574 | 0.0378 | 4.02E-09 |
| rs112393817 | G | C | -0.116 | 0.2174 | 0.2174 | 0.0211 | 3.80E-08 |
| rs11245631 | T | C | -0.1474 | 0.1955 | 0.1955 | 0.0223 | 3.99E-11 |
| rs11252324 | T | G | -0.2339 | 0.077 | 0.077 | 0.0328 | 1.03E-12 |
| rs1133400 | G | A | 0.1318 | 0.2148 | 0.2148 | 0.0215 | 8.30E-10 |
| rs114503346 | T | C | -0.2678 | 0.0461 | 0.0461 | 0.0426 | 3.10E-10 |
| rs114714860 | C | G | 0.33 | 0.1683 | 0.1683 | 0.0236 | 1.42E-44 |
| rs115447786 | T | C | 0.2904 | 0.0427 | 0.0427 | 0.0455 | 1.75E-10 |
| rs11556924 | T | C | -0.181 | 0.3827 | 0.3827 | 0.0181 | 1.83E-23 |
| rs11578696 | G | A | -0.1459 | 0.1342 | 0.1342 | 0.0258 | 1.65E-08 |
| rs11592107 | A | G | 0.1203 | 0.3094 | 0.3094 | 0.0187 | 1.23E-10 |
| rs116063464 | A | G | 0.2017 | 0.0601 | 0.0601 | 0.0369 | 4.68E-08 |
| rs11636952 | C | T | -0.3997 | 0.6869 | 0.3131 | 0.0189 | 5.21E-99 |
| rs11661473 | A | G | 0.2007 | 0.2683 | 0.2683 | 0.0196 | 1.54E-24 |
| rs11664194 | A | T | -0.1078 | 0.4603 | 0.4603 | 0.0176 | 8.69E-10 |
| rs11665020 | C | G | -0.1423 | 0.322 | 0.322 | 0.0187 | 2.78E-14 |
| rs11692619 | T | C | -0.1281 | 0.3607 | 0.3607 | 0.0184 | 3.31E-12 |
| rs11721984 | T | C | -0.1409 | 0.4532 | 0.4532 | 0.0177 | 1.89E-15 |
| rs11745207 | G | C | -0.1132 | 0.2579 | 0.2579 | 0.0199 | 1.29E-08 |
| rs11778153 | C | T | -0.1192 | 0.3569 | 0.3569 | 0.0182 | 5.84E-11 |
| rs1178979 | C | T | -0.1504 | 0.1953 | 0.1953 | 0.0221 | 9.96E-12 |
| rs11859505 | G | A | 0.1037 | 0.5805 | 0.4195 | 0.0181 | 9.76E-09 |
| rs11923343 | G | A | 0.1138 | 0.6396 | 0.3604 | 0.0181 | 3.10E-10 |
| rs11923667 | A | T | 0.1175 | 0.4071 | 0.4071 | 0.0177 | 3.10E-11 |
| rs11945489 | T | C | -0.1392 | 0.2909 | 0.2909 | 0.0192 | 3.99E-13 |
| rs11960210 | C | T | -0.2474 | 0.3751 | 0.3751 | 0.018 | 3.36E-43 |
| rs11961593 | T | C | -0.3158 | 0.0685 | 0.0685 | 0.0349 | 1.49E-19 |
| rs12088448 | C | A | 0.1544 | 0.356 | 0.356 | 0.0182 | 2.53E-17 |
| rs1212061 | C | G | 0.1281 | 0.7324 | 0.2676 | 0.0197 | 7.91E-11 |
| rs12149254 | A | G | -0.1324 | 0.1697 | 0.1697 | 0.0232 | 1.14E-08 |
| rs12152463 | T | C | 0.1006 | 0.4251 | 0.4251 | 0.0174 | 8.01E-09 |
| rs1215469 | C | A | 0.1383 | 0.7705 | 0.2295 | 0.0211 | 5.23E-11 |
| rs12247028 | A | G | -0.1396 | 0.6322 | 0.3678 | 0.0188 | 1.18E-13 |
| rs12258967 | G | C | -0.354 | 0.2958 | 0.2958 | 0.0193 | 3.27E-75 |
| rs12321 | C | G | -0.1492 | 0.4333 | 0.4333 | 0.0175 | 1.44E-17 |
| rs12337056 | T | C | 0.1364 | 0.1761 | 0.1761 | 0.0228 | 2.18E-09 |
| rs12363520 | A | T | 0.1672 | 0.229 | 0.229 | 0.0213 | 4.24E-15 |
| rs12405515 | T | G | -0.1698 | 0.5702 | 0.4298 | 0.0174 | 1.92E-22 |
| rs1243876 | T | C | -0.1063 | 0.7012 | 0.2988 | 0.019 | 2.14E-08 |
| rs12503341 | A | G | -0.2993 | 0.0394 | 0.0394 | 0.0462 | 9.43E-11 |
| rs12509595 | C | T | 0.4972 | 0.2924 | 0.2924 | 0.0192 | 1.58E-148 |
| rs12515541 | T | G | 0.1156 | 0.6072 | 0.3928 | 0.0177 | 6.23E-11 |
| rs12574332 | T | C | 0.2072 | 0.1227 | 0.1227 | 0.0266 | 6.14E-15 |
| rs12596630 | T | C | 0.2606 | 0.0905 | 0.0905 | 0.0314 | 1.03E-16 |
| rs12609484 | T | G | -0.1398 | 0.3163 | 0.3163 | 0.0188 | 1.16E-13 |
| rs12627514 | G | C | 0.2164 | 0.2897 | 0.2897 | 0.0196 | 1.99E-28 |
| rs1263671 | C | T | 0.1394 | 0.1632 | 0.1632 | 0.0238 | 4.69E-09 |
| rs1265157 | G | C | -0.1444 | 0.3521 | 0.3521 | 0.0187 | 1.18E-14 |
| rs12656497 | C | T | 0.3063 | 0.5968 | 0.4032 | 0.0176 | 1.47E-67 |
| rs1265842 | C | T | -0.1113 | 0.5166 | 0.4834 | 0.0174 | 1.70E-10 |
| rs12693302 | A | G | -0.2378 | 0.6518 | 0.3482 | 0.0181 | 2.15E-39 |
| rs12728150 | G | A | 0.2045 | 0.081 | 0.081 | 0.0318 | 1.28E-10 |
| rs1275985 | T | C | -0.2943 | 0.6133 | 0.3867 | 0.0177 | 2.77E-62 |
| rs12790943 | T | C | -0.1002 | 0.4213 | 0.4213 | 0.0175 | 1.14E-08 |
| rs12866098 | A | G | 0.1033 | 0.3423 | 0.3423 | 0.0186 | 2.73E-08 |
| rs12906962 | C | T | 0.2378 | 0.3233 | 0.3233 | 0.0188 | 8.73E-37 |
| rs12919839 | T | C | -0.1098 | 0.2841 | 0.2841 | 0.0192 | 1.04E-08 |
| rs12929303 | A | G | 0.1572 | 0.5325 | 0.4675 | 0.0174 | 1.58E-19 |
| rs12938803 | C | A | 0.1598 | 0.8111 | 0.1889 | 0.0224 | 8.76E-13 |
| rs12978472 | G | C | -0.4779 | 0.1247 | 0.1247 | 0.0281 | 8.46E-65 |
| rs12990959 | C | T | 0.1271 | 0.3125 | 0.3125 | 0.0187 | 1.11E-11 |
| rs13004222 | G | C | -0.2944 | 0.051 | 0.051 | 0.0393 | 7.11E-14 |
| rs13107325 | T | C | -0.6747 | 0.0742 | 0.0742 | 0.0339 | 3.72E-88 |
| rs13118687 | A | G | -0.1496 | 0.4702 | 0.4702 | 0.0175 | 1.37E-17 |
| rs13124515 | C | T | 0.1052 | 0.6869 | 0.3131 | 0.0187 | 1.98E-08 |
| rs13139571 | A | C | -0.2408 | 0.2366 | 0.2366 | 0.0203 | 2.29E-32 |
| rs13152154 | T | C | -0.1186 | 0.7293 | 0.2707 | 0.0195 | 1.23E-09 |
| rs13215166 | G | A | 0.3094 | 0.4415 | 0.4415 | 0.0174 | 1.79E-70 |
| rs1322639 | A | G | -0.1584 | 0.7766 | 0.2234 | 0.0209 | 3.87E-14 |
| rs13237249 | T | C | 0.1366 | 0.398 | 0.398 | 0.0177 | 1.02E-14 |
| rs1327235 | G | A | 0.3018 | 0.4714 | 0.4714 | 0.0173 | 4.76E-68 |
| rs1332812 | A | T | -0.1145 | 0.6469 | 0.3531 | 0.0181 | 2.71E-10 |
| rs13355146 | T | C | 0.1224 | 0.3832 | 0.3832 | 0.0178 | 6.39E-12 |
| rs13358657 | G | A | 0.224 | 0.1332 | 0.1332 | 0.0255 | 1.70E-18 |
| rs135023 | G | A | 0.1036 | 0.5784 | 0.4216 | 0.0175 | 3.53E-09 |
| rs1373780 | C | G | 0.1246 | 0.1845 | 0.1845 | 0.0224 | 2.58E-08 |
| rs138420351 | T | C | 0.5568 | 0.016 | 0.016 | 0.0854 | 7.11E-11 |
| rs1390754 | T | C | 0.1258 | 0.3992 | 0.3992 | 0.0177 | 1.19E-12 |
| rs142449193 | T | C | -0.2573 | 0.046 | 0.046 | 0.0426 | 1.51E-09 |
| rs1425486 | T | C | -0.1331 | 0.3207 | 0.3207 | 0.0187 | 1.11E-12 |
| rs1433121 | T | C | -0.1352 | 0.6906 | 0.3094 | 0.0188 | 6.91E-13 |
| rs1436138 | G | A | -0.1991 | 0.3633 | 0.3633 | 0.0182 | 7.33E-28 |
| rs1446468 | C | T | 0.253 | 0.546 | 0.454 | 0.0174 | 1.21E-47 |
| rs1449596 | G | C | 0.1085 | 0.6455 | 0.3545 | 0.0181 | 1.92E-09 |
| rs145422110 | T | C | 0.5356 | 0.0162 | 0.0162 | 0.0745 | 6.41E-13 |
| rs1467049 | G | T | -0.1244 | 0.1949 | 0.1949 | 0.0219 | 1.35E-08 |
| rs1468816 | C | A | -0.1242 | 0.2277 | 0.2277 | 0.0212 | 4.65E-09 |
| rs147501096 | C | G | -0.1955 | 0.072 | 0.072 | 0.0341 | 9.94E-09 |
| rs148401029 | A | C | -0.3122 | 0.0352 | 0.0352 | 0.0486 | 1.32E-10 |
| rs15009 | G | C | 0.1233 | 0.3527 | 0.3527 | 0.0181 | 1.00E-11 |
| rs1502358 | A | G | -0.1127 | 0.6813 | 0.3187 | 0.0185 | 1.13E-09 |
| rs150816167 | C | T | 0.2873 | 0.0451 | 0.0451 | 0.0446 | 1.17E-10 |
| rs1523871 | G | C | 0.1186 | 0.4338 | 0.4338 | 0.0176 | 1.46E-11 |
| rs1527797 | T | C | -0.1409 | 0.7395 | 0.2605 | 0.0197 | 8.68E-13 |
| rs1528293 | T | A | -0.2764 | 0.5079 | 0.4921 | 0.0173 | 1.48E-57 |
| rs1534338 | A | G | -0.1144 | 0.6029 | 0.3971 | 0.0178 | 1.24E-10 |
| rs1582931 | A | G | 0.2161 | 0.4748 | 0.4748 | 0.0175 | 4.51E-35 |
| rs1623474 | T | C | 0.2234 | 0.33 | 0.33 | 0.0184 | 6.24E-34 |
| rs1669907 | G | T | -0.1158 | 0.6968 | 0.3032 | 0.0191 | 1.36E-09 |
| rs16853198 | G | A | -0.3386 | 0.0762 | 0.0762 | 0.0327 | 4.44E-25 |
| rs1687295 | C | T | -0.2061 | 0.7296 | 0.2704 | 0.0194 | 2.99E-26 |
| rs16875357 | G | T | 0.1205 | 0.2431 | 0.2431 | 0.0203 | 2.70E-09 |
| rs16896276 | A | T | -0.1309 | 0.2625 | 0.2625 | 0.0198 | 3.82E-11 |
| rs1693560 | G | A | -0.1525 | 0.4603 | 0.4603 | 0.0175 | 3.41E-18 |
| rs17321041 | T | C | 0.2313 | 0.0633 | 0.0633 | 0.0363 | 1.78E-10 |
| rs1732664 | C | T | 0.1083 | 0.6783 | 0.3217 | 0.0194 | 2.58E-08 |
| rs173396 | A | G | 0.2146 | 0.5787 | 0.4213 | 0.0175 | 1.38E-34 |
| rs17396055 | A | G | -0.115 | 0.3324 | 0.3324 | 0.0184 | 4.13E-10 |
| rs17432462 | C | T | 0.1036 | 0.3766 | 0.3766 | 0.0179 | 7.31E-09 |
| rs17454517 | G | A | -0.1216 | 0.5064 | 0.4936 | 0.0174 | 2.65E-12 |
| rs17677603 | G | A | 0.2 | 0.3837 | 0.3837 | 0.0178 | 3.90E-29 |
| rs17696749 | G | C | 0.1255 | 0.5861 | 0.4139 | 0.0176 | 9.43E-13 |
| rs17807723 | A | G | -0.1757 | 0.1377 | 0.1377 | 0.0257 | 7.44E-12 |
| rs17832905 | A | C | 0.1923 | 0.0717 | 0.0717 | 0.0346 | 2.80E-08 |
| rs17880989 | A | G | 0.4014 | 0.0259 | 0.0259 | 0.0591 | 1.11E-11 |
| rs1790123 | T | C | 0.1991 | 0.8032 | 0.1968 | 0.0218 | 6.87E-20 |
| rs1799945 | G | C | 0.3888 | 0.1497 | 0.1497 | 0.0244 | 3.88E-57 |
| rs1819663 | G | A | -0.1147 | 0.4929 | 0.4929 | 0.0174 | 4.62E-11 |
| rs1867624 | T | C | 0.1412 | 0.6147 | 0.3853 | 0.0178 | 2.08E-15 |
| rs1871190 | T | G | 0.1078 | 0.3344 | 0.3344 | 0.0186 | 6.63E-09 |
| rs1876490 | A | G | 0.1364 | 0.7167 | 0.2833 | 0.0192 | 1.16E-12 |
| rs1882961 | T | C | 0.1272 | 0.3088 | 0.3088 | 0.0188 | 1.40E-11 |
| rs1889785 | A | G | 0.1255 | 0.4551 | 0.4551 | 0.0174 | 5.61E-13 |
| rs1903752 | T | C | -0.0987 | 0.5386 | 0.4614 | 0.0178 | 3.20E-08 |
| rs1906672 | A | G | 0.1402 | 0.2324 | 0.2324 | 0.0205 | 8.47E-12 |
| rs194742 | C | T | -0.1281 | 0.831 | 0.169 | 0.0232 | 3.17E-08 |
| rs1948151 | A | G | -0.1355 | 0.2777 | 0.2777 | 0.0193 | 2.12E-12 |
| rs1950500 | C | T | -0.1396 | 0.7081 | 0.2919 | 0.019 | 2.20E-13 |
| rs1984195 | A | G | 0.1736 | 0.4883 | 0.4883 | 0.0173 | 1.43E-23 |
| rs1999996 | G | A | 0.1124 | 0.4407 | 0.4407 | 0.0176 | 1.67E-10 |
| rs2067831 | C | G | -0.128 | 0.2723 | 0.2723 | 0.0195 | 5.08E-11 |
| rs2070527 | C | A | 0.1473 | 0.7508 | 0.2492 | 0.0202 | 3.08E-13 |
| rs2133386 | A | C | -0.1322 | 0.4327 | 0.4327 | 0.0176 | 5.21E-14 |
| rs2146315 | T | C | -0.1197 | 0.2318 | 0.2318 | 0.0205 | 5.03E-09 |
| rs2160236 | C | G | -0.1421 | 0.3792 | 0.3792 | 0.0181 | 4.31E-15 |
| rs2169137 | C | G | 0.1588 | 0.7287 | 0.2713 | 0.0194 | 3.17E-16 |
| rs2191046 | G | T | -0.1184 | 0.2646 | 0.2646 | 0.0197 | 1.78E-09 |
| rs2236295 | T | G | -0.207 | 0.3992 | 0.3992 | 0.0177 | 1.42E-31 |
| rs2239268 | A | G | 0.1097 | 0.7005 | 0.2995 | 0.019 | 7.40E-09 |
| rs2239917 | C | T | -0.1731 | 0.5748 | 0.4252 | 0.0176 | 9.69E-23 |
| rs2256187 | A | G | -0.1446 | 0.1575 | 0.1575 | 0.0239 | 1.39E-09 |
| rs2271139 | A | C | -0.1247 | 0.286 | 0.286 | 0.0192 | 8.23E-11 |
| rs2273654 | C | T | -0.1165 | 0.4392 | 0.4392 | 0.0175 | 2.75E-11 |
| rs227426 | T | G | 0.1119 | 0.5619 | 0.4381 | 0.0175 | 1.75E-10 |
| rs2291516 | A | G | 0.2422 | 0.1026 | 0.1026 | 0.0292 | 9.88E-17 |
| rs2305654 | A | C | 0.1707 | 0.3448 | 0.3448 | 0.0186 | 3.99E-20 |
| rs2307111 | C | T | 0.1742 | 0.3966 | 0.3966 | 0.0178 | 1.62E-22 |
| rs234616 | A | G | -0.1152 | 0.3112 | 0.3112 | 0.0188 | 8.79E-10 |
| rs2384061 | A | G | -0.1741 | 0.4221 | 0.4221 | 0.0175 | 2.25E-23 |
| rs2397060 | C | T | 0.161 | 0.1405 | 0.1405 | 0.0251 | 1.46E-10 |
| rs2421200 | T | G | -0.1097 | 0.4882 | 0.4882 | 0.0173 | 2.59E-10 |
| rs2444769 | A | C | 0.158 | 0.7949 | 0.2051 | 0.0219 | 4.85E-13 |
| rs2469141 | C | T | -0.1351 | 0.1628 | 0.1628 | 0.0238 | 1.39E-08 |
| rs2484294 | A | G | 0.3165 | 0.7327 | 0.2673 | 0.0196 | 1.17E-58 |
| rs2487926 | G | A | -0.0972 | 0.4295 | 0.4295 | 0.0176 | 3.31E-08 |
| rs2493136 | T | C | 0.2345 | 0.4075 | 0.4075 | 0.0176 | 1.92E-40 |
| rs2493296 | T | C | 0.2496 | 0.1419 | 0.1419 | 0.0254 | 7.45E-23 |
| rs2515424 | T | C | 0.1278 | 0.4336 | 0.4336 | 0.0174 | 2.18E-13 |
| rs2548459 | C | T | 0.132 | 0.5195 | 0.4805 | 0.0176 | 5.95E-14 |
| rs2569882 | C | T | -0.1199 | 0.4342 | 0.4342 | 0.0182 | 4.28E-11 |
| rs2586970 | G | A | 0.1493 | 0.5639 | 0.4361 | 0.0175 | 1.56E-17 |
| rs2589218 | C | T | 0.1207 | 0.2698 | 0.2698 | 0.0196 | 6.90E-10 |
| rs2598 | G | A | -0.1387 | 0.4674 | 0.4674 | 0.0175 | 1.94E-15 |
| rs2627313 | T | C | 0.151 | 0.4457 | 0.4457 | 0.0175 | 5.85E-18 |
| rs2643826 | T | C | 0.1857 | 0.4508 | 0.4508 | 0.0175 | 2.83E-26 |
| rs2681485 | A | G | 0.2945 | 0.5976 | 0.4024 | 0.0176 | 1.31E-62 |
| rs2744133 | G | A | -0.1435 | 0.2749 | 0.2749 | 0.0193 | 1.17E-13 |
| rs28377357 | A | G | -0.1243 | 0.2938 | 0.2938 | 0.019 | 6.03E-11 |
| rs28429256 | A | G | 0.1636 | 0.3344 | 0.3344 | 0.0188 | 2.83E-18 |
| rs28544928 | G | T | -0.1543 | 0.2535 | 0.2535 | 0.0199 | 9.13E-15 |
| rs2854746 | C | G | 0.113 | 0.3997 | 0.3997 | 0.018 | 3.26E-10 |
| rs28661492 | T | C | -0.1359 | 0.2022 | 0.2022 | 0.0222 | 9.56E-10 |
| rs28667801 | T | A | 0.1622 | 0.407 | 0.407 | 0.018 | 1.90E-19 |
| rs28675079 | A | G | -0.1444 | 0.1867 | 0.1867 | 0.0222 | 8.34E-11 |
| rs2906152 | A | G | -0.1873 | 0.6304 | 0.3696 | 0.0181 | 5.55E-25 |
| rs2921604 | C | T | 0.096 | 0.4633 | 0.4633 | 0.0176 | 4.46E-08 |
| rs2925345 | C | T | -0.189 | 0.5324 | 0.4676 | 0.0174 | 1.60E-27 |
| rs2957468 | G | A | -0.1377 | 0.6646 | 0.3354 | 0.0185 | 8.43E-14 |
| rs3006583 | C | T | 0.1303 | 0.1886 | 0.1886 | 0.0222 | 4.66E-09 |
| rs310597 | G | A | 0.1152 | 0.3695 | 0.3695 | 0.0181 | 2.18E-10 |
| rs311564 | A | G | -0.133 | 0.3461 | 0.3461 | 0.0183 | 4.23E-13 |
| rs3117736 | T | C | 0.2374 | 0.2661 | 0.2661 | 0.0196 | 9.71E-34 |
| rs318712 | C | T | 0.2389 | 0.0759 | 0.0759 | 0.0334 | 9.17E-13 |
| rs335170 | C | A | -0.113 | 0.5923 | 0.4077 | 0.0177 | 1.61E-10 |
| rs34130368 | T | G | -0.2027 | 0.1172 | 0.1172 | 0.0284 | 8.77E-13 |
| rs342977 | A | G | -0.1577 | 0.7715 | 0.2285 | 0.0205 | 1.67E-14 |
| rs34413141 | A | T | -0.1808 | 0.1821 | 0.1821 | 0.0227 | 1.49E-15 |
| rs34487963 | A | C | -0.5734 | 0.0185 | 0.0185 | 0.0712 | 8.18E-16 |
| rs34517439 | A | C | -0.2514 | 0.1199 | 0.1199 | 0.0279 | 2.02E-19 |
| rs34587839 | A | G | -0.1669 | 0.1535 | 0.1535 | 0.0244 | 8.22E-12 |
| rs34645159 | A | G | -0.133 | 0.5013 | 0.4987 | 0.0174 | 2.07E-14 |
| rs347585 | T | C | 0.1506 | 0.7014 | 0.2986 | 0.0189 | 1.57E-15 |
| rs35091929 | C | T | -0.1828 | 0.6032 | 0.3968 | 0.0177 | 6.46E-25 |
| rs35213536 | T | G | 0.2044 | 0.2467 | 0.2467 | 0.0205 | 2.54E-23 |
| rs35261542 | A | C | 0.1196 | 0.2679 | 0.2679 | 0.0195 | 9.29E-10 |
| rs35413927 | G | A | 0.1274 | 0.3049 | 0.3049 | 0.0189 | 1.77E-11 |
| rs35443 | C | G | -0.2661 | 0.3858 | 0.3858 | 0.0178 | 1.20E-50 |
| rs35506078 | C | T | 0.1348 | 0.3366 | 0.3366 | 0.0183 | 1.54E-13 |
| rs36169093 | A | G | 0.1231 | 0.5037 | 0.4963 | 0.0179 | 5.56E-12 |
| rs3735533 | C | T | 0.487 | 0.9258 | 0.0742 | 0.0331 | 6.32E-49 |
| rs3743111 | A | G | 0.1517 | 0.613 | 0.387 | 0.0178 | 1.62E-17 |
| rs3743369 | A | G | 0.104 | 0.6278 | 0.3722 | 0.0179 | 6.82E-09 |
| rs3761077 | T | G | 0.1726 | 0.1106 | 0.1106 | 0.0283 | 1.04E-09 |
| rs3772219 | C | A | -0.1754 | 0.3193 | 0.3193 | 0.0185 | 2.94E-21 |
| rs3774702 | A | G | 0.147 | 0.1768 | 0.1768 | 0.0228 | 1.18E-10 |
| rs3776299 | A | G | 0.1266 | 0.4559 | 0.4559 | 0.0175 | 5.06E-13 |
| rs3785837 | A | G | 0.1453 | 0.7635 | 0.2365 | 0.0213 | 9.57E-12 |
| rs3798293 | G | A | 0.1328 | 0.2165 | 0.2165 | 0.021 | 2.70E-10 |
| rs3802230 | A | C | -0.1605 | 0.5446 | 0.4554 | 0.0174 | 2.75E-20 |
| rs3802517 | A | T | 0.1286 | 0.4615 | 0.4615 | 0.0173 | 9.29E-14 |
| rs3807101 | T | C | -0.1743 | 0.123 | 0.123 | 0.0265 | 4.57E-11 |
| rs3861113 | A | C | 0.2126 | 0.0825 | 0.0825 | 0.0322 | 3.95E-11 |
| rs3864004 | A | G | 0.1004 | 0.4685 | 0.4685 | 0.0173 | 6.28E-09 |
| rs3916033 | T | C | -0.1233 | 0.5565 | 0.4435 | 0.0185 | 2.41E-11 |
| rs3918226 | T | C | 0.6117 | 0.0813 | 0.0813 | 0.0329 | 5.31E-77 |
| rs3943093 | T | C | 0.2477 | 0.3234 | 0.3234 | 0.0184 | 3.94E-41 |
| rs4074812 | A | G | -0.1336 | 0.5535 | 0.4465 | 0.0175 | 2.07E-14 |
| rs4077158 | C | T | 0.1832 | 0.5286 | 0.4714 | 0.0173 | 3.09E-26 |
| rs4141663 | T | C | -0.1496 | 0.4216 | 0.4216 | 0.0175 | 1.41E-17 |
| rs4244200 | C | G | -0.1215 | 0.2799 | 0.2799 | 0.0193 | 3.23E-10 |
| rs4245930 | A | G | -0.1219 | 0.6322 | 0.3678 | 0.018 | 1.14E-11 |
| rs4284362 | A | C | -0.1586 | 0.7181 | 0.2819 | 0.0194 | 3.24E-16 |
| rs4295 | G | C | -0.1802 | 0.6202 | 0.3798 | 0.018 | 1.71E-23 |
| rs4306343 | T | A | 0.317 | 0.7212 | 0.2788 | 0.0193 | 8.22E-61 |
| rs4362428 | A | C | -0.1127 | 0.4087 | 0.4087 | 0.0176 | 1.45E-10 |
| rs440454 | G | A | 0.2602 | 0.684 | 0.316 | 0.0192 | 7.52E-42 |
| rs4424827 | T | C | -0.0981 | 0.5669 | 0.4331 | 0.0175 | 2.11E-08 |
| rs4507125 | C | A | 0.1244 | 0.2136 | 0.2136 | 0.0211 | 3.60E-09 |
| rs4507656 | G | C | 0.1487 | 0.3066 | 0.3066 | 0.0199 | 8.69E-14 |
| rs45474499 | T | C | 0.3562 | 0.0473 | 0.0473 | 0.0415 | 8.50E-18 |
| rs4556017 | T | C | -0.1601 | 0.8524 | 0.1476 | 0.0247 | 9.66E-11 |
| rs4615669 | G | A | 0.114 | 0.4403 | 0.4403 | 0.0174 | 6.10E-11 |
| rs4645335 | G | A | -0.1142 | 0.664 | 0.336 | 0.0185 | 7.04E-10 |
| rs4675682 | C | T | 0.1409 | 0.4622 | 0.4622 | 0.0173 | 4.49E-16 |
| rs4704514 | T | C | 0.1087 | 0.2833 | 0.2833 | 0.0193 | 1.71E-08 |
| rs4739832 | C | A | -0.1323 | 0.4167 | 0.4167 | 0.0176 | 5.81E-14 |
| rs4743021 | C | T | 0.108 | 0.3147 | 0.3147 | 0.0194 | 2.41E-08 |
| rs4756779 | G | A | 0.1456 | 0.1758 | 0.1758 | 0.0227 | 1.48E-10 |
| rs4814837 | T | C | -0.1003 | 0.3424 | 0.3424 | 0.0184 | 4.62E-08 |
| rs4873492 | T | C | 0.1401 | 0.1725 | 0.1725 | 0.0231 | 1.28E-09 |
| rs488834 | T | C | -0.1931 | 0.7641 | 0.2359 | 0.0208 | 1.94E-20 |
| rs4890499 | A | G | 0.1131 | 0.2548 | 0.2548 | 0.0199 | 1.33E-08 |
| rs4891258 | G | A | 0.1159 | 0.3174 | 0.3174 | 0.0187 | 5.72E-10 |
| rs4903064 | C | T | -0.1543 | 0.2355 | 0.2355 | 0.0206 | 7.84E-14 |
| rs4909314 | A | T | 0.1339 | 0.3948 | 0.3948 | 0.0177 | 3.41E-14 |
| rs4926499 | C | G | 0.1694 | 0.826 | 0.174 | 0.0248 | 9.37E-12 |
| rs4926901 | A | G | 0.0984 | 0.3548 | 0.3548 | 0.018 | 4.82E-08 |
| rs4926923 | C | T | -0.1918 | 0.0883 | 0.0883 | 0.0308 | 4.75E-10 |
| rs4930295 | G | C | -0.2418 | 0.2216 | 0.2216 | 0.0209 | 5.54E-31 |
| rs4932373 | C | A | 0.3664 | 0.3257 | 0.3257 | 0.0189 | 7.71E-84 |
| rs4936099 | A | C | 0.1745 | 0.5989 | 0.4011 | 0.0178 | 1.16E-22 |
| rs4952668 | A | G | -0.192 | 0.6237 | 0.3763 | 0.018 | 1.13E-26 |
| rs4954192 | T | C | -0.1225 | 0.3872 | 0.3872 | 0.0179 | 8.15E-12 |
| rs5012479 | G | T | -0.0956 | 0.5205 | 0.4795 | 0.0174 | 3.66E-08 |
| rs504217 | T | C | 0.2745 | 0.0736 | 0.0736 | 0.0335 | 2.51E-16 |
| rs504691 | A | C | -0.1177 | 0.4002 | 0.4002 | 0.0177 | 3.14E-11 |
| rs507666 | A | G | -0.2854 | 0.1872 | 0.1872 | 0.0223 | 2.27E-37 |
| rs509067 | C | T | 0.1436 | 0.5863 | 0.4137 | 0.0175 | 2.65E-16 |
| rs520592 | G | T | 0.1727 | 0.1413 | 0.1413 | 0.0248 | 3.51E-12 |
| rs544012 | G | T | -0.1143 | 0.7339 | 0.2661 | 0.0201 | 1.37E-08 |
| rs55684003 | G | A | -0.122 | 0.3041 | 0.3041 | 0.0189 | 1.01E-10 |
| rs55770741 | T | C | -0.1281 | 0.5613 | 0.4387 | 0.0175 | 2.20E-13 |
| rs55857306 | A | G | -0.5224 | 0.1602 | 0.1602 | 0.0235 | 5.05E-109 |
| rs55868524 | A | G | 0.1443 | 0.6111 | 0.3889 | 0.0178 | 5.54E-16 |
| rs55944332 | G | A | 0.2365 | 0.2368 | 0.2368 | 0.0204 | 3.27E-31 |
| rs55993676 | T | G | -0.2097 | 0.2916 | 0.2916 | 0.0191 | 3.82E-28 |
| rs56256111 | A | G | 0.1926 | 0.1442 | 0.1442 | 0.0263 | 2.60E-13 |
| rs56809883 | T | G | 0.1102 | 0.2595 | 0.2595 | 0.0199 | 3.03E-08 |
| rs57708073 | G | A | -0.1907 | 0.2608 | 0.2608 | 0.0214 | 4.73E-19 |
| rs57748895 | T | A | 0.6627 | 0.0179 | 0.0179 | 0.0666 | 2.49E-23 |
| rs58693787 | G | A | -0.1584 | 0.2458 | 0.2458 | 0.0202 | 3.82E-15 |
| rs5992929 | T | C | 0.1684 | 0.2834 | 0.2834 | 0.0193 | 3.07E-18 |
| rs602521 | A | G | 0.1351 | 0.2656 | 0.2656 | 0.0195 | 3.97E-12 |
| rs6026739 | T | A | 0.5032 | 0.1226 | 0.1226 | 0.0266 | 1.49E-79 |
| rs6031431 | G | A | 0.1153 | 0.4622 | 0.4622 | 0.0175 | 4.94E-11 |
| rs604723 | C | T | 0.3848 | 0.7247 | 0.2753 | 0.0194 | 2.32E-87 |
| rs6058261 | A | C | -0.1201 | 0.2736 | 0.2736 | 0.0195 | 6.83E-10 |
| rs6062477 | T | C | 0.1191 | 0.5756 | 0.4244 | 0.0177 | 1.81E-11 |
| rs6078393 | G | T | -0.1205 | 0.4106 | 0.4106 | 0.0176 | 7.66E-12 |
| rs6108168 | A | C | -0.1901 | 0.2546 | 0.2546 | 0.0199 | 1.10E-21 |
| rs61789369 | G | A | 0.3039 | 0.0435 | 0.0435 | 0.0436 | 3.06E-12 |
| rs61909958 | G | C | -0.1275 | 0.1881 | 0.1881 | 0.0228 | 2.21E-08 |
| rs61912333 | G | C | -0.1191 | 0.5037 | 0.4963 | 0.0176 | 1.13E-11 |
| rs61917655 | T | C | 0.2246 | 0.1011 | 0.1011 | 0.0297 | 3.72E-14 |
| rs61948065 | C | A | 0.1737 | 0.1212 | 0.1212 | 0.027 | 1.17E-10 |
| rs62030049 | G | A | -0.1336 | 0.2404 | 0.2404 | 0.0209 | 1.55E-10 |
| rs62155750 | G | A | 0.2177 | 0.3074 | 0.3074 | 0.0196 | 8.27E-29 |
| rs62158170 | G | A | -0.1645 | 0.2166 | 0.2166 | 0.0211 | 6.63E-15 |
| rs62234672 | A | C | 0.1248 | 0.1752 | 0.1752 | 0.0229 | 4.92E-08 |
| rs62301873 | G | A | 0.1734 | 0.1061 | 0.1061 | 0.0284 | 1.06E-09 |
| rs62378003 | T | C | -0.1714 | 0.1141 | 0.1141 | 0.028 | 8.90E-10 |
| rs62413546 | T | C | -0.1877 | 0.0847 | 0.0847 | 0.032 | 4.58E-09 |
| rs62434124 | T | C | -0.4853 | 0.0711 | 0.0711 | 0.0338 | 7.83E-47 |
| rs62503324 | T | C | 0.2033 | 0.2397 | 0.2397 | 0.0204 | 2.11E-23 |
| rs6271 | T | C | -0.4313 | 0.0737 | 0.0737 | 0.0352 | 1.72E-34 |
| rs636202 | C | T | -0.1023 | 0.5185 | 0.4815 | 0.0174 | 4.40E-09 |
| rs6464165 | C | T | 0.217 | 0.2809 | 0.2809 | 0.0195 | 7.34E-29 |
| rs6487076 | G | A | -0.174 | 0.223 | 0.223 | 0.0209 | 8.69E-17 |
| rs6546810 | C | T | 0.12 | 0.3525 | 0.3525 | 0.0181 | 3.16E-11 |
| rs6556384 | A | C | -0.152 | 0.8105 | 0.1895 | 0.0221 | 5.91E-12 |
| rs6580970 | T | C | -0.1661 | 0.2987 | 0.2987 | 0.0191 | 4.03E-18 |
| rs6602177 | T | C | -0.1203 | 0.7073 | 0.2927 | 0.0207 | 6.52E-09 |
| rs66682451 | G | A | -0.1348 | 0.2747 | 0.2747 | 0.0194 | 3.44E-12 |
| rs6686889 | T | C | 0.1918 | 0.2533 | 0.2533 | 0.0199 | 6.95E-22 |
| rs66887589 | C | T | 0.161 | 0.4779 | 0.4779 | 0.0174 | 1.83E-20 |
| rs6715901 | A | G | -0.1377 | 0.4962 | 0.4962 | 0.0174 | 2.76E-15 |
| rs672272 | T | C | -0.1851 | 0.6041 | 0.3959 | 0.0178 | 2.77E-25 |
| rs6735275 | C | T | -0.1225 | 0.2709 | 0.2709 | 0.0194 | 2.62E-10 |
| rs6763931 | A | G | 0.1383 | 0.4438 | 0.4438 | 0.0173 | 1.48E-15 |
| rs6777317 | A | G | 0.1249 | 0.2899 | 0.2899 | 0.0195 | 1.51E-10 |
| rs6779368 | G | A | 0.1791 | 0.3423 | 0.3423 | 0.0184 | 2.28E-22 |
| rs6795735 | T | C | -0.1438 | 0.4109 | 0.4109 | 0.0176 | 3.05E-16 |
| rs6800730 | G | A | 0.2476 | 0.6702 | 0.3298 | 0.0185 | 8.00E-41 |
| rs68085857 | T | C | 0.191 | 0.234 | 0.234 | 0.0205 | 9.82E-21 |
| rs682681 | C | T | 0.1454 | 0.6665 | 0.3335 | 0.0185 | 4.47E-15 |
| rs6875967 | G | A | -0.1344 | 0.6479 | 0.3521 | 0.0181 | 1.21E-13 |
| rs6905288 | A | G | 0.1759 | 0.5681 | 0.4319 | 0.0179 | 7.79E-23 |
| rs6934891 | A | G | 0.1275 | 0.4255 | 0.4255 | 0.0177 | 5.21E-13 |
| rs6961048 | G | C | 0.2729 | 0.1038 | 0.1038 | 0.0286 | 1.28E-21 |
| rs6983239 | T | G | 0.1159 | 0.2188 | 0.2188 | 0.0211 | 3.71E-08 |
| rs7012891 | C | T | 0.1391 | 0.2367 | 0.2367 | 0.0205 | 1.20E-11 |
| rs710249 | C | G | 0.1501 | 0.4264 | 0.4264 | 0.0174 | 6.43E-18 |
| rs7106104 | C | T | 0.1186 | 0.281 | 0.281 | 0.0193 | 7.72E-10 |
| rs710698 | G | A | -0.1059 | 0.4135 | 0.4135 | 0.0176 | 1.88E-09 |
| rs7115331 | G | T | 0.1266 | 0.2857 | 0.2857 | 0.0192 | 3.91E-11 |
| rs7132012 | G | A | -0.1563 | 0.3253 | 0.3253 | 0.0185 | 3.17E-17 |
| rs7134440 | T | C | 0.2278 | 0.0826 | 0.0826 | 0.0323 | 1.75E-12 |
| rs7137828 | T | C | -0.5027 | 0.5183 | 0.4817 | 0.0176 | 4.80E-180 |
| rs7155504 | C | T | -0.2286 | 0.0876 | 0.0876 | 0.0317 | 5.16E-13 |
| rs7192407 | C | T | -0.1019 | 0.528 | 0.472 | 0.0174 | 4.53E-09 |
| rs7217916 | G | A | -0.1111 | 0.6146 | 0.3854 | 0.0179 | 5.63E-10 |
| rs722783 | A | G | -0.2093 | 0.2216 | 0.2216 | 0.0208 | 9.03E-24 |
| rs7235890 | T | G | -0.1692 | 0.8956 | 0.1044 | 0.0288 | 4.12E-09 |
| rs7257694 | T | C | 0.1837 | 0.4003 | 0.4003 | 0.0178 | 6.28E-25 |
| rs7259285 | A | G | 0.105 | 0.4466 | 0.4466 | 0.0176 | 2.65E-09 |
| rs72613227 | T | A | 0.1884 | 0.1269 | 0.1269 | 0.0285 | 3.87E-11 |
| rs7265695 | C | T | -0.1967 | 0.1965 | 0.1965 | 0.0219 | 2.48E-19 |
| rs72683923 | C | T | -0.5325 | 0.0212 | 0.0212 | 0.0635 | 5.02E-17 |
| rs72704264 | C | G | 0.117 | 0.2172 | 0.2172 | 0.0212 | 3.60E-08 |
| rs72719149 | C | T | 0.1279 | 0.3164 | 0.3164 | 0.0186 | 6.34E-12 |
| rs7278003 | C | T | 0.1293 | 0.5615 | 0.4385 | 0.0176 | 1.78E-13 |
| rs72831343 | G | T | -0.4936 | 0.1419 | 0.1419 | 0.0248 | 4.77E-88 |
| rs72842207 | T | C | -0.2112 | 0.2149 | 0.2149 | 0.0211 | 1.10E-23 |
| rs72976750 | C | T | 0.1718 | 0.1396 | 0.1396 | 0.0251 | 7.37E-12 |
| rs7299936 | A | G | 0.1759 | 0.5775 | 0.4225 | 0.0175 | 1.11E-23 |
| rs73033340 | G | A | -0.5312 | 0.0362 | 0.0362 | 0.0525 | 5.06E-24 |
| rs73036520 | C | G | 0.1557 | 0.2543 | 0.2543 | 0.0202 | 1.34E-14 |
| rs73046792 | A | G | -0.1518 | 0.1592 | 0.1592 | 0.0245 | 5.87E-10 |
| rs7321688 | A | C | 0.1507 | 0.2325 | 0.2325 | 0.0205 | 1.99E-13 |
| rs7324697 | A | C | 0.1047 | 0.325 | 0.325 | 0.0185 | 1.59E-08 |
| rs73276406 | C | G | 0.1564 | 0.1457 | 0.1457 | 0.0246 | 1.99E-10 |
| rs7350752 | A | G | -0.1504 | 0.1241 | 0.1241 | 0.0268 | 1.97E-08 |
| rs7427249 | A | G | -0.1098 | 0.58 | 0.42 | 0.0176 | 4.34E-10 |
| rs74439044 | C | T | 0.3496 | 0.0983 | 0.0983 | 0.0294 | 1.38E-32 |
| rs751984 | C | T | -0.3937 | 0.1174 | 0.1174 | 0.0275 | 1.38E-46 |
| rs7524019 | T | C | 0.1036 | 0.492 | 0.492 | 0.0174 | 2.60E-09 |
| rs75507123 | T | G | -0.1434 | 0.1274 | 0.1274 | 0.0261 | 3.94E-08 |
| rs75511781 | G | A | 0.3721 | 0.0425 | 0.0425 | 0.047 | 2.45E-15 |
| rs7569128 | A | C | 0.1981 | 0.8185 | 0.1815 | 0.0225 | 1.22E-18 |
| rs7572130 | G | A | 0.1796 | 0.1042 | 0.1042 | 0.0287 | 4.12E-10 |
| rs7576060 | T | C | -0.1017 | 0.35 | 0.35 | 0.0181 | 2.05E-08 |
| rs7611674 | G | T | -0.1576 | 0.1962 | 0.1962 | 0.0223 | 1.67E-12 |
| rs7623706 | G | A | -0.0975 | 0.4349 | 0.4349 | 0.0176 | 2.83E-08 |
| rs76326501 | C | A | -0.3618 | 0.0911 | 0.0911 | 0.0305 | 2.17E-32 |
| rs76452347 | T | C | -0.2246 | 0.2053 | 0.2053 | 0.0229 | 9.37E-23 |
| rs76785130 | G | A | 0.4285 | 0.0199 | 0.0199 | 0.0662 | 9.36E-11 |
| rs7694000 | T | A | 0.0965 | 0.4613 | 0.4613 | 0.0175 | 3.47E-08 |
| rs76954792 | T | C | 0.1213 | 0.2322 | 0.2322 | 0.0208 | 5.06E-09 |
| rs7788746 | T | G | -0.1644 | 0.6691 | 0.3309 | 0.0183 | 3.19E-19 |
| rs77924615 | A | G | -0.3163 | 0.1982 | 0.1982 | 0.0224 | 3.72E-45 |
| rs7800558 | C | T | -0.096 | 0.4219 | 0.4219 | 0.0175 | 4.46E-08 |
| rs7805035 | A | T | 0.134 | 0.4119 | 0.4119 | 0.0176 | 2.40E-14 |
| rs78151625 | C | T | 0.1869 | 0.1658 | 0.1658 | 0.0233 | 1.04E-15 |
| rs78256308 | G | T | -0.4113 | 0.0194 | 0.0194 | 0.0657 | 3.73E-10 |
| rs786921 | A | G | -0.1145 | 0.5957 | 0.4043 | 0.0176 | 8.63E-11 |
| rs78809139 | A | G | -0.2281 | 0.1014 | 0.1014 | 0.0288 | 2.58E-15 |
| rs78909293 | C | T | -0.321 | 0.0449 | 0.0449 | 0.0429 | 7.31E-14 |
| rs79044887 | G | C | -0.2427 | 0.1476 | 0.1476 | 0.0245 | 4.01E-23 |
| rs7926335 | T | C | 0.1804 | 0.2699 | 0.2699 | 0.0195 | 2.05E-20 |
| rs79286081 | A | G | -0.1631 | 0.1021 | 0.1021 | 0.0299 | 4.83E-08 |
| rs7933758 | T | C | -0.1138 | 0.3047 | 0.3047 | 0.0191 | 2.58E-09 |
| rs7938342 | A | T | 0.2672 | 0.5877 | 0.4123 | 0.0181 | 1.92E-49 |
| rs7959649 | C | T | -0.1166 | 0.7576 | 0.2424 | 0.0202 | 8.14E-09 |
| rs7967705 | C | T | -0.2694 | 0.6196 | 0.3804 | 0.0178 | 1.54E-51 |
| rs79724577 | C | A | -0.1362 | 0.1832 | 0.1832 | 0.023 | 3.47E-09 |
| rs79889784 | T | G | -0.3941 | 0.0176 | 0.0176 | 0.0717 | 3.86E-08 |
| rs7992292 | A | G | 0.1367 | 0.824 | 0.176 | 0.0231 | 3.19E-09 |
| rs80095680 | G | A | 0.1566 | 0.2633 | 0.2633 | 0.0198 | 2.81E-15 |
| rs8014182 | T | C | -0.1942 | 0.1319 | 0.1319 | 0.0257 | 3.94E-14 |
| rs8078510 | A | G | -0.1277 | 0.2693 | 0.2693 | 0.0197 | 9.84E-11 |
| rs824523 | A | C | 0.1226 | 0.3344 | 0.3344 | 0.0183 | 2.26E-11 |
| rs881858 | A | G | 0.1553 | 0.694 | 0.306 | 0.0191 | 4.65E-16 |
| rs882624 | T | C | -0.1571 | 0.3325 | 0.3325 | 0.0185 | 2.33E-17 |
| rs908951 | T | C | -0.1983 | 0.437 | 0.437 | 0.0181 | 7.73E-28 |
| rs917522 | T | C | 0.1665 | 0.885 | 0.115 | 0.0273 | 1.04E-09 |
| rs926335 | T | C | -0.1215 | 0.4764 | 0.4764 | 0.0175 | 3.37E-12 |
| rs9286351 | G | A | 0.1412 | 0.4188 | 0.4188 | 0.0177 | 1.61E-15 |
| rs9289557 | T | C | -0.119 | 0.2604 | 0.2604 | 0.0207 | 8.68E-09 |
| rs9326869 | C | T | -0.1096 | 0.7513 | 0.2487 | 0.02 | 3.99E-08 |
| rs9365555 | G | A | -0.1254 | 0.3259 | 0.3259 | 0.0187 | 1.96E-11 |
| rs9368 | A | C | 0.1121 | 0.3871 | 0.3871 | 0.0178 | 3.24E-10 |
| rs9399137 | C | T | -0.1148 | 0.2619 | 0.2619 | 0.0197 | 5.83E-09 |
| rs9406076 | T | C | 0.101 | 0.3278 | 0.3278 | 0.0185 | 4.65E-08 |
| rs9419374 | G | A | -0.1164 | 0.646 | 0.354 | 0.0185 | 3.44E-10 |
| rs9467545 | T | A | 0.2545 | 0.1572 | 0.1572 | 0.0237 | 7.39E-27 |
| rs9478282 | T | C | -0.1994 | 0.1116 | 0.1116 | 0.0279 | 8.70E-13 |
| rs9508495 | T | C | -0.1944 | 0.7569 | 0.2431 | 0.0204 | 1.34E-21 |
| rs951914 | C | G | 0.1904 | 0.7126 | 0.2874 | 0.0193 | 5.06E-23 |
| rs9526707 | A | G | -0.1217 | 0.3222 | 0.3222 | 0.0186 | 6.59E-11 |
| rs962369 | C | T | -0.1684 | 0.3013 | 0.3013 | 0.0189 | 6.02E-19 |
| rs964941 | A | G | 0.1726 | 0.5183 | 0.4817 | 0.0174 | 3.31E-23 |
| rs9791312 | C | A | 0.1225 | 0.3452 | 0.3452 | 0.0184 | 2.89E-11 |
| rs9841978 | A | G | 0.1766 | 0.3251 | 0.3251 | 0.0185 | 1.12E-21 |
| rs9889262 | A | T | 0.2283 | 0.3666 | 0.3666 | 0.018 | 7.11E-37 |
| rs9893005 | G | C | 0.1205 | 0.4647 | 0.4647 | 0.0176 | 7.90E-12 |
| rs9900637 | A | C | 0.0992 | 0.4961 | 0.4961 | 0.0176 | 1.73E-08 |
| rs990619 | G | C | 0.1592 | 0.5234 | 0.4766 | 0.0173 | 2.90E-20 |
| rs9918907 | G | A | 0.1188 | 0.2162 | 0.2162 | 0.021 | 1.59E-08 |
| rs9932220 | A | G | -0.1591 | 0.2177 | 0.2177 | 0.021 | 3.76E-14 |
| rs9937801 | C | T | -0.1554 | 0.4308 | 0.4308 | 0.0174 | 4.81E-19 |

a The variants together explain 6.6% of the variation in Diastolic Blood Pressure (R2 = 0.066; F (TOTAL) = 116.057).

b Increase in Diastolic Blood Pressure in per effect allele.

c Effect Allele Frequency

d Minor Allele Frequency

| Characteristics of the single nucleotide polymorphisms (SNP) used as instrumental variables for Ankylosing Spondylitisa |
| --- |

| SNP | Effect Allele | Other Allele | Effect (BETA)b | EAFc | MAFd | Standard Error | P-Value |
| --- | --- | --- | --- | --- | --- | --- | --- |
| rs113140854 | T | C | 1.2433 | 0.09639 | 0.09639 | 0.1122 | 1.63E-28 |
| rs115999992 | A | T | 4.9684 | 0.07861 | 0.07861 | 0.1536 | 1.00E-200 |
| rs2263324 | C | A | 3.9402 | 0.09638 | 0.09638 | 0.1379 | 1.73E-179 |
| rs3094653 | T | G | 0.6424 | 0.5671 | 0.4329 | 0.0642 | 1.39E-23 |
| rs73740587 | G | A | 1.4356 | 0.1261 | 0.1261 | 0.1006 | 3.68E-46 |
| rs9264277 | C | T | 0.5224 | 0.7297 | 0.2703 | 0.069 | 3.76E-14 |
| rs999943 | G | A | 0.4605 | 0.3498 | 0.3498 | 0.061 | 4.31E-14 |

a The variants together explain 5.6% of the variation in Ankylosing Spondylitis (R2 = 0.056; F (TOTAL) = 1841.894).

b Increase in odds of Ankylosing Spondylitis in per effect allele.

c Effect Allele Frequency

d Minor Allele Frequency

| Characteristics of the single nucleotide polymorphisms (SNP) used as instrumental variables for Allergic Disease (Asthma, Hay Fever or Eczema)a |
| --- |

| SNP | Effect Allele | Other Allele | Effect (BETA)b | EAFc | MAFd | Standard Error | P-Value |
| --- | --- | --- | --- | --- | --- | --- | --- |
| rs10033073 | G | A | 0.0437 | 0.6497 | 0.3503 | 0.0072 | 1.36E-09 |
| rs10174949 | A | G | -0.0656 | 0.3163 | 0.3163 | 0.0063 | 9.92E-26 |
| rs10414065 | T | C | -0.0917 | 0.07823 | 0.07823 | 0.012 | 2.29E-14 |
| rs10519067 | A | G | -0.0518 | 0.1395 | 0.1395 | 0.0085 | 1.10E-09 |
| rs1059513 | C | T | -0.0828 | 0.8895 | 0.1105 | 0.0094 | 1.15E-18 |
| rs10789841 | C | T | -0.0456 | 0.6905 | 0.3095 | 0.0064 | 1.48E-12 |
| rs10865050 | A | G | -0.1249 | 0.1531 | 0.1531 | 0.0084 | 6.37E-50 |
| rs11033545 | G | T | 0.0334 | 0.5578 | 0.4422 | 0.006 | 2.40E-08 |
| rs11168245 | G | C | -0.0472 | 0.801 | 0.199 | 0.007 | 1.41E-11 |
| rs11236814 | T | A | -0.0653 | 0.90816 | 0.09184 | 0.0098 | 3.25E-11 |
| rs11658582 | G | C | 0.0563 | 0.5663 | 0.4337 | 0.0059 | 2.07E-21 |
| rs12123821 | T | C | 0.1159 | 0.04762 | 0.04762 | 0.014 | 1.04E-16 |
| rs1214598 | A | G | -0.0401 | 0.3316 | 0.3316 | 0.006 | 2.14E-11 |
| rs12365699 | A | G | -0.0592 | 0.1531 | 0.1531 | 0.0078 | 3.54E-14 |
| rs12413578 | T | C | -0.0934 | 0.09864 | 0.09864 | 0.0094 | 3.31E-23 |
| rs12440045 | C | A | 0.0403 | 0.5476 | 0.4524 | 0.0059 | 7.68E-12 |
| rs12551834 | A | G | -0.0615 | 0.07993 | 0.07993 | 0.0103 | 2.72E-09 |
| rs12625547 | G | T | -0.0432 | 0.7857 | 0.2143 | 0.0077 | 1.98E-08 |
| rs1289273 | G | A | 0.035 | 0.5731 | 0.4269 | 0.0057 | 1.09E-09 |
| rs12941864 | T | C | -0.0335 | 0.466 | 0.466 | 0.0061 | 4.98E-08 |
| rs1419675 | T | G | -0.0385 | 0.2415 | 0.2415 | 0.007 | 4.72E-08 |
| rs144829310 | T | G | 0.0828 | 0.1565 | 0.1565 | 0.0078 | 2.60E-26 |
| rs1689510 | C | G | 0.051 | 0.3163 | 0.3163 | 0.0061 | 3.39E-17 |
| rs16903574 | G | C | 0.07 | 0.91837 | 0.08163 | 0.011 | 1.68E-10 |
| rs17664743 | A | G | 0.041 | 0.2041 | 0.2041 | 0.0071 | 8.27E-09 |
| rs1885013 | A | G | -0.0382 | 0.3588 | 0.3588 | 0.0063 | 1.33E-09 |
| rs2134814 | G | C | -0.0427 | 0.6463 | 0.3537 | 0.006 | 1.03E-12 |
| rs2212434 | T | C | 0.0869 | 0.4286 | 0.4286 | 0.0057 | 8.92E-52 |
| rs2221641 | T | C | -0.0419 | 0.3878 | 0.3878 | 0.0059 | 1.03E-12 |
| rs2241099 | G | C | -0.0697 | 0.7381 | 0.2619 | 0.0066 | 4.62E-26 |
| rs228619 | G | A | 0.0362 | 0.5306 | 0.4694 | 0.0057 | 2.41E-10 |
| rs2477923 | C | T | -0.0332 | 0.5017 | 0.4983 | 0.0057 | 7.23E-09 |
| rs249677 | A | C | 0.0366 | 0.3605 | 0.3605 | 0.0059 | 7.54E-10 |
| rs2766678 | A | G | -0.0559 | 0.2126 | 0.2126 | 0.0074 | 2.95E-14 |
| rs2854001 | A | G | 0.0537 | 0.1837 | 0.1837 | 0.0071 | 3.31E-14 |
| rs2910162 | G | A | 0.0344 | 0.6837 | 0.3163 | 0.0061 | 1.54E-08 |
| rs301802 | A | T | 0.048 | 0.4592 | 0.4592 | 0.0058 | 1.33E-16 |
| rs3024665 | T | C | 0.0665 | 0.07653 | 0.07653 | 0.0119 | 2.18E-08 |
| rs3128959 | A | G | -0.0601 | 0.1241 | 0.1241 | 0.0095 | 2.25E-10 |
| rs34004019 | G | A | -0.0913 | 0.6956 | 0.3044 | 0.0071 | 2.52E-38 |
| rs34290285 | A | G | -0.0766 | 0.2653 | 0.2653 | 0.0075 | 1.16E-24 |
| rs3540 | A | G | -0.0346 | 0.3452 | 0.3452 | 0.0061 | 1.28E-08 |
| rs4296977 | T | C | -0.0534 | 0.1582 | 0.1582 | 0.0082 | 6.92E-11 |
| rs479844 | G | A | 0.0412 | 0.5714 | 0.4286 | 0.0058 | 1.15E-12 |
| rs4943794 | C | G | 0.0396 | 0.2262 | 0.2262 | 0.007 | 1.41E-08 |
| rs4973380 | A | T | 0.0397 | 0.2432 | 0.2432 | 0.0067 | 2.59E-09 |
| rs519973 | A | G | 0.0358 | 0.3537 | 0.3537 | 0.006 | 3.23E-09 |
| rs56375023 | A | G | 0.0731 | 0.2126 | 0.2126 | 0.0068 | 3.11E-27 |
| rs5743618 | A | C | -0.0915 | 0.2993 | 0.2993 | 0.0067 | 2.73E-42 |
| rs5758343 | T | A | -0.0474 | 0.7823 | 0.2177 | 0.0071 | 2.17E-11 |
| rs58939053 | T | C | 0.0544 | 0.3435 | 0.3435 | 0.0061 | 3.85E-19 |
| rs6011033 | G | A | 0.0437 | 0.7755 | 0.2245 | 0.0069 | 2.66E-10 |
| rs61192126 | C | T | -0.0384 | 0.6905 | 0.3095 | 0.0064 | 1.56E-09 |
| rs61816766 | C | T | 0.142 | 0.97959 | 0.02041 | 0.0176 | 6.76E-16 |
| rs62626322 | G | T | 0.0674 | 0.90306 | 0.09694 | 0.0091 | 1.35E-13 |
| rs6461503 | C | T | -0.041 | 0.5272 | 0.4728 | 0.0057 | 8.81E-13 |
| rs6489785 | C | T | -0.0428 | 0.631 | 0.369 | 0.0059 | 3.57E-13 |
| rs6594499 | A | C | -0.0723 | 0.4813 | 0.4813 | 0.0057 | 1.10E-36 |
| rs6800001 | A | G | 0.033 | 0.3418 | 0.3418 | 0.0059 | 2.28E-08 |
| rs6881706 | T | G | -0.0707 | 0.2925 | 0.2925 | 0.0064 | 1.73E-28 |
| rs6990534 | G | A | -0.04 | 0.6429 | 0.3571 | 0.0063 | 1.74E-10 |
| rs7224129 | A | G | 0.0535 | 0.4728 | 0.4728 | 0.0057 | 8.11E-21 |
| rs72774901 | A | T | 0.1122 | 0.08163 | 0.08163 | 0.0108 | 3.92E-25 |
| rs740474 | T | C | -0.0361 | 0.4167 | 0.4167 | 0.0059 | 6.59E-10 |
| rs7406234 | C | T | -0.0337 | 0.5646 | 0.4354 | 0.0057 | 4.30E-09 |
| rs74847330 | G | A | -0.0497 | 0.8776 | 0.1224 | 0.0088 | 1.67E-08 |
| rs7521390 | C | A | 0.0358 | 0.716 | 0.284 | 0.0063 | 1.39E-08 |
| rs760805 | T | A | 0.0374 | 0.5782 | 0.4218 | 0.006 | 3.79E-10 |
| rs80064395 | T | C | -0.0726 | 0.05782 | 0.05782 | 0.0107 | 1.31E-11 |
| rs8030821 | T | A | 0.0337 | 0.6105 | 0.3895 | 0.006 | 1.54E-08 |
| rs848 | C | A | -0.0601 | 0.7636 | 0.2364 | 0.0073 | 1.62E-16 |
| rs9372120 | G | T | 0.0406 | 0.8248 | 0.1752 | 0.0071 | 1.02E-08 |
| rs9877752 | A | G | 0.0398 | 0.4116 | 0.4116 | 0.0058 | 4.98E-12 |

a The variants together explain 7.9% of the variation in Allergic Disease (Asthma, Hay Fever or Eczema) (R2 = 0.079; F (TOTAL) = 423.144).

b Increase in odds of Allergic Disease (Asthma, Hay Fever or Eczema) in per effect allele.

c Effect Allele Frequency

d Minor Allele Frequency

| Characteristics of the single nucleotide polymorphisms (SNP) used as instrumental variables for Systemic Lupus Erythematosusa |
| --- |

| SNP | Effect Allele | Other Allele | Effect (BETA)b | EAFc | MAFd | Standard Error | P-Value |
| --- | --- | --- | --- | --- | --- | --- | --- |
| rs10048743 | T | G | -0.231112 | 0.1412 | 0.1412 | 0.0412056 | 2.04E-08 |
| rs10200680 | T | C | -0.248461 | 0.8559 | 0.1441 | 0.0424835 | 4.96E-09 |
| rs1078324 | A | C | -0.71335 | 0.0497 | 0.0497 | 0.0781665 | 7.11E-20 |
| rs10912578 | G | A | -0.24686 | 0.3012 | 0.3012 | 0.0309918 | 1.65E-15 |
| rs1143679 | A | G | 0.582216 | 0.1312 | 0.1312 | 0.0399866 | 5.03E-48 |
| rs12094036 | C | T | -0.328504 | 0.0815 | 0.0815 | 0.0578595 | 1.37E-08 |
| rs12524498 | T | G | -0.673345 | 0.9891 | 0.0109 | 0.120793 | 2.48E-08 |
| rs13019891 | T | G | -0.562119 | 0.5487 | 0.4513 | 0.0290336 | 1.65E-83 |
| rs13136219 | T | C | -0.174353 | 0.6203 | 0.3797 | 0.027787 | 3.50E-10 |
| rs13332649 | G | A | -0.314711 | 0.8022 | 0.1978 | 0.0375683 | 5.43E-17 |
| rs143123127 | A | G | 0.470004 | 0.0308 | 0.0308 | 0.0840342 | 2.23E-08 |
| rs1464446 | T | G | -0.328504 | 0.1789 | 0.1789 | 0.0401497 | 2.79E-16 |
| rs150180633 | T | C | 0.928219 | 0.9831 | 0.0169 | 0.0689573 | 2.66E-41 |
| rs17849501 | T | C | 0.81093 | 0.9404 | 0.0596 | 0.0498642 | 1.81E-59 |
| rs2431697 | C | T | -0.223144 | 0.4314 | 0.4314 | 0.0292964 | 2.60E-14 |
| rs2459611 | T | C | 0.261365 | 0.1252 | 0.1252 | 0.045245 | 7.62E-09 |
| rs2573219 | C | A | 0.587787 | 0.0865 | 0.0865 | 0.0429292 | 1.13E-42 |
| rs268124 | T | C | 0.18633 | 0.2744 | 0.2744 | 0.0323703 | 8.60E-09 |
| rs2736332 | C | G | 0.277632 | 0.2694 | 0.2694 | 0.0320694 | 4.83E-18 |
| rs28361029 | A | G | -0.385662 | 0.0665 | 0.0665 | 0.0613604 | 3.27E-10 |
| rs28834423 | C | G | 0.457425 | 0.1829 | 0.1829 | 0.0365295 | 5.65E-36 |
| rs34703115 | C | T | -0.616186 | 0.0328 | 0.0328 | 0.104778 | 4.08E-09 |
| rs35000415 | T | C | 0.587787 | 0.8996 | 0.1004 | 0.041539 | 1.86E-45 |
| rs35251378 | A | G | -0.235722 | 0.2694 | 0.2694 | 0.0324266 | 3.61E-13 |
| rs353608 | G | A | 0.18633 | 0.5477 | 0.4523 | 0.0280198 | 2.93E-11 |
| rs3747093 | A | G | 0.262364 | 0.2018 | 0.2018 | 0.0345055 | 2.88E-14 |
| rs389884 | G | A | 0.928219 | 0.0736 | 0.0736 | 0.0432319 | 2.92E-102 |
| rs4274624 | T | C | -0.559616 | 0.2316 | 0.2316 | 0.0326791 | 9.73E-66 |
| rs4388254 | T | C | 0.378436 | 0.9294 | 0.0706 | 0.0603977 | 3.71E-10 |
| rs4661543 | G | T | 0.274437 | 0.8728 | 0.1272 | 0.0423755 | 9.40E-11 |
| rs4916215 | T | C | 0.223144 | 0.2545 | 0.2545 | 0.0339693 | 5.07E-11 |
| rs58688157 | G | A | -0.223144 | 0.7316 | 0.2684 | 0.0335647 | 2.97E-11 |
| rs58721818 | T | C | 0.65752 | 0.9751 | 0.0249 | 0.0755941 | 3.38E-18 |
| rs597808 | G | A | -0.162519 | 0.5338 | 0.4662 | 0.0294736 | 3.51E-08 |
| rs6671847 | A | G | 0.198851 | 0.4871 | 0.4871 | 0.0289651 | 6.64E-12 |
| rs6679677 | A | C | 0.336472 | 0.0915 | 0.0915 | 0.0464854 | 4.55E-13 |
| rs6889239 | C | T | 0.277632 | 0.2575 | 0.2575 | 0.03174 | 2.19E-18 |
| rs7097397 | A | G | -0.18633 | 0.3956 | 0.3956 | 0.0287118 | 8.60E-11 |
| rs73050535 | T | C | -0.71335 | 0.9702 | 0.0298 | 0.124134 | 9.11E-09 |
| rs73068668 | A | G | -0.314711 | 0.0954 | 0.0954 | 0.0574903 | 4.40E-08 |
| rs7768653 | T | C | -0.207014 | 0.4016 | 0.4016 | 0.0296891 | 3.11E-12 |
| rs7823055 | T | G | -0.350657 | 0.4235 | 0.4235 | 0.0286208 | 1.64E-34 |
| rs7899626 | T | C | 0.182322 | 0.6372 | 0.3628 | 0.0332532 | 4.19E-08 |
| rs9852014 | G | A | 0.620577 | 0.9254 | 0.0746 | 0.0492727 | 2.26E-36 |

a The variants together explain 9.7% of the variation in Systemic Lupus Erythematosus (R2 = 0.097; F (TOTAL) = 34.585).

b Increase in odds of Systemic Lupus Erythematosus in per effect allele.

c Effect Allele Frequency

d Minor Allele Frequency

| Characteristics of the single nucleotide polymorphisms (SNP) used as instrumental variables for Primary Sclerosing Cholangitisa   | SNP | Effect Allele | Other Allele | Effect (BETA)b | EAFc | MAFd | Standard Error | P-Value | | --- | --- | --- | --- | --- | --- | --- | --- | | rs10909839 | A | G | -0.18648 | 0.31 | 0.31 | 0.034 | 3.16E-08 | | rs114581973 | T | C | -0.534151 | 0.03 | 0.03 | 0.102 | 3.40E-08 | | rs13119723 | G | A | -0.27079 | 0.16 | 0.16 | 0.044 | 2.22E-10 | | rs139010734 | T | C | 3.35536 | 0.02 | 0.02 | 0.14 | 1.98E-154 | | rs145832854 | A | G | -0.624333 | 0.02 | 0.02 | 0.119 | 2.58E-08 | | rs231389 | T | C | -0.206201 | 0.75 | 0.25 | 0.036 | 4.42E-09 | | rs3131781 | G | A | 1.06953 | 0.14 | 0.14 | 0.037 | 1.00E-200 | | rs313839 | G | C | -0.279146 | 0.16 | 0.16 | 0.051 | 2.12E-08 | | rs3184504 | C | T | -0.18648 | 0.5 | 0.5 | 0.03 | 5.05E-10 | | rs34645399 | G | A | 0.746688 | 0.08 | 0.08 | 0.047 | 1.63E-59 | | rs41316239 | A | G | -0.568151 | 0.04 | 0.04 | 0.09 | 4.97E-11 | | rs4147359 | A | G | 0.216723 | 0.36 | 0.36 | 0.03 | 4.06E-13 | | rs4817988 | A | G | -0.314811 | 0.27 | 0.27 | 0.041 | 4.20E-15 | | rs725613 | G | T | -0.198031 | 0.35 | 0.35 | 0.033 | 5.50E-10 | | rs72837826 | T | G | 0.303801 | 0.11 | 0.11 | 0.051 | 1.26E-09 | | rs79940565 | C | T | 0.76314 | 0.01 | 0.01 | 0.146 | 2.00E-08 | | rs80060485 | C | T | 0.345715 | 0.07 | 0.07 | 0.062 | 8.54E-09 | | rs9858213 | T | G | 0.283674 | 0.3 | 0.3 | 0.031 | 2.43E-20 | |
| --- | --- | --- | --- | --- | --- | --- | --- | --- | --- | --- | --- | --- | --- | --- | --- | --- | --- | --- | --- | --- | --- | --- | --- | --- | --- | --- | --- | --- | --- | --- | --- | --- | --- | --- | --- | --- | --- | --- | --- | --- | --- | --- | --- | --- | --- | --- | --- | --- | --- | --- | --- | --- | --- | --- | --- | --- | --- | --- | --- | --- | --- | --- | --- | --- | --- | --- | --- | --- | --- | --- | --- | --- | --- | --- | --- | --- | --- | --- | --- | --- | --- | --- | --- | --- | --- | --- | --- | --- | --- | --- | --- | --- | --- | --- | --- | --- | --- | --- | --- | --- | --- | --- | --- | --- | --- | --- | --- | --- | --- | --- | --- | --- | --- | --- | --- | --- | --- | --- | --- | --- | --- | --- | --- | --- | --- | --- | --- | --- | --- | --- | --- | --- | --- | --- | --- | --- | --- | --- | --- | --- | --- | --- | --- | --- | --- | --- | --- | --- | --- | --- | --- | --- |

a The variants together explain 1.6% of the variation in Primary Sclerosing Cholangitis (R2 = 0.016; F (TOTAL) = 13.434).

b Increase in odds of Primary Sclerosing Cholangitis in per effect allele.

c Effect Allele Frequency

d Minor Allele Frequency

| Characteristics of the single nucleotide polymorphisms (SNP) used as instrumental variables for Celiac Diseasea |
| --- |

| SNP | Effect Allele | Other Allele | Effect (BETA)b | EAFc | MAFd | Standard Error | P-Value |
| --- | --- | --- | --- | --- | --- | --- | --- |
| rs10752747 | T | G | -0.116197 | 0.3088 | 0.3088 | 0.0198763 | 5.05E-09 |
| rs10892258 | A | G | -0.149545 | 0.2331 | 0.2331 | 0.0222305 | 1.73E-11 |
| rs11979905 | G | A | 0.162969 | 0.1076 | 0.1076 | 0.0292373 | 2.49E-08 |
| rs12527282 | T | C | -0.154551 | 0.2799 | 0.2799 | 0.0209646 | 1.69E-13 |
| rs12663317 | C | A | -0.615816 | 0.08466 | 0.08466 | 0.0426761 | 3.53E-47 |
| rs130078 | G | C | -0.577322 | 0.7809 | 0.2191 | 0.0242572 | 3.35E-125 |
| rs13030124 | A | G | -0.105138 | 0.4502 | 0.4502 | 0.018842 | 2.40E-08 |
| rs13119723 | G | A | -0.308838 | 0.1534 | 0.1534 | 0.0277233 | 7.60E-29 |
| rs13198474 | A | G | 0.946238 | 0.05478 | 0.05478 | 0.0311878 | 1.00E-200 |
| rs2441467 | C | T | 0.105261 | 0.4183 | 0.4183 | 0.0186632 | 1.70E-08 |
| rs6498114 | T | G | -0.131028 | 0.756 | 0.244 | 0.0211506 | 5.83E-10 |
| rs6926336 | C | T | -0.812156 | 0.02191 | 0.02191 | 0.0804912 | 6.12E-24 |
| rs7162232 | A | G | -0.116894 | 0.6813 | 0.3187 | 0.0202624 | 7.97E-09 |
| rs9296009 | T | A | -0.953993 | 0.2341 | 0.2341 | 0.0289352 | 1.00E-200 |
| rs931 | A | G | 0.618424 | 0.3068 | 0.3068 | 0.0197579 | 1.00E-200 |

a The variants together explain 13.3% of the variation in Celiac Disease (R2 = 0.133; F (TOTAL) = 206.667).

b Increase in odds of Celiac Disease in per effect allele.

c Effect Allele Frequency

d Minor Allele Frequency

| Characteristics of the single nucleotide polymorphisms (SNP) used as instrumental variables for Alzheimer's Diseasea |
| --- |

| SNP | Effect Allele | Other Allele | Effect (BETA)b | EAFc | MAFd | Standard Error | P-Value |
| --- | --- | --- | --- | --- | --- | --- | --- |
| rs1081105 | C | A | 0.942 | 0.9692 | 0.0308 | 0.0436 | 1.51E-103 |
| rs111278137 | A | G | -0.4735 | 0.0139 | 0.0139 | 0.0713 | 3.20E-11 |
| rs11257242 | G | C | 0.0841 | 0.6511 | 0.3489 | 0.0154 | 4.64E-08 |
| rs114812713 | C | G | 0.298 | 0.6511 | 0.3489 | 0.0431 | 4.47E-12 |
| rs11767557 | C | T | -0.1028 | 0.2177 | 0.2177 | 0.0182 | 1.56E-08 |
| rs12151021 | G | A | -0.1071 | 0.3380 | 0.338 | 0.0169 | 2.56E-10 |
| rs12590654 | A | G | -0.0906 | 0.3370 | 0.337 | 0.0157 | 8.73E-09 |
| rs139136389 | T | C | -0.4938 | 0.9742 | 0.0258 | 0.0851 | 6.43E-09 |
| rs147711004 | A | G | 1.1354 | 0.0288 | 0.0288 | 0.0366 | 1.00E-200 |
| rs150685845 | G | A | 0.5561 | 0.9871 | 0.0129 | 0.0645 | 6.62E-18 |
| rs1582763 | A | G | -0.1232 | 0.6372 | 0.3628 | 0.0149 | 1.19E-16 |
| rs3740688 | T | G | 0.0935 | 0.4573 | 0.4573 | 0.0144 | 9.70E-11 |
| rs3851179 | C | T | 0.1198 | 0.3708 | 0.3708 | 0.0148 | 5.81E-16 |
| rs6733839 | T | C | 0.1693 | 0.6203 | 0.3797 | 0.0154 | 4.02E-28 |
| rs679515 | C | T | -0.1508 | 0.8280 | 0.172 | 0.0183 | 1.55E-16 |
| rs72654445 | A | G | -0.5425 | 0.0109 | 0.0109 | 0.0811 | 2.27E-11 |
| rs73223431 | T | C | 0.0936 | 0.6541 | 0.3459 | 0.0153 | 8.34E-10 |
| rs7412 | T | C | -0.4673 | 0.9374 | 0.0626 | 0.0305 | 6.40E-53 |
| rs867230 | A | C | 0.1333 | 0.5984 | 0.4016 | 0.0158 | 3.49E-17 |
| rs9381563 | T | C | -0.0821 | 0.3221 | 0.3221 | 0.0148 | 2.93E-08 |

a The variants together explain 3.8% of the variation in Alzheimer's Disease (R2 = 0.038; F (TOTAL) = 126.216).

b Increase in odds of Alzheimer's Disease in per effect allele.

c Effect Allele Frequency

d Minor Allele Frequency

| Characteristics of the single nucleotide polymorphisms (SNP) used as instrumental variables for Schizophreniaa |
| --- |

| SNP | Effect Allele | Other Allele | Effect (BETA)b | EAFc | MAFd | Standard Error | P-Value |
| --- | --- | --- | --- | --- | --- | --- | --- |
| rs1000237 | A | T | 0.0732053 | 0.355 | 0.355 | 0.0089 | 2.80E-16 |
| rs10035564 | G | A | 0.0668024 | 0.331 | 0.331 | 0.0092 | 4.38E-13 |
| rs10086619 | G | A | 0.0722052 | 0.161 | 0.161 | 0.0116 | 4.97E-10 |
| rs10103330 | A | T | 0.067305 | 0.194 | 0.194 | 0.0108 | 5.07E-10 |
| rs10103330 | A | T | 0.067305 | 0.194 | 0.194 | 0.0108 | 5.07E-10 |
| rs10117 | A | G | -0.0549994 | 0.398 | 0.398 | 0.0088 | 4.66E-10 |
| rs10861176 | A | G | 0.0555021 | 0.737 | 0.263 | 0.0098 | 1.59E-08 |
| rs10873538 | G | T | 0.0665031 | 0.334 | 0.334 | 0.0091 | 3.01E-13 |
| rs10876446 | C | G | 0.0540022 | 0.312 | 0.312 | 0.0094 | 1.03E-08 |
| rs10957321 | A | G | 0.0475949 | 0.511 | 0.489 | 0.0086 | 3.48E-08 |
| rs11027839 | C | A | 0.0515038 | 0.5 | 0.5 | 0.0086 | 2.40E-09 |
| rs11136325 | A | G | -0.0537967 | 0.579 | 0.421 | 0.0091 | 3.05E-09 |
| rs11165867 | T | C | 0.0743034 | 0.16 | 0.16 | 0.0116 | 1.30E-10 |
| rs11191580 | C | T | -0.131703 | 0.09 | 0.09 | 0.0155 | 1.77E-17 |
| rs11210892 | A | G | -0.0635005 | 0.67 | 0.33 | 0.0091 | 2.68E-12 |
| rs113264400 | C | T | 0.112296 | 0.048 | 0.048 | 0.0202 | 2.86E-08 |
| rs11587347 | G | C | 0.103895 | 0.094 | 0.094 | 0.0147 | 1.53E-12 |
| rs11664298 | A | G | 0.0773995 | 0.193 | 0.193 | 0.0108 | 8.94E-13 |
| rs11693094 | T | C | -0.054403 | 0.461 | 0.461 | 0.0087 | 4.29E-10 |
| rs11696755 | C | T | 0.0636962 | 0.184 | 0.184 | 0.011 | 7.26E-09 |
| rs11740474 | T | A | 0.0536962 | 0.415 | 0.415 | 0.0088 | 1.13E-09 |
| rs11941714 | A | G | -0.0515957 | 0.336 | 0.336 | 0.0093 | 3.07E-08 |
| rs1198588 | T | A | 0.102598 | 0.788 | 0.212 | 0.0108 | 1.73E-21 |
| rs12129573 | A | C | 0.0777994 | 0.366 | 0.366 | 0.0089 | 2.28E-18 |
| rs12138231 | A | T | 0.0669949 | 0.817 | 0.183 | 0.0116 | 7.99E-09 |
| rs12151767 | A | G | -0.0611045 | 0.487 | 0.487 | 0.0086 | 1.31E-12 |
| rs12285419 | A | C | 0.0849045 | 0.188 | 0.188 | 0.011 | 1.05E-14 |
| rs12293670 | G | A | -0.0704957 | 0.34 | 0.34 | 0.0092 | 1.56E-14 |
| rs12303743 | C | G | 0.0874988 | 0.094 | 0.094 | 0.0145 | 1.59E-09 |
| rs12489270 | C | T | 0.0579046 | 0.375 | 0.375 | 0.0089 | 7.47E-11 |
| rs12652777 | C | T | -0.0487997 | 0.522 | 0.478 | 0.0086 | 1.52E-08 |
| rs12712510 | C | T | -0.0574006 | 0.527 | 0.473 | 0.0087 | 5.14E-11 |
| rs12771371 | A | G | -0.0524027 | 0.311 | 0.311 | 0.0093 | 1.94E-08 |
| rs12833624 | T | C | 0.0501992 | 0.342 | 0.342 | 0.009 | 2.77E-08 |
| rs12877581 | C | G | 0.0596014 | 0.277 | 0.277 | 0.0099 | 1.80E-09 |
| rs12883788 | T | C | 0.0613011 | 0.458 | 0.458 | 0.0087 | 1.86E-12 |
| rs13011472 | G | C | 0.070401 | 0.484 | 0.484 | 0.0087 | 4.28E-16 |
| rs13016542 | C | T | -0.0883039 | 0.136 | 0.136 | 0.0129 | 8.28E-12 |
| rs13107325 | T | C | 0.158703 | 0.067 | 0.067 | 0.0168 | 2.90E-21 |
| rs13195636 | C | A | -0.210504 | 0.091 | 0.091 | 0.0159 | 6.55E-40 |
| rs13233308 | T | C | -0.0487044 | 0.484 | 0.484 | 0.0086 | 1.75E-08 |
| rs132582 | T | C | -0.0509972 | 0.545 | 0.455 | 0.0086 | 3.26E-09 |
| rs1427633 | C | G | -0.0483043 | 0.593 | 0.407 | 0.0088 | 4.10E-08 |
| rs1430894 | T | C | 0.0532953 | 0.483 | 0.483 | 0.0086 | 6.15E-10 |
| rs145071536 | C | T | 0.0851005 | 0.192 | 0.192 | 0.012 | 1.62E-12 |
| rs1451488 | G | A | 0.0708947 | 0.555 | 0.445 | 0.0087 | 4.47E-16 |
| rs149165 | G | T | -0.0481995 | 0.446 | 0.446 | 0.0087 | 3.00E-08 |
| rs1540840 | C | G | -0.0556996 | 0.475 | 0.475 | 0.0093 | 2.21E-09 |
| rs1593304 | G | A | 0.0641013 | 0.801 | 0.199 | 0.0111 | 7.45E-09 |
| rs1604060 | G | A | 0.0772051 | 0.885 | 0.115 | 0.014 | 3.24E-08 |
| rs1611236 | A | G | -0.0551035 | 0.314 | 0.314 | 0.0096 | 8.47E-09 |
| rs1615350 | T | C | -0.0736036 | 0.744 | 0.256 | 0.0098 | 4.92E-14 |
| rs167924 | G | A | 0.0501992 | 0.631 | 0.369 | 0.009 | 2.34E-08 |
| rs16851048 | C | T | 0.0744973 | 0.195 | 0.195 | 0.0107 | 4.15E-12 |
| rs16867571 | G | A | -0.0657035 | 0.235 | 0.235 | 0.0104 | 2.68E-10 |
| rs17194490 | T | G | 0.0781994 | 0.161 | 0.161 | 0.0116 | 1.80E-11 |
| rs17731 | A | G | 0.0523992 | 0.365 | 0.365 | 0.0089 | 4.37E-09 |
| rs1860002 | T | C | -0.0837987 | 0.543 | 0.457 | 0.0087 | 1.04E-21 |
| rs187557 | T | C | -0.0666956 | 0.848 | 0.152 | 0.0119 | 2.03E-08 |
| rs1881046 | T | G | -0.0507026 | 0.34 | 0.34 | 0.0092 | 3.39E-08 |
| rs1892346 | A | T | 0.0484027 | 0.564 | 0.436 | 0.0088 | 3.56E-08 |
| rs1901512 | C | T | -0.058401 | 0.699 | 0.301 | 0.0094 | 5.72E-10 |
| rs1914399 | G | C | -0.0491044 | 0.521 | 0.479 | 0.0087 | 1.40E-08 |
| rs1915019 | G | A | -0.0570984 | 0.75 | 0.25 | 0.0098 | 6.57E-09 |
| rs1953205 | A | T | 0.0499048 | 0.485 | 0.485 | 0.0089 | 2.21E-08 |
| rs2053079 | G | A | 0.0598986 | 0.237 | 0.237 | 0.0101 | 3.01E-09 |
| rs2078266 | G | A | -0.0696007 | 0.829 | 0.171 | 0.0126 | 2.94E-08 |
| rs215412 | A | G | 0.0577033 | 0.328 | 0.328 | 0.0091 | 2.69E-10 |
| rs2167378 | T | C | -0.0648978 | 0.439 | 0.439 | 0.0087 | 7.30E-14 |
| rs217336 | A | C | -0.0503033 | 0.434 | 0.434 | 0.0087 | 8.05E-09 |
| rs2252074 | G | T | 0.0685037 | 0.395 | 0.395 | 0.0088 | 6.19E-15 |
| rs2332700 | G | C | -0.0750982 | 0.753 | 0.247 | 0.0099 | 3.88E-14 |
| rs2333321 | G | A | -0.0712038 | 0.792 | 0.208 | 0.0105 | 1.25E-11 |
| rs2381411 | C | T | 0.050399 | 0.402 | 0.402 | 0.0088 | 1.25E-08 |
| rs2455415 | T | C | 0.0494949 | 0.413 | 0.413 | 0.0088 | 1.69E-08 |
| rs2456020 | T | C | -0.0815984 | 0.241 | 0.241 | 0.0102 | 1.13E-15 |
| rs2514218 | T | C | -0.0704957 | 0.344 | 0.344 | 0.0092 | 1.35E-14 |
| rs2710323 | C | T | -0.0784044 | 0.49 | 0.49 | 0.0086 | 1.23E-19 |
| rs2815731 | A | C | -0.0600033 | 0.358 | 0.358 | 0.0091 | 4.39E-11 |
| rs2909457 | A | G | -0.0489997 | 0.564 | 0.436 | 0.0087 | 1.48E-08 |
| rs2999392 | T | C | 0.0517987 | 0.691 | 0.309 | 0.0094 | 3.05E-08 |
| rs308697 | A | C | -0.0501036 | 0.436 | 0.436 | 0.0087 | 8.83E-09 |
| rs34555420 | T | G | -0.168696 | 0.075 | 0.075 | 0.0173 | 1.54E-22 |
| rs34555420 | T | G | -0.168696 | 0.075 | 0.075 | 0.0173 | 1.54E-22 |
| rs35351411 | C | A | 0.0635044 | 0.544 | 0.456 | 0.0087 | 2.21E-13 |
| rs35426637 | T | G | -0.0622985 | 0.324 | 0.324 | 0.0093 | 2.15E-11 |
| rs35734242 | C | T | 0.050704 | 0.426 | 0.426 | 0.0089 | 1.37E-08 |
| rs3739118 | A | G | -0.057004 | 0.291 | 0.291 | 0.0095 | 2.36E-09 |
| rs3770754 | G | C | -0.052896 | 0.368 | 0.368 | 0.0091 | 5.35E-09 |
| rs3791710 | C | T | -0.0600033 | 0.203 | 0.203 | 0.0108 | 3.02E-08 |
| rs3795310 | T | C | -0.0509972 | 0.463 | 0.463 | 0.0087 | 5.75E-09 |
| rs3802924 | C | A | -0.0736036 | 0.212 | 0.212 | 0.0108 | 9.58E-12 |
| rs3814883 | T | C | -0.0670977 | 0.467 | 0.467 | 0.0087 | 1.58E-14 |
| rs3824451 | C | T | 0.0655951 | 0.153 | 0.153 | 0.0118 | 2.54E-08 |
| rs4129585 | C | A | -0.0749962 | 0.562 | 0.438 | 0.0087 | 5.11E-18 |
| rs4575535 | G | A | 0.0557982 | 0.704 | 0.296 | 0.0096 | 5.77E-09 |
| rs4632195 | T | C | 0.0471964 | 0.52 | 0.48 | 0.0086 | 4.59E-08 |
| rs4636654 | A | G | -0.0483043 | 0.402 | 0.402 | 0.0089 | 4.89E-08 |
| rs4653164 | T | C | 0.0511038 | 0.668 | 0.332 | 0.0092 | 3.08E-08 |
| rs4700418 | G | C | 0.0701972 | 0.493 | 0.493 | 0.0087 | 5.37E-16 |
| rs4702 | A | G | -0.0843044 | 0.56 | 0.44 | 0.0089 | 2.79E-21 |
| rs4766428 | T | C | 0.0750038 | 0.441 | 0.441 | 0.0089 | 3.93E-17 |
| rs4779050 | G | T | -0.0579953 | 0.633 | 0.367 | 0.0089 | 7.27E-11 |
| rs4812325 | A | G | 0.0719042 | 0.616 | 0.384 | 0.0089 | 8.96E-16 |
| rs4921741 | G | A | 0.0559991 | 0.261 | 0.261 | 0.0098 | 1.21E-08 |
| rs498591 | T | A | 0.0724954 | 0.146 | 0.146 | 0.0121 | 2.11E-09 |
| rs500102 | C | T | -0.0517002 | 0.591 | 0.409 | 0.0088 | 4.87E-09 |
| rs505061 | A | C | 0.0534957 | 0.488 | 0.488 | 0.0086 | 5.80E-10 |
| rs56205728 | A | G | 0.0630037 | 0.287 | 0.287 | 0.0097 | 1.01E-10 |
| rs56335113 | G | A | -0.064701 | 0.697 | 0.303 | 0.0094 | 6.02E-12 |
| rs57433322 | G | C | -0.0830996 | 0.122 | 0.122 | 0.0139 | 1.99E-09 |
| rs5751191 | C | T | 0.0655951 | 0.501 | 0.499 | 0.0086 | 3.00E-14 |
| rs58120505 | C | T | -0.089603 | 0.418 | 0.418 | 0.0088 | 2.24E-24 |
| rs6001259 | T | C | 0.1915 | 0.016 | 0.016 | 0.0348 | 3.70E-08 |
| rs6010045 | C | T | 0.0548998 | 0.698 | 0.302 | 0.0095 | 7.44E-09 |
| rs60135207 | T | G | -0.0495994 | 0.415 | 0.415 | 0.0088 | 1.53E-08 |
| rs61857878 | T | A | -0.0600974 | 0.254 | 0.254 | 0.0102 | 4.44E-09 |
| rs61937595 | T | C | -0.130098 | 0.092 | 0.092 | 0.0162 | 1.15E-15 |
| rs62018952 | C | T | 0.0584027 | 0.726 | 0.274 | 0.0097 | 1.94E-09 |
| rs62183855 | C | A | -0.0660967 | 0.192 | 0.192 | 0.0111 | 2.66E-09 |
| rs634940 | T | G | 0.0663962 | 0.252 | 0.252 | 0.0099 | 1.78E-11 |
| rs6482437 | C | A | 0.0989036 | 0.888 | 0.112 | 0.0142 | 3.33E-12 |
| rs6538539 | T | G | -0.0567961 | 0.549 | 0.451 | 0.0086 | 4.43E-11 |
| rs6546857 | G | A | 0.0603978 | 0.232 | 0.232 | 0.0102 | 2.74E-09 |
| rs6549963 | C | T | -0.0483043 | 0.416 | 0.416 | 0.0088 | 4.31E-08 |
| rs6673880 | G | A | 0.062301 | 0.495 | 0.495 | 0.0091 | 7.19E-12 |
| rs6715366 | A | G | 0.0540972 | 0.267 | 0.267 | 0.0097 | 2.49E-08 |
| rs6721531 | T | A | -0.0517002 | 0.341 | 0.341 | 0.0091 | 1.47E-08 |
| rs6798742 | G | A | 0.0610991 | 0.307 | 0.307 | 0.0093 | 4.57E-11 |
| rs6943762 | C | T | -0.105098 | 0.13 | 0.13 | 0.0132 | 1.57E-15 |
| rs6974218 | C | A | -0.0548953 | 0.382 | 0.382 | 0.0089 | 6.80E-10 |
| rs6984242 | A | G | -0.0546965 | 0.6 | 0.4 | 0.0087 | 3.85E-10 |
| rs708228 | T | C | 0.0527997 | 0.329 | 0.329 | 0.0091 | 6.56E-09 |
| rs7112616 | C | T | -0.0522034 | 0.498 | 0.498 | 0.0086 | 1.52E-09 |
| rs7113199 | C | A | -0.0522983 | 0.704 | 0.296 | 0.0094 | 2.80E-08 |
| rs7251 | G | C | -0.0641009 | 0.328 | 0.328 | 0.0094 | 8.29E-12 |
| rs72802868 | T | G | -0.0691995 | 0.294 | 0.294 | 0.0096 | 4.55E-13 |
| rs728055 | A | T | -0.0673969 | 0.358 | 0.358 | 0.009 | 8.85E-14 |
| rs72943392 | C | G | 0.0534957 | 0.289 | 0.289 | 0.0096 | 2.39E-08 |
| rs72986630 | T | C | 0.112296 | 0.068 | 0.068 | 0.0179 | 3.59E-10 |
| rs73229090 | A | C | -0.102602 | 0.112 | 0.112 | 0.0142 | 4.34E-13 |
| rs73292401 | A | T | 0.0676045 | 0.192 | 0.192 | 0.0109 | 5.48E-10 |
| rs7515363 | T | C | -0.0535029 | 0.619 | 0.381 | 0.0089 | 1.84E-09 |
| rs7575796 | G | A | -0.0963006 | 0.094 | 0.094 | 0.0172 | 2.07E-08 |
| rs7634476 | G | A | 0.0577033 | 0.586 | 0.414 | 0.0088 | 5.46E-11 |
| rs7647398 | T | C | -0.0774979 | 0.2 | 0.2 | 0.0109 | 1.07E-12 |
| rs778371 | G | A | 0.0806029 | 0.286 | 0.286 | 0.0095 | 1.49E-17 |
| rs7798283 | G | T | -0.074003 | 0.133 | 0.133 | 0.0134 | 3.49E-08 |
| rs79210963 | C | T | 0.0856015 | 0.108 | 0.108 | 0.0137 | 4.14E-10 |
| rs79445414 | C | T | 0.1234 | 0.04 | 0.04 | 0.0222 | 2.80E-08 |
| rs8055219 | A | G | 0.0665031 | 0.229 | 0.229 | 0.0101 | 5.69E-11 |
| rs8138941 | A | G | 0.0580953 | 0.204 | 0.204 | 0.0106 | 4.46E-08 |
| rs9304548 | A | C | -0.0567016 | 0.748 | 0.252 | 0.01 | 1.59E-08 |
| rs9318627 | C | A | -0.0611986 | 0.4 | 0.4 | 0.0088 | 4.35E-12 |
| rs9454727 | G | A | -0.054403 | 0.273 | 0.273 | 0.0098 | 3.35E-08 |
| rs9461916 | C | T | 0.0532953 | 0.594 | 0.406 | 0.0088 | 1.64E-09 |
| rs9636107 | G | A | 0.0698969 | 0.471 | 0.471 | 0.0086 | 5.11E-16 |
| rs9687282 | G | T | 0.0525994 | 0.334 | 0.334 | 0.0091 | 7.33E-09 |
| rs9876421 | T | C | 0.0625033 | 0.343 | 0.343 | 0.0092 | 9.19E-12 |

a The variants together explain 2.1% of the variation in Schizophrenia (R2 = 0.021; F (TOTAL) = 16.872).

b Increase in odds of Schizophrenia in per effect allele.

c Effect Allele Frequency

d Minor Allele Frequency

| Characteristics of the single nucleotide polymorphisms (SNP) used as instrumental variables for Ischemic Strokea |
| --- |

| SNP | Effect Allele | Other Allele | Effect (BETA)b | EAFc | MAFd | Standard Error | P-Value |
| --- | --- | --- | --- | --- | --- | --- | --- |
| rs1052053 | G | A | -0.0576 | 0.401 | 0.401 | 0.0087 | 4.48E-11 |
| rs1053007 | G | A | 0.0479 | 0.6506 | 0.3494 | 0.0087 | 3.58E-08 |
| rs11957829 | G | A | -0.0719 | 0.1761 | 0.1761 | 0.0124 | 7.51E-09 |
| rs12445022 | A | G | 0.0609 | 0.3057 | 0.3057 | 0.0095 | 1.28E-10 |
| rs17035646 | A | G | 0.0536 | 0.405 | 0.405 | 0.0088 | 1.34E-09 |
| rs2005108 | T | C | 0.08 | 0.1281 | 0.1281 | 0.0145 | 3.33E-08 |
| rs2107595 | A | G | 0.0759 | 0.2264 | 0.2264 | 0.0102 | 9.25E-14 |
| rs3184504 | C | T | -0.0751 | 0.5479 | 0.4521 | 0.0098 | 2.17E-14 |
| rs35436 | T | C | -0.0495 | 0.3814 | 0.3814 | 0.0089 | 3.21E-08 |
| rs42039 | T | C | -0.0656 | 0.2277 | 0.2277 | 0.0113 | 6.55E-09 |
| rs4932370 | A | G | 0.0519 | 0.333 | 0.333 | 0.0094 | 2.88E-08 |
| rs4959130 | A | G | 0.0832 | 0.1372 | 0.1372 | 0.014 | 2.83E-09 |
| rs6825454 | C | T | 0.0564 | 0.3078 | 0.3078 | 0.0092 | 7.43E-10 |
| rs6847935 | T | A | 0.0784 | 0.3257 | 0.3257 | 0.0096 | 3.50E-16 |
| rs7304841 | C | A | -0.0484 | 0.407 | 0.407 | 0.0089 | 4.93E-08 |
| rs7859727 | T | C | 0.0514 | 0.5355 | 0.4645 | 0.0084 | 1.05E-09 |
| rs9526212 | G | A | 0.0615 | 0.7614 | 0.2386 | 0.0101 | 9.19E-10 |
| rs9909858 | C | T | 0.0893 | 0.188 | 0.188 | 0.0162 | 3.63E-08 |

a The variants together explain 2.0% of the variation in Ischemic Stroke (R2 = 0.020; F (TOTAL) = 490.759).

b Increase in odds of Ischemic Stroke in per effect allele.

c Effect Allele Frequency

d Minor Allele Frequency

| Characteristics of the single nucleotide polymorphisms (SNP) used as instrumental variables for Multiple Sclerosisa |
| --- |

| SNP | Effect Allele | Other Allele | Effect (BETA)b | EAFc | MAFd | Standard Error | P-Value |
| --- | --- | --- | --- | --- | --- | --- | --- |
| rs1077667 | T | C | -0.1489 | 0.2126 | 0.2126 | 0.02119 | 2.13E-12 |
| rs11129295 | T | C | 0.1092 | 0.3568 | 0.3568 | 0.01913 | 1.14E-08 |
| rs11154801 | A | C | 0.1366 | 0.36095 | 0.36095 | 0.01931 | 1.53E-12 |
| rs11581062 | G | A | 0.1254 | 0.2886 | 0.2886 | 0.02002 | 3.75E-10 |
| rs1265110 | T | C | -0.1934 | 0.1282 | 0.1282 | 0.02684 | 5.87E-13 |
| rs12746893 | C | T | 0.1412 | 0.2539 | 0.2539 | 0.02038 | 4.18E-12 |
| rs1335532 | G | A | -0.1634 | 0.1285 | 0.1285 | 0.02725 | 2.01E-09 |
| rs17066096 | G | A | 0.1278 | 0.24445 | 0.24445 | 0.02035 | 3.42E-10 |
| rs1738074 | C | T | 0.1239 | 0.566 | 0.434 | 0.01888 | 5.27E-11 |
| rs1800693 | C | T | 0.1112 | 0.4003 | 0.4003 | 0.01744 | 1.84E-10 |
| rs2119704 | A | C | -0.2335 | 0.07605 | 0.07605 | 0.0372 | 3.46E-10 |
| rs2248359 | T | C | -0.1118 | 0.39175 | 0.39175 | 0.01914 | 5.15E-09 |
| rs2281389 | G | A | 0.156 | 0.17335 | 0.17335 | 0.02199 | 1.29E-12 |
| rs2293370 | A | G | -0.15 | 0.19545 | 0.19545 | 0.0246 | 1.08E-09 |
| rs3118470 | C | T | 0.1157 | 0.3169 | 0.3169 | 0.0193 | 2.05E-09 |
| rs3134954 | T | C | -0.7277 | 0.85825 | 0.14175 | 0.02178 | 1.00E-200 |
| rs4613763 | C | T | 0.1937 | 0.12795 | 0.12795 | 0.02587 | 6.86E-14 |
| rs4648356 | A | C | -0.1494 | 0.3348 | 0.3348 | 0.01967 | 3.10E-14 |
| rs4713240 | G | A | -0.2099 | 0.24125 | 0.24125 | 0.01996 | 7.39E-26 |
| rs4902647 | T | C | -0.103 | 0.46535 | 0.46535 | 0.01872 | 3.81E-08 |
| rs650258 | C | T | 0.1121 | 0.63345 | 0.36655 | 0.01863 | 1.74E-09 |
| rs669607 | C | A | 0.1207 | 0.48195 | 0.48195 | 0.01816 | 2.93E-11 |
| rs7200786 | G | A | -0.1429 | 0.54395 | 0.45605 | 0.01905 | 6.30E-14 |
| rs771767 | G | A | -0.1125 | 0.70795 | 0.29205 | 0.01962 | 1.00E-08 |
| rs874628 | G | A | -0.1138 | 0.2805 | 0.2805 | 0.02078 | 4.32E-08 |
| rs9282641 | A | G | -0.1906 | 0.08525 | 0.08525 | 0.03155 | 1.54E-09 |

a The variants together explain 3.7% of the variation in Multiple Sclerosis (R2 = 0.037; F (TOTAL) = 40.004).

b Increase in odds of Multiple Sclerosis in per effect allele.

c Effect Allele Frequency

d Minor Allele Frequency

| Characteristics of the single nucleotide polymorphisms (SNP) used as instrumental variables for Hypothyroidisma |
| --- |

| SNP | Effect Allele | Other Allele | Effect (BETA) | EAFc | MAFd | Standard Error | P-Value |
| --- | --- | --- | --- | --- | --- | --- | --- |
| rs10760344 | T | G | 0.1034 | 0.3472 | 0.3472 | 0.0143 | 4.96E-13 |
| rs10974437 | G | A | -0.1028 | 0.1696 | 0.1696 | 0.0182 | 1.72E-08 |
| rs10983700 | C | T | 0.2137 | 0.6632 | 0.3368 | 0.0144 | 5.18E-50 |
| rs11171710 | A | G | -0.0764 | 0.4461 | 0.4461 | 0.0138 | 2.97E-08 |
| rs1203943 | C | T | 0.0947 | 0.7936 | 0.2064 | 0.0168 | 1.81E-08 |
| rs12348448 | G | A | -0.0832 | 0.3663 | 0.3663 | 0.0145 | 9.29E-09 |
| rs1317983 | C | T | 0.1137 | 0.6832 | 0.3168 | 0.0147 | 1.12E-14 |
| rs143117642 | A | G | -0.2064 | 0.03962 | 0.03962 | 0.035 | 3.68E-09 |
| rs1534430 | T | C | -0.0842 | 0.4148 | 0.4148 | 0.0137 | 8.64E-10 |
| rs17008423 | T | C | -0.1186 | 0.12 | 0.12 | 0.0212 | 2.33E-08 |
| rs17364832 | G | T | 0.0909 | 0.293 | 0.293 | 0.0149 | 1.06E-09 |
| rs17786733 | A | T | 0.0785 | 0.4295 | 0.4295 | 0.0138 | 1.18E-08 |
| rs1915930 | T | G | 0.0954 | 0.6222 | 0.3778 | 0.014 | 1.03E-11 |
| rs1993945 | T | A | 0.1258 | 0.4154 | 0.4154 | 0.0138 | 5.98E-20 |
| rs2110451 | A | G | 0.0906 | 0.2804 | 0.2804 | 0.0151 | 2.04E-09 |
| rs2111485 | G | A | 0.0799 | 0.5856 | 0.4144 | 0.0138 | 7.35E-09 |
| rs229531 | C | T | 0.0826 | 0.4041 | 0.4041 | 0.0138 | 2.38E-09 |
| rs2553610 | G | C | -0.0778 | 0.4716 | 0.4716 | 0.0136 | 1.03E-08 |
| rs2844542 | G | C | 0.1087 | 0.3427 | 0.3427 | 0.0148 | 2.28E-13 |
| rs3008034 | C | T | -0.0879 | 0.2609 | 0.2609 | 0.0154 | 1.19E-08 |
| rs3087243 | A | G | -0.1302 | 0.3263 | 0.3263 | 0.0145 | 3.11E-19 |
| rs4274624 | T | C | -0.1121 | 0.7648 | 0.2352 | 0.016 | 2.59E-12 |
| rs597808 | G | A | -0.1638 | 0.5816 | 0.4184 | 0.0137 | 8.70E-33 |
| rs6679677 | A | C | 0.3052 | 0.1533 | 0.1533 | 0.0187 | 5.47E-60 |
| rs7599564 | G | A | 0.0792 | 0.625 | 0.375 | 0.0141 | 1.80E-08 |
| rs7754251 | C | G | 0.0819 | 0.4524 | 0.4524 | 0.0136 | 1.82E-09 |
| rs897586 | A | G | -0.0805 | 0.3156 | 0.3156 | 0.0146 | 3.83E-08 |
| rs9271365 | G | T | 0.2357 | 0.3712 | 0.3712 | 0.0149 | 3.40E-56 |
| rs9277457 | G | C | -0.1179 | 0.1935 | 0.1935 | 0.0173 | 9.50E-12 |
| rs9497965 | T | C | 0.0935 | 0.339 | 0.339 | 0.0144 | 8.44E-11 |

a The variants together explain 8.9% of the variation in Hypothyroidism (R2 = 0.089; F (TOTAL) = 255.830).

b Increase in odds of Hypothyroidism in per effect allele.

c Effect Allele Frequency

d Minor Allele Frequency

Characteristics of the single nucleotide polymorphisms (SNP) used as instrumental variables for Type 2 Diabetesa

| SNP | Effect Allele | Other Allele | Effect (BETA)b | EAFc | MAFd | Standard Error | P-Value |
| --- | --- | --- | --- | --- | --- | --- | --- |
| rs1005752 | A | C | 0.079 | 0.72 | 0.28 | 0.007 | 5.70E-29 |
| rs10097617 | T | C | 0.051 | 0.48 | 0.48 | 0.0063 | 1.10E-15 |
| rs10193538 | T | G | 0.037 | 0.61 | 0.39 | 0.0065 | 1.70E-08 |
| rs10195252 | T | C | 0.06 | 0.59 | 0.41 | 0.0064 | 1.60E-20 |
| rs10228066 | T | C | 0.066 | 0.54 | 0.46 | 0.0063 | 1.90E-25 |
| rs10406327 | C | G | 0.035 | 0.52 | 0.48 | 0.0064 | 4.60E-08 |
| rs10406431 | A | G | 0.059 | 0.56 | 0.44 | 0.0065 | 2.50E-19 |
| rs10471048 | C | G | -0.042 | 0.66 | 0.34 | 0.0067 | 5.70E-10 |
| rs1061810 | A | C | 0.05 | 0.29 | 0.29 | 0.007 | 8.50E-13 |
| rs10750397 | A | G | 0.045 | 0.28 | 0.28 | 0.007 | 2.00E-10 |
| rs10771260 | A | C | -0.037 | 0.61 | 0.39 | 0.0065 | 1.70E-08 |
| rs10811660 | A | G | -0.16 | 0.17 | 0.17 | 0.0086 | 6.60E-79 |
| rs10830963 | C | G | -0.099 | 0.72 | 0.28 | 0.0071 | 1.50E-43 |
| rs10842994 | T | C | -0.074 | 0.19 | 0.19 | 0.0081 | 2.50E-20 |
| rs10882101 | T | C | 0.11 | 0.59 | 0.41 | 0.0064 | 1.60E-62 |
| rs10893830 | T | C | -0.054 | 0.13 | 0.13 | 0.0094 | 7.50E-09 |
| rs10908278 | A | T | -0.074 | 0.52 | 0.48 | 0.0064 | 3.10E-30 |
| rs10937721 | C | G | 0.087 | 0.59 | 0.41 | 0.0065 | 1.60E-40 |
| rs10938398 | A | G | 0.044 | 0.43 | 0.43 | 0.0064 | 4.90E-12 |
| rs10954772 | T | C | 0.041 | 0.31 | 0.31 | 0.0068 | 2.30E-09 |
| rs10974438 | A | C | -0.051 | 0.64 | 0.36 | 0.0066 | 1.60E-14 |
| rs11063018 | T | C | -0.053 | 0.82 | 0.18 | 0.0084 | 1.60E-10 |
| rs1117610 | A | T | -0.044 | 0.78 | 0.22 | 0.0076 | 1.10E-08 |
| rs11257655 | T | C | 0.09 | 0.22 | 0.22 | 0.0076 | 3.70E-32 |
| rs1127215 | T | C | -0.047 | 0.42 | 0.42 | 0.0064 | 2.30E-13 |
| rs114222749 | T | C | 0.17 | 0.023 | 0.023 | 0.021 | 9.20E-16 |
| rs11496066 | T | C | 0.047 | 0.82 | 0.18 | 0.0083 | 1.20E-08 |
| rs115505614 | T | C | 0.17 | 0.05 | 0.05 | 0.015 | 1.70E-29 |
| rs11642430 | C | G | -0.042 | 0.6 | 0.4 | 0.0065 | 1.20E-10 |
| rs116425039 | A | G | -0.28 | 0.0099 | 0.0099 | 0.036 | 1.00E-14 |
| rs11680058 | A | G | 0.058 | 0.86 | 0.14 | 0.01 | 1.30E-08 |
| rs11688682 | C | G | -0.058 | 0.27 | 0.27 | 0.0075 | 1.40E-14 |
| rs116989257 | A | G | 0.075 | 0.93 | 0.07 | 0.014 | 3.60E-08 |
| rs11699802 | T | C | -0.043 | 0.46 | 0.46 | 0.0064 | 2.50E-11 |
| rs11708067 | A | G | 0.089 | 0.77 | 0.23 | 0.0076 | 1.30E-31 |
| rs11709077 | A | G | -0.11 | 0.12 | 0.12 | 0.0098 | 1.60E-27 |
| rs11759026 | A | G | -0.067 | 0.77 | 0.23 | 0.0075 | 1.30E-18 |
| rs11842871 | T | G | -0.042 | 0.27 | 0.27 | 0.0073 | 1.50E-08 |
| rs11958808 | C | G | 0.038 | 0.4 | 0.4 | 0.0065 | 5.80E-09 |
| rs12001437 | T | C | -0.041 | 0.63 | 0.37 | 0.0065 | 3.70E-10 |
| rs12140153 | T | G | -0.064 | 0.095 | 0.095 | 0.011 | 1.20E-08 |
| rs12185577 | A | G | 0.051 | 0.6 | 0.4 | 0.0065 | 7.20E-15 |
| rs1260326 | T | C | -0.067 | 0.39 | 0.39 | 0.0065 | 1.30E-24 |
| rs12630224 | T | C | 0.038 | 0.64 | 0.36 | 0.0066 | 1.50E-08 |
| rs12640250 | A | C | -0.039 | 0.29 | 0.29 | 0.0071 | 4.50E-08 |
| rs12719778 | T | C | 0.039 | 0.54 | 0.46 | 0.0064 | 2.10E-09 |
| rs12769661 | A | G | -0.044 | 0.3 | 0.3 | 0.007 | 3.20E-10 |
| rs12798028 | T | C | 0.037 | 0.41 | 0.41 | 0.0064 | 9.20E-09 |
| rs12811407 | A | G | 0.049 | 0.33 | 0.33 | 0.007 | 2.40E-12 |
| rs12920022 | A | T | 0.053 | 0.16 | 0.16 | 0.009 | 2.90E-09 |
| rs1296328 | A | C | 0.035 | 0.45 | 0.45 | 0.0064 | 4.30E-08 |
| rs13041756 | T | C | -0.058 | 0.89 | 0.11 | 0.01 | 1.30E-08 |
| rs13262861 | A | C | -0.094 | 0.17 | 0.17 | 0.0087 | 1.80E-27 |
| rs13426680 | A | G | 0.082 | 0.94 | 0.06 | 0.013 | 6.40E-10 |
| rs1359790 | A | G | -0.083 | 0.28 | 0.28 | 0.0071 | 5.70E-31 |
| rs1377807 | C | G | 0.057 | 0.31 | 0.31 | 0.0068 | 5.70E-17 |
| rs1412234 | T | C | -0.043 | 0.68 | 0.32 | 0.0068 | 2.50E-10 |
| rs141521721 | A | C | 0.12 | 0.024 | 0.024 | 0.021 | 2.80E-08 |
| rs1421085 | T | C | -0.12 | 0.58 | 0.42 | 0.0064 | 2.40E-78 |
| rs1426371 | A | G | -0.05 | 0.26 | 0.26 | 0.0073 | 1.10E-11 |
| rs145678014 | T | G | -0.11 | 0.043 | 0.043 | 0.016 | 1.10E-11 |
| rs145904381 | T | C | 0.17 | 0.99 | 0.01 | 0.031 | 2.20E-08 |
| rs1493694 | T | C | 0.084 | 0.11 | 0.11 | 0.01 | 2.10E-16 |
| rs1517037 | T | C | -0.046 | 0.19 | 0.19 | 0.0082 | 1.80E-08 |
| rs1531583 | T | G | 0.11 | 0.046 | 0.046 | 0.015 | 1.20E-12 |
| rs1561927 | T | C | -0.043 | 0.73 | 0.27 | 0.0071 | 1.90E-09 |
| rs1562396 | A | G | -0.058 | 0.68 | 0.32 | 0.0069 | 7.60E-17 |
| rs1563575 | A | G | 0.048 | 0.73 | 0.27 | 0.0072 | 3.80E-11 |
| rs1573090 | T | G | 0.05 | 0.54 | 0.46 | 0.0064 | 8.40E-15 |
| rs1580278 | A | C | -0.041 | 0.53 | 0.47 | 0.0064 | 2.90E-10 |
| rs1708302 | T | C | -0.092 | 0.49 | 0.49 | 0.0063 | 4.20E-48 |
| rs17122772 | C | G | -0.043 | 0.77 | 0.23 | 0.0077 | 2.00E-08 |
| rs17168486 | T | C | 0.069 | 0.18 | 0.18 | 0.0083 | 6.90E-17 |
| rs17522122 | T | G | 0.038 | 0.47 | 0.47 | 0.0064 | 4.00E-09 |
| rs17689007 | A | G | -0.048 | 0.47 | 0.47 | 0.0064 | 1.70E-13 |
| rs17772814 | A | G | -0.078 | 0.085 | 0.085 | 0.013 | 5.00E-10 |
| rs17791513 | A | G | 0.1 | 0.93 | 0.07 | 0.013 | 2.90E-14 |
| rs1783541 | T | C | 0.061 | 0.2 | 0.2 | 0.008 | 1.40E-14 |
| rs17836088 | C | G | 0.058 | 0.22 | 0.22 | 0.0077 | 9.70E-14 |
| rs1796330 | C | G | -0.049 | 0.43 | 0.43 | 0.0064 | 3.20E-14 |
| rs1800961 | T | C | 0.16 | 0.035 | 0.035 | 0.017 | 3.20E-20 |
| rs1801645 | T | C | -0.048 | 0.72 | 0.28 | 0.0074 | 1.50E-10 |
| rs1999536 | C | G | -0.041 | 0.57 | 0.43 | 0.0064 | 1.30E-10 |
| rs2102278 | A | G | -0.038 | 0.68 | 0.32 | 0.0069 | 4.50E-08 |
| rs2189301 | A | G | -0.06 | 0.13 | 0.13 | 0.0097 | 6.50E-10 |
| rs2197973 | T | C | 0.035 | 0.54 | 0.46 | 0.0063 | 4.40E-08 |
| rs2237895 | A | C | -0.093 | 0.57 | 0.43 | 0.0066 | 3.60E-44 |
| rs2258238 | A | T | -0.11 | 0.9 | 0.1 | 0.011 | 2.00E-25 |
| rs2268078 | A | G | 0.043 | 0.66 | 0.34 | 0.0067 | 2.90E-10 |
| rs2272163 | A | C | -0.037 | 0.38 | 0.38 | 0.0065 | 1.20E-08 |
| rs2277536 | T | C | -0.044 | 0.7 | 0.3 | 0.0069 | 3.10E-10 |
| rs2292662 | T | C | -0.065 | 0.16 | 0.16 | 0.0089 | 3.30E-13 |
| rs2307111 | T | C | 0.053 | 0.61 | 0.39 | 0.0065 | 3.30E-16 |
| rs231360 | T | C | 0.06 | 0.4 | 0.4 | 0.0066 | 2.90E-19 |
| rs2383205 | A | G | -0.054 | 0.4 | 0.4 | 0.0065 | 1.30E-16 |
| rs243024 | A | G | 0.058 | 0.46 | 0.46 | 0.0063 | 4.40E-20 |
| rs2440374 | C | G | -0.041 | 0.75 | 0.25 | 0.0074 | 4.30E-08 |
| rs2494196 | A | C | -0.055 | 0.29 | 0.29 | 0.007 | 6.60E-15 |
| rs263 | T | C | -0.048 | 0.17 | 0.17 | 0.0085 | 1.40E-08 |
| rs2648731 | A | G | 0.046 | 0.22 | 0.22 | 0.0076 | 2.10E-09 |
| rs2767036 | A | C | -0.039 | 0.71 | 0.29 | 0.0069 | 2.50E-08 |
| rs2796441 | A | G | -0.066 | 0.41 | 0.41 | 0.0065 | 8.50E-24 |
| rs2812541 | A | C | -0.044 | 0.54 | 0.46 | 0.0064 | 6.10E-12 |
| rs28505901 | A | G | -0.076 | 0.25 | 0.25 | 0.0081 | 2.60E-21 |
| rs2857605 | T | C | 0.061 | 0.78 | 0.22 | 0.0077 | 4.80E-15 |
| rs2890156 | A | T | 0.065 | 0.14 | 0.14 | 0.0092 | 1.50E-12 |
| rs291369 | T | C | 0.039 | 0.67 | 0.33 | 0.0067 | 6.70E-09 |
| rs2972144 | A | G | -0.094 | 0.36 | 0.36 | 0.0066 | 7.90E-46 |
| rs3020067 | A | G | 0.04 | 0.68 | 0.32 | 0.0068 | 3.90E-09 |
| rs3111316 | A | G | 0.046 | 0.59 | 0.41 | 0.0065 | 1.60E-12 |
| rs329122 | A | G | 0.037 | 0.43 | 0.43 | 0.0064 | 9.20E-09 |
| rs340874 | T | C | -0.068 | 0.44 | 0.44 | 0.0064 | 5.60E-26 |
| rs34584161 | A | G | 0.048 | 0.76 | 0.24 | 0.0075 | 2.90E-10 |
| rs34715063 | T | C | -0.076 | 0.88 | 0.12 | 0.01 | 3.30E-14 |
| rs348330 | A | G | -0.051 | 0.64 | 0.36 | 0.0067 | 3.90E-14 |
| rs34965774 | A | G | 0.054 | 0.14 | 0.14 | 0.0092 | 3.50E-09 |
| rs35011184 | A | G | 0.28 | 0.23 | 0.23 | 0.0075 | 1.00E-200 |
| rs35352848 | T | C | 0.071 | 0.79 | 0.21 | 0.0079 | 9.50E-20 |
| rs35777422 | A | G | -0.039 | 0.35 | 0.35 | 0.0066 | 5.20E-09 |
| rs35895680 | A | C | -0.055 | 0.32 | 0.32 | 0.0069 | 3.80E-15 |
| rs35999103 | T | C | 0.052 | 0.15 | 0.15 | 0.0091 | 8.30E-09 |
| rs3751837 | T | C | 0.044 | 0.22 | 0.22 | 0.0077 | 1.70E-08 |
| rs3768321 | T | G | 0.085 | 0.2 | 0.2 | 0.008 | 1.30E-26 |
| rs3798519 | A | C | -0.058 | 0.82 | 0.18 | 0.0082 | 1.10E-12 |
| rs3802177 | A | G | -0.11 | 0.31 | 0.31 | 0.0069 | 6.30E-55 |
| rs4238013 | T | C | -0.058 | 0.79 | 0.21 | 0.008 | 3.30E-13 |
| rs429358 | T | C | 0.08 | 0.85 | 0.15 | 0.0092 | 1.80E-18 |
| rs4457053 | A | G | -0.059 | 0.7 | 0.3 | 0.0069 | 1.40E-17 |
| rs465002 | T | C | 0.073 | 0.74 | 0.26 | 0.0073 | 3.80E-23 |
| rs4679370 | T | C | -0.039 | 0.46 | 0.46 | 0.0064 | 1.40E-09 |
| rs4686471 | T | C | -0.06 | 0.39 | 0.39 | 0.0065 | 3.10E-20 |
| rs4688760 | T | C | 0.043 | 0.68 | 0.32 | 0.0069 | 4.50E-10 |
| rs4709746 | T | C | -0.056 | 0.13 | 0.13 | 0.0096 | 5.00E-09 |
| rs474513 | A | G | 0.039 | 0.52 | 0.48 | 0.0063 | 1.00E-09 |
| rs4804833 | A | G | 0.047 | 0.39 | 0.39 | 0.0066 | 1.10E-12 |
| rs4865436 | C | G | -0.046 | 0.7 | 0.3 | 0.0075 | 1.00E-09 |
| rs4925109 | A | G | 0.048 | 0.32 | 0.32 | 0.0068 | 3.90E-12 |
| rs4929965 | A | G | 0.07 | 0.38 | 0.38 | 0.0067 | 4.80E-25 |
| rs4932265 | T | C | 0.065 | 0.27 | 0.27 | 0.0071 | 7.20E-20 |
| rs4946812 | A | G | -0.039 | 0.33 | 0.33 | 0.0068 | 1.00E-08 |
| rs4977213 | T | C | -0.051 | 0.63 | 0.37 | 0.0067 | 4.40E-14 |
| rs505922 | T | C | -0.046 | 0.67 | 0.33 | 0.0067 | 5.40E-12 |
| rs5215 | T | C | -0.07 | 0.63 | 0.37 | 0.0065 | 2.00E-26 |
| rs523288 | A | T | -0.056 | 0.76 | 0.24 | 0.0074 | 7.50E-14 |
| rs539515 | A | C | -0.051 | 0.8 | 0.2 | 0.008 | 1.20E-10 |
| rs55653563 | A | C | 0.043 | 0.73 | 0.27 | 0.0072 | 3.20E-09 |
| rs56348580 | C | G | -0.062 | 0.31 | 0.31 | 0.0069 | 3.80E-19 |
| rs5758223 | A | G | 0.038 | 0.72 | 0.28 | 0.007 | 4.60E-08 |
| rs58432198 | T | C | -0.065 | 0.12 | 0.12 | 0.01 | 1.80E-10 |
| rs58682124 | A | G | 0.044 | 0.75 | 0.25 | 0.0075 | 4.80E-09 |
| rs58730668 | T | C | 0.068 | 0.86 | 0.14 | 0.0092 | 1.00E-13 |
| rs601945 | A | G | -0.08 | 0.82 | 0.18 | 0.0085 | 2.70E-21 |
| rs60276348 | T | C | 0.052 | 0.14 | 0.14 | 0.0095 | 2.90E-08 |
| rs6070625 | C | G | -0.044 | 0.48 | 0.48 | 0.0063 | 3.20E-12 |
| rs61676547 | C | G | 0.055 | 0.19 | 0.19 | 0.0081 | 1.00E-11 |
| rs62007683 | T | G | -0.037 | 0.35 | 0.35 | 0.0067 | 3.80E-08 |
| rs62080313 | T | C | -0.056 | 0.88 | 0.12 | 0.0098 | 9.10E-09 |
| rs62107261 | T | C | 0.11 | 0.95 | 0.05 | 0.016 | 1.80E-11 |
| rs62271373 | A | T | 0.088 | 0.055 | 0.055 | 0.014 | 1.00E-09 |
| rs6458354 | T | C | -0.051 | 0.71 | 0.29 | 0.007 | 3.70E-13 |
| rs6459733 | C | G | -0.058 | 0.33 | 0.33 | 0.0068 | 3.90E-17 |
| rs648795 | A | T | 0.042 | 0.42 | 0.42 | 0.0065 | 1.00E-10 |
| rs6518681 | A | G | -0.083 | 0.086 | 0.086 | 0.012 | 9.60E-13 |
| rs6600191 | T | C | 0.061 | 0.82 | 0.18 | 0.0085 | 7.00E-13 |
| rs67232546 | T | C | 0.056 | 0.21 | 0.21 | 0.008 | 1.40E-12 |
| rs6780171 | A | T | 0.11 | 0.31 | 0.31 | 0.0068 | 2.50E-58 |
| rs6821438 | A | G | 0.042 | 0.53 | 0.47 | 0.0063 | 5.40E-11 |
| rs6885132 | C | G | 0.078 | 0.9 | 0.1 | 0.011 | 9.50E-13 |
| rs6976111 | A | C | 0.042 | 0.31 | 0.31 | 0.0073 | 1.50E-08 |
| rs7022807 | A | G | -0.04 | 0.6 | 0.4 | 0.0064 | 3.60E-10 |
| rs702634 | A | G | 0.051 | 0.69 | 0.31 | 0.0069 | 2.10E-13 |
| rs703972 | C | G | -0.071 | 0.47 | 0.47 | 0.0064 | 2.50E-28 |
| rs7178762 | T | C | -0.039 | 0.54 | 0.46 | 0.0063 | 7.00E-10 |
| rs7196842 | T | C | -0.038 | 0.43 | 0.43 | 0.0064 | 5.30E-09 |
| rs7222481 | C | G | 0.039 | 0.32 | 0.32 | 0.0068 | 1.70E-08 |
| rs7240767 | T | C | -0.037 | 0.62 | 0.38 | 0.0065 | 2.00E-08 |
| rs72764958 | T | C | 0.043 | 0.63 | 0.37 | 0.0066 | 9.60E-11 |
| rs72802342 | A | C | -0.13 | 0.077 | 0.077 | 0.012 | 1.30E-27 |
| rs7299943 | A | T | -0.048 | 0.21 | 0.21 | 0.008 | 1.80E-09 |
| rs7538328 | T | C | -0.042 | 0.76 | 0.24 | 0.0073 | 1.30E-08 |
| rs75524028 | T | C | 0.091 | 0.048 | 0.048 | 0.015 | 1.60E-09 |
| rs7608050 | A | G | -0.054 | 0.17 | 0.17 | 0.0085 | 1.80E-10 |
| rs76223293 | C | G | 0.045 | 0.19 | 0.19 | 0.0082 | 3.90E-08 |
| rs7629630 | A | T | 0.051 | 0.86 | 0.14 | 0.0091 | 2.20E-08 |
| rs7669833 | A | T | -0.054 | 0.3 | 0.3 | 0.007 | 1.80E-14 |
| rs76895963 | T | G | 0.48 | 0.98 | 0.02 | 0.027 | 5.30E-70 |
| rs77464186 | A | C | 0.11 | 0.84 | 0.16 | 0.0088 | 2.30E-33 |
| rs7756992 | A | G | -0.14 | 0.73 | 0.27 | 0.007 | 3.00E-87 |
| rs77864822 | A | G | 0.073 | 0.93 | 0.07 | 0.013 | 2.20E-08 |
| rs7959830 | T | G | 0.037 | 0.4 | 0.4 | 0.0065 | 2.00E-08 |
| rs7987740 | T | C | 0.036 | 0.61 | 0.39 | 0.0065 | 4.10E-08 |
| rs8010382 | A | G | -0.038 | 0.58 | 0.42 | 0.0066 | 8.10E-09 |
| rs80147536 | A | T | 0.13 | 0.9 | 0.1 | 0.011 | 2.70E-30 |
| rs8018574 | A | T | -0.041 | 0.26 | 0.26 | 0.0073 | 2.80E-08 |
| rs8037894 | C | G | -0.047 | 0.43 | 0.43 | 0.0064 | 3.70E-13 |
| rs8107974 | A | T | -0.093 | 0.92 | 0.08 | 0.012 | 6.30E-15 |
| rs878521 | A | G | 0.057 | 0.25 | 0.25 | 0.0074 | 1.60E-14 |
| rs9304665 | A | T | 0.045 | 0.76 | 0.24 | 0.0076 | 4.00E-09 |
| rs9379084 | A | G | -0.097 | 0.11 | 0.11 | 0.011 | 2.30E-20 |
| rs9563615 | A | T | 0.042 | 0.71 | 0.29 | 0.007 | 3.90E-09 |
| rs9814673 | T | C | 0.041 | 0.28 | 0.28 | 0.007 | 5.90E-09 |
| rs9860730 | A | G | 0.055 | 0.7 | 0.3 | 0.007 | 7.40E-15 |
| rs9873618 | A | G | -0.066 | 0.29 | 0.29 | 0.007 | 8.50E-21 |

a The variants together explain 8.4% of the variation in Type 2Diabetes (R2 = 0.084; F (TOTAL) = 371.556).

b Increase in odds of Type 2 Diabetes in per effect allele.

c Effect Allele Frequency

d Minor Allele Frequency

| Characteristics of the single nucleotide polymorphisms (SNP) used as instrumental variables for Sex Hormone-Binding Globulin (SHBG) Levelsa |
| --- |

| SNP | Effect Allele | Other Allele | Effect (BETA)b | EAFc | MAFd | Standard Error | P-Value |
| --- | --- | --- | --- | --- | --- | --- | --- |
| rs10141867 | A | G | 0.016761 | 0.284114 | 0.284114 | 0.00224676 | 3.90E-16 |
| rs10210970 | T | C | -0.0217591 | 0.130881 | 0.130881 | 0.00295905 | 1.80E-14 |
| rs1042852 | T | C | -0.0190768 | 0.274119 | 0.274119 | 0.00225239 | 2.40E-19 |
| rs1047743 | G | C | 0.0262627 | 0.319463 | 0.319463 | 0.00208159 | 4.00E-36 |
| rs1047891 | A | C | 0.0220665 | 0.313218 | 0.313218 | 0.00219589 | 5.10E-25 |
| rs1047912 | T | C | 0.0229516 | 0.300929 | 0.300929 | 0.00218222 | 1.20E-26 |
| rs10513272 | T | C | -0.0184094 | 0.230711 | 0.230711 | 0.00238344 | 9.80E-18 |
| rs10737153 | C | A | -0.032626 | 0.570593 | 0.429407 | 0.0020279 | 9.60E-65 |
| rs10752297 | C | T | 0.0176861 | 0.585635 | 0.414365 | 0.00204471 | 8.00E-21 |
| rs10753556 | G | A | 0.0219941 | 0.875266 | 0.124734 | 0.00301694 | 5.40E-16 |
| rs1075403 | G | T | 0.0168553 | 0.63224 | 0.36776 | 0.00208512 | 1.60E-17 |
| rs10760112 | T | C | -0.0182743 | 0.695111 | 0.304889 | 0.00218422 | 1.80E-20 |
| rs10849933 | C | A | 0.018131 | 0.157135 | 0.157135 | 0.0027469 | 3.20E-12 |
| rs10898075 | T | C | -0.0171546 | 0.169193 | 0.169193 | 0.0026827 | 2.30E-09 |
| rs11010551 | C | T | -0.0123375 | 0.377614 | 0.377614 | 0.00206095 | 2.90E-08 |
| rs11021219 | A | G | 0.0181988 | 0.142461 | 0.142461 | 0.00287479 | 2.90E-10 |
| rs11038642 | T | C | 0.0207903 | 0.140854 | 0.140854 | 0.00288836 | 2.00E-11 |
| rs11042751 | C | T | -0.0218119 | 0.24291 | 0.24291 | 0.00234698 | 2.10E-23 |
| rs1106317 | G | A | -0.0160852 | 0.210508 | 0.210508 | 0.00246463 | 2.80E-09 |
| rs11075253 | A | C | 0.0239889 | 0.297207 | 0.297207 | 0.0022068 | 4.20E-30 |
| rs11089620 | G | C | 0.0229192 | 0.184344 | 0.184344 | 0.00263806 | 3.10E-19 |
| rs11110390 | T | C | -0.0219349 | 0.333407 | 0.333407 | 0.00212453 | 3.00E-26 |
| rs11111274 | A | G | -0.0252202 | 0.737065 | 0.262935 | 0.00226355 | 3.90E-30 |
| rs11121691 | T | C | 0.0228526 | 0.233741 | 0.233741 | 0.00238029 | 7.30E-24 |
| rs111912536 | T | C | 0.0270849 | 0.0974023 | 0.0974023 | 0.00337573 | 8.90E-17 |
| rs11191580 | C | T | 0.0268242 | 0.0770224 | 0.0770224 | 0.00374811 | 1.60E-12 |
| rs112035922 | T | C | -0.0203792 | 0.234048 | 0.234048 | 0.0023916 | 1.80E-18 |
| rs1120608 | C | T | 0.0246132 | 0.0613891 | 0.0613891 | 0.00414719 | 5.80E-10 |
| rs112134815 | A | C | -0.0226216 | 0.0812882 | 0.0812882 | 0.00368141 | 3.10E-08 |
| rs1126670 | A | C | -0.0331858 | 0.696234 | 0.303766 | 0.00218859 | 4.00E-58 |
| rs1128249 | T | G | 0.039171 | 0.392189 | 0.392189 | 0.00204115 | 9.40E-93 |
| rs1128919 | A | G | 0.0137703 | 0.301555 | 0.301555 | 0.00217712 | 1.90E-11 |
| rs1132368 | A | G | -0.0282631 | 0.041215 | 0.041215 | 0.00515841 | 1.20E-08 |
| rs1135989 | A | G | -0.0194175 | 0.388802 | 0.388802 | 0.00197704 | 2.20E-25 |
| rs114165349 | C | G | -0.203771 | 0.0236024 | 0.0236024 | 0.00659885 | 1.00E-200 |
| rs115447786 | T | C | -0.0430159 | 0.0446399 | 0.0446399 | 0.0048712 | 7.00E-19 |
| rs11550348 | A | G | 0.0632857 | 0.123506 | 0.123506 | 0.00306245 | 1.40E-102 |
| rs11556184 | T | C | -0.0482257 | 0.0654432 | 0.0654432 | 0.00405756 | 1.40E-33 |
| rs11556924 | T | C | 0.017144 | 0.38763 | 0.38763 | 0.00208606 | 1.30E-17 |
| rs11581220 | T | G | 0.0251411 | 0.119299 | 0.119299 | 0.00309001 | 5.60E-19 |
| rs11600570 | A | G | -0.016901 | 0.121403 | 0.121403 | 0.00309223 | 5.40E-09 |
| rs11635545 | T | G | -0.0207172 | 0.20408 | 0.20408 | 0.00249259 | 2.10E-19 |
| rs11636917 | C | T | -0.034928 | 0.343802 | 0.343802 | 0.0021139 | 7.30E-70 |
| rs11639856 | A | T | -0.013474 | 0.195203 | 0.195203 | 0.00254817 | 1.10E-08 |
| rs11647008 | C | T | -0.025954 | 0.495362 | 0.495362 | 0.002018 | 3.20E-41 |
| rs11655704 | C | T | 0.0782784 | 0.314284 | 0.314284 | 0.00207191 | 1.00E-200 |
| rs11657929 | G | T | -0.0202742 | 0.477196 | 0.477196 | 0.00193696 | 9.40E-28 |
| rs11664106 | T | A | 0.0176965 | 0.369803 | 0.369803 | 0.00212962 | 2.00E-16 |
| rs11737560 | T | C | -0.0254556 | 0.124231 | 0.124231 | 0.00303264 | 5.80E-19 |
| rs117411982 | A | C | 0.0570171 | 0.0156041 | 0.0156041 | 0.00812849 | 8.90E-14 |
| rs117572361 | G | A | 0.0362894 | 0.0257836 | 0.0257836 | 0.00631868 | 1.40E-08 |
| rs11806197 | G | A | 0.0190526 | 0.190814 | 0.190814 | 0.00253431 | 2.20E-12 |
| rs11812460 | A | G | 0.0240074 | 0.255616 | 0.255616 | 0.00228975 | 4.80E-26 |
| rs11853116 | T | C | -0.0149796 | 0.672449 | 0.327551 | 0.00214706 | 6.80E-15 |
| rs11883596 | C | T | 0.0213762 | 0.101495 | 0.101495 | 0.00330019 | 1.20E-10 |
| rs11887329 | G | A | -0.025052 | 0.233841 | 0.233841 | 0.00235515 | 1.50E-28 |
| rs11917105 | G | T | -0.0143788 | 0.261081 | 0.261081 | 0.0022824 | 1.80E-10 |
| rs11979093 | A | G | -0.0195978 | 0.158865 | 0.158865 | 0.00274327 | 5.10E-14 |
| rs1211184 | C | T | -0.0261095 | 0.093184 | 0.093184 | 0.00342644 | 1.30E-15 |
| rs1223801 | A | G | -0.0382092 | 0.83754 | 0.16246 | 0.00270101 | 4.80E-50 |
| rs1229502 | A | G | -0.0124625 | 0.303377 | 0.303377 | 0.00220108 | 1.90E-08 |
| rs12300756 | T | C | -0.0165978 | 0.229461 | 0.229461 | 0.00237925 | 4.80E-13 |
| rs12414178 | T | C | -0.0297615 | 0.233224 | 0.233224 | 0.00235674 | 4.20E-38 |
| rs12454712 | C | T | 0.0235395 | 0.375078 | 0.375078 | 0.00209522 | 1.60E-31 |
| rs12569576 | G | A | -0.0162183 | 0.454712 | 0.454712 | 0.00200739 | 5.90E-17 |
| rs1260326 | C | T | 0.093048 | 0.598397 | 0.401603 | 0.00206023 | 1.00E-200 |
| rs1262217 | A | G | 0.0176115 | 0.825533 | 0.174467 | 0.00263197 | 2.70E-12 |
| rs12888084 | G | A | 0.0130136 | 0.544866 | 0.455134 | 0.00202027 | 5.50E-13 |
| rs12897338 | T | C | -0.0240161 | 0.4952 | 0.4952 | 0.00201414 | 6.00E-36 |
| rs12915708 | C | G | 0.0172427 | 0.304042 | 0.304042 | 0.0021821 | 1.30E-15 |
| rs1293940 | C | T | 0.0123282 | 0.513122 | 0.486878 | 0.00201229 | 4.60E-11 |
| rs12945299 | G | A | 0.0537969 | 0.196426 | 0.196426 | 0.00245018 | 3.10E-113 |
| rs12967290 | T | C | -0.0137722 | 0.29847 | 0.29847 | 0.00220487 | 7.90E-10 |
| rs12983990 | G | A | 0.0159043 | 0.162928 | 0.162928 | 0.00273091 | 9.10E-10 |
| rs13011791 | A | T | 0.0142413 | 0.199536 | 0.199536 | 0.00251494 | 1.10E-09 |
| rs13094241 | G | T | 0.0116941 | 0.728467 | 0.271533 | 0.00225279 | 2.40E-08 |
| rs13155267 | C | T | 0.0141252 | 0.277645 | 0.277645 | 0.00224292 | 5.90E-10 |
| rs1326122 | A | C | 0.0610776 | 0.0210748 | 0.0210748 | 0.0070269 | 5.00E-22 |
| rs1326775 | T | C | -0.0173656 | 0.166321 | 0.166321 | 0.00269701 | 3.00E-12 |
| rs13289095 | T | G | -0.039195 | 0.144322 | 0.144322 | 0.00287357 | 2.20E-47 |
| rs138373837 | T | C | 0.0392943 | 0.0235319 | 0.0235319 | 0.00672672 | 2.00E-10 |
| rs138840 | T | C | -0.021466 | 0.106467 | 0.106467 | 0.00327484 | 3.50E-12 |
| rs138924453 | T | C | 0.0749929 | 0.00574602 | 0.00574602 | 0.0137966 | 1.70E-09 |
| rs1421085 | C | T | 0.0117148 | 0.403026 | 0.403026 | 0.00205432 | 4.10E-08 |
| rs144725072 | A | G | -0.043009 | 0.0316689 | 0.0316689 | 0.00593224 | 2.30E-15 |
| rs144867634 | C | T | -0.0379318 | 0.0252576 | 0.0252576 | 0.00658994 | 1.40E-08 |
| rs1474419 | C | T | 0.0166644 | 0.574376 | 0.425624 | 0.00204805 | 6.00E-15 |
| rs1497406 | G | A | 0.0265373 | 0.579115 | 0.420885 | 0.00201543 | 3.40E-43 |
| rs152503 | A | C | -0.014843 | 0.202417 | 0.202417 | 0.00249813 | 8.30E-10 |
| rs1529868 | T | C | 0.0140188 | 0.599715 | 0.400285 | 0.0020619 | 1.60E-14 |
| rs1531343 | C | G | -0.0207639 | 0.101213 | 0.101213 | 0.00331913 | 9.90E-10 |
| rs1534696 | A | C | 0.0125088 | 0.541266 | 0.458734 | 0.00201372 | 4.20E-11 |
| rs1547014 | C | T | -0.0305309 | 0.674876 | 0.325124 | 0.00215895 | 1.60E-48 |
| rs1556562 | T | G | 0.0219499 | 0.790446 | 0.209554 | 0.00241751 | 1.60E-20 |
| rs1572053 | G | A | 0.0141236 | 0.620738 | 0.379262 | 0.00207742 | 2.70E-13 |
| rs1573486 | A | G | -0.0203082 | 0.320021 | 0.320021 | 0.00216664 | 1.40E-20 |
| rs1574525 | G | A | 0.0299925 | 0.276982 | 0.276982 | 0.00215368 | 5.20E-46 |
| rs157934 | C | T | 0.027442 | 0.304572 | 0.304572 | 0.00218342 | 1.40E-39 |
| rs161941 | T | C | -0.0119501 | 0.28924 | 0.28924 | 0.00222569 | 2.20E-08 |
| rs1661714 | T | C | -0.0156502 | 0.264324 | 0.264324 | 0.0022018 | 4.20E-13 |
| rs16845803 | G | A | -0.0290544 | 0.131146 | 0.131146 | 0.00297538 | 2.30E-26 |
| rs16925010 | T | C | -0.0138089 | 0.274316 | 0.274316 | 0.00225324 | 1.90E-09 |
| rs17036326 | G | A | 0.0487484 | 0.120476 | 0.120476 | 0.00307476 | 3.70E-59 |
| rs17123214 | T | C | -0.0386069 | 0.0185763 | 0.0185763 | 0.00751972 | 3.70E-08 |
| rs17206359 | G | A | 0.0197834 | 0.321353 | 0.321353 | 0.0021425 | 5.10E-21 |
| rs17265852 | C | T | -0.0316302 | 0.0849927 | 0.0849927 | 0.00357116 | 1.30E-18 |
| rs1736176 | A | G | 0.0482439 | 0.283823 | 0.283823 | 0.00224745 | 6.90E-111 |
| rs17377148 | G | T | 0.0474977 | 0.0734607 | 0.0734607 | 0.00381931 | 5.90E-39 |
| rs1741344 | T | C | 0.0117683 | 0.634323 | 0.365677 | 0.00209206 | 7.10E-10 |
| rs1755618 | T | G | -0.0292948 | 0.139705 | 0.139705 | 0.00289779 | 1.40E-26 |
| rs17580 | A | T | 0.0623089 | 0.0482363 | 0.0482363 | 0.00479246 | 1.50E-43 |
| rs17630640 | G | A | 0.0238144 | 0.131275 | 0.131275 | 0.00297687 | 2.20E-18 |
| rs1772183 | A | G | -0.029011 | 0.47908 | 0.47908 | 0.00199798 | 2.40E-53 |
| rs17789218 | C | T | 0.0165555 | 0.244743 | 0.244743 | 0.0023425 | 1.20E-14 |
| rs17790938 | A | G | 0.042401 | 0.0722295 | 0.0722295 | 0.00391065 | 4.50E-28 |
| rs17855876 | A | G | -0.0266222 | 0.103434 | 0.103434 | 0.00330949 | 1.90E-16 |
| rs1801689 | C | A | -0.0924133 | 0.0304482 | 0.0304482 | 0.00564719 | 5.30E-64 |
| rs1832007 | G | A | -0.0509179 | 0.153849 | 0.153849 | 0.00277142 | 1.60E-86 |
| rs1894644 | C | T | -0.0191015 | 0.857258 | 0.142742 | 0.00288898 | 1.00E-12 |
| rs1902023 | C | A | 0.0341097 | 0.473686 | 0.473686 | 0.0020239 | 5.70E-69 |
| rs1920149 | A | G | -0.0169788 | 0.468506 | 0.468506 | 0.00201546 | 1.50E-16 |
| rs1931788 | A | G | -0.0134537 | 0.727993 | 0.272007 | 0.00226182 | 3.60E-10 |
| rs1975937 | T | A | -0.0170651 | 0.171844 | 0.171844 | 0.002664 | 8.00E-11 |
| rs1982151 | G | A | -0.0560448 | 0.740356 | 0.259644 | 0.00231676 | 2.40E-134 |
| rs2021965 | A | C | -0.0126946 | 0.718314 | 0.281686 | 0.00223533 | 1.70E-11 |
| rs2054989 | G | A | 0.0139811 | 0.754096 | 0.245904 | 0.00233005 | 3.40E-11 |
| rs2074518 | T | C | -0.0113521 | 0.454957 | 0.454957 | 0.0019353 | 2.60E-08 |
| rs2075025 | C | T | 0.0191728 | 0.363123 | 0.363123 | 0.00210162 | 4.70E-20 |
| rs2076847 | G | A | 0.0115573 | 0.545996 | 0.454004 | 0.00193469 | 8.70E-09 |
| rs2081687 | C | T | 0.0238137 | 0.662995 | 0.337005 | 0.00212643 | 2.30E-30 |
| rs2205262 | A | C | -0.0175324 | 0.575541 | 0.424459 | 0.00203217 | 1.70E-20 |
| rs2227947 | A | G | 0.0114019 | 0.627065 | 0.372935 | 0.00208682 | 2.30E-09 |
| rs2229357 | A | G | 0.0426912 | 0.240158 | 0.240158 | 0.00235392 | 8.30E-79 |
| rs2230316 | A | G | 0.0338916 | 0.60727 | 0.39273 | 0.00201031 | 3.50E-66 |
| rs2232015 | T | A | 0.0615313 | 0.34206 | 0.34206 | 0.00211316 | 1.00E-200 |
| rs2274159 | G | A | 0.0168735 | 0.491962 | 0.491962 | 0.00201958 | 1.80E-18 |
| rs2275516 | T | G | -0.0195958 | 0.163924 | 0.163924 | 0.00277986 | 7.50E-13 |
| rs2276161 | T | A | -0.0161495 | 0.133676 | 0.133676 | 0.00296172 | 7.40E-09 |
| rs2280552 | T | C | 0.0172476 | 0.370174 | 0.370174 | 0.00208379 | 4.30E-19 |
| rs2282377 | G | C | -0.0167537 | 0.133557 | 0.133557 | 0.0029793 | 2.30E-09 |
| rs2283371 | G | A | 0.0205635 | 0.332804 | 0.332804 | 0.00213439 | 7.90E-25 |
| rs2286973 | A | G | -0.0124092 | 0.411959 | 0.411959 | 0.00205266 | 2.10E-11 |
| rs2288004 | C | G | -0.0199226 | 0.381222 | 0.381222 | 0.00207283 | 3.90E-23 |
| rs2289850 | C | T | 0.0255774 | 0.0530581 | 0.0530581 | 0.00449043 | 1.10E-09 |
| rs2290545 | A | G | -0.0135753 | 0.732128 | 0.267872 | 0.00227879 | 8.70E-11 |
| rs2291542 | T | C | -0.02274 | 0.320717 | 0.320717 | 0.00215885 | 8.90E-25 |
| rs2293476 | C | G | -0.0297214 | 0.227553 | 0.227553 | 0.00238067 | 4.00E-38 |
| rs2293579 | A | G | -0.0143329 | 0.387821 | 0.387821 | 0.00209128 | 1.40E-12 |
| rs2294613 | T | C | 0.0208506 | 0.103938 | 0.103938 | 0.00330856 | 2.10E-12 |
| rs2298650 | T | G | 0.0161035 | 0.269262 | 0.269262 | 0.00228536 | 1.70E-14 |
| rs2302370 | C | T | -0.0154123 | 0.399397 | 0.399397 | 0.00205818 | 3.30E-12 |
| rs2305833 | C | G | -0.0194934 | 0.562726 | 0.437274 | 0.00204176 | 4.30E-23 |
| rs2306374 | C | T | -0.0191268 | 0.160635 | 0.160635 | 0.00273298 | 2.00E-11 |
| rs2306700 | T | C | 0.0176883 | 0.134548 | 0.134548 | 0.00294848 | 1.10E-10 |
| rs2383208 | G | A | 0.0151754 | 0.178073 | 0.178073 | 0.00262746 | 3.60E-08 |
| rs2522056 | A | G | 0.0232787 | 0.187343 | 0.187343 | 0.00257522 | 6.20E-19 |
| rs2529123 | G | A | 0.0171725 | 0.619725 | 0.380275 | 0.00206382 | 7.00E-17 |
| rs2538 | T | C | -0.0122141 | 0.286078 | 0.286078 | 0.00221981 | 1.10E-08 |
| rs2567426 | G | A | -0.019739 | 0.642205 | 0.357795 | 0.00209385 | 2.10E-23 |
| rs2618566 | T | G | -0.0189622 | 0.660375 | 0.339625 | 0.00212868 | 2.70E-20 |
| rs267733 | G | A | -0.0300164 | 0.1597 | 0.1597 | 0.0027355 | 1.30E-30 |
| rs2738755 | T | C | -0.0296824 | 0.329882 | 0.329882 | 0.00212657 | 1.30E-46 |
| rs2820436 | C | A | -0.0252458 | 0.658318 | 0.341682 | 0.00210129 | 5.80E-34 |
| rs2823662 | G | A | 0.0103478 | 0.56809 | 0.43191 | 0.00204475 | 2.30E-08 |
| rs2836934 | C | A | -0.0114984 | 0.429851 | 0.429851 | 0.00205957 | 1.20E-08 |
| rs2862954 | C | T | 0.0250193 | 0.49554 | 0.49554 | 0.00200372 | 3.00E-34 |
| rs28656215 | C | T | -0.0246866 | 0.0730485 | 0.0730485 | 0.00385523 | 1.30E-09 |
| rs2889537 | A | G | 0.0131045 | 0.675147 | 0.324853 | 0.00212271 | 5.40E-11 |
| rs28925904 | T | C | -0.0541666 | 0.0246954 | 0.0246954 | 0.00652533 | 5.10E-17 |
| rs28929474 | T | C | 0.237363 | 0.0197216 | 0.0197216 | 0.0072706 | 1.00E-200 |
| rs2893236 | T | C | 0.0142249 | 0.779029 | 0.220971 | 0.00241628 | 4.60E-11 |
| rs2925979 | C | T | 0.0161725 | 0.699855 | 0.300145 | 0.00219806 | 4.50E-15 |
| rs2943641 | C | T | -0.0339261 | 0.648079 | 0.351921 | 0.00208577 | 4.50E-65 |
| rs2971677 | A | C | -0.0226496 | 0.154246 | 0.154246 | 0.00277427 | 3.30E-16 |
| rs310786 | T | C | 0.0174514 | 0.860917 | 0.139083 | 0.00287758 | 1.90E-10 |
| rs3110039 | G | T | -0.0109842 | 0.606093 | 0.393907 | 0.00205756 | 4.90E-08 |
| rs314373 | A | G | 0.0401169 | 0.186883 | 0.186883 | 0.00257537 | 7.50E-61 |
| rs329120 | T | C | -0.0220426 | 0.418265 | 0.418265 | 0.00204194 | 4.90E-28 |
| rs340874 | C | T | -0.015938 | 0.568931 | 0.431069 | 0.00201247 | 1.90E-17 |
| rs34145453 | G | A | 0.0207587 | 0.367506 | 0.367506 | 0.00208394 | 1.10E-25 |
| rs34372369 | A | G | 0.0414611 | 0.0501079 | 0.0501079 | 0.0046998 | 3.30E-18 |
| rs34481144 | T | C | 0.0132406 | 0.491777 | 0.491777 | 0.00204576 | 3.20E-11 |
| rs34651 | T | C | 0.0294153 | 0.915558 | 0.084442 | 0.00368137 | 6.20E-19 |
| rs34691116 | T | C | 0.0240702 | 0.14719 | 0.14719 | 0.00282018 | 9.60E-20 |
| rs34930209 | G | A | 0.0322481 | 0.099051 | 0.099051 | 0.00337937 | 1.70E-22 |
| rs35171419 | T | C | 0.0285717 | 0.0400748 | 0.0400748 | 0.0051442 | 7.80E-09 |
| rs35313240 | T | C | 0.0640052 | 0.00831559 | 0.00831559 | 0.0113094 | 2.80E-09 |
| rs35350976 | G | A | 0.019582 | 0.177964 | 0.177964 | 0.00266383 | 1.00E-15 |
| rs35497030 | G | A | -0.0191423 | 0.435803 | 0.435803 | 0.00202178 | 9.70E-24 |
| rs35756394 | G | A | -0.0325415 | 0.0793286 | 0.0793286 | 0.00372071 | 2.50E-19 |
| rs35759537 | T | C | 0.0285333 | 0.194768 | 0.194768 | 0.00253836 | 1.40E-32 |
| rs35932591 | T | C | -0.0171697 | 0.121436 | 0.121436 | 0.00305472 | 1.50E-09 |
| rs35955110 | C | T | 0.011383 | 0.311029 | 0.311029 | 0.0021568 | 6.70E-10 |
| rs35981831 | G | T | -0.0429854 | 0.024387 | 0.024387 | 0.00625804 | 2.60E-12 |
| rs3729931 | A | G | 0.0208046 | 0.357896 | 0.357896 | 0.00209369 | 2.60E-24 |
| rs3733322 | G | T | 0.0170019 | 0.625129 | 0.374871 | 0.00208141 | 1.50E-14 |
| rs3741367 | C | T | 0.0138401 | 0.457022 | 0.457022 | 0.00203244 | 4.20E-12 |
| rs3741378 | T | C | 0.0315481 | 0.136821 | 0.136821 | 0.00292661 | 4.20E-32 |
| rs3743588 | A | G | -0.0200523 | 0.281458 | 0.281458 | 0.00225557 | 2.00E-21 |
| rs3746575 | G | C | 0.0426511 | 0.593288 | 0.406712 | 0.00208996 | 2.20E-97 |
| rs3752293 | T | C | 0.0172424 | 0.306117 | 0.306117 | 0.00219928 | 2.00E-16 |
| rs3754186 | A | T | -0.0139399 | 0.500439 | 0.499561 | 0.00200815 | 4.40E-14 |
| rs3760620 | C | T | -0.0195657 | 0.214507 | 0.214507 | 0.00245997 | 8.00E-16 |
| rs3761706 | A | G | -0.044684 | 0.0628882 | 0.0628882 | 0.00411507 | 2.70E-28 |
| rs3779195 | A | T | -0.0820929 | 0.184387 | 0.184387 | 0.00258425 | 1.00E-200 |
| rs3790414 | A | T | -0.0243155 | 0.229505 | 0.229505 | 0.00236881 | 5.00E-24 |
| rs3824627 | C | T | -0.014287 | 0.607329 | 0.392671 | 0.00207173 | 8.30E-12 |
| rs38324 | T | C | -0.0176008 | 0.177847 | 0.177847 | 0.00261903 | 4.70E-10 |
| rs3848375 | T | C | 0.0204783 | 0.806089 | 0.193911 | 0.00254585 | 3.60E-17 |
| rs3858420 | C | G | -0.0217872 | 0.323404 | 0.323404 | 0.0021784 | 9.10E-27 |
| rs3912391 | A | G | -0.0130203 | 0.507301 | 0.492699 | 0.00200341 | 1.10E-13 |
| rs3934712 | C | T | -0.0227515 | 0.212701 | 0.212701 | 0.00245386 | 1.00E-20 |
| rs4026608 | T | C | 0.0136349 | 0.612392 | 0.387608 | 0.00205191 | 1.30E-12 |
| rs41272717 | A | G | 0.015942 | 0.133152 | 0.133152 | 0.00296444 | 3.50E-08 |
| rs41305481 | G | A | 0.011961 | 0.298581 | 0.298581 | 0.00221838 | 4.40E-08 |
| rs4132228 | T | C | 0.0128968 | 0.289066 | 0.289066 | 0.00221411 | 1.60E-08 |
| rs4148646 | G | C | 0.0127167 | 0.637576 | 0.362424 | 0.00211165 | 4.10E-10 |
| rs4149056 | C | T | -0.0776477 | 0.149212 | 0.149212 | 0.0028298 | 1.60E-174 |
| rs41736 | T | C | -0.0153829 | 0.448756 | 0.448756 | 0.00202257 | 1.90E-15 |
| rs4246215 | T | G | -0.0229858 | 0.359543 | 0.359543 | 0.00209443 | 3.70E-29 |
| rs4259246 | T | C | 0.0288573 | 0.326665 | 0.326665 | 0.00214669 | 3.70E-44 |
| rs4291201 | G | A | 0.0191056 | 0.289711 | 0.289711 | 0.00220768 | 2.80E-21 |
| rs4388292 | G | T | 0.018337 | 0.850498 | 0.149502 | 0.00281807 | 1.80E-09 |
| rs440837 | G | A | 0.0457672 | 0.205454 | 0.205454 | 0.00249001 | 2.10E-79 |
| rs445 | T | C | -0.0284671 | 0.0962805 | 0.0962805 | 0.00340323 | 1.90E-17 |
| rs4568225 | T | C | 0.0171155 | 0.312971 | 0.312971 | 0.00215964 | 5.70E-16 |
| rs459193 | G | A | -0.0362628 | 0.747143 | 0.252857 | 0.00230682 | 5.30E-59 |
| rs4633399 | C | A | 0.0183833 | 0.907902 | 0.092098 | 0.00346168 | 3.10E-08 |
| rs4711750 | A | T | -0.0220559 | 0.500164 | 0.499836 | 0.0020117 | 4.50E-30 |
| rs4765127 | T | G | 0.0231284 | 0.334361 | 0.334361 | 0.00211913 | 1.60E-30 |
| rs4804416 | G | T | -0.0367496 | 0.427772 | 0.427772 | 0.00202964 | 1.20E-79 |
| rs4804833 | G | A | 0.0143069 | 0.595836 | 0.404164 | 0.00210978 | 3.30E-12 |
| rs4806073 | C | T | 0.0742675 | 0.932942 | 0.067058 | 0.00400946 | 5.20E-84 |
| rs4809221 | A | G | -0.0148579 | 0.670408 | 0.329592 | 0.00216838 | 7.00E-14 |
| rs4841132 | G | A | 0.06237 | 0.908774 | 0.091226 | 0.00371042 | 1.80E-72 |
| rs4849903 | T | C | -0.015234 | 0.63321 | 0.36679 | 0.0020691 | 7.70E-15 |
| rs4858608 | G | T | -0.0196274 | 0.462853 | 0.462853 | 0.0020112 | 1.50E-24 |
| rs4907236 | T | C | 0.0138626 | 0.282096 | 0.282096 | 0.0022177 | 2.00E-11 |
| rs4925809 | T | C | 0.0246432 | 0.467599 | 0.467599 | 0.00201251 | 1.10E-39 |
| rs4950979 | A | G | -0.0188233 | 0.860855 | 0.139145 | 0.00291714 | 2.00E-11 |
| rs543874 | G | A | 0.0240665 | 0.205602 | 0.205602 | 0.00246852 | 7.30E-23 |
| rs555754 | A | G | 0.0421637 | 0.468001 | 0.468001 | 0.00202293 | 1.70E-109 |
| rs55662831 | A | G | 0.0971291 | 0.371056 | 0.371056 | 0.00200002 | 1.00E-200 |
| rs55707100 | T | C | -0.152947 | 0.0256461 | 0.0256461 | 0.00637931 | 1.00E-143 |
| rs55744465 | T | G | -0.0124679 | 0.314492 | 0.314492 | 0.00215304 | 2.50E-09 |
| rs55770587 | T | C | 0.0288607 | 0.0413414 | 0.0413414 | 0.00502895 | 1.90E-08 |
| rs55840085 | A | G | 0.0202749 | 0.355505 | 0.355505 | 0.00209775 | 5.40E-27 |
| rs56033865 | A | G | 0.0189802 | 0.103472 | 0.103472 | 0.00331848 | 1.50E-08 |
| rs56046429 | C | T | -0.0151357 | 0.222481 | 0.222481 | 0.00244345 | 1.80E-10 |
| rs56047269 | T | C | 0.0139755 | 0.280887 | 0.280887 | 0.0022396 | 4.30E-10 |
| rs56196860 | A | C | 0.0594641 | 0.0306666 | 0.0306666 | 0.00632483 | 1.00E-22 |
| rs57310685 | C | T | 0.0119248 | 0.382644 | 0.382644 | 0.0020563 | 2.30E-09 |
| rs57400569 | A | G | 0.0164966 | 0.214565 | 0.214565 | 0.00243935 | 1.40E-10 |
| rs5745687 | T | C | 0.0354454 | 0.065697 | 0.065697 | 0.00407193 | 3.70E-20 |
| rs57467915 | A | G | -0.0567963 | 0.0147766 | 0.0147766 | 0.00859704 | 1.00E-11 |
| rs5751777 | T | C | -0.0192258 | 0.586367 | 0.413633 | 0.00204779 | 7.90E-22 |
| rs5757169 | A | G | -0.0124503 | 0.30528 | 0.30528 | 0.00219844 | 2.40E-09 |
| rs58263961 | T | C | 0.0146473 | 0.19247 | 0.19247 | 0.00255074 | 6.30E-09 |
| rs59774409 | T | C | 0.0516402 | 0.0819627 | 0.0819627 | 0.00367013 | 2.30E-46 |
| rs61154548 | T | C | -0.0334288 | 0.0557763 | 0.0557763 | 0.00437791 | 2.60E-14 |
| rs6129800 | A | G | 0.0256138 | 0.22312 | 0.22312 | 0.00241957 | 6.80E-28 |
| rs6142206 | A | G | -0.0145041 | 0.420918 | 0.420918 | 0.00204237 | 2.80E-14 |
| rs61754233 | C | G | 0.0356787 | 0.0198595 | 0.0198595 | 0.00726105 | 4.10E-09 |
| rs61856594 | G | A | 0.0110038 | 0.296207 | 0.296207 | 0.00218859 | 4.30E-08 |
| rs61935492 | G | T | -0.0276983 | 0.12737 | 0.12737 | 0.00300482 | 4.80E-23 |
| rs62292896 | A | G | -0.0162734 | 0.13107 | 0.13107 | 0.00298508 | 1.40E-09 |
| rs62433130 | T | C | -0.0190559 | 0.12241 | 0.12241 | 0.00307156 | 3.80E-12 |
| rs62576339 | C | T | 0.0298708 | 0.240059 | 0.240059 | 0.00235372 | 9.00E-38 |
| rs62577365 | T | C | -0.0273521 | 0.0535655 | 0.0535655 | 0.00446658 | 6.50E-11 |
| rs62580767 | C | T | 0.0266015 | 0.180597 | 0.180597 | 0.00261273 | 5.20E-30 |
| rs62618693 | T | C | 0.0414741 | 0.0442326 | 0.0442326 | 0.00496366 | 9.00E-18 |
| rs628751 | A | C | 0.0129359 | 0.520748 | 0.479252 | 0.00201163 | 4.10E-11 |
| rs638971 | A | G | 0.0763495 | 0.993354 | 0.006646 | 0.0123779 | 3.30E-09 |
| rs6415788 | T | G | -0.0137581 | 0.597182 | 0.402818 | 0.00206684 | 1.90E-12 |
| rs6424245 | C | A | 0.0107333 | 0.440021 | 0.440021 | 0.00200757 | 1.10E-08 |
| rs6445064 | G | A | 0.014524 | 0.668939 | 0.331061 | 0.00212706 | 5.60E-10 |
| rs645040 | T | G | -0.0655117 | 0.773075 | 0.226925 | 0.00239357 | 5.60E-179 |
| rs6479896 | C | T | 0.131071 | 0.47363 | 0.47363 | 0.00200139 | 1.00E-200 |
| rs6486122 | T | C | -0.0253949 | 0.689139 | 0.310861 | 0.00217054 | 5.60E-36 |
| rs6489190 | T | C | 0.0126315 | 0.206445 | 0.206445 | 0.00247179 | 1.00E-08 |
| rs6557781 | C | T | 0.0151942 | 0.835477 | 0.164523 | 0.00283458 | 2.30E-08 |
| rs66720010 | G | A | 0.0319913 | 0.372372 | 0.372372 | 0.00208358 | 8.10E-57 |
| rs67199213 | G | A | -0.029583 | 0.260951 | 0.260951 | 0.00228802 | 1.60E-43 |
| rs6720394 | G | T | 0.0193464 | 0.110298 | 0.110298 | 0.003182 | 1.40E-11 |
| rs6736913 | G | A | -0.0804034 | 0.976862 | 0.023138 | 0.00705593 | 1.50E-33 |
| rs6755571 | A | C | -0.0301056 | 0.066311 | 0.066311 | 0.00403164 | 2.70E-14 |
| rs6756943 | A | G | -0.0440705 | 0.698799 | 0.301201 | 0.00217335 | 1.50E-97 |
| rs67611724 | T | C | -0.0335632 | 0.154977 | 0.154977 | 0.00278365 | 3.10E-35 |
| rs6797405 | A | G | 0.0133459 | 0.636675 | 0.363325 | 0.00208442 | 1.90E-11 |
| rs6798189 | A | G | 0.0145595 | 0.265048 | 0.265048 | 0.00227091 | 5.60E-12 |
| rs6809436 | G | T | -0.0202434 | 0.080813 | 0.080813 | 0.00371263 | 3.80E-09 |
| rs6812193 | T | C | 0.0303929 | 0.375755 | 0.375755 | 0.00206649 | 2.70E-53 |
| rs6831256 | G | A | 0.0471454 | 0.422737 | 0.422737 | 0.00202852 | 3.20E-128 |
| rs6861681 | A | G | -0.0170834 | 0.30194 | 0.30194 | 0.00218527 | 3.50E-17 |
| rs6939861 | A | G | -0.0340709 | 0.26149 | 0.26149 | 0.00231398 | 2.80E-51 |
| rs6956344 | T | C | 0.0253299 | 0.0864089 | 0.0864089 | 0.00357032 | 2.00E-13 |
| rs7015812 | G | C | 0.012039 | 0.414876 | 0.414876 | 0.00203957 | 9.90E-10 |
| rs7026694 | C | T | 0.0207694 | 0.0792787 | 0.0792787 | 0.00371505 | 1.70E-08 |
| rs7109616 | T | C | -0.0386818 | 0.0246149 | 0.0246149 | 0.00651461 | 3.40E-09 |
| rs7134375 | A | C | 0.0143024 | 0.431393 | 0.431393 | 0.00201827 | 2.50E-12 |
| rs7161750 | C | A | -0.0593281 | 0.105541 | 0.105541 | 0.00327022 | 2.20E-74 |
| rs7175361 | A | G | 0.0222105 | 0.15867 | 0.15867 | 0.00275146 | 6.40E-17 |
| rs7220814 | G | A | -0.0396407 | 0.061345 | 0.061345 | 0.00404019 | 1.50E-24 |
| rs724577 | C | A | -0.0189375 | 0.738774 | 0.261226 | 0.00227752 | 1.10E-16 |
| rs72631343 | G | C | -0.0219298 | 0.128936 | 0.128936 | 0.00287384 | 7.60E-14 |
| rs72663933 | C | T | -0.0158543 | 0.132954 | 0.132954 | 0.00297328 | 9.30E-09 |
| rs72670345 | T | C | 0.0386548 | 0.0528547 | 0.0528547 | 0.00447298 | 1.10E-16 |
| rs72683923 | C | T | 0.0738895 | 0.0197173 | 0.0197173 | 0.00744304 | 5.60E-27 |
| rs727428 | C | T | 0.236988 | 0.556117 | 0.443883 | 0.0019417 | 1.00E-200 |
| rs72743115 | C | A | -0.0806144 | 0.0405754 | 0.0405754 | 0.00509558 | 5.90E-61 |
| rs72751639 | A | G | -0.0282582 | 0.0690727 | 0.0690727 | 0.00395963 | 2.40E-11 |
| rs72787511 | C | G | 0.0336959 | 0.0372384 | 0.0372384 | 0.00529057 | 1.90E-09 |
| rs72790275 | T | C | 0.0169229 | 0.458597 | 0.458597 | 0.00204269 | 1.20E-17 |
| rs72832032 | A | G | -0.0505715 | 0.0243271 | 0.0243271 | 0.00648803 | 4.60E-15 |
| rs72841430 | G | A | -0.313334 | 0.020486 | 0.020486 | 0.00678797 | 1.00E-200 |
| rs72902436 | A | G | 0.0160479 | 0.237134 | 0.237134 | 0.00236203 | 2.60E-14 |
| rs72906888 | T | G | 0.0295018 | 0.0907461 | 0.0907461 | 0.00346752 | 5.00E-17 |
| rs72948115 | T | C | -0.024587 | 0.0948757 | 0.0948757 | 0.00340333 | 2.80E-12 |
| rs7310409 | G | A | 0.040455 | 0.62056 | 0.37944 | 0.00206445 | 2.60E-97 |
| rs7314285 | G | T | 0.0868421 | 0.0683471 | 0.0683471 | 0.00396533 | 2.30E-115 |
| rs731839 | A | G | 0.0213152 | 0.665352 | 0.334648 | 0.0021299 | 3.20E-28 |
| rs73201506 | G | A | -0.0295749 | 0.045901 | 0.045901 | 0.00488458 | 9.70E-12 |
| rs738408 | T | C | 0.05444 | 0.208233 | 0.208233 | 0.00253073 | 3.90E-105 |
| rs7412 | T | C | 0.026561 | 0.0801702 | 0.0801702 | 0.00370536 | 1.10E-12 |
| rs7429135 | G | T | 0.0218192 | 0.840613 | 0.159387 | 0.00273761 | 2.50E-17 |
| rs74406200 | T | C | 0.0145327 | 0.188231 | 0.188231 | 0.00257769 | 2.20E-09 |
| rs7445090 | T | C | 0.0135097 | 0.686207 | 0.313793 | 0.00216658 | 2.00E-12 |
| rs7451021 | C | T | -0.0255358 | 0.685598 | 0.314402 | 0.00218684 | 2.40E-32 |
| rs7515341 | C | G | -0.0244627 | 0.059599 | 0.059599 | 0.00421438 | 1.50E-08 |
| rs7520897 | A | G | -0.0130375 | 0.400344 | 0.400344 | 0.00203145 | 2.10E-10 |
| rs7528979 | T | C | 0.0143753 | 0.157821 | 0.157821 | 0.00273303 | 2.50E-08 |
| rs756637 | G | A | 0.0208923 | 0.371877 | 0.371877 | 0.0022596 | 3.60E-20 |
| rs76074266 | G | C | 0.0265438 | 0.045066 | 0.045066 | 0.00490921 | 2.60E-08 |
| rs7644763 | T | C | -0.026145 | 0.905784 | 0.094216 | 0.00361544 | 6.50E-14 |
| rs76610881 | G | A | 0.0423756 | 0.108705 | 0.108705 | 0.00322 | 1.00E-42 |
| rs7694379 | A | G | -0.0438188 | 0.431434 | 0.431434 | 0.00202181 | 2.80E-114 |
| rs7697204 | T | C | -0.0314324 | 0.741942 | 0.258058 | 0.00229025 | 2.10E-45 |
| rs7726159 | A | C | -0.0116575 | 0.327177 | 0.327177 | 0.00214004 | 1.00E-09 |
| rs7756992 | G | A | -0.0183914 | 0.265663 | 0.265663 | 0.00227663 | 3.70E-16 |
| rs77738818 | A | G | -0.0417608 | 0.0239842 | 0.0239842 | 0.00654888 | 2.80E-09 |
| rs7786120 | C | T | 0.0175343 | 0.357098 | 0.357098 | 0.00209564 | 9.10E-18 |
| rs7789908 | G | T | -0.0190334 | 0.792149 | 0.207851 | 0.00247279 | 9.50E-16 |
| rs78081080 | T | C | -0.102974 | 0.078375 | 0.078375 | 0.00365807 | 1.50E-178 |
| rs7850488 | C | G | -0.0134535 | 0.317395 | 0.317395 | 0.00216438 | 1.30E-08 |
| rs7860634 | A | G | 0.0225208 | 0.55687 | 0.44313 | 0.0020954 | 1.30E-29 |
| rs7903146 | T | C | -0.0228374 | 0.290206 | 0.290206 | 0.00219782 | 3.20E-29 |
| rs79515366 | G | A | -0.0224235 | 0.0608517 | 0.0608517 | 0.00417474 | 5.20E-09 |
| rs79784917 | T | G | 0.0218681 | 0.126997 | 0.126997 | 0.00308804 | 5.50E-15 |
| rs8017377 | A | G | -0.036066 | 0.470108 | 0.470108 | 0.00206993 | 6.70E-69 |
| rs8023580 | C | T | 0.0825808 | 0.276919 | 0.276919 | 0.00224914 | 1.00E-200 |
| rs802658 | C | T | 0.0141566 | 0.245433 | 0.245433 | 0.00233145 | 2.80E-10 |
| rs803736 | A | G | -0.0175202 | 0.854922 | 0.145078 | 0.00287972 | 4.60E-11 |
| rs8066822 | C | T | 0.044438 | 0.0185134 | 0.0185134 | 0.00721406 | 9.00E-10 |
| rs8095050 | A | G | 0.0170916 | 0.582491 | 0.417509 | 0.00204839 | 3.20E-17 |
| rs811970 | G | A | 0.0138261 | 0.764177 | 0.235823 | 0.00236004 | 7.40E-10 |
| rs849134 | G | A | 0.0251594 | 0.502868 | 0.497132 | 0.00200381 | 1.60E-37 |
| rs870526 | T | C | -0.013369 | 0.523263 | 0.476737 | 0.00199675 | 7.70E-13 |
| rs892161 | G | A | -0.0123828 | 0.612838 | 0.387162 | 0.00209702 | 1.30E-11 |
| rs9379084 | A | G | -0.0361618 | 0.11659 | 0.11659 | 0.00320919 | 4.40E-33 |
| rs9427104 | T | C | 0.0293486 | 0.478426 | 0.478426 | 0.00199433 | 4.00E-56 |
| rs9491675 | A | G | -0.0159832 | 0.143833 | 0.143833 | 0.00286398 | 4.50E-09 |
| rs9556403 | G | A | 0.0226244 | 0.352225 | 0.352225 | 0.00211001 | 9.40E-31 |
| rs9617090 | T | C | 0.0136095 | 0.43484 | 0.43484 | 0.00205458 | 2.40E-12 |
| rs9634098 | C | T | 0.059323 | 0.963555 | 0.036445 | 0.00533505 | 5.20E-31 |
| rs9644032 | G | T | -0.0181446 | 0.632287 | 0.367713 | 0.00208483 | 3.70E-20 |
| rs9757252 | C | T | -0.0123564 | 0.617029 | 0.382971 | 0.0020627 | 1.70E-08 |
| rs976002 | G | A | 0.0385776 | 0.243659 | 0.243659 | 0.00235537 | 2.60E-65 |
| rs9847154 | C | T | 0.0110714 | 0.42472 | 0.42472 | 0.00202431 | 1.10E-08 |
| rs988911 | A | G | 0.0222509 | 0.13422 | 0.13422 | 0.00293187 | 3.80E-16 |
| rs9894648 | C | T | 0.0247604 | 0.621256 | 0.378744 | 0.00199432 | 1.20E-35 |
| rs9944207 | T | A | 0.0128803 | 0.251819 | 0.251819 | 0.00231854 | 2.30E-08 |
| rs997633 | T | A | -0.0133894 | 0.160965 | 0.160965 | 0.00274879 | 4.00E-08 |

a The variants together explain 35.3% of the variation in Sex Hormone-Binding Globulin (SHBG) Levels (R2 = 0.353; F (TOTAL) = 553.389).

b Increase in Sex Hormone-Binding Globulin (SHBG) Levels in per effect allele.

c Effect Allele Frequency

d Minor Allele Frequency

| Characteristics of the single nucleotide polymorphisms (SNP) used as instrumental variables for Triglycerides Levela |
| --- |

| SNP | Effect Allele | Other Allele | Effect (BETA)b | EAFc | MAFd | Standard Error | P-Value |
| --- | --- | --- | --- | --- | --- | --- | --- |
| rs10096633 | T | C | -0.1524 | 0.1636 | 0.1636 | 0.0072 | 3.08E-92 |
| rs10401969 | C | T | -0.1319 | 0.07124 | 0.07124 | 0.0086 | 4.26E-50 |
| rs10440120 | A | C | -0.0371 | 0.1675 | 0.1675 | 0.0062 | 1.30E-08 |
| rs11208004 | A | G | -0.0743 | 0.2955 | 0.2955 | 0.005 | 1.55E-44 |
| rs1260326 | C | T | -0.113 | 0.5871 | 0.4129 | 0.0048 | 5.20E-112 |
| rs1532085 | G | A | -0.0303 | 0.6332 | 0.3668 | 0.0048 | 4.23E-09 |
| rs1674999 | A | G | 0.0297 | 0.5739 | 0.4261 | 0.0047 | 8.63E-10 |
| rs174562 | G | A | 0.0418 | 0.3575 | 0.3575 | 0.0049 | 4.25E-17 |
| rs2138157 | C | A | 0.0304 | 0.6253 | 0.3747 | 0.005 | 5.31E-09 |
| rs2144300 | T | C | -0.0439 | 0.5844 | 0.4156 | 0.0047 | 3.65E-19 |
| rs2419604 | G | A | 0.0303 | 0.6821 | 0.3179 | 0.0052 | 1.03E-09 |
| rs247616 | T | C | -0.0422 | 0.2929 | 0.2929 | 0.005 | 8.12E-17 |
| rs28650790 | T | C | 0.0414 | 0.1689 | 0.1689 | 0.0063 | 2.66E-09 |
| rs28718232 | G | A | 0.0413 | 0.2309 | 0.2309 | 0.0059 | 1.14E-10 |
| rs2954029 | T | A | -0.085 | 0.4683 | 0.4683 | 0.0047 | 2.32E-67 |
| rs35332062 | A | G | -0.107 | 0.1227 | 0.1227 | 0.007 | 7.04E-48 |
| rs3741298 | T | C | -0.1653 | 0.777 | 0.223 | 0.0057 | 1.13E-157 |
| rs439401 | C | T | 0.0665 | 0.6201 | 0.3799 | 0.0049 | 4.32E-38 |
| rs492571 | C | T | 0.0882 | 0.04222 | 0.04222 | 0.0128 | 1.14E-09 |
| rs588136 | T | C | -0.0554 | 0.7942 | 0.2058 | 0.0057 | 4.96E-21 |
| rs6065906 | C | T | 0.0586 | 0.1979 | 0.1979 | 0.006 | 2.71E-20 |
| rs61905084 | C | T | -0.0563 | 0.1649 | 0.1649 | 0.0059 | 2.18E-20 |
| rs668459 | T | C | -0.0327 | 0.562 | 0.438 | 0.0047 | 3.77E-11 |
| rs676210 | A | G | -0.0671 | 0.2309 | 0.2309 | 0.0056 | 5.56E-29 |
| rs6831256 | G | A | 0.0286 | 0.409 | 0.409 | 0.0048 | 2.59E-09 |
| rs7082470 | A | G | -0.0246 | 0.467 | 0.467 | 0.0047 | 2.63E-08 |
| rs7745906 | A | G | 0.0492 | 0.1781 | 0.1781 | 0.0065 | 2.60E-11 |
| rs998584 | A | C | 0.0294 | 0.5145 | 0.4855 | 0.0048 | 2.51E-10 |

a The variants together explain 9.6% of the variation in Triglycerides Level (R2 = 0.096; F (TOTAL) = 646.450).

b Increase in Triglycerides Level in per effect allele.

c Effect Allele Frequency

d Minor Allele Frequency

| Characteristics of the single nucleotide polymorphisms (SNP) used as instrumental variables for Total cholesterol Levela |
| --- |

| SNP | Effect Allele | Other Allele | Effect (BETA)b | EAFc | MAFd | Standard Error | P-Value |
| --- | --- | --- | --- | --- | --- | --- | --- |
| rs10088180 | G | A | -0.0228 | 0.6781 | 0.3219 | 0.004 | 6.02E-10 |
| rs10468017 | T | C | 0.0617 | 0.2757 | 0.2757 | 0.004 | 7.23E-48 |
| rs10773003 | A | G | 0.0369 | 0.08839 | 0.08839 | 0.0058 | 4.08E-09 |
| rs10832962 | T | C | 0.0315 | 0.719 | 0.281 | 0.0039 | 1.54E-14 |
| rs10900221 | A | G | 0.0255 | 0.2731 | 0.2731 | 0.0041 | 7.96E-09 |
| rs10904908 | G | A | 0.025 | 0.4538 | 0.4538 | 0.0036 | 2.60E-11 |
| rs11153594 | T | C | -0.029 | 0.3918 | 0.3918 | 0.0036 | 1.27E-14 |
| rs112201728 | T | C | 0.0581 | 0.05805 | 0.05805 | 0.0099 | 1.20E-08 |
| rs11220462 | A | G | 0.0474 | 0.1425 | 0.1425 | 0.0058 | 5.49E-15 |
| rs11563251 | T | C | 0.0368 | 0.1253 | 0.1253 | 0.0059 | 1.27E-09 |
| rs11591147 | T | G | -0.3341 | 0.01715 | 0.01715 | 0.0173 | 8.83E-86 |
| rs11694172 | G | A | 0.0277 | 0.2164 | 0.2164 | 0.0041 | 1.95E-09 |
| rs11753995 | A | G | 0.0489 | 0.1464 | 0.1464 | 0.0048 | 1.84E-23 |
| rs11789603 | T | C | 0.0427 | 0.08971 | 0.08971 | 0.0062 | 1.44E-11 |
| rs11802413 | T | C | 0.0287 | 0.5369 | 0.4631 | 0.0035 | 1.58E-14 |
| rs12412743 | T | C | -0.0298 | 0.153 | 0.153 | 0.0047 | 6.98E-10 |
| rs12670798 | C | T | 0.0364 | 0.2243 | 0.2243 | 0.0041 | 9.48E-17 |
| rs12916 | C | T | 0.0684 | 0.4314 | 0.4314 | 0.0036 | 4.55E-74 |
| rs13315871 | A | G | -0.0355 | 0.08047 | 0.08047 | 0.0061 | 3.48E-08 |
| rs138777 | G | A | -0.0214 | 0.6517 | 0.3483 | 0.0037 | 4.74E-08 |
| rs1535 | G | A | -0.0497 | 0.3628 | 0.3628 | 0.0037 | 8.62E-39 |
| rs17526895 | G | A | -0.042 | 0.07784 | 0.07784 | 0.0067 | 5.78E-09 |
| rs1800562 | A | G | -0.0565 | 0.04617 | 0.04617 | 0.0077 | 1.91E-12 |
| rs1800961 | T | C | -0.1062 | 0.0343 | 0.0343 | 0.0101 | 1.34E-24 |
| rs181360 | G | T | -0.0278 | 0.1992 | 0.1992 | 0.0043 | 7.32E-10 |
| rs1883025 | T | C | -0.0671 | 0.2427 | 0.2427 | 0.0042 | 5.75E-53 |
| rs1997243 | G | A | 0.0332 | 0.1306 | 0.1306 | 0.005 | 2.72E-10 |
| rs2000999 | A | G | 0.0617 | 0.1847 | 0.1847 | 0.0044 | 6.80E-41 |
| rs2030746 | T | C | 0.0199 | 0.3984 | 0.3984 | 0.0037 | 3.60E-08 |
| rs2066714 | C | T | 0.0442 | 0.1201 | 0.1201 | 0.0076 | 1.14E-08 |
| rs2073547 | G | A | 0.0456 | 0.1939 | 0.1939 | 0.0047 | 3.83E-21 |
| rs2156552 | T | A | 0.057 | 0.8219 | 0.1781 | 0.0047 | 1.25E-31 |
| rs2228603 | T | C | -0.1217 | 0.07124 | 0.07124 | 0.0069 | 1.05E-62 |
| rs2235367 | G | A | 0.0357 | 0.4565 | 0.4565 | 0.0035 | 7.22E-25 |
| rs2244608 | G | A | 0.0313 | 0.3391 | 0.3391 | 0.0037 | 9.62E-18 |
| rs2255141 | G | A | -0.0314 | 0.6807 | 0.3193 | 0.0039 | 6.51E-16 |
| rs2277862 | T | C | -0.0349 | 0.1319 | 0.1319 | 0.0052 | 5.26E-11 |
| rs2287623 | A | G | -0.0273 | 0.595 | 0.405 | 0.0036 | 4.09E-12 |
| rs2315065 | A | C | 0.1102 | 0.08707 | 0.08707 | 0.0158 | 1.10E-11 |
| rs247616 | T | C | 0.0499 | 0.2929 | 0.2929 | 0.004 | 4.47E-32 |
| rs2642438 | G | A | 0.037 | 0.7454 | 0.2546 | 0.004 | 1.28E-18 |
| rs2737252 | A | G | -0.0331 | 0.2559 | 0.2559 | 0.0039 | 1.63E-16 |
| rs2738459 | C | A | -0.0387 | 0.4446 | 0.4446 | 0.0057 | 2.11E-11 |
| rs281393 | T | C | -0.0322 | 0.3734 | 0.3734 | 0.0055 | 4.26E-08 |
| rs2814982 | T | C | -0.0441 | 0.1069 | 0.1069 | 0.0057 | 3.68E-15 |
| rs2886232 | C | T | -0.0358 | 0.8799 | 0.1201 | 0.0062 | 3.87E-08 |
| rs2954029 | T | A | -0.0622 | 0.4683 | 0.4683 | 0.0035 | 2.42E-65 |
| rs314253 | C | T | -0.0233 | 0.3351 | 0.3351 | 0.0037 | 2.81E-10 |
| rs3184504 | C | T | 0.0318 | 0.5343 | 0.4657 | 0.0037 | 1.62E-17 |
| rs3757354 | T | C | -0.0348 | 0.2098 | 0.2098 | 0.0042 | 2.22E-15 |
| rs3780181 | G | A | -0.0442 | 0.05277 | 0.05277 | 0.0071 | 6.67E-10 |
| rs386003 | T | G | 0.0344 | 0.1992 | 0.1992 | 0.0058 | 4.52E-08 |
| rs4253772 | T | C | 0.0322 | 0.1187 | 0.1187 | 0.0058 | 9.85E-09 |
| rs4530754 | A | G | 0.0228 | 0.5818 | 0.4182 | 0.0035 | 1.68E-09 |
| rs4738684 | G | A | -0.0392 | 0.6478 | 0.3522 | 0.0037 | 1.12E-23 |
| rs4752805 | G | A | 0.0251 | 0.2467 | 0.2467 | 0.0041 | 1.62E-09 |
| rs4883201 | G | A | -0.035 | 0.1135 | 0.1135 | 0.0056 | 1.74E-09 |
| rs4988235 | A | G | -0.0308 | 0.5237 | 0.4763 | 0.004 | 3.97E-14 |
| rs515135 | C | T | 0.1238 | 0.7823 | 0.2177 | 0.0046 | 6.38E-151 |
| rs558971 | G | A | 0.0398 | 0.5303 | 0.4697 | 0.0036 | 7.02E-28 |
| rs579459 | C | T | 0.062 | 0.215 | 0.215 | 0.0044 | 8.83E-42 |
| rs581080 | C | G | 0.0377 | 0.8206 | 0.1794 | 0.0047 | 1.02E-13 |
| rs6016373 | G | A | -0.0319 | 0.3734 | 0.3734 | 0.0036 | 1.00E-17 |
| rs633695 | G | A | 0.0433 | 0.285 | 0.285 | 0.0058 | 1.05E-14 |
| rs646776 | T | C | 0.1272 | 0.7876 | 0.2124 | 0.0042 | 4.78E-187 |
| rs6504872 | T | C | 0.025 | 0.4723 | 0.4723 | 0.0035 | 6.99E-12 |
| rs6511720 | T | G | -0.1851 | 0.09763 | 0.09763 | 0.0059 | 1.00E-200 |
| rs6544713 | C | T | -0.0773 | 0.7058 | 0.2942 | 0.004 | 1.69E-81 |
| rs6573778 | C | T | -0.0263 | 0.529 | 0.471 | 0.0039 | 2.96E-11 |
| rs6603981 | T | C | 0.0351 | 0.8061 | 0.1939 | 0.0043 | 7.85E-15 |
| rs6709904 | G | A | -0.0545 | 0.1135 | 0.1135 | 0.0083 | 8.39E-10 |
| rs6818397 | G | T | -0.0254 | 0.5871 | 0.4129 | 0.0039 | 9.51E-11 |
| rs6882076 | C | T | 0.0508 | 0.6662 | 0.3338 | 0.0037 | 5.35E-41 |
| rs7412 | T | C | -0.3736 | 0.06596 | 0.06596 | 0.0096 | 1.00E-200 |
| rs7534572 | G | C | 0.0629 | 0.69 | 0.31 | 0.0055 | 3.60E-28 |
| rs7551981 | T | G | 0.0358 | 0.595 | 0.405 | 0.0037 | 7.50E-22 |
| rs75687619 | T | G | 0.1592 | 0.02375 | 0.02375 | 0.0153 | 3.61E-22 |
| rs7616006 | G | A | -0.0315 | 0.4446 | 0.4446 | 0.0036 | 8.41E-17 |
| rs7640978 | T | C | -0.0376 | 0.1055 | 0.1055 | 0.0066 | 1.66E-08 |
| rs780093 | C | T | -0.0515 | 0.5871 | 0.4129 | 0.0036 | 2.59E-42 |
| rs7832643 | T | G | 0.0289 | 0.405 | 0.405 | 0.0037 | 3.12E-13 |
| rs8103315 | A | C | 0.0422 | 0.1359 | 0.1359 | 0.0055 | 5.94E-15 |
| rs9272775 | C | T | 0.0317 | 0.2823 | 0.2823 | 0.0055 | 2.13E-08 |
| rs9306897 | C | T | -0.0488 | 0.6966 | 0.3034 | 0.0037 | 7.51E-37 |
| rs9376090 | C | T | -0.0254 | 0.2718 | 0.2718 | 0.004 | 2.60E-09 |
| rs9391858 | G | A | 0.0495 | 0.1939 | 0.1939 | 0.005 | 7.20E-22 |
| rs964184 | C | G | -0.1214 | 0.234 | 0.234 | 0.0076 | 2.84E-55 |
| rs9987289 | G | A | 0.0842 | 0.9248 | 0.0752 | 0.0063 | 1.84E-36 |

a The variants together explain 6.3% of the variation in Total cholesterol Level (R2 = 0.063; F (TOTAL) = 134.940).

b Increase in Total cholesterol Level in per effect allele.

c Effect Allele Frequency

d Minor Allele Frequency

| Characteristics of the single nucleotide polymorphisms (SNP) used as instrumental variables for High Density Lipoprotein cholesterol(HDL)a |
| --- |

| SNP | Effect Allele | Other Allele | Effect (BETA)b | EAFc | MAFd | Standard Error | P-Value |
| --- | --- | --- | --- | --- | --- | --- | --- |
| rs10019888 | G | A | -0.027 | 0.8171 | 0.1829 | 0.0046 | 4.90E-08 |
| rs10087900 | A | G | -0.0231 | 0.4463 | 0.4463 | 0.0036 | 2.17E-09 |
| rs10282707 | T | C | -0.025 | 0.5905 | 0.4095 | 0.0035 | 1.02E-11 |
| rs10468017 | T | C | 0.1179 | 0.7167 | 0.2833 | 0.0038 | 1.21E-188 |
| rs1047891 | A | C | -0.0269 | 0.3012 | 0.3012 | 0.0039 | 8.73E-10 |
| rs10761771 | C | T | 0.0198 | 0.4861 | 0.4861 | 0.0034 | 4.12E-09 |
| rs10808546 | T | C | 0.0409 | 0.5686 | 0.4314 | 0.0034 | 4.11E-30 |
| rs11045163 | G | A | 0.0217 | 0.6054 | 0.3946 | 0.0035 | 3.20E-09 |
| rs11065987 | G | A | -0.0222 | 0.5805 | 0.4195 | 0.0035 | 1.23E-09 |
| rs11789603 | T | C | 0.06 | 0.9066 | 0.0934 | 0.006 | 3.69E-21 |
| rs12133576 | G | A | -0.0243 | 0.3638 | 0.3638 | 0.0035 | 6.15E-11 |
| rs12145743 | G | T | 0.0203 | 0.334 | 0.334 | 0.0036 | 1.80E-08 |
| rs12286037 | T | C | -0.1052 | 0.9294 | 0.0706 | 0.007 | 2.80E-47 |
| rs12328675 | C | T | 0.0447 | 0.1571 | 0.1571 | 0.0052 | 2.13E-15 |
| rs12412743 | T | C | -0.0291 | 0.838 | 0.162 | 0.0045 | 1.31E-09 |
| rs12740374 | T | G | 0.0343 | 0.7873 | 0.2127 | 0.0041 | 1.69E-15 |
| rs12748152 | T | C | -0.0506 | 0.9274 | 0.0726 | 0.0062 | 9.74E-16 |
| rs1279840 | C | T | -0.0301 | 0.7535 | 0.2465 | 0.004 | 2.14E-12 |
| rs13099479 | A | G | 0.036 | 0.0905 | 0.0905 | 0.0062 | 1.82E-08 |
| rs13107325 | T | C | -0.0708 | 0.0795 | 0.0795 | 0.0078 | 1.06E-15 |
| rs16842 | C | T | -0.03 | 0.2555 | 0.2555 | 0.0038 | 3.82E-14 |
| rs1689797 | A | C | -0.0358 | 0.6779 | 0.3221 | 0.0036 | 2.85E-21 |
| rs16942887 | A | G | 0.0831 | 0.1342 | 0.1342 | 0.0051 | 8.28E-54 |
| rs17145738 | T | C | 0.0408 | 0.8867 | 0.1133 | 0.0053 | 4.95E-13 |
| rs17173637 | C | T | -0.0363 | 0.0905 | 0.0905 | 0.0057 | 1.90E-08 |
| rs174535 | C | T | -0.0392 | 0.234 | 0.234 | 0.0035 | 9.04E-28 |
| rs181362 | T | C | -0.0379 | 0.1938 | 0.1938 | 0.0042 | 4.30E-18 |
| rs1883025 | T | C | -0.0698 | 0.2396 | 0.2396 | 0.0041 | 1.50E-65 |
| rs1942880 | T | C | -0.0228 | 0.662 | 0.338 | 0.0036 | 1.29E-08 |
| rs1980493 | C | T | -0.0318 | 0.8827 | 0.1173 | 0.0048 | 3.76E-10 |
| rs205262 | G | A | -0.0283 | 0.2793 | 0.2793 | 0.0039 | 3.88E-13 |
| rs2066714 | C | T | 0.0453 | 0.8648 | 0.1352 | 0.0071 | 7.26E-10 |
| rs2075650 | G | A | -0.0554 | 0.8688 | 0.1312 | 0.0051 | 9.72E-26 |
| rs2160669 | T | C | 0.0944 | 0.0934 | 0.0934 | 0.0069 | 1.84E-36 |
| rs2240327 | G | A | 0.0242 | 0.493 | 0.493 | 0.0034 | 1.11E-11 |
| rs2241210 | G | A | 0.0332 | 0.5417 | 0.4583 | 0.0035 | 2.49E-20 |
| rs2255141 | G | A | -0.0337 | 0.3091 | 0.3091 | 0.0037 | 2.35E-17 |
| rs2278236 | A | G | 0.0331 | 0.4592 | 0.4592 | 0.0035 | 3.18E-18 |
| rs2288911 | G | T | 0.0302 | 0.507 | 0.493 | 0.0036 | 2.84E-15 |
| rs2290547 | A | G | -0.0297 | 0.233 | 0.233 | 0.0046 | 3.69E-09 |
| rs2293889 | G | T | 0.0312 | 0.5835 | 0.4165 | 0.0035 | 4.27E-17 |
| rs2454722 | G | A | 0.0351 | 0.8231 | 0.1769 | 0.0044 | 3.31E-14 |
| rs247616 | T | C | 0.243 | 0.7078 | 0.2922 | 0.0038 | 1.00E-200 |
| rs2602836 | G | A | -0.0192 | 0.4245 | 0.4245 | 0.0034 | 4.96E-08 |
| rs2606736 | T | C | -0.0246 | 0.5885 | 0.4115 | 0.0043 | 4.80E-08 |
| rs2642438 | G | A | 0.0303 | 0.2783 | 0.2783 | 0.0039 | 7.78E-14 |
| rs289745 | A | C | 0.0276 | 0.3956 | 0.3956 | 0.0041 | 2.28E-20 |
| rs2925979 | C | T | 0.0351 | 0.2883 | 0.2883 | 0.0037 | 1.32E-19 |
| rs2972146 | T | G | -0.0323 | 0.6252 | 0.3748 | 0.0035 | 1.85E-17 |
| rs326214 | A | G | -0.0609 | 0.6899 | 0.3101 | 0.0045 | 2.17E-36 |
| rs3741414 | T | C | 0.0296 | 0.1948 | 0.1948 | 0.004 | 6.10E-14 |
| rs3822072 | A | G | -0.0251 | 0.5209 | 0.4791 | 0.0034 | 4.06E-12 |
| rs3829502 | A | G | 0.0482 | 0.4105 | 0.4105 | 0.0051 | 1.46E-20 |
| rs3936511 | G | A | -0.0308 | 0.1779 | 0.1779 | 0.0046 | 2.96E-09 |
| rs3996352 | G | A | 0.0296 | 0.5517 | 0.4483 | 0.0034 | 3.59E-17 |
| rs4148005 | G | T | -0.0283 | 0.6750 | 0.325 | 0.0036 | 5.74E-14 |
| rs4240624 | A | G | 0.0818 | 0.9254 | 0.0746 | 0.0058 | 1.32E-45 |
| rs424346 | T | C | 0.0679 | 0.0417 | 0.0417 | 0.0113 | 4.84E-08 |
| rs4379922 | C | T | 0.0247 | 0.3489 | 0.3489 | 0.0036 | 9.56E-12 |
| rs4465830 | G | A | -0.0597 | 0.7962 | 0.2038 | 0.0044 | 5.17E-40 |
| rs4650994 | A | G | -0.021 | 0.4632 | 0.4632 | 0.0034 | 6.70E-09 |
| rs4660293 | G | A | -0.0353 | 0.7654 | 0.2346 | 0.004 | 2.86E-18 |
| rs4846914 | A | G | 0.0479 | 0.6014 | 0.3986 | 0.0034 | 3.51E-41 |
| rs4917014 | G | T | 0.0222 | 0.3539 | 0.3539 | 0.0036 | 1.03E-08 |
| rs492571 | C | T | -0.0663 | 0.0427 | 0.0427 | 0.009 | 1.27E-12 |
| rs4939883 | C | T | 0.0799 | 0.8300 | 0.17 | 0.0045 | 1.80E-66 |
| rs4969178 | G | A | 0.0263 | 0.3847 | 0.3847 | 0.0035 | 1.53E-12 |
| rs4983559 | A | G | -0.0197 | 0.6083 | 0.3917 | 0.0036 | 9.57E-09 |
| rs499974 | A | C | -0.0263 | 0.8290 | 0.171 | 0.0044 | 1.12E-08 |
| rs6031587 | T | C | -0.0488 | 0.9384 | 0.0616 | 0.0074 | 1.92E-09 |
| rs633695 | G | A | 0.0885 | 0.7197 | 0.2803 | 0.0054 | 7.82E-58 |
| rs634869 | C | T | 0.0234 | 0.5696 | 0.4304 | 0.0034 | 1.00E-10 |
| rs6509859 | T | C | -0.0328 | 0.7157 | 0.2843 | 0.0046 | 8.95E-11 |
| rs676210 | A | G | 0.066 | 0.2177 | 0.2177 | 0.004 | 2.34E-54 |
| rs6805251 | C | T | -0.02 | 0.6193 | 0.3807 | 0.0035 | 1.33E-08 |
| rs686030 | A | C | 0.055 | 0.8698 | 0.1302 | 0.0049 | 4.29E-27 |
| rs702485 | G | A | 0.0243 | 0.5646 | 0.4354 | 0.0034 | 6.45E-12 |
| rs7306660 | A | G | -0.0345 | 0.3728 | 0.3728 | 0.0036 | 3.34E-19 |
| rs731839 | A | G | 0.022 | 0.3330 | 0.333 | 0.0037 | 3.44E-09 |
| rs737337 | C | T | -0.0565 | 0.0736 | 0.0736 | 0.0061 | 4.56E-17 |
| rs765548 | T | C | 0.1065 | 0.7177 | 0.2823 | 0.0038 | 7.03E-153 |
| rs838876 | G | A | -0.0493 | 0.3231 | 0.3231 | 0.0039 | 7.32E-33 |
| rs931992 | T | G | 0.034 | 0.6740 | 0.326 | 0.0036 | 5.45E-20 |
| rs9457931 | G | A | -0.0552 | 0.9453 | 0.0547 | 0.0073 | 7.30E-13 |
| rs9491696 | G | C | -0.0203 | 0.5437 | 0.4563 | 0.0034 | 5.21E-10 |
| rs970548 | C | A | 0.0258 | 0.7256 | 0.2744 | 0.0039 | 1.71E-10 |
| rs998584 | A | C | -0.026 | 0.4960 | 0.496 | 0.0038 | 2.27E-11 |

a The variants together explain 12.1% of the variation in High Density Lipoprotein cholesterol(HDL) (R2 = 0.121; F (TOTAL) = 262.151).

b Increase in High Density Lipoprotein cholesterol(HDL) in per effect allele.

c Effect Allele Frequency

d Minor Allele Frequency

| Characteristics of the single nucleotide polymorphisms (SNP) used as instrumental variables for Low Density Lipoprotein cholesterol(LDL)a |
| --- |

| SNP | Effect Allele | Other Allele | Effect (BETA)b | EAFc | MAFd | Standard Error | P-Value |
| --- | --- | --- | --- | --- | --- | --- | --- |
| rs10195252 | C | T | -0.0238 | 0.4423 | 0.4423 | 0.0039 | 3.81E-08 |
| rs1030431 | G | A | -0.0344 | 0.339 | 0.339 | 0.0038 | 5.97E-17 |
| rs10832962 | T | C | 0.032 | 0.2833 | 0.2833 | 0.004 | 6.62E-14 |
| rs10947332 | A | G | 0.0504 | 0.1362 | 0.1362 | 0.0056 | 6.97E-18 |
| rs11065987 | G | A | -0.0269 | 0.5805 | 0.4195 | 0.0038 | 1.20E-11 |
| rs112201728 | T | C | 0.0675 | 0.9404 | 0.0596 | 0.0104 | 8.51E-10 |
| rs11220462 | A | G | 0.059 | 0.1322 | 0.1322 | 0.0059 | 6.61E-21 |
| rs1129555 | G | A | -0.0303 | 0.6889 | 0.3111 | 0.004 | 1.54E-13 |
| rs11563251 | T | C | 0.0345 | 0.8817 | 0.1183 | 0.0062 | 4.50E-08 |
| rs11591147 | T | G | -0.497 | 0.9791 | 0.0209 | 0.018 | 8.57E-143 |
| rs1169288 | C | A | 0.0375 | 0.339 | 0.339 | 0.004 | 6.45E-21 |
| rs117733303 | G | A | 0.1551 | 0.9881 | 0.0119 | 0.022 | 8.47E-11 |
| rs11802413 | T | C | 0.0323 | 0.4523 | 0.4523 | 0.0036 | 5.28E-17 |
| rs12066643 | T | C | -0.0389 | 0.8807 | 0.1193 | 0.0064 | 1.06E-08 |
| rs1250229 | C | T | 0.0243 | 0.7684 | 0.2316 | 0.0042 | 3.13E-08 |
| rs12670798 | C | T | 0.0344 | 0.2187 | 0.2187 | 0.0043 | 4.81E-14 |
| rs12740374 | T | G | -0.161 | 0.7873 | 0.2127 | 0.0044 | 1.00E-200 |
| rs12748152 | T | C | 0.0499 | 0.9274 | 0.0726 | 0.0066 | 3.21E-12 |
| rs1367117 | A | G | 0.1186 | 0.2982 | 0.2982 | 0.004 | 9.48E-183 |
| rs1408272 | G | T | -0.052 | 0.9503 | 0.0497 | 0.0083 | 3.68E-09 |
| rs1535 | G | A | -0.0529 | 0.6501 | 0.3499 | 0.0038 | 7.77E-41 |
| rs1564348 | C | T | 0.0481 | 0.837 | 0.163 | 0.005 | 2.76E-21 |
| rs16831243 | T | C | 0.0378 | 0.8151 | 0.1849 | 0.0055 | 9.06E-12 |
| rs17345563 | G | A | -0.0358 | 0.8867 | 0.1133 | 0.0057 | 2.03E-09 |
| rs17508045 | C | T | -0.0488 | 0.0746 | 0.0746 | 0.0066 | 4.91E-12 |
| rs1800961 | T | C | -0.0685 | 0.9632 | 0.0368 | 0.0106 | 6.03E-10 |
| rs1801689 | C | A | 0.1028 | 0.0407 | 0.0407 | 0.0139 | 9.81E-12 |
| rs1883025 | T | C | -0.0296 | 0.2396 | 0.2396 | 0.0044 | 6.14E-11 |
| rs2000999 | A | G | 0.065 | 0.1918 | 0.1918 | 0.0046 | 4.22E-41 |
| rs2073547 | G | A | 0.0485 | 0.1948 | 0.1948 | 0.0049 | 1.92E-21 |
| rs2228603 | T | C | -0.104 | 0.0676 | 0.0676 | 0.0072 | 4.43E-44 |
| rs2294261 | C | A | -0.0333 | 0.508 | 0.492 | 0.0037 | 6.57E-17 |
| rs2328223 | C | A | 0.0299 | 0.7664 | 0.2336 | 0.005 | 5.63E-09 |
| rs247616 | T | C | -0.0547 | 0.7078 | 0.2922 | 0.0041 | 2.57E-37 |
| rs2495495 | C | T | -0.0342 | 0.1302 | 0.1302 | 0.0059 | 3.52E-08 |
| rs2587534 | A | G | 0.0391 | 0.4871 | 0.4871 | 0.0037 | 8.06E-25 |
| rs2642438 | G | A | 0.0352 | 0.2783 | 0.2783 | 0.0042 | 7.32E-16 |
| rs267733 | G | A | -0.0331 | 0.8618 | 0.1382 | 0.0053 | 5.29E-09 |
| rs2710642 | A | G | 0.0239 | 0.6252 | 0.3748 | 0.0038 | 6.09E-09 |
| rs2737252 | A | G | -0.0314 | 0.2396 | 0.2396 | 0.0041 | 7.04E-14 |
| rs2738459 | C | A | -0.0532 | 0.183 | 0.183 | 0.0058 | 2.26E-19 |
| rs2886232 | C | T | -0.0451 | 0.8867 | 0.1133 | 0.0064 | 3.88E-11 |
| rs2954029 | T | A | -0.0564 | 0.5517 | 0.4483 | 0.0036 | 2.10E-50 |
| rs314253 | C | T | -0.0242 | 0.666 | 0.334 | 0.0038 | 3.44E-10 |
| rs364585 | G | A | 0.0249 | 0.3628 | 0.3628 | 0.0038 | 4.28E-10 |
| rs3758348 | C | G | 0.0543 | 0.1501 | 0.1501 | 0.0057 | 1.67E-20 |
| rs3780181 | G | A | -0.0445 | 0.9473 | 0.0527 | 0.0074 | 1.76E-09 |
| rs4253776 | G | A | 0.0311 | 0.8777 | 0.1223 | 0.0059 | 3.35E-08 |
| rs4530754 | A | G | 0.0275 | 0.5835 | 0.4165 | 0.0036 | 3.58E-12 |
| rs5763662 | T | C | 0.0767 | 0.9732 | 0.0268 | 0.0121 | 1.19E-08 |
| rs6016373 | G | A | -0.0349 | 0.6352 | 0.3648 | 0.0037 | 7.95E-19 |
| rs6065311 | C | T | 0.0417 | 0.4602 | 0.4602 | 0.0036 | 1.66E-30 |
| rs6511720 | T | G | -0.2209 | 0.8897 | 0.1103 | 0.0061 | 1.00E-200 |
| rs6544713 | C | T | -0.0806 | 0.6909 | 0.3091 | 0.0041 | 4.84E-83 |
| rs6603981 | T | C | 0.034 | 0.1928 | 0.1928 | 0.0044 | 3.10E-13 |
| rs6709904 | G | A | -0.055 | 0.8877 | 0.1123 | 0.0085 | 4.58E-10 |
| rs6818397 | G | T | -0.0224 | 0.5934 | 0.4066 | 0.004 | 1.68E-08 |
| rs6882076 | C | T | 0.0456 | 0.6471 | 0.3529 | 0.0038 | 3.31E-31 |
| rs6935921 | T | C | 0.0298 | 0.2684 | 0.2684 | 0.0042 | 3.42E-11 |
| rs7225700 | C | T | 0.0297 | 0.668 | 0.332 | 0.0038 | 3.56E-13 |
| rs72902576 | G | T | -0.0933 | 0.0358 | 0.0358 | 0.0133 | 9.58E-12 |
| rs7412 | T | C | -0.5898 | 0.9374 | 0.0626 | 0.0101 | 1.00E-200 |
| rs7534572 | G | C | 0.0407 | 0.2256 | 0.2256 | 0.0058 | 1.29E-11 |
| rs7551981 | T | G | 0.0472 | 0.3827 | 0.3827 | 0.0038 | 1.36E-33 |
| rs75687619 | T | G | 0.1735 | 0.9672 | 0.0328 | 0.0161 | 8.05E-24 |
| rs7640978 | T | C | -0.0392 | 0.8877 | 0.1123 | 0.0069 | 9.84E-09 |
| rs7703051 | A | C | 0.0727 | 0.3907 | 0.3907 | 0.0037 | 1.40E-77 |
| rs7832643 | T | G | 0.0339 | 0.5895 | 0.4105 | 0.0038 | 2.67E-17 |
| rs8017377 | A | G | 0.0303 | 0.4811 | 0.4811 | 0.0038 | 2.52E-15 |
| rs8103315 | A | C | 0.0558 | 0.1392 | 0.1392 | 0.0057 | 1.62E-22 |
| rs868943 | A | G | -0.0264 | 0.4085 | 0.4085 | 0.0037 | 8.44E-11 |
| rs9534262 | C | T | -0.0241 | 0.5179 | 0.4821 | 0.0036 | 4.45E-11 |
| rs964184 | C | G | -0.0855 | 0.838 | 0.162 | 0.0078 | 2.01E-26 |
| rs9875338 | A | G | -0.027 | 0.4006 | 0.4006 | 0.0037 | 2.21E-11 |
| rs9987289 | G | A | 0.0714 | 0.0746 | 0.0746 | 0.0066 | 8.53E-24 |

a The variants together explain 1.2% of the variation in Low Density Lipoprotein cholesterol(LDL) (R2 = 0.012; F (TOTAL) = 30.160).

b Increase in Low Density Lipoprotein cholesterol(LDL) in per effect allele.

c Effect Allele Frequency

d Minor Allele Frequency

Characteristics of the single nucleotide polymorphisms (SNP) used as instrumental variables for Fasting Glucosea

| SNP | Effect Allele | Other Allele | Effect (BETA)b | EAFc | MAFd | Standard Error | P-Value |
| --- | --- | --- | --- | --- | --- | --- | --- |
| rs10811661 | C | T | -0.024 | 0.199 | 0.199 | 0.0028 | 5.65E-18 |
| rs10814916 | C | A | 0.016 | 0.434 | 0.434 | 0.0022 | 2.26E-13 |
| rs10830963 | G | C | 0.078 | 0.3 | 0.3 | 0.0025 | 1.00E-200 |
| rs11195502 | T | C | -0.032 | 0.1 | 0.1 | 0.0037 | 1.97E-18 |
| rs11558471 | G | A | -0.029 | 0.252 | 0.252 | 0.0023 | 7.80E-37 |
| rs11603334 | A | G | -0.019 | 0.129 | 0.129 | 0.0028 | 1.12E-11 |
| rs11607883 | A | G | -0.021 | 0.469 | 0.469 | 0.0021 | 6.32E-24 |
| rs11619319 | G | A | 0.02 | 0.212 | 0.212 | 0.0024 | 1.33E-15 |
| rs11708067 | G | A | -0.023 | 0.226 | 0.226 | 0.0026 | 1.30E-18 |
| rs11715915 | T | C | -0.012 | 0.274 | 0.274 | 0.0022 | 4.90E-08 |
| rs1260326 | C | T | 0.029 | 0.5895 | 0.4105 | 0.0021 | 2.17E-41 |
| rs1280 | C | T | -0.026 | 0.137 | 0.137 | 0.0031 | 8.56E-18 |
| rs12888855 | A | C | -0.016 | 0.1909 | 0.1909 | 0.0025 | 5.04E-10 |
| rs16913693 | G | T | -0.043 | 0.017 | 0.017 | 0.0066 | 3.51E-11 |
| rs17168486 | T | C | 0.031 | 0.834 | 0.166 | 0.0028 | 3.17E-28 |
| rs174576 | A | C | -0.02 | 0.345 | 0.345 | 0.0022 | 1.18E-18 |
| rs17712208 | A | T | 0.051 | 0.0507 | 0.0507 | 0.0074 | 3.22E-12 |
| rs2191349 | T | G | 0.029 | 0.467 | 0.467 | 0.0021 | 1.28E-42 |
| rs2302593 | G | C | -0.014 | 0.475 | 0.475 | 0.0023 | 9.26E-10 |
| rs3829109 | A | G | -0.017 | 0.2823 | 0.2823 | 0.0027 | 1.13E-10 |
| rs4502156 | C | T | -0.022 | 0.42 | 0.42 | 0.0021 | 1.38E-25 |
| rs4869272 | T | C | 0.018 | 0.323 | 0.323 | 0.0022 | 1.02E-15 |
| rs560887 | C | T | 0.071 | 0.326 | 0.326 | 0.0025 | 1.40E-178 |
| rs6072275 | A | G | 0.016 | 0.142 | 0.142 | 0.0028 | 1.66E-08 |
| rs6113722 | A | G | -0.035 | 0.04 | 0.04 | 0.0053 | 2.49E-11 |
| rs6943153 | C | T | -0.015 | 0.279 | 0.279 | 0.0022 | 1.63E-12 |
| rs6975024 | C | T | 0.061 | 0.1759 | 0.1759 | 0.0029 | 2.88E-99 |
| rs749067 | C | T | -0.017 | 0.6133 | 0.3867 | 0.0022 | 6.12E-15 |
| rs7651090 | G | A | 0.013 | 0.296 | 0.296 | 0.0023 | 1.75E-08 |
| rs7903146 | T | C | 0.022 | 0.279 | 0.279 | 0.0024 | 2.71E-20 |
| rs882020 | T | C | 0.021 | 0.1223 | 0.1223 | 0.003 | 3.04E-12 |
| rs9368222 | A | C | 0.014 | 0.2803 | 0.2803 | 0.0023 | 1.00E-09 |
| rs983309 | G | T | -0.026 | 0.097 | 0.097 | 0.0033 | 6.29E-15 |

a The variants together explain 10.3% of the variation in Fasting Glucose (R2 = 0.103; F (TOTAL) = 160.591).

b Increase in Fasting Glucose in per effect allele.

c Effect Allele Frequency

d Minor Allele Frequency

| Characteristics of the single nucleotide polymorphisms (SNP) used as instrumental variables for Fasting Insulina |
| --- |

| SNP | Effect Allele | Other Allele | Effect (BETA)b | EAFc | MAFd | Standard Error | P-Value |
| --- | --- | --- | --- | --- | --- | --- | --- |
| rs10195252 | C | T | -0.017 | 0.4423 | 0.4423 | 0.0021 | 1.26E-16 |
| rs1260326 | C | T | 0.021 | 0.5895 | 0.4105 | 0.0021 | 2.74E-22 |
| rs17036328 | C | T | -0.021 | 0.1213 | 0.1213 | 0.003 | 3.59E-12 |
| rs2126259 | C | T | -0.024 | 0.0865 | 0.0865 | 0.0033 | 3.30E-13 |
| rs2943645 | T | C | 0.019 | 0.3757 | 0.3757 | 0.0021 | 2.26E-19 |
| rs3822072 | A | G | 0.012 | 0.5209 | 0.4791 | 0.0021 | 1.80E-08 |
| rs459193 | G | A | 0.015 | 0.7087 | 0.2913 | 0.0023 | 1.15E-10 |
| rs4846565 | A | G | -0.013 | 0.3270 | 0.327 | 0.0022 | 1.76E-09 |
| rs4865796 | A | G | 0.015 | 0.6968 | 0.3032 | 0.0022 | 2.16E-12 |
| rs6822892 | G | A | -0.014 | 0.281 | 0.281 | 0.0022 | 2.58E-10 |
| rs6912327 | C | T | -0.016 | 0.2366 | 0.2366 | 0.0029 | 2.26E-08 |
| rs731839 | A | G | -0.015 | 0.333 | 0.333 | 0.0021 | 5.13E-12 |
| rs860598 | A | G | 0.015 | 0.174 | 0.174 | 0.0027 | 1.46E-08 |
| rs974801 | G | A | 0.014 | 0.4066 | 0.4066 | 0.0021 | 3.27E-11 |

a The variants together explain 2.7% of the variation in Fasting Insulin (R2 = 0.027; F (TOTAL) = 2730.214).

b Increase in Fasting Insulin in per effect allele.

c Effect Allele Frequency

d Minor Allele Frequency

| Characteristics of the single nucleotide polymorphisms (SNP) used as instrumental variables for Homeostasis Model Assessment of Insulin Resistance (HOMA-IR)a |
| --- |

| SNP | Effect Allele | Other Allele | Effect (BETA)b | EAFc | MAFd | Standard Error | P-Value |
| --- | --- | --- | --- | --- | --- | --- | --- |
| rs1015497 | C | A | 0.021 | 0.75 | 0.25 | 0.0046 | 3.23E-06 |
| rs12759838 | T | A | -0.026 | 0.808 | 0.192 | 0.0054 | 9.46E-07 |
| rs35767 | G | A | 0.029 | 0.885 | 0.115 | 0.0054 | 7.57E-08 |
| rs588262 | C | T | 0.065 | 0.956 | 0.044 | 0.014 | 1.61E-06 |
| rs6479526 | T | C | 0.022 | 0.204 | 0.204 | 0.0048 | 4.06E-06 |
| rs7708079 | T | C | -0.042 | 0.071 | 0.071 | 0.0091 | 4.33E-06 |
| rs780094 | C | T | 0.02 | 0.606 | 0.394 | 0.0041 | 7.63E-07 |
| rs9822959 | G | T | -0.02 | 0.71 | 0.29 | 0.0042 | 1.71E-06 |

a The variants together explain 1.5% of the variation in Homeostasis Model Assessment of Insulin Resistance (HOMA-IR) (R2 = 0.015; F (TOTAL) = 71.916).

b Increase in Homeostasis Model Assessment of Insulin Resistance (HOMA-IR) in per effect allele.

c Effect Allele Frequency

d Minor Allele Frequency

| Characteristics of the single nucleotide polymorphisms (SNP) used as instrumental variables for Proinsulina |
| --- |

| SNP | Effect Allele | Other Allele | Effect (BETA)b | EAFc | MAFd | Standard Error | P-Value |
| --- | --- | --- | --- | --- | --- | --- | --- |
| rs10501320 | C | G | -0.11 | 0.292 | 0.292 | 0.008 | 2.05E-45 |
| rs11558471 | G | A | -0.057 | 0.748 | 0.252 | 0.0079 | 4.21E-13 |
| rs11603334 | A | G | 0.13 | 0.129 | 0.129 | 0.01 | 3.25E-38 |
| rs4502156 | C | T | -0.048 | 0.58 | 0.42 | 0.0072 | 3.81E-11 |
| rs4790333 | T | C | 0.04 | 0.398 | 0.398 | 0.0071 | 2.16E-08 |
| rs6101962 | G | A | -0.15 | 0.893 | 0.107 | 0.022 | 9.89E-12 |
| rs6235 | G | C | 0.058 | 0.733 | 0.267 | 0.0078 | 7.71E-14 |
| rs7903146 | T | C | 0.067 | 0.279 | 0.279 | 0.0077 | 3.48E-18 |

a The variants together explain 1.9% of the variation in Proinsulin (R2 = 0.019; F (TOTAL) = 25.844).

b Increase in Proinsulin in per effect allele.

c Effect Allele Frequency

d Minor Allele Frequency

| Characteristics of the single nucleotide polymorphisms (SNP) used as instrumental variables for Glycated Hemoglobin (HbA1c) Levela |
| --- |

| SNP | Effect Allele | Other Allele | Effect (BETA)b | EAFc | MAFd | Standard Error | P-Value |
| --- | --- | --- | --- | --- | --- | --- | --- |
| rs10244051 | G | T | 0.00850699 | 0.532636 | 0.467364 | 0.00132774 | 9.03E-11 |
| rs1046896 | T | C | 0.0321055 | 0.31185 | 0.31185 | 0.00141115 | 5.39E-109 |
| rs10830963 | G | C | 0.0184921 | 0.277011 | 0.277011 | 0.00154862 | 9.40E-34 |
| rs10965250 | A | G | -0.0113871 | 0.172701 | 0.172701 | 0.00181552 | 4.11E-10 |
| rs11619319 | G | A | 0.00825807 | 0.223665 | 0.223665 | 0.00157682 | 4.79E-08 |
| rs11708067 | G | A | -0.0135626 | 0.224525 | 0.224525 | 0.00158684 | 2.22E-17 |
| rs11920090 | A | T | -0.0137385 | 0.133447 | 0.133447 | 0.00200572 | 7.24E-14 |
| rs1545437 | T | G | 0.0129993 | 0.321392 | 0.321392 | 0.00140449 | 3.39E-22 |
| rs174546 | T | C | -0.00900495 | 0.340882 | 0.340882 | 0.00147266 | 1.05E-09 |
| rs1800562 | A | G | -0.0420554 | 0.0585985 | 0.0585985 | 0.00302475 | 1.89E-46 |
| rs2068888 | A | G | -0.00717354 | 0.456396 | 0.456396 | 0.00130559 | 2.00E-08 |
| rs2206734 | T | C | 0.0105285 | 0.180779 | 0.180779 | 0.00177043 | 4.66E-10 |
| rs267738 | G | T | -0.00966891 | 0.208191 | 0.208191 | 0.00166996 | 2.36E-09 |
| rs2732481 | G | T | -0.00937692 | 0.337539 | 0.337539 | 0.00142486 | 2.19E-11 |
| rs2748427 | G | A | 0.0280693 | 0.212859 | 0.212859 | 0.0016361 | 1.90E-70 |
| rs3184504 | C | T | 0.00741649 | 0.522389 | 0.477611 | 0.00139521 | 3.71E-08 |
| rs340874 | C | T | 0.00850781 | 0.538048 | 0.461952 | 0.0012992 | 1.94E-11 |
| rs35233100 | T | C | -0.0150887 | 0.0628318 | 0.0628318 | 0.00278076 | 1.70E-08 |
| rs35332062 | A | G | 0.0114166 | 0.123043 | 0.123043 | 0.00210719 | 3.90E-09 |
| rs35413309 | T | C | -0.0224175 | 0.0301351 | 0.0301351 | 0.00376308 | 4.03E-09 |
| rs35720761 | T | C | -0.0139796 | 0.12009 | 0.12009 | 0.00203856 | 1.42E-12 |
| rs35742417 | A | C | -0.0106321 | 0.179954 | 0.179954 | 0.00170547 | 5.79E-10 |
| rs3731620 | A | G | -0.0114755 | 0.142928 | 0.142928 | 0.00190518 | 2.65E-09 |
| rs3747481 | T | C | 0.00892355 | 0.261356 | 0.261356 | 0.00163697 | 3.30E-08 |
| rs3783347 | T | G | -0.00878921 | 0.21808 | 0.21808 | 0.00159511 | 6.38E-09 |
| rs3802177 | A | G | -0.015617 | 0.316606 | 0.316606 | 0.00143606 | 7.00E-27 |
| rs415895 | G | C | -0.0127395 | 0.661486 | 0.338514 | 0.00141612 | 2.67E-20 |
| rs4737009 | A | G | 0.0240404 | 0.242145 | 0.242145 | 0.0017248 | 2.98E-46 |
| rs5015480 | T | C | -0.00753279 | 0.418671 | 0.418671 | 0.001324 | 1.39E-08 |
| rs507666 | A | G | 0.0138563 | 0.194021 | 0.194021 | 0.00181206 | 1.37E-15 |
| rs560887 | C | T | 0.0333072 | 0.700311 | 0.299689 | 0.00149599 | 1.29E-115 |
| rs60980157 | T | C | -0.0129472 | 0.25367 | 0.25367 | 0.00160792 | 1.55E-16 |
| rs6474359 | C | T | -0.0453771 | 0.0315844 | 0.0315844 | 0.00362297 | 2.81E-37 |
| rs6494537 | T | C | 0.00800277 | 0.4399 | 0.4399 | 0.00137986 | 6.81E-09 |
| rs6882076 | C | T | 0.00754027 | 0.636564 | 0.363436 | 0.00138491 | 1.60E-08 |
| rs7072268 | C | T | -0.0197434 | 0.514984 | 0.485016 | 0.00133582 | 1.19E-50 |
| rs730497 | A | G | 0.0343486 | 0.164762 | 0.164762 | 0.00182977 | 2.75E-84 |
| rs7651090 | G | A | 0.00838841 | 0.311627 | 0.311627 | 0.0014804 | 2.64E-08 |
| rs7903146 | T | C | 0.0126934 | 0.280837 | 0.280837 | 0.00149894 | 5.12E-18 |
| rs7998202 | G | A | 0.0158435 | 0.13685 | 0.13685 | 0.00196804 | 5.18E-17 |
| rs837763 | T | C | 0.0175556 | 0.563349 | 0.436651 | 0.00143112 | 5.92E-36 |
| rs855791 | G | A | -0.0186757 | 0.566503 | 0.433497 | 0.00135793 | 8.09E-47 |
| rs857725 | G | T | 0.0229517 | 0.272844 | 0.272844 | 0.00153982 | 2.65E-54 |
| rs9376090 | C | T | -0.0219287 | 0.263238 | 0.263238 | 0.00160344 | 8.46E-44 |

a The variants together explain 7.1% of the variation in Glycated Hemoglobin (HbA1c) Level (R2 = 0.071; F (TOTAL) = 250.148).

b Increase in Glycated Hemoglobin (HbA1c) Level in per effect allele.

c Effect Allele Frequency

d Minor Allele Frequency

| Characteristics of the single nucleotide polymorphisms (SNP) used as instrumental variables for Urate Levela |
| --- |

| SNP | Effect Allele | Other Allele | Effect (BETA)b | EAFc | MAFd | Standard Error | P-Value |
| --- | --- | --- | --- | --- | --- | --- | --- |
| rs10761587 | C | T | -0.062 | 0.8837 | 0.1163 | 0.0091 | 9.58E-11 |
| rs11264341 | T | C | -0.048 | 0.5885 | 0.4115 | 0.0059 | 1.04E-14 |
| rs1165151 | G | T | 0.092 | 0.4612 | 0.4612 | 0.0054 | 4.52E-60 |
| rs1171614 | C | T | 0.074 | 0.2416 | 0.2416 | 0.0071 | 6.48E-23 |
| rs11722228 | T | C | 0.21 | 0.6541 | 0.3459 | 0.0056 | 1.00E-200 |
| rs1178977 | G | A | -0.05 | 0.8111 | 0.1889 | 0.0069 | 6.68E-12 |
| rs1260326 | C | T | -0.077 | 0.5895 | 0.4105 | 0.0055 | 1.31E-40 |
| rs1394125 | A | G | 0.043 | 0.3419 | 0.3419 | 0.0063 | 9.78E-11 |
| rs1471633 | C | A | -0.061 | 0.493 | 0.493 | 0.0054 | 1.40E-26 |
| rs17050272 | A | G | 0.037 | 0.4503 | 0.4503 | 0.0061 | 9.36E-09 |
| rs17632159 | C | G | -0.038 | 0.2952 | 0.2952 | 0.0061 | 2.00E-09 |
| rs1825043 | A | G | 0.1 | 0.9533 | 0.0467 | 0.013 | 6.67E-14 |
| rs2078267 | T | C | -0.078 | 0.5308 | 0.4692 | 0.0059 | 8.73E-36 |
| rs2231142 | T | G | 0.22 | 0.0944 | 0.0944 | 0.0091 | 4.44E-116 |
| rs2307394 | C | T | 0.035 | 0.325 | 0.325 | 0.0057 | 7.26E-09 |
| rs2941484 | T | C | 0.049 | 0.5676 | 0.4324 | 0.0055 | 3.91E-17 |
| rs3741414 | T | C | -0.071 | 0.1948 | 0.1948 | 0.007 | 9.79E-22 |
| rs642803 | T | C | -0.043 | 0.5427 | 0.4573 | 0.0054 | 4.51E-14 |
| rs653178 | T | C | -0.036 | 0.5338 | 0.4662 | 0.0054 | 2.45E-10 |
| rs6598541 | G | A | -0.044 | 0.3449 | 0.3449 | 0.0057 | 5.20E-13 |
| rs675209 | C | T | -0.063 | 0.7306 | 0.2694 | 0.0062 | 1.38E-21 |
| rs6770152 | T | G | -0.048 | 0.4135 | 0.4135 | 0.0056 | 2.66E-16 |
| rs6830367 | C | G | 0.051 | 0.1909 | 0.1909 | 0.0072 | 2.35E-11 |
| rs7193778 | T | C | -0.047 | 0.1382 | 0.1382 | 0.0079 | 2.36E-08 |
| rs7224610 | A | C | -0.038 | 0.5686 | 0.4314 | 0.0055 | 4.74E-11 |
| rs729761 | G | T | 0.046 | 0.7266 | 0.2734 | 0.0063 | 3.05E-12 |
| rs7654258 | T | C | -0.099 | 0.0845 | 0.0845 | 0.01 | 1.09E-19 |

a The variants together explain 6.1% of the variation in Urate Level (R2 = 0.061; F (TOTAL) = 263.983).

b Increase in Urate Level in per effect allele.

c Effect Allele Frequency

d Minor Allele Frequency

| Characteristics of the single nucleotide polymorphisms (SNP) used as instrumental variables for C-Reactive Protein Levela |
| --- |

| SNP | Effect Allele | Other Allele | Effect (BETA)b | EAFc | MAFd | Standard Error | P-Value |
| --- | --- | --- | --- | --- | --- | --- | --- |
| rs10240168 | G | C | -0.028684 | 0.221389 | 0.221389 | 0.004343 | 4.11E-11 |
| rs10512597 | C | T | 0.036931 | 0.817288 | 0.182712 | 0.00489 | 4.44E-14 |
| rs1051338 | G | T | 0.023881 | 0.308119 | 0.308119 | 0.003992 | 2.27E-09 |
| rs10521222 | T | C | -0.104411 | 0.04533 | 0.04533 | 0.010714 | 2.06E-22 |
| rs10778215 | A | T | -0.033242 | 0.488517 | 0.488517 | 0.003583 | 1.86E-20 |
| rs10832027 | A | G | 0.025944 | 0.668809 | 0.331191 | 0.003745 | 4.43E-12 |
| rs10925027 | C | T | -0.036035 | 0.599644 | 0.400356 | 0.00382 | 4.25E-21 |
| rs11108056 | G | C | -0.027907 | 0.42371 | 0.42371 | 0.003708 | 5.42E-14 |
| rs12202641 | T | C | -0.022804 | 0.39442 | 0.39442 | 0.003617 | 3.00E-10 |
| rs12587622 | A | G | -0.020798 | 0.500861 | 0.499139 | 0.003609 | 8.52E-09 |
| rs1260326 | C | T | -0.073462 | 0.607156 | 0.392844 | 0.003604 | 2.72E-92 |
| rs12960928 | C | T | 0.024 | 0.267003 | 0.267003 | 0.003993 | 1.91E-09 |
| rs12995480 | C | T | 0.031261 | 0.830925 | 0.169075 | 0.004855 | 1.24E-10 |
| rs13233571 | T | C | -0.056895 | 0.119609 | 0.119609 | 0.005476 | 2.95E-25 |
| rs13409371 | A | G | 0.048232 | 0.429854 | 0.429854 | 0.003847 | 5.07E-36 |
| rs1441169 | G | A | -0.024926 | 0.532568 | 0.467432 | 0.003725 | 2.27E-11 |
| rs1490384 | T | C | -0.024816 | 0.512283 | 0.487717 | 0.003545 | 2.65E-12 |
| rs1509394 | T | C | 0.025685 | 0.542959 | 0.457041 | 0.004147 | 6.05E-10 |
| rs1558902 | A | T | 0.033926 | 0.405653 | 0.405653 | 0.003701 | 5.20E-20 |
| rs1582763 | A | G | -0.022107 | 0.37181 | 0.37181 | 0.0037 | 2.37E-09 |
| rs17658229 | C | T | 0.055568 | 0.045881 | 0.045881 | 0.009522 | 5.50E-09 |
| rs178810 | T | C | 0.02001 | 0.562924 | 0.437076 | 0.003606 | 2.95E-08 |
| rs1800961 | T | C | -0.1115 | 0.033816 | 0.033816 | 0.011267 | 4.63E-23 |
| rs1805096 | A | G | -0.104381 | 0.38625 | 0.38625 | 0.003614 | 2.17E-183 |
| rs1880241 | G | A | -0.027537 | 0.48295 | 0.48295 | 0.003687 | 8.41E-14 |
| rs2064009 | T | C | 0.027111 | 0.581445 | 0.418555 | 0.003549 | 2.28E-14 |
| rs2239222 | G | A | 0.035484 | 0.363541 | 0.363541 | 0.003901 | 9.87E-20 |
| rs2293476 | C | G | 0.030262 | 0.225941 | 0.225941 | 0.004225 | 8.27E-13 |
| rs2315008 | G | T | 0.023467 | 0.687731 | 0.312269 | 0.003777 | 5.36E-10 |
| rs2352975 | C | T | 0.024897 | 0.303573 | 0.303573 | 0.004026 | 6.43E-10 |
| rs2710804 | C | T | 0.021262 | 0.367409 | 0.367409 | 0.003737 | 1.30E-08 |
| rs2794520 | T | C | -0.182186 | 0.333842 | 0.333842 | 0.003712 | 1.00E-200 |
| rs2836878 | A | G | -0.042902 | 0.27418 | 0.27418 | 0.004079 | 7.71E-26 |
| rs2852151 | A | G | 0.024735 | 0.404527 | 0.404527 | 0.003655 | 1.36E-11 |
| rs2891677 | T | C | 0.019859 | 0.538958 | 0.461042 | 0.003511 | 1.59E-08 |
| rs3122633 | C | T | 0.027479 | 0.301705 | 0.301705 | 0.00389 | 1.68E-12 |
| rs3134899 | T | C | 0.023329 | 0.767055 | 0.232945 | 0.004274 | 4.93E-08 |
| rs340005 | A | G | 0.030007 | 0.620695 | 0.379305 | 0.003736 | 1.01E-15 |
| rs387976 | C | A | 0.025507 | 0.331946 | 0.331946 | 0.003946 | 1.05E-10 |
| rs4092465 | G | A | 0.027483 | 0.650698 | 0.349302 | 0.004364 | 3.11E-10 |
| rs4129267 | T | C | -0.087519 | 0.385524 | 0.385524 | 0.003612 | 1.20E-129 |
| rs4246598 | A | C | 0.022063 | 0.46258 | 0.46258 | 0.003547 | 5.11E-10 |
| rs4420638 | G | A | -0.229459 | 0.17962 | 0.17962 | 0.006122 | 1.00E-200 |
| rs4655802 | A | G | -0.025012 | 0.614793 | 0.385207 | 0.00416 | 1.88E-09 |
| rs4656849 | G | A | 0.057656 | 0.621343 | 0.378657 | 0.003723 | 4.91E-54 |
| rs469772 | T | C | -0.031327 | 0.193541 | 0.193541 | 0.004542 | 5.54E-12 |
| rs4767920 | A | G | -0.038519 | 0.842127 | 0.157873 | 0.0049 | 4.00E-15 |
| rs4841132 | G | A | 0.065095 | 0.909023 | 0.090977 | 0.006243 | 2.00E-25 |
| rs6001193 | G | A | -0.027809 | 0.35065 | 0.35065 | 0.003706 | 6.53E-14 |
| rs644234 | G | T | 0.022597 | 0.369203 | 0.369203 | 0.003708 | 1.13E-09 |
| rs6485751 | C | G | -0.03089 | 0.218471 | 0.218471 | 0.004359 | 1.43E-12 |
| rs6601302 | G | T | -0.030518 | 0.736931 | 0.263069 | 0.004478 | 9.80E-12 |
| rs6672627 | A | C | -0.037135 | 0.146148 | 0.146148 | 0.005083 | 2.89E-13 |
| rs7121935 | A | G | -0.021853 | 0.376337 | 0.376337 | 0.00374 | 5.28E-09 |
| rs7310409 | G | A | 0.137075 | 0.607808 | 0.392192 | 0.003706 | 1.00E-200 |
| rs9271608 | G | A | 0.042021 | 0.215335 | 0.215335 | 0.004954 | 2.33E-17 |
| rs9284725 | A | C | -0.02731 | 0.761212 | 0.238788 | 0.00419 | 7.34E-11 |

a The variants together explain 6.5% of the variation in C-Reactive Protein Level (R2 = 0.065; F (TOTAL) = 233.024).

b Increase in C-Reactive Protein Level in per effect allele.

c Effect Allele Frequency

d Minor Allele Frequency

| Characteristics of the single nucleotide polymorphisms (SNP) used as instrumental variables for Serum Albumin Levela   | SNP | Effect Allele | Other Allele | Effect (BETA)b | EAFc | MAFd | Standard Error | P-Value | | --- | --- | --- | --- | --- | --- | --- | --- | | rs10042492 | T | C | -0.0143 | 0.46041 | 0.46041 | 0.0021 | 5.05E-12 | | rs10143115 | A | G | -0.0124 | 0.534949 | 0.465051 | 0.0021 | 2.76E-09 | | rs10181777 | A | G | 0.016 | 0.223451 | 0.223451 | 0.0025 | 1.56E-10 | | rs10236582 | C | T | -0.0222 | 0.27836 | 0.27836 | 0.0028 | 9.93E-16 | | rs1030098 | C | T | 0.0195 | 0.293759 | 0.293759 | 0.0024 | 5.30E-16 | | rs10419198 | T | C | -0.0637 | 0.232895 | 0.232895 | 0.0024 | 1.44E-149 | | rs10422861 | T | C | -0.0249 | 0.612171 | 0.387829 | 0.0021 | 3.68E-31 | | rs10456852 | T | C | 0.0263 | 0.12956 | 0.12956 | 0.0037 | 1.12E-12 | | rs1050976 | T | C | -0.0137 | 0.475235 | 0.475235 | 0.0021 | 8.04E-11 | | rs1055582 | T | C | -0.0126 | 0.56286 | 0.43714 | 0.0021 | 2.75E-09 | | rs10788184 | A | C | 0.0136 | 0.270783 | 0.270783 | 0.0023 | 6.39E-09 | | rs10807986 | C | T | 0.0143 | 0.605107 | 0.394893 | 0.0021 | 1.74E-11 | | rs10868089 | C | T | -0.0188 | 0.81028 | 0.18972 | 0.0031 | 2.56E-09 | | rs10873301 | T | G | -0.0126 | 0.363158 | 0.363158 | 0.0022 | 8.08E-09 | | rs10971911 | C | T | -0.0125 | 0.306869 | 0.306869 | 0.0023 | 3.98E-08 | | rs11012732 | G | A | -0.0233 | 0.240451 | 0.240451 | 0.0026 | 4.00E-19 | | rs11057273 | C | T | -0.0242 | 0.860283 | 0.139717 | 0.003 | 9.21E-16 | | rs11071940 | C | A | 0.0157 | 0.30854 | 0.30854 | 0.0023 | 1.06E-11 | | rs11078597 | C | T | 0.0548 | 0.190328 | 0.190328 | 0.0026 | 2.53E-97 | | rs11080055 | C | A | -0.0123 | 0.58634 | 0.41366 | 0.0022 | 1.07E-08 | | rs11218720 | G | A | 0.0147 | 0.386792 | 0.386792 | 0.0021 | 4.91E-12 | | rs1122326 | C | A | -0.0293 | 0.212767 | 0.212767 | 0.0025 | 4.38E-31 | | rs11236524 | C | T | 0.0191 | 0.156514 | 0.156514 | 0.0029 | 7.34E-11 | | rs113177823 | A | G | 0.0428 | 0.054374 | 0.054374 | 0.0055 | 6.58E-15 | | rs113536938 | C | T | 0.0857 | 0.0092156 | 0.0092156 | 0.0129 | 3.61E-11 | | rs114113354 | G | A | 0.0167 | 0.306879 | 0.306879 | 0.0023 | 2.58E-13 | | rs11589479 | A | G | 0.0452 | 0.119303 | 0.119303 | 0.0033 | 1.81E-42 | | rs11590084 | T | C | 0.022 | 0.19341 | 0.19341 | 0.0032 | 3.05E-12 | | rs115946508 | A | C | 0.0571 | 0.11124 | 0.11124 | 0.0039 | 1.21E-47 | | rs11609805 | A | G | -0.0224 | 0.19927 | 0.19927 | 0.0026 | 2.02E-17 | | rs11621792 | T | C | 0.0174 | 0.344239 | 0.344239 | 0.0024 | 2.77E-13 | | rs11656541 | C | G | 0.0269 | 0.477918 | 0.477918 | 0.0025 | 4.53E-26 | | rs11724167 | G | T | 0.0225 | 0.1794 | 0.1794 | 0.0027 | 6.89E-17 | | rs11769886 | A | G | -0.0171 | 0.150466 | 0.150466 | 0.003 | 9.27E-09 | | rs117804693 | T | C | -0.0238 | 0.213978 | 0.213978 | 0.0027 | 9.65E-19 | | rs11881404 | G | A | -0.02 | 0.658121 | 0.341879 | 0.0022 | 5.98E-20 | | rs11895352 | T | C | -0.012 | 0.436905 | 0.436905 | 0.0021 | 1.25E-08 | | rs11928797 | A | C | 0.028 | 0.0853208 | 0.0853208 | 0.0038 | 2.17E-13 | | rs11939652 | A | T | -0.0178 | 0.30607 | 0.30607 | 0.0027 | 3.12E-11 | | rs12006266 | C | T | -0.0182 | 0.377975 | 0.377975 | 0.0021 | 1.29E-17 | | rs12044156 | C | G | 0.0216 | 0.56342 | 0.43658 | 0.0025 | 2.59E-18 | | rs12130672 | G | A | 0.0218 | 0.36948 | 0.36948 | 0.0025 | 1.26E-17 | | rs12201597 | A | C | -0.0169 | 0.162933 | 0.162933 | 0.0028 | 3.10E-09 | | rs12280075 | G | T | -0.0123 | 0.350122 | 0.350122 | 0.0022 | 1.70E-08 | | rs1229492 | C | T | -0.0159 | 0.758602 | 0.241398 | 0.0024 | 6.68E-11 | | rs12445401 | G | A | 0.0294 | 0.18877 | 0.18877 | 0.0031 | 9.13E-21 | | rs12453376 | G | A | -0.0152 | 0.201421 | 0.201421 | 0.0026 | 4.82E-09 | | rs125124 | G | C | -0.0179 | 0.32656 | 0.32656 | 0.0022 | 4.46E-16 | | rs12575636 | G | T | 0.0168 | 0.157524 | 0.157524 | 0.0029 | 5.00E-09 | | rs1260326 | C | T | -0.058 | 0.561394 | 0.438606 | 0.0021 | 1.97E-168 | | rs12670403 | A | C | 0.0126 | 0.451805 | 0.451805 | 0.0021 | 2.38E-09 | | rs12710562 | G | A | 0.0238 | 0.199996 | 0.199996 | 0.0026 | 4.78E-20 | | rs12729418 | A | G | 0.0156 | 0.663035 | 0.336965 | 0.0022 | 9.32E-13 | | rs12768143 | T | A | -0.0125 | 0.30922 | 0.30922 | 0.0022 | 2.80E-08 | | rs12881869 | T | C | -0.0492 | 0.052595 | 0.052595 | 0.0047 | 2.55E-25 | | rs13104436 | T | C | 0.0213 | 0.870675 | 0.129325 | 0.0032 | 2.37E-11 | | rs13107325 | T | C | -0.0559 | 0.074885 | 0.074885 | 0.0047 | 7.67E-33 | | rs13108218 | G | A | -0.0412 | 0.572716 | 0.427284 | 0.0021 | 3.24E-84 | | rs13242809 | A | T | 0.0152 | 0.400329 | 0.400329 | 0.0023 | 5.10E-11 | | rs13275062 | G | C | 0.0148 | 0.36492 | 0.36492 | 0.0026 | 8.49E-09 | | rs1330539 | C | T | 0.0129 | 0.548394 | 0.451606 | 0.0021 | 8.85E-10 | | rs1331309 | G | T | 0.0209 | 0.26152 | 0.26152 | 0.0028 | 1.23E-13 | | rs13389219 | T | C | -0.0282 | 0.306711 | 0.306711 | 0.0024 | 1.06E-32 | | rs13426120 | T | A | 0.0156 | 0.2965 | 0.2965 | 0.0027 | 8.03E-09 | | rs138833981 | G | C | -0.0858 | 0.016171 | 0.016171 | 0.0099 | 4.17E-18 | | rs139278099 | T | C | 0.0627 | 0.041636 | 0.041636 | 0.0062 | 4.43E-24 | | rs139657540 | T | A | 0.0184 | 0.44424 | 0.44424 | 0.0025 | 1.44E-13 | | rs145441283 | G | A | -0.0795 | 0.0087862 | 0.0087862 | 0.0142 | 1.90E-08 | | rs147233090 | T | C | 0.1534 | 0.024316 | 0.024316 | 0.008 | 3.55E-81 | | rs149092986 | C | T | -0.0549 | 0.023997 | 0.023997 | 0.0084 | 5.06E-11 | | rs149222436 | T | C | 0.0252 | 0.0767641 | 0.0767641 | 0.004 | 4.25E-10 | | rs1497406 | G | A | 0.0227 | 0.642713 | 0.357287 | 0.0022 | 7.09E-25 | | rs1500187 | G | A | -0.0209 | 0.52091 | 0.47909 | 0.0021 | 5.72E-23 | | rs1547380 | T | C | 0.0125 | 0.360125 | 0.360125 | 0.0022 | 8.29E-09 | | rs16950612 | G | A | -0.0254 | 0.10959 | 0.10959 | 0.0039 | 1.10E-10 | | rs17023530 | A | T | -0.0339 | 0.0463049 | 0.0463049 | 0.0049 | 5.30E-12 | | rs17580 | A | T | 0.0948 | 0.048858 | 0.048858 | 0.0057 | 7.37E-62 | | rs17732878 | C | T | 0.0267 | 0.168679 | 0.168679 | 0.0028 | 4.18E-21 | | rs1784559 | T | A | -0.0231 | 0.548716 | 0.451284 | 0.0022 | 1.84E-25 | | rs1791936 | A | G | 0.0217 | 0.503455 | 0.496545 | 0.0022 | 1.13E-22 | | rs1801282 | G | C | -0.0481 | 0.0955205 | 0.0955205 | 0.0036 | 1.65E-41 | | rs1862719 | G | A | 0.0133 | 0.663379 | 0.336621 | 0.0023 | 1.27E-08 | | rs1922991 | A | T | 0.0191 | 0.82911 | 0.17089 | 0.0033 | 9.80E-09 | | rs198426 | T | C | -0.0155 | 0.251574 | 0.251574 | 0.0025 | 8.60E-10 | | rs2017932 | A | C | 0.0206 | 0.185663 | 0.185663 | 0.0027 | 6.32E-14 | | rs2065703 | T | C | 0.0179 | 0.123327 | 0.123327 | 0.0032 | 3.36E-08 | | rs2096199 | A | G | -0.0191 | 0.201872 | 0.201872 | 0.0026 | 8.38E-14 | | rs2140558 | T | A | -0.017 | 0.710296 | 0.289704 | 0.0023 | 1.39E-13 | | rs2169387 | G | A | 0.0583 | 0.924335 | 0.075665 | 0.004 | 8.97E-48 | | rs2227827 | T | C | -0.0512 | 0.047899 | 0.047899 | 0.0058 | 5.96E-19 | | rs2267867 | G | A | -0.0153 | 0.280967 | 0.280967 | 0.0023 | 5.93E-11 | | rs234051 | G | A | 0.0131 | 0.721206 | 0.278794 | 0.0023 | 9.84E-09 | | rs2396185 | C | A | 0.02 | 0.20443 | 0.20443 | 0.0032 | 3.55E-10 | | rs2516486 | G | A | -0.0215 | 0.13367 | 0.13367 | 0.003 | 1.15E-12 | | rs2530784 | A | T | -0.0146 | 0.78216 | 0.21784 | 0.0025 | 5.99E-09 | | rs2531995 | T | C | -0.013 | 0.542123 | 0.457877 | 0.0021 | 1.19E-09 | | rs2710804 | C | T | -0.0148 | 0.323329 | 0.323329 | 0.0023 | 4.91E-11 | | rs2723553 | C | T | 0.023 | 0.55759 | 0.44241 | 0.0021 | 9.95E-28 | | rs2785172 | A | G | -0.0143 | 0.630971 | 0.369029 | 0.0022 | 3.17E-11 | | rs28687959 | T | C | 0.0153 | 0.530487 | 0.469513 | 0.0021 | 1.56E-13 | | rs28752871 | T | G | -0.0457 | 0.0655148 | 0.0655148 | 0.0042 | 1.24E-27 | | rs28929474 | T | C | 0.2651 | 0.020227 | 0.020227 | 0.0087 | 1.00E-200 | | rs2923096 | G | T | 0.0161 | 0.309287 | 0.309287 | 0.0024 | 3.33E-11 | | rs2929155 | T | C | -0.0151 | 0.736178 | 0.263822 | 0.0024 | 1.75E-10 | | rs2933243 | A | G | 0.0347 | 0.18299 | 0.18299 | 0.0032 | 9.28E-28 | | rs2954017 | C | T | -0.0199 | 0.531941 | 0.468059 | 0.0021 | 6.16E-22 | | rs2972136 | G | A | 0.0214 | 0.64633 | 0.35367 | 0.0026 | 9.85E-17 | | rs307810 | A | T | -0.014 | 0.35865 | 0.35865 | 0.0023 | 1.57E-09 | | rs333947 | A | G | -0.0218 | 0.187769 | 0.187769 | 0.0027 | 9.33E-16 | | rs339969 | A | C | 0.0211 | 0.695669 | 0.304331 | 0.0024 | 3.07E-19 | | rs34363898 | T | C | -0.0285 | 0.18325 | 0.18325 | 0.0032 | 5.65E-19 | | rs34562254 | A | G | -0.035 | 0.171919 | 0.171919 | 0.0028 | 5.06E-35 | | rs34931250 | T | C | 0.0334 | 0.061215 | 0.061215 | 0.0051 | 7.65E-11 | | rs35131137 | C | T | -0.0156 | 0.183805 | 0.183805 | 0.0028 | 3.17E-08 | | rs35676551 | A | C | -0.0379 | 0.058465 | 0.058465 | 0.0055 | 7.90E-12 | | rs373342471 | T | C | -0.0192 | 0.60823 | 0.39177 | 0.0026 | 1.75E-13 | | rs3744274 | A | C | -0.0188 | 0.729217 | 0.270783 | 0.0024 | 1.34E-14 | | rs3844291 | C | A | 0.0132 | 0.360559 | 0.360559 | 0.0022 | 1.09E-09 | | rs4073090 | G | A | 0.0131 | 0.410189 | 0.410189 | 0.0021 | 4.84E-10 | | rs4499445 | T | G | -0.0177 | 0.611959 | 0.388041 | 0.0021 | 1.28E-16 | | rs4500811 | C | G | 0.0131 | 0.275229 | 0.275229 | 0.0023 | 2.22E-08 | | rs4506565 | T | A | 0.0156 | 0.238082 | 0.238082 | 0.0025 | 8.72E-10 | | rs45512696 | T | C | 0.0774 | 0.134506 | 0.134506 | 0.0031 | 6.56E-136 | | rs45609236 | C | T | 0.0123 | 0.684496 | 0.315504 | 0.0022 | 4.39E-08 | | rs459193 | G | A | 0.019 | 0.670469 | 0.329531 | 0.0023 | 3.44E-16 | | rs4595905 | A | T | -0.0251 | 0.35595 | 0.35595 | 0.0026 | 1.60E-22 | | rs4680338 | G | C | 0.0182 | 0.454175 | 0.454175 | 0.0021 | 1.74E-17 | | rs4691382 | G | A | -0.0199 | 0.2436 | 0.2436 | 0.0029 | 4.26E-12 | | rs4704045 | G | A | -0.0365 | 0.512988 | 0.487012 | 0.0021 | 1.02E-69 | | rs473919 | G | C | -0.0144 | 0.247426 | 0.247426 | 0.0024 | 4.33E-09 | | rs4779872 | C | A | -0.0165 | 0.24362 | 0.24362 | 0.0029 | 1.68E-08 | | rs4802873 | C | T | -0.0124 | 0.414164 | 0.414164 | 0.0021 | 3.05E-09 | | rs4833945 | C | T | 0.0213 | 0.0913072 | 0.0913072 | 0.0037 | 5.48E-09 | | rs4921536 | C | A | 0.013 | 0.491728 | 0.491728 | 0.0023 | 2.08E-08 | | rs4948377 | G | A | -0.0138 | 0.335696 | 0.335696 | 0.0022 | 3.03E-10 | | rs4964343 | T | C | 0.0141 | 0.535087 | 0.464913 | 0.0021 | 2.82E-11 | | rs535590 | G | A | -0.0122 | 0.633641 | 0.366359 | 0.0022 | 2.15E-08 | | rs55722786 | T | G | 0.0282 | 0.207107 | 0.207107 | 0.0027 | 7.59E-25 | | rs55747707 | A | G | -0.0276 | 0.176026 | 0.176026 | 0.0027 | 8.44E-24 | | rs55772354 | A | G | -0.1187 | 0.020327 | 0.020327 | 0.0087 | 3.89E-42 | | rs55797357 | T | C | 0.0215 | 0.0995556 | 0.0995556 | 0.0035 | 7.91E-10 | | rs55846720 | A | G | -0.0128 | 0.513993 | 0.486007 | 0.0021 | 9.06E-10 | | rs559350 | C | T | 0.0267 | 0.22897 | 0.22897 | 0.0029 | 9.18E-20 | | rs56094005 | G | A | -0.0465 | 0.043798 | 0.043798 | 0.006 | 1.08E-14 | | rs56188865 | C | T | 0.0132 | 0.378275 | 0.378275 | 0.0021 | 6.30E-10 | | rs58397833 | G | A | 0.0157 | 0.39622 | 0.39622 | 0.0022 | 8.67E-13 | | rs58579887 | C | T | 0.0159 | 0.346424 | 0.346424 | 0.0022 | 8.02E-13 | | rs59104589 | T | C | -0.0193 | 0.39054 | 0.39054 | 0.0021 | 9.03E-20 | | rs6031847 | T | C | -0.0207 | 0.229141 | 0.229141 | 0.0025 | 7.88E-17 | | rs611917 | G | A | -0.0166 | 0.24959 | 0.24959 | 0.0025 | 2.67E-11 | | rs61781392 | A | C | -0.0253 | 0.198173 | 0.198173 | 0.0026 | 2.72E-22 | | rs61817641 | T | C | -0.0182 | 0.26915 | 0.26915 | 0.0028 | 6.01E-11 | | rs61983272 | C | G | -0.0329 | 0.32461 | 0.32461 | 0.0028 | 7.15E-31 | | rs62235071 | T | C | -0.0394 | 0.0484093 | 0.0484093 | 0.0049 | 1.69E-15 | | rs62621812 | A | G | 0.0539 | 0.020355 | 0.020355 | 0.009 | 1.95E-09 | | rs6456349 | A | G | 0.013 | 0.654912 | 0.345088 | 0.0022 | 2.69E-09 | | rs6486122 | T | C | 0.0133 | 0.582337 | 0.417663 | 0.0022 | 2.44E-09 | | rs667172 | A | G | 0.0173 | 0.426704 | 0.426704 | 0.0024 | 1.69E-13 | | rs6693993 | C | G | 0.0205 | 0.515465 | 0.484535 | 0.0021 | 3.56E-23 | | rs6734238 | G | A | -0.0154 | 0.305613 | 0.305613 | 0.0024 | 1.58E-10 | | rs6793835 | A | G | 0.0164 | 0.26438 | 0.26438 | 0.0028 | 4.69E-09 | | rs6840938 | A | G | -0.019 | 0.362684 | 0.362684 | 0.0022 | 7.11E-18 | | rs6860245 | C | G | -0.0174 | 0.264745 | 0.264745 | 0.0023 | 1.13E-13 | | rs689049 | C | T | 0.0179 | 0.679589 | 0.320411 | 0.0024 | 6.61E-14 | | rs6897617 | A | G | 0.0154 | 0.236559 | 0.236559 | 0.0025 | 6.94E-10 | | rs6912315 | T | C | 0.0313 | 0.052932 | 0.052932 | 0.0055 | 1.16E-08 | | rs6965245 | T | C | -0.0126 | 0.360406 | 0.360406 | 0.0022 | 9.80E-09 | | rs702773 | A | C | -0.0159 | 0.74476 | 0.25524 | 0.0028 | 1.92E-08 | | rs7073746 | G | A | -0.0185 | 0.47751 | 0.47751 | 0.0021 | 2.94E-19 | | rs71624119 | A | G | 0.0202 | 0.181141 | 0.181141 | 0.0028 | 7.48E-13 | | rs7200543 | G | A | 0.0147 | 0.336525 | 0.336525 | 0.0022 | 2.05E-11 | | rs72631343 | G | C | 0.0148 | 0.227573 | 0.227573 | 0.0027 | 2.94E-08 | | rs72697295 | C | G | 0.032 | 0.17997 | 0.17997 | 0.0032 | 4.15E-23 | | rs72793380 | A | C | 0.0225 | 0.10516 | 0.10516 | 0.004 | 2.47E-08 | | rs72959041 | A | G | 0.0513 | 0.050215 | 0.050215 | 0.0057 | 2.92E-19 | | rs73038384 | T | C | -0.0521 | 0.031599 | 0.031599 | 0.007 | 1.17E-13 | | rs7308029 | A | C | -0.0167 | 0.324588 | 0.324588 | 0.0023 | 2.13E-13 | | rs73145513 | T | C | 0.0272 | 0.068707 | 0.068707 | 0.0049 | 2.41E-08 | | rs73263719 | A | G | 0.0156 | 0.172348 | 0.172348 | 0.0029 | 4.87E-08 | | rs73400959 | A | G | -0.0283 | 0.0614042 | 0.0614042 | 0.0044 | 1.02E-10 | | rs73537429 | T | G | 0.0198 | 0.14328 | 0.14328 | 0.0035 | 1.90E-08 | | rs7366884 | C | T | 0.018 | 0.396186 | 0.396186 | 0.0024 | 4.96E-14 | | rs7435318 | A | G | 0.0163 | 0.740405 | 0.259595 | 0.0025 | 1.45E-10 | | rs744061 | A | T | 0.013 | 0.483474 | 0.483474 | 0.0022 | 6.55E-09 | | rs74538877 | C | G | 0.0311 | 0.056099 | 0.056099 | 0.0055 | 1.51E-08 | | rs74613454 | T | G | -0.0236 | 0.10526 | 0.10526 | 0.004 | 4.72E-09 | | rs74780677 | G | A | 0.093 | 0.01564 | 0.01564 | 0.0101 | 3.18E-20 | | rs75565243 | A | G | -0.0458 | 0.149183 | 0.149183 | 0.0053 | 7.96E-18 | | rs7647957 | G | A | 0.0154 | 0.661376 | 0.338624 | 0.0025 | 8.73E-10 | | rs76895963 | G | T | -0.0712 | 0.021056 | 0.021056 | 0.0094 | 4.78E-14 | | rs771462 | A | T | 0.0144 | 0.225794 | 0.225794 | 0.0025 | 6.24E-09 | | rs7717955 | T | C | 0.0146 | 0.253381 | 0.253381 | 0.0024 | 7.64E-10 | | rs77542162 | G | A | -0.1935 | 0.022953 | 0.022953 | 0.0082 | 1.40E-122 | | rs77777887 | T | A | 0.0271 | 0.0637133 | 0.0637133 | 0.0042 | 1.41E-10 | | rs77849807 | G | A | 0.1138 | 0.015709 | 0.015709 | 0.0099 | 1.30E-30 | | rs78444263 | T | C | -0.0352 | 0.071231 | 0.071231 | 0.0048 | 2.11E-13 | | rs7925299 | C | G | 0.0247 | 0.67717 | 0.32283 | 0.0026 | 5.85E-21 | | rs79687284 | C | G | 0.0486 | 0.034939 | 0.034939 | 0.0067 | 4.15E-13 | | rs8041057 | T | C | -0.0188 | 0.600791 | 0.399209 | 0.0023 | 1.16E-16 | | rs8069059 | C | T | -0.0153 | 0.72907 | 0.27093 | 0.0028 | 3.99E-08 | | rs8176693 | T | C | 0.0275 | 0.0930456 | 0.0930456 | 0.0036 | 9.08E-15 | | rs872926 | A | G | -0.0346 | 0.178143 | 0.178143 | 0.0027 | 1.08E-36 | | rs9457991 | C | T | -0.0242 | 0.119473 | 0.119473 | 0.0033 | 2.55E-13 | | rs9562209 | T | C | 0.0156 | 0.175965 | 0.175965 | 0.0027 | 7.32E-09 | | rs9616371 | A | G | -0.0231 | 0.100339 | 0.100339 | 0.0035 | 2.25E-11 | | rs967546 | A | G | -0.0127 | 0.274789 | 0.274789 | 0.0023 | 3.82E-08 | | rs9835 | G | A | 0.0131 | 0.390627 | 0.390627 | 0.0021 | 7.67E-10 | | rs9972653 | T | G | -0.0133 | 0.344198 | 0.344198 | 0.0022 | 1.99E-09 | | rs9976946 | T | C | 0.039 | 0.962177 | 0.037823 | 0.0064 | 1.47E-09 | |
| --- | --- | --- | --- | --- | --- | --- | --- | --- | --- | --- | --- | --- | --- | --- | --- | --- | --- | --- | --- | --- | --- | --- | --- | --- | --- | --- | --- | --- | --- | --- | --- | --- | --- | --- | --- | --- | --- | --- | --- | --- | --- | --- | --- | --- | --- | --- | --- | --- | --- | --- | --- | --- | --- | --- | --- | --- | --- | --- | --- | --- | --- | --- | --- | --- | --- | --- | --- | --- | --- | --- | --- | --- | --- | --- | --- | --- | --- | --- | --- | --- | --- | --- | --- | --- | --- | --- | --- | --- | --- | --- | --- | --- | --- | --- | --- | --- | --- | --- | --- | --- | --- | --- | --- | --- | --- | --- | --- | --- | --- | --- | --- | --- | --- | --- | --- | --- | --- | --- | --- | --- | --- | --- | --- | --- | --- | --- | --- | --- | --- | --- | --- | --- | --- | --- | --- | --- | --- | --- | --- | --- | --- | --- | --- | --- | --- | --- | --- | --- | --- | --- | --- | --- | --- | --- | --- | --- | --- | --- | --- | --- | --- | --- | --- | --- | --- | --- | --- | --- | --- | --- | --- | --- | --- | --- | --- | --- | --- | --- | --- | --- | --- | --- | --- | --- | --- | --- | --- | --- | --- | --- | --- | --- | --- | --- | --- | --- | --- | --- | --- | --- | --- | --- | --- | --- | --- | --- | --- | --- | --- | --- | --- | --- | --- | --- | --- | --- | --- | --- | --- | --- | --- | --- | --- | --- | --- | --- | --- | --- | --- | --- | --- | --- | --- | --- | --- | --- | --- | --- | --- | --- | --- | --- | --- | --- | --- | --- | --- | --- | --- | --- | --- | --- | --- | --- | --- | --- | --- | --- | --- | --- | --- | --- | --- | --- | --- | --- | --- | --- | --- | --- | --- | --- | --- | --- | --- | --- | --- | --- | --- | --- | --- | --- | --- | --- | --- | --- | --- | --- | --- | --- | --- | --- | --- | --- | --- | --- | --- | --- | --- | --- | --- | --- | --- | --- | --- | --- | --- | --- | --- | --- | --- | --- | --- | --- | --- | --- | --- | --- | --- | --- | --- | --- | --- | --- | --- | --- | --- | --- | --- | --- | --- | --- | --- | --- | --- | --- | --- | --- | --- | --- | --- | --- | --- | --- | --- | --- | --- | --- | --- | --- | --- | --- | --- | --- | --- | --- | --- | --- | --- | --- | --- | --- | --- | --- | --- | --- | --- | --- | --- | --- | --- | --- | --- | --- | --- | --- | --- | --- | --- | --- | --- | --- | --- | --- | --- | --- | --- | --- | --- | --- | --- | --- | --- | --- | --- | --- | --- | --- | --- | --- | --- | --- | --- | --- | --- | --- | --- | --- | --- | --- | --- | --- | --- | --- | --- | --- | --- | --- | --- | --- | --- | --- | --- | --- | --- | --- | --- | --- | --- | --- | --- | --- | --- | --- | --- | --- | --- | --- | --- | --- | --- | --- | --- | --- | --- | --- | --- | --- | --- | --- | --- | --- | --- | --- | --- | --- | --- | --- | --- | --- | --- | --- | --- | --- | --- | --- | --- | --- | --- | --- | --- | --- | --- | --- | --- | --- | --- | --- | --- | --- | --- | --- | --- | --- | --- | --- | --- | --- | --- | --- | --- | --- | --- | --- | --- | --- | --- | --- | --- | --- | --- | --- | --- | --- | --- | --- | --- | --- | --- | --- | --- | --- | --- | --- | --- | --- | --- | --- | --- | --- | --- | --- | --- | --- | --- | --- | --- | --- | --- | --- | --- | --- | --- | --- | --- | --- | --- | --- | --- | --- | --- | --- | --- | --- | --- | --- | --- | --- | --- | --- | --- | --- | --- | --- | --- | --- | --- | --- | --- | --- | --- | --- | --- | --- | --- | --- | --- | --- | --- | --- | --- | --- | --- | --- | --- | --- | --- | --- | --- | --- | --- | --- | --- | --- | --- | --- | --- | --- | --- | --- | --- | --- | --- | --- | --- | --- | --- | --- | --- | --- | --- | --- | --- | --- | --- | --- | --- | --- | --- | --- | --- | --- | --- | --- | --- | --- | --- | --- | --- | --- | --- | --- | --- | --- | --- | --- | --- | --- | --- | --- | --- | --- | --- | --- | --- | --- | --- | --- | --- | --- | --- | --- | --- | --- | --- | --- | --- | --- | --- | --- | --- | --- | --- | --- | --- | --- | --- | --- | --- | --- | --- | --- | --- | --- | --- | --- | --- | --- | --- | --- | --- | --- | --- | --- | --- | --- | --- | --- | --- | --- | --- | --- | --- | --- | --- | --- | --- | --- | --- | --- | --- | --- | --- | --- | --- | --- | --- | --- | --- | --- | --- | --- | --- | --- | --- | --- | --- | --- | --- | --- | --- | --- | --- | --- | --- | --- | --- | --- | --- | --- | --- | --- | --- | --- | --- | --- | --- | --- | --- | --- | --- | --- | --- | --- | --- | --- | --- | --- | --- | --- | --- | --- | --- | --- | --- | --- | --- | --- | --- | --- | --- | --- | --- | --- | --- | --- | --- | --- | --- | --- | --- | --- | --- | --- | --- | --- | --- | --- | --- | --- | --- | --- | --- | --- | --- | --- | --- | --- | --- | --- | --- | --- | --- | --- | --- | --- | --- | --- | --- | --- | --- | --- | --- | --- | --- | --- | --- | --- | --- | --- | --- | --- | --- | --- | --- | --- | --- | --- | --- | --- | --- | --- | --- | --- | --- | --- | --- | --- | --- | --- | --- | --- | --- | --- | --- | --- | --- | --- | --- | --- | --- | --- | --- | --- | --- | --- | --- | --- | --- | --- | --- | --- | --- | --- | --- | --- | --- | --- | --- | --- | --- | --- | --- | --- | --- | --- | --- | --- | --- | --- | --- | --- | --- | --- | --- | --- | --- | --- | --- | --- | --- | --- | --- | --- | --- | --- | --- | --- | --- | --- | --- | --- | --- | --- | --- | --- | --- | --- | --- | --- | --- | --- | --- | --- | --- | --- | --- | --- | --- | --- | --- | --- | --- | --- | --- | --- | --- | --- | --- | --- | --- | --- | --- | --- | --- | --- | --- | --- | --- | --- | --- | --- | --- | --- | --- | --- | --- | --- | --- | --- | --- | --- | --- | --- | --- | --- | --- | --- | --- | --- | --- | --- | --- | --- | --- | --- | --- | --- | --- | --- | --- | --- | --- | --- | --- | --- | --- | --- | --- | --- | --- | --- | --- | --- | --- | --- | --- | --- | --- | --- | --- | --- | --- | --- | --- | --- | --- | --- | --- | --- | --- | --- | --- | --- | --- | --- | --- | --- | --- | --- | --- | --- | --- | --- | --- | --- | --- | --- | --- | --- | --- | --- | --- | --- | --- | --- | --- | --- | --- | --- | --- | --- | --- | --- | --- | --- | --- | --- | --- | --- | --- | --- | --- | --- | --- | --- | --- | --- | --- | --- | --- | --- | --- | --- | --- | --- | --- | --- | --- | --- | --- | --- | --- | --- | --- | --- | --- | --- | --- | --- | --- | --- | --- | --- | --- | --- | --- | --- | --- | --- | --- | --- | --- | --- | --- | --- | --- | --- | --- | --- | --- | --- | --- | --- | --- | --- | --- | --- | --- | --- | --- | --- | --- | --- | --- | --- | --- | --- | --- | --- | --- | --- | --- | --- | --- | --- | --- | --- | --- | --- | --- | --- | --- | --- | --- | --- | --- | --- | --- | --- | --- | --- | --- | --- | --- | --- | --- | --- | --- | --- | --- | --- | --- | --- | --- | --- | --- | --- | --- | --- | --- | --- | --- | --- | --- | --- | --- | --- | --- | --- | --- | --- | --- | --- | --- | --- | --- | --- | --- | --- | --- | --- | --- | --- | --- | --- | --- | --- | --- | --- | --- | --- | --- | --- | --- | --- | --- | --- | --- | --- | --- | --- | --- | --- | --- | --- | --- | --- | --- | --- | --- | --- | --- | --- | --- | --- | --- | --- | --- | --- | --- | --- | --- | --- | --- | --- | --- | --- | --- | --- | --- | --- | --- | --- | --- | --- | --- | --- | --- | --- | --- | --- | --- | --- | --- | --- | --- | --- | --- | --- | --- | --- | --- | --- | --- | --- | --- | --- | --- | --- | --- | --- | --- | --- | --- | --- | --- | --- | --- | --- | --- | --- | --- | --- | --- | --- | --- | --- | --- | --- | --- | --- | --- | --- | --- | --- | --- | --- | --- | --- | --- | --- | --- | --- | --- | --- | --- | --- | --- | --- | --- | --- | --- | --- | --- | --- | --- | --- | --- | --- | --- | --- | --- | --- | --- | --- | --- | --- | --- | --- | --- | --- | --- | --- | --- | --- | --- | --- | --- | --- | --- | --- | --- | --- | --- | --- | --- | --- | --- | --- | --- | --- | --- | --- | --- | --- | --- | --- | --- | --- | --- | --- | --- | --- | --- | --- | --- | --- | --- | --- | --- | --- | --- | --- | --- | --- | --- | --- | --- | --- | --- | --- | --- | --- | --- | --- | --- | --- | --- | --- | --- | --- | --- | --- | --- | --- | --- | --- | --- | --- | --- | --- | --- | --- | --- | --- | --- | --- | --- | --- | --- | --- | --- | --- | --- | --- | --- | --- | --- | --- | --- | --- | --- | --- | --- | --- | --- | --- | --- | --- | --- | --- | --- | --- | --- | --- | --- | --- | --- | --- | --- | --- | --- | --- | --- | --- | --- | --- | --- | --- | --- | --- | --- | --- | --- | --- | --- | --- | --- | --- | --- | --- | --- | --- | --- | --- | --- | --- | --- | --- | --- | --- | --- | --- | --- | --- | --- | --- | --- | --- | --- | --- | --- | --- | --- | --- | --- | --- | --- | --- | --- | --- | --- | --- | --- | --- | --- | --- | --- | --- | --- | --- | --- | --- | --- | --- | --- | --- | --- | --- | --- | --- | --- | --- | --- | --- | --- | --- | --- | --- | --- | --- | --- | --- | --- | --- | --- | --- | --- | --- | --- | --- | --- | --- | --- | --- | --- | --- | --- | --- | --- | --- | --- | --- | --- | --- | --- | --- | --- | --- | --- | --- | --- | --- | --- | --- | --- | --- | --- | --- | --- | --- | --- | --- | --- | --- | --- | --- | --- | --- | --- | --- | --- | --- | --- | --- | --- | --- | --- | --- | --- | --- | --- | --- | --- | --- | --- | --- | --- | --- | --- | --- | --- | --- | --- | --- | --- | --- | --- | --- | --- | --- | --- | --- | --- | --- | --- | --- | --- | --- | --- | --- | --- | --- | --- | --- | --- | --- | --- | --- | --- | --- | --- | --- | --- | --- | --- | --- | --- | --- | --- | --- | --- | --- | --- | --- | --- | --- | --- | --- | --- | --- | --- | --- | --- | --- | --- | --- | --- | --- | --- | --- | --- | --- | --- | --- | --- | --- | --- | --- | --- | --- | --- | --- | --- | --- | --- | --- | --- | --- | --- | --- | --- | --- | --- | --- | --- | --- | --- | --- | --- | --- | --- | --- | --- | --- | --- | --- | --- | --- | --- | --- | --- | --- | --- | --- | --- | --- | --- | --- | --- | --- | --- | --- | --- | --- | --- | --- | --- | --- | --- | --- | --- | --- | --- | --- | --- | --- | --- | --- |

a The variants together explain 3.9% of the variation in Serum Albumin Level (R2 = 0.039; F (TOTAL) = 58.604).

b Increase in Serum Albumin Level in per effect allele.

c Effect Allele Frequency

d Minor Allele Frequency

| Characteristics of the single nucleotide polymorphisms (SNP) used as instrumental variables for Receptor for advanced glycosylation end products levelsa |
| --- |

| SNP | Effect Allele | Other Allele | Effect (BETA)b | EAFc | MAFd | Standard Error | P-Value |
| --- | --- | --- | --- | --- | --- | --- | --- |
| rs12368376 | G | C | -0.1129 | 0.1658 | 0.1658 | 0.0155 | 2.95E-13 |
| rs204993 | G | A | -0.1489 | 0.2557 | 0.2557 | 0.0119 | 1.20E-35 |
| rs2076295 | G | T | 0.0611 | 0.4505 | 0.4505 | 0.0106 | 7.82E-09 |
| rs2487928 | A | G | -0.0705 | 0.4571 | 0.4571 | 0.0103 | 7.43E-12 |
| rs2609280 | G | A | -0.0678 | 0.7584 | 0.2416 | 0.0121 | 2.30E-08 |
| rs333947 | A | G | -0.0854 | 0.1565 | 0.1565 | 0.0144 | 3.09E-09 |
| rs4740273 | G | A | -0.1177 | 0.5598 | 0.4402 | 0.0133 | 7.62E-19 |
| rs4933402 | G | C | 0.0584 | 0.469 | 0.469 | 0.0104 | 1.72E-08 |
| rs7309382 | C | T | 0.0593 | 0.417 | 0.417 | 0.0106 | 2.15E-08 |

a The variants together explain 6.1% of the variation in Receptor for advanced glycosylation end products level (R2 = 0.061; F (TOTAL) = 147.403).

b Increase in Receptor for advanced glycosylation end products level in per effect allele.

c Effect Allele Frequency

d Minor Allele Frequency

| Characteristics of the single nucleotide polymorphisms (SNP) used as instrumental variables for Breast Cancera | | | | | | | |
| --- | --- | --- | --- | --- | --- | --- | --- |
| SNP | Effect Allele | Other Allele | Effect (BETA)b | EAFc | MAFd | Standard Error | P-Value | |
| rs10022462 | T | C | 0.0375 | 0.4379 | 0.4379 | 0.0062 | 1.55E-09 | |
| rs10054203 | C | G | 0.0383 | 0.4094 | 0.4094 | 0.0065 | 3.21E-09 | |
| rs10096351 | G | A | 0.1055 | 0.5441 | 0.4559 | 0.0062 | 1.97E-64 | |
| rs10760444 | A | G | -0.0358 | 0.5667 | 0.4333 | 0.0062 | 9.06E-09 | |
| rs10885405 | T | C | 0.0465 | 0.46 | 0.46 | 0.0062 | 5.44E-14 | |
| rs10941679 | G | A | 0.1278 | 0.2522 | 0.2522 | 0.0071 | 5.61E-73 | |
| rs10978911 | C | G | 0.0839 | 0.1361 | 0.1361 | 0.0091 | 2.36E-20 | |
| rs10995201 | G | A | -0.1317 | 0.1591 | 0.1591 | 0.0087 | 1.56E-51 | |
| rs11117758 | A | G | -0.0449 | 0.2086 | 0.2086 | 0.0076 | 3.90E-09 | |
| rs11135046 | T | G | -0.0717 | 0.5529 | 0.4471 | 0.0062 | 4.68E-31 | |
| rs11205303 | C | T | 0.0497 | 0.3998 | 0.3998 | 0.0064 | 1.14E-14 | |
| rs1121948 | G | A | 0.0575 | 0.1963 | 0.1963 | 0.0077 | 7.48E-14 | |
| rs11249433 | G | A | 0.0988 | 0.403 | 0.403 | 0.0065 | 1.76E-52 | |
| rs11571833 | T | A | 0.2727 | 0.0081 | 0.0081 | 0.0346 | 3.10E-15 | |
| rs11583393 | A | C | -0.0396 | 0.249 | 0.249 | 0.0072 | 3.61E-08 | |
| rs11624333 | C | T | -0.0968 | 0.2595 | 0.2595 | 0.0071 | 6.50E-42 | |
| rs11672660 | T | C | 0.0472 | 0.213 | 0.213 | 0.008 | 4.13E-09 | |
| rs11684853 | T | G | -0.0442 | 0.5606 | 0.4394 | 0.0062 | 1.12E-12 | |
| rs117618124 | C | T | -0.1074 | 0.0453 | 0.0453 | 0.0156 | 5.46E-12 | |
| rs117737783 | A | G | 0.0747 | 0.0728 | 0.0728 | 0.0127 | 4.03E-09 | |
| rs11822830 | G | A | 0.0483 | 0.5959 | 0.4041 | 0.0063 | 1.98E-14 | |
| rs11903787 | A | G | -0.0451 | 0.2405 | 0.2405 | 0.0076 | 2.36E-09 | |
| rs11977670 | A | G | 0.0522 | 0.4315 | 0.4315 | 0.0063 | 1.05E-16 | |
| rs12207986 | A | G | 0.0375 | 0.5362 | 0.4638 | 0.0062 | 1.45E-09 | |
| rs12250948 | C | T | -0.0576 | 0.7844 | 0.2156 | 0.0074 | 1.04E-14 | |
| rs1230666 | G | A | -0.0592 | 0.8721 | 0.1279 | 0.0095 | 3.87E-10 | |
| rs12479355 | G | A | -0.0426 | 0.2088 | 0.2088 | 0.0076 | 2.36E-08 | |
| rs12487185 | G | A | 0.045 | 0.3128 | 0.3128 | 0.0066 | 1.21E-11 | |
| rs12513872 | A | G | 0.0413 | 0.7485 | 0.2515 | 0.0073 | 1.46E-08 | |
| rs12519859 | A | G | 0.0365 | 0.4748 | 0.4748 | 0.0063 | 5.77E-09 | |
| rs12546444 | T | A | -0.0717 | 0.1001 | 0.1001 | 0.011 | 7.45E-11 | |
| rs1268974 | G | A | -0.0793 | 0.6132 | 0.3868 | 0.0063 | 3.71E-36 | |
| rs12990503 | G | C | -0.073 | 0.7372 | 0.2628 | 0.007 | 9.99E-26 | |
| rs13066793 | G | A | -0.0685 | 0.0925 | 0.0925 | 0.0112 | 1.04E-09 | |
| rs13267382 | G | A | -0.0437 | 0.6493 | 0.3507 | 0.0065 | 1.60E-11 | |
| rs1498608 | A | T | -0.0671 | 0.0949 | 0.0949 | 0.0107 | 3.48E-10 | |
| rs1685191 | T | C | -0.0586 | 0.5647 | 0.4353 | 0.0064 | 3.87E-20 | |
| rs16991615 | A | G | 0.0758 | 0.0626 | 0.0626 | 0.0126 | 1.92E-09 | |
| rs1707302 | G | A | 0.0364 | 0.6641 | 0.3359 | 0.0066 | 2.95E-08 | |
| rs170801 | A | C | -0.0591 | 0.2817 | 0.2817 | 0.007 | 3.17E-17 | |
| rs17156577 | C | T | 0.0578 | 0.1121 | 0.1121 | 0.0098 | 4.25E-09 | |
| rs17185310 | A | G | 0.0395 | 0.3034 | 0.3034 | 0.0069 | 8.70E-09 | |
| rs17268829 | C | T | 0.0495 | 0.2804 | 0.2804 | 0.0068 | 4.49E-13 | |
| rs17426269 | A | G | 0.0487 | 0.1488 | 0.1488 | 0.0086 | 1.74E-08 | |
| rs1778523 | G | C | -0.0384 | 0.3567 | 0.3567 | 0.0066 | 7.55E-09 | |
| rs1973765 | C | T | -0.0817 | 0.4001 | 0.4001 | 0.0064 | 9.71E-38 | |
| rs1985742 | T | A | 0.0588 | 0.3516 | 0.3516 | 0.0065 | 8.10E-20 | |
| rs2016394 | A | G | -0.0425 | 0.4748 | 0.4748 | 0.0062 | 6.23E-12 | |
| rs2253012 | T | C | 0.0433 | 0.4318 | 0.4318 | 0.0065 | 3.13E-11 | |
| rs2403907 | A | C | -0.0796 | 0.3159 | 0.3159 | 0.0067 | 1.87E-32 | |
| rs2432539 | G | A | -0.0349 | 0.5996 | 0.4004 | 0.0064 | 4.02E-08 | |
| rs2506889 | T | C | -0.0615 | 0.3185 | 0.3185 | 0.0067 | 2.38E-20 | |
| rs2747652 | C | T | 0.0663 | 0.5263 | 0.4737 | 0.0062 | 1.31E-26 | |
| rs2787486 | C | A | -0.0758 | 0.3002 | 0.3002 | 0.0068 | 5.56E-29 | |
| rs28512361 | A | G | 0.0611 | 0.1127 | 0.1127 | 0.0109 | 2.25E-08 | |
| rs2853669 | G | A | -0.0651 | 0.3061 | 0.3061 | 0.0069 | 4.05E-21 | |
| rs2965183 | A | G | 0.0445 | 0.3521 | 0.3521 | 0.0065 | 6.31E-12 | |
| rs2992756 | C | T | -0.0506 | 0.5194 | 0.4806 | 0.0063 | 1.60E-15 | |
| rs332529 | A | G | -0.0606 | 0.1605 | 0.1605 | 0.0089 | 9.02E-12 | |
| rs35383942 | T | C | 0.101 | 0.0562 | 0.0562 | 0.0139 | 3.79E-13 | |
| rs35910339 | G | C | 0.0462 | 0.6889 | 0.3111 | 0.0067 | 5.41E-12 | |
| rs3769821 | T | C | -0.0565 | 0.6683 | 0.3317 | 0.0065 | 3.97E-18 | |
| rs3821902 | G | T | 0.0623 | 0.1358 | 0.1358 | 0.0089 | 2.99E-12 | |
| rs3903072 | T | G | -0.0434 | 0.4727 | 0.4727 | 0.0062 | 2.25E-12 | |
| rs4081859 | A | G | 0.0521 | 0.7517 | 0.2483 | 0.0073 | 7.08E-13 | |
| rs418053 | C | G | -0.0465 | 0.5685 | 0.4315 | 0.0063 | 1.20E-13 | |
| rs4233486 | T | C | 0.0396 | 0.6514 | 0.3486 | 0.0069 | 9.09E-09 | |
| rs4286946 | G | C | -0.0799 | 0.1739 | 0.1739 | 0.0083 | 8.63E-22 | |
| rs4442975 | T | G | -0.1274 | 0.5021 | 0.4979 | 0.0061 | 1.14E-95 | |
| rs4496150 | A | C | -0.0416 | 0.2466 | 0.2466 | 0.0072 | 8.09E-09 | |
| rs4562056 | T | G | 0.0416 | 0.3323 | 0.3323 | 0.0067 | 4.72E-10 | |
| rs4702131 | C | T | -0.0424 | 0.5612 | 0.4388 | 0.0062 | 1.00E-11 | |
| rs4784227 | T | C | 0.2153 | 0.2387 | 0.2387 | 0.0071 | 1.00E-200 | |
| rs4820318 | A | G | -0.0475 | 0.3753 | 0.3753 | 0.0064 | 1.03E-13 | |
| rs4848599 | C | T | 0.0933 | 0.8845 | 0.1155 | 0.01 | 1.58E-20 | |
| rs4971059 | A | G | 0.0424 | 0.3632 | 0.3632 | 0.0064 | 4.83E-11 | |
| rs527616 | G | C | 0.0499 | 0.6211 | 0.3789 | 0.0064 | 6.70E-15 | |
| rs532436 | A | G | 0.0431 | 0.2027 | 0.2027 | 0.0078 | 2.91E-08 | |
| rs56013747 | C | A | -0.0497 | 0.8273 | 0.1727 | 0.009 | 3.74E-08 | |
| rs56387622 | C | T | -0.0942 | 0.1012 | 0.1012 | 0.0106 | 5.47E-19 | |
| rs56971155 | T | C | -0.0424 | 0.3934 | 0.3934 | 0.0064 | 3.63E-11 | |
| rs57212245 | A | G | -0.0652 | 0.0783 | 0.0783 | 0.0119 | 4.09E-08 | |
| rs58058861 | A | G | 0.0474 | 0.2172 | 0.2172 | 0.0074 | 1.91E-10 | |
| rs5995875 | T | C | 0.1206 | 0.1068 | 0.1068 | 0.0098 | 9.04E-35 | |
| rs5997389 | A | G | 0.0791 | 0.0903 | 0.0903 | 0.0108 | 2.19E-13 | |
| rs60954078 | G | A | 0.1817 | 0.07 | 0.07 | 0.0117 | 2.84E-54 | |
| rs6122906 | G | A | 0.0507 | 0.1816 | 0.1816 | 0.008 | 2.45E-10 | |
| rs62048402 | A | G | -0.0624 | 0.4156 | 0.4156 | 0.0063 | 3.50E-23 | |
| rs62237573 | T | C | 0.4256 | 0.0092 | 0.0092 | 0.034 | 6.87E-36 | |
| rs62331150 | T | G | 0.0494 | 0.2263 | 0.2263 | 0.0074 | 1.85E-11 | |
| rs62355901 | C | T | 0.1734 | 0.1602 | 0.1602 | 0.0082 | 3.42E-98 | |
| rs62485509 | T | G | -0.0545 | 0.2292 | 0.2292 | 0.0079 | 4.45E-12 | |
| rs630965 | T | C | 0.0992 | 0.6196 | 0.3804 | 0.0064 | 3.21E-54 | |
| rs6472903 | T | G | 0.0778 | 0.8261 | 0.1739 | 0.0083 | 4.43E-21 | |
| rs6562760 | G | A | 0.0443 | 0.766 | 0.234 | 0.0073 | 1.49E-09 | |
| rs6569648 | T | C | 0.0512 | 0.7643 | 0.2357 | 0.0073 | 2.98E-12 | |
| rs6596100 | T | C | -0.0439 | 0.2427 | 0.2427 | 0.0076 | 7.74E-09 | |
| rs6597981 | G | A | 0.0439 | 0.5178 | 0.4822 | 0.0062 | 1.35E-12 | |
| rs66572733 | G | C | 0.095 | 0.037 | 0.037 | 0.0162 | 4.74E-09 | |
| rs67087079 | A | G | 0.0527 | 0.1251 | 0.1251 | 0.0093 | 1.32E-08 | |
| rs6725517 | G | A | -0.0468 | 0.4088 | 0.4088 | 0.0067 | 2.93E-12 | |
| rs6787391 | T | C | 0.0567 | 0.3807 | 0.3807 | 0.0064 | 9.07E-19 | |
| rs68056147 | A | G | 0.0501 | 0.299 | 0.299 | 0.0069 | 5.36E-13 | |
| rs6815814 | C | A | 0.052 | 0.2525 | 0.2525 | 0.0072 | 6.13E-13 | |
| rs6882649 | T | G | 0.0388 | 0.6651 | 0.3349 | 0.0066 | 3.67E-09 | |
| rs7072776 | G | A | -0.0618 | 0.7124 | 0.2876 | 0.0068 | 1.75E-19 | |
| rs7149262 | A | C | -0.0724 | 0.2113 | 0.2113 | 0.0076 | 2.47E-21 | |
| rs71557345 | A | G | -0.0806 | 0.0806 | 0.0806 | 0.0129 | 3.87E-10 | |
| rs71559437 | A | G | -0.0686 | 0.122 | 0.122 | 0.0099 | 5.05E-12 | |
| rs7223535 | A | G | -0.0439 | 0.268 | 0.268 | 0.007 | 3.53E-10 | |
| rs7258465 | C | T | -0.0725 | 0.3436 | 0.3436 | 0.0066 | 2.79E-28 | |
| rs72658071 | T | A | 0.1182 | 0.0877 | 0.0877 | 0.0107 | 2.58E-28 | |
| rs72725173 | A | G | 0.0559 | 0.1578 | 0.1578 | 0.0085 | 3.88E-11 | |
| rs72755295 | G | A | 0.1376 | 0.0309 | 0.0309 | 0.0179 | 1.65E-14 | |
| rs73949122 | G | C | -0.0593 | 0.1664 | 0.1664 | 0.0084 | 1.85E-12 | |
| rs7500067 | G | A | 0.0785 | 0.2293 | 0.2293 | 0.0073 | 4.06E-27 | |
| rs7626742 | T | G | 0.1046 | 0.5327 | 0.4673 | 0.0062 | 1.61E-63 | |
| rs7650602 | C | T | 0.0489 | 0.4422 | 0.4422 | 0.0063 | 6.22E-15 | |
| rs76956704 | T | C | 0.1352 | 0.03 | 0.03 | 0.0182 | 1.27E-13 | |
| rs7697216 | C | T | 0.1039 | 0.8819 | 0.1181 | 0.0098 | 1.61E-26 | |
| rs77528541 | T | G | -0.0583 | 0.1361 | 0.1361 | 0.0096 | 1.41E-09 | |
| rs77554484 | A | C | -0.0741 | 0.1319 | 0.1319 | 0.0093 | 1.28E-15 | |
| rs78425380 | C | T | 0.0603 | 0.1139 | 0.1139 | 0.0099 | 1.03E-09 | |
| rs78440108 | T | C | -0.0595 | 0.1718 | 0.1718 | 0.0084 | 1.62E-12 | |
| rs78540526 | T | C | 0.2758 | 0.0756 | 0.0756 | 0.0113 | 1.81E-131 | |
| rs7904249 | A | G | 0.0764 | 0.1592 | 0.1592 | 0.0084 | 6.98E-20 | |
| rs7971 | G | A | -0.0365 | 0.3531 | 0.3531 | 0.0065 | 1.93E-08 | |
| rs8082452 | G | T | -0.0418 | 0.4562 | 0.4562 | 0.0065 | 1.14E-10 | |
| rs9284657 | G | C | 0.0366 | 0.5005 | 0.4995 | 0.0062 | 3.36E-09 | |
| rs9361840 | G | A | 0.0541 | 0.2368 | 0.2368 | 0.0072 | 7.14E-14 | |
| rs941764 | G | A | 0.0463 | 0.3429 | 0.3429 | 0.0065 | 8.21E-13 | |
| rs9693444 | C | A | -0.0626 | 0.6757 | 0.3243 | 0.0066 | 1.60E-21 | |
| rs9833888 | T | G | 0.0457 | 0.2259 | 0.2259 | 0.0074 | 5.15E-10 | |
| rs9952980 | C | T | -0.0478 | 0.3504 | 0.3504 | 0.0065 | 1.65E-13 | |
| rs9954058 | C | G | -0.0891 | 0.0721 | 0.0721 | 0.0122 | 2.79E-13 | |

a The variants together explain 5.9% of the variation in Breast Cancer (R2 = 0.059; F (TOTAL) = 100.001).

b Increase in odds of Breast Cancer in per effect allele.

c Effect Allele Frequency

d Minor Allele Frequency

| Characteristics of the single nucleotide polymorphisms (SNP) used as instrumental variables for Age at First Birth (Female)a   | SNP | Effect Allele | Other Allele | Effect (BETA)b | EAFc | MAFd | Standard Error | P-Value | | --- | --- | --- | --- | --- | --- | --- | --- | | rs10445366 | C | G | -0.0886 | 0.2028 | 0.2028 | 0.0136 | 6.69E-11 | | rs10752613 | A | T | -0.0715 | 0.2744 | 0.2744 | 0.0102 | 1.89E-12 | | rs10786831 | G | A | 0.0519 | 0.3817 | 0.3817 | 0.0092 | 1.68E-08 | | rs10941692 | C | T | 0.0702 | 0.2078 | 0.2078 | 0.0114 | 8.84E-10 | | rs10962552 | T | C | -0.0707 | 0.8380 | 0.162 | 0.0128 | 3.12E-08 | | rs11081529 | C | T | -0.0595 | 0.2495 | 0.2495 | 0.0099 | 1.81E-09 | | rs11167753 | C | T | -0.0574 | 0.2654 | 0.2654 | 0.01 | 1.04E-08 | | rs112282597 | G | A | 0.0631 | 0.7515 | 0.2485 | 0.0112 | 1.57E-08 | | rs11249939 | A | G | 0.0633 | 0.6491 | 0.3509 | 0.0099 | 1.56E-10 | | rs112512729 | G | T | 0.0965 | 0.0557 | 0.0557 | 0.0175 | 3.50E-08 | | rs113247159 | C | T | 0.0641 | 0.3121 | 0.3121 | 0.0115 | 2.68E-08 | | rs11774212 | T | C | 0.0551 | 0.5020 | 0.498 | 0.0096 | 1.08E-08 | | rs11887646 | G | A | 0.0707 | 0.7366 | 0.2634 | 0.0112 | 2.25E-10 | | rs11915934 | G | A | -0.073 | 0.1690 | 0.169 | 0.0122 | 2.25E-09 | | rs12407439 | G | A | 0.0754 | 0.8449 | 0.1551 | 0.0138 | 4.37E-08 | | rs12815613 | G | A | 0.0564 | 0.6829 | 0.3171 | 0.0097 | 5.75E-09 | | rs13319205 | A | T | -0.0646 | 0.2922 | 0.2922 | 0.0106 | 9.85E-10 | | rs13413037 | G | A | -0.0577 | 0.4195 | 0.4195 | 0.0097 | 2.30E-09 | | rs13420733 | A | T | 0.0595 | 0.2315 | 0.2315 | 0.0104 | 1.22E-08 | | rs142800469 | T | C | 0.0562 | 0.5755 | 0.4245 | 0.0099 | 1.31E-08 | | rs1430901 | G | A | 0.0562 | 0.4304 | 0.4304 | 0.0093 | 1.33E-09 | | rs1464534 | G | C | 0.0606 | 0.7048 | 0.2952 | 0.0099 | 1.00E-09 | | rs1590949 | G | C | 0.0583 | 0.5676 | 0.4324 | 0.0095 | 8.24E-10 | | rs1606974 | G | A | -0.0747 | 0.5382 | 0.4618 | 0.0137 | 4.61E-08 | | rs1702877 | T | C | 0.0602 | 0.3270 | 0.327 | 0.0098 | 8.22E-10 | | rs17314804 | T | C | 0.0662 | 0.6521 | 0.3479 | 0.0095 | 2.67E-12 | | rs17391694 | T | C | -0.083 | 0.9036 | 0.0964 | 0.0135 | 8.15E-10 | | rs17731405 | G | A | -0.0735 | 0.8449 | 0.1551 | 0.0129 | 1.21E-08 | | rs1859100 | G | T | -0.0539 | 0.4682 | 0.4682 | 0.0094 | 1.08E-08 | | rs2069278 | C | T | -0.0576 | 0.3300 | 0.33 | 0.0097 | 3.13E-09 | | rs2253763 | C | T | -0.0534 | 0.6312 | 0.3688 | 0.0098 | 4.58E-08 | | rs2347867 | A | G | 0.0818 | 0.6839 | 0.3161 | 0.0095 | 5.04E-18 | | rs2530597 | G | C | -0.0549 | 0.3847 | 0.3847 | 0.0097 | 1.70E-08 | | rs2906457 | C | A | 0.0649 | 0.6948 | 0.3052 | 0.0103 | 2.92E-10 | | rs293566 | C | T | -0.0694 | 0.6859 | 0.3141 | 0.0099 | 2.18E-12 | | rs33920398 | C | T | -0.0573 | 0.2853 | 0.2853 | 0.0104 | 3.93E-08 | | rs34137317 | T | C | 0.2473 | 0.9891 | 0.0109 | 0.04 | 6.15E-10 | | rs4244533 | A | G | -0.0719 | 0.8111 | 0.1889 | 0.0119 | 1.33E-09 | | rs4443016 | G | C | 0.0706 | 0.4841 | 0.4841 | 0.0095 | 1.02E-13 | | rs55988458 | A | G | 0.0726 | 0.2127 | 0.2127 | 0.0119 | 1.16E-09 | | rs57432042 | C | T | 0.0905 | 0.0855 | 0.0855 | 0.0165 | 4.57E-08 | | rs5763436 | T | A | -0.0542 | 0.5805 | 0.4195 | 0.0097 | 1.94E-08 | | rs590076 | A | G | -0.0553 | 0.3519 | 0.3519 | 0.0095 | 5.78E-09 | | rs60222682 | T | C | -0.0646 | 0.8400 | 0.16 | 0.0117 | 3.51E-08 | | rs61750814 | C | T | -0.0796 | 0.1720 | 0.172 | 0.0129 | 6.32E-10 | | rs62261746 | G | C | 0.0576 | 0.6889 | 0.3111 | 0.0104 | 2.85E-08 | | rs6574018 | T | G | 0.0556 | 0.6610 | 0.339 | 0.01 | 2.42E-08 | | rs6585429 | G | A | 0.084 | 0.1928 | 0.1928 | 0.0124 | 1.08E-11 | | rs6677536 | A | C | 0.0553 | 0.5765 | 0.4235 | 0.0101 | 3.85E-08 | | rs6908444 | A | G | -0.0558 | 0.6272 | 0.3728 | 0.0102 | 4.51E-08 | | rs6923535 | A | G | -0.052 | 0.4066 | 0.4066 | 0.0093 | 2.12E-08 | | rs693691 | C | T | -0.077 | 0.8559 | 0.1441 | 0.0135 | 1.26E-08 | | rs72704712 | G | T | -0.0879 | 0.1879 | 0.1879 | 0.0133 | 4.56E-11 | | rs72779695 | T | C | -0.0849 | 0.8887 | 0.1113 | 0.0145 | 4.87E-09 | | rs7359501 | T | C | 0.0565 | 0.6213 | 0.3787 | 0.0094 | 1.82E-09 | | rs7516843 | G | A | 0.0611 | 0.6352 | 0.3648 | 0.0097 | 3.12E-10 | | rs78928669 | G | A | 0.142 | 0.9642 | 0.0358 | 0.0259 | 4.22E-08 | | rs7958796 | T | A | -0.0676 | 0.3489 | 0.3489 | 0.0101 | 2.15E-11 | | rs80153284 | A | C | 0.2314 | 0.0139 | 0.0139 | 0.0411 | 1.74E-08 | | rs8030494 | A | C | 0.0545 | 0.5934 | 0.4066 | 0.0096 | 1.30E-08 | | rs8110682 | C | T | 0.0695 | 0.3658 | 0.3658 | 0.011 | 2.59E-10 | | rs9401333 | C | A | -0.0705 | 0.4016 | 0.4016 | 0.0101 | 3.24E-12 | | rs9540715 | A | C | 0.0588 | 0.4881 | 0.4881 | 0.01 | 4.74E-09 | | rs9818010 | T | G | 0.063 | 0.7117 | 0.2883 | 0.0102 | 5.63E-10 | | rs9838987 | G | A | -0.1175 | 0.4861 | 0.4861 | 0.0098 | 5.55E-33 | |
| --- | --- | --- | --- | --- | --- | --- | --- | --- | --- | --- | --- | --- | --- | --- | --- | --- | --- | --- | --- | --- | --- | --- | --- | --- | --- | --- | --- | --- | --- | --- | --- | --- | --- | --- | --- | --- | --- | --- | --- | --- | --- | --- | --- | --- | --- | --- | --- | --- | --- | --- | --- | --- | --- | --- | --- | --- | --- | --- | --- | --- | --- | --- | --- | --- | --- | --- | --- | --- | --- | --- | --- | --- | --- | --- | --- | --- | --- | --- | --- | --- | --- | --- | --- | --- | --- | --- | --- | --- | --- | --- | --- | --- | --- | --- | --- | --- | --- | --- | --- | --- | --- | --- | --- | --- | --- | --- | --- | --- | --- | --- | --- | --- | --- | --- | --- | --- | --- | --- | --- | --- | --- | --- | --- | --- | --- | --- | --- | --- | --- | --- | --- | --- | --- | --- | --- | --- | --- | --- | --- | --- | --- | --- | --- | --- | --- | --- | --- | --- | --- | --- | --- | --- | --- | --- | --- | --- | --- | --- | --- | --- | --- | --- | --- | --- | --- | --- | --- | --- | --- | --- | --- | --- | --- | --- | --- | --- | --- | --- | --- | --- | --- | --- | --- | --- | --- | --- | --- | --- | --- | --- | --- | --- | --- | --- | --- | --- | --- | --- | --- | --- | --- | --- | --- | --- | --- | --- | --- | --- | --- | --- | --- | --- | --- | --- | --- | --- | --- | --- | --- | --- | --- | --- | --- | --- | --- | --- | --- | --- | --- | --- | --- | --- | --- | --- | --- | --- | --- | --- | --- | --- | --- | --- | --- | --- | --- | --- | --- | --- | --- | --- | --- | --- | --- | --- | --- | --- | --- | --- | --- | --- | --- | --- | --- | --- | --- | --- | --- | --- | --- | --- | --- | --- | --- | --- | --- | --- | --- | --- | --- | --- | --- | --- | --- | --- | --- | --- | --- | --- | --- | --- | --- | --- | --- | --- | --- | --- | --- | --- | --- | --- | --- | --- | --- | --- | --- | --- | --- | --- | --- | --- | --- | --- | --- | --- | --- | --- | --- | --- | --- | --- | --- | --- | --- | --- | --- | --- | --- | --- | --- | --- | --- | --- | --- | --- | --- | --- | --- | --- | --- | --- | --- | --- | --- | --- | --- | --- | --- | --- | --- | --- | --- | --- | --- | --- | --- | --- | --- | --- | --- | --- | --- | --- | --- | --- | --- | --- | --- | --- | --- | --- | --- | --- | --- | --- | --- | --- | --- | --- | --- | --- | --- | --- | --- | --- | --- | --- | --- | --- | --- | --- | --- | --- | --- | --- | --- | --- | --- | --- | --- | --- | --- | --- | --- | --- | --- | --- | --- | --- | --- | --- | --- | --- | --- | --- | --- | --- | --- | --- | --- | --- | --- | --- | --- | --- | --- | --- | --- | --- | --- | --- | --- | --- | --- | --- | --- | --- | --- | --- | --- | --- | --- | --- | --- | --- | --- | --- | --- | --- | --- | --- | --- | --- | --- | --- | --- | --- | --- | --- | --- | --- | --- | --- | --- | --- | --- | --- | --- | --- | --- | --- | --- | --- | --- | --- | --- | --- | --- | --- | --- | --- | --- | --- | --- | --- | --- | --- | --- | --- | --- | --- | --- | --- | --- | --- | --- | --- | --- | --- | --- | --- | --- | --- | --- | --- | --- | --- | --- | --- | --- | --- | --- | --- | --- | --- | --- | --- | --- | --- | --- | --- | --- | --- | --- | --- | --- | --- | --- | --- |

a The variants together explain 1.3% of the variation in Age at First Birth (Female) (R2 = 0.013; F (TOTAL) = 108.571).

b Increase in Age at First Birth (Female) in per effect allele.

c Effect Allele Frequency

d Minor Allele Frequency

| Characteristics of the single nucleotide polymorphisms (SNP) used as instrumental variables for Age At Menarche (Female)a   | SNP | Effect Allele | Other Allele | Effect (BETA)b | EAFc | MAFd | Standard Error | P-Value | | --- | --- | --- | --- | --- | --- | --- | --- | | rs10049090 | A | G | -0.034 | 0.4036 | 0.4036 | 0.00439158 | 9.78E-15 | | rs10076858 | A | G | -0.034 | 0.6769 | 0.3231 | 0.00469659 | 4.51E-13 | | rs10134333 | T | C | -0.064 | 0.9533 | 0.0467 | 0.011032 | 6.58E-09 | | rs10138913 | C | T | -0.054 | 0.6928 | 0.3072 | 0.0046163 | 1.31E-31 | | rs10237306 | T | G | 0.029 | 0.6233 | 0.3767 | 0.00444519 | 6.85E-11 | | rs10400136 | A | G | -0.028 | 0.5746 | 0.4254 | 0.00438807 | 1.76E-10 | | rs107068 | G | A | 0.029 | 0.5209 | 0.4791 | 0.00413753 | 2.40E-12 | | rs10746733 | G | A | -0.042 | 0.5507 | 0.4493 | 0.00444945 | 3.75E-21 | | rs10750766 | A | C | -0.029 | 0.7097 | 0.2903 | 0.00486189 | 2.45E-09 | | rs10767659 | T | G | 0.034 | 0.3032 | 0.3032 | 0.00456535 | 9.52E-14 | | rs10791503 | C | T | 0.047 | 0.6372 | 0.3628 | 0.00446265 | 6.16E-26 | | rs1079866 | G | C | 0.072 | 0.1402 | 0.1402 | 0.00623144 | 7.02E-31 | | rs10809360 | T | G | 0.043 | 0.9314 | 0.0686 | 0.00747717 | 8.88E-09 | | rs10821141 | T | C | -0.027 | 0.6382 | 0.3618 | 0.0044217 | 1.02E-09 | | rs10832021 | A | G | -0.048 | 0.7266 | 0.2734 | 0.00471446 | 2.40E-24 | | rs10832646 | T | A | -0.026 | 0.6610 | 0.339 | 0.00458956 | 1.47E-08 | | rs10869351 | C | T | -0.036 | 0.8360 | 0.164 | 0.00538675 | 2.34E-11 | | rs10931078 | T | C | -0.04 | 0.2167 | 0.2167 | 0.00567443 | 1.80E-12 | | rs10931831 | T | C | -0.053 | 0.6402 | 0.3598 | 0.0045298 | 1.27E-31 | | rs10934420 | C | T | 0.053 | 0.5179 | 0.4821 | 0.00419685 | 1.47E-36 | | rs10938397 | G | A | -0.041 | 0.5795 | 0.4205 | 0.00435329 | 4.59E-21 | | rs11031040 | G | T | 0.035 | 0.1610 | 0.161 | 0.00571316 | 9.00E-10 | | rs11062204 | C | T | -0.024 | 0.4105 | 0.4105 | 0.00440001 | 4.91E-08 | | rs11070591 | A | G | 0.03 | 0.3161 | 0.3161 | 0.00471016 | 1.90E-10 | | rs11071023 | A | G | -0.024 | 0.6093 | 0.3907 | 0.00437711 | 4.18E-08 | | rs11075992 | C | T | -0.048 | 0.4135 | 0.4135 | 0.00427635 | 3.09E-29 | | rs11140402 | T | C | -0.043 | 0.1282 | 0.1282 | 0.00674064 | 1.78E-10 | | rs11165924 | G | A | -0.034 | 0.6918 | 0.3082 | 0.00469178 | 4.27E-13 | | rs11191541 | G | A | 0.025 | 0.5855 | 0.4145 | 0.00433874 | 8.31E-09 | | rs112013658 | G | T | -0.043 | 0.0954 | 0.0954 | 0.00764507 | 1.86E-08 | | rs11210871 | G | C | -0.039 | 0.3310 | 0.331 | 0.00477748 | 3.26E-16 | | rs1126930 | C | G | -0.077 | 0.0239 | 0.0239 | 0.0128202 | 1.90E-09 | | rs11575886 | G | A | -0.043 | 0.1233 | 0.1233 | 0.00677961 | 2.26E-10 | | rs11673135 | C | G | -0.032 | 0.1730 | 0.173 | 0.005869 | 4.97E-08 | | rs117008125 | A | G | -0.075 | 0.0328 | 0.0328 | 0.0126944 | 3.46E-09 | | rs1172955 | A | T | -0.042 | 0.3320 | 0.332 | 0.00474888 | 9.22E-19 | | rs11873906 | A | G | -0.051 | 0.7177 | 0.2823 | 0.00481592 | 3.32E-26 | | rs11889802 | T | G | -0.039 | 0.8847 | 0.1153 | 0.00715237 | 4.96E-08 | | rs12091368 | T | C | 0.031 | 0.5040 | 0.496 | 0.0043099 | 6.35E-13 | | rs12168307 | G | T | -0.033 | 0.2783 | 0.2783 | 0.00483232 | 8.55E-12 | | rs12514669 | C | G | -0.039 | 0.2555 | 0.2555 | 0.00512544 | 2.76E-14 | | rs12549420 | T | G | 0.038 | 0.7614 | 0.2386 | 0.00528983 | 6.79E-13 | | rs12566985 | A | G | 0.048 | 0.5467 | 0.4533 | 0.00438299 | 6.54E-28 | | rs12603280 | A | G | -0.035 | 0.2376 | 0.2376 | 0.00506774 | 4.97E-12 | | rs12663002 | T | C | 0.042 | 0.8718 | 0.1282 | 0.00644149 | 7.02E-11 | | rs12793021 | C | A | 0.031 | 0.5716 | 0.4284 | 0.00429427 | 5.24E-13 | | rs13120031 | T | C | 0.025 | 0.6710 | 0.329 | 0.00448513 | 2.49E-08 | | rs13218577 | C | T | -0.029 | 0.3131 | 0.3131 | 0.00489042 | 3.03E-09 | | rs1327938 | C | T | -0.032 | 0.3509 | 0.3509 | 0.00452734 | 1.57E-12 | | rs1356379 | T | C | 0.056 | 0.1014 | 0.1014 | 0.00693298 | 6.62E-16 | | rs1380995 | T | A | 0.034 | 0.5159 | 0.4841 | 0.00427832 | 1.91E-15 | | rs138625771 | C | G | 0.15 | 0.0159 | 0.0159 | 0.0162183 | 2.27E-20 | | rs142058842 | G | C | 0.071 | 0.8469 | 0.1531 | 0.00572432 | 2.51E-35 | | rs1469039 | A | G | 0.042 | 0.8360 | 0.164 | 0.00568824 | 1.54E-13 | | rs1512238 | G | A | 0.053 | 0.5994 | 0.4006 | 0.00425286 | 1.20E-35 | | rs15671 | C | A | 0.024 | 0.4066 | 0.4066 | 0.00434577 | 3.34E-08 | | rs1659127 | A | G | 0.048 | 0.3400 | 0.34 | 0.00463206 | 3.67E-25 | | rs169080 | C | T | 0.029 | 0.3708 | 0.3708 | 0.00456151 | 2.05E-10 | | rs16918378 | C | T | -0.05 | 0.1322 | 0.1322 | 0.00666516 | 6.30E-14 | | rs16937956 | G | A | 0.037 | 0.6064 | 0.3936 | 0.00438496 | 3.23E-17 | | rs17035311 | C | A | -0.035 | 0.8370 | 0.163 | 0.0059915 | 5.17E-09 | | rs17270153 | G | A | 0.059 | 0.9175 | 0.0825 | 0.00717098 | 1.91E-16 | | rs17328643 | G | T | 0.041 | 0.1074 | 0.1074 | 0.00710023 | 7.72E-09 | | rs17449243 | C | T | 0.049 | 0.1541 | 0.1541 | 0.00687581 | 1.03E-12 | | rs1925047 | C | A | 0.034 | 0.7058 | 0.2942 | 0.00457928 | 1.13E-13 | | rs1984870 | T | G | 0.042 | 0.4960 | 0.496 | 0.00444562 | 3.47E-21 | | rs1994234 | G | A | 0.033 | 0.5895 | 0.4105 | 0.00439214 | 5.76E-14 | | rs2042067 | C | T | 0.028 | 0.4592 | 0.4592 | 0.00428765 | 6.56E-11 | | rs213558 | A | G | 0.028 | 0.7753 | 0.2247 | 0.00510345 | 4.10E-08 | | rs2167378 | T | C | -0.04 | 0.5417 | 0.4583 | 0.00428684 | 1.05E-20 | | rs2236129 | G | C | -0.044 | 0.0726 | 0.0726 | 0.00789971 | 2.55E-08 | | rs2267812 | C | A | -0.041 | 0.1938 | 0.1938 | 0.00557234 | 1.87E-13 | | rs2300922 | T | C | 0.043 | 0.5954 | 0.4046 | 0.00431533 | 2.18E-23 | | rs2301597 | C | T | 0.025 | 0.5089 | 0.4911 | 0.00435228 | 9.24E-09 | | rs240788 | G | T | -0.028 | 0.5795 | 0.4205 | 0.00437063 | 1.49E-10 | | rs2438086 | G | A | -0.047 | 0.5567 | 0.4433 | 0.00468655 | 1.14E-23 | | rs247520 | C | T | -0.038 | 0.2376 | 0.2376 | 0.00512871 | 1.27E-13 | | rs2548459 | C | T | 0.024 | 0.4702 | 0.4702 | 0.00437404 | 4.09E-08 | | rs2625387 | A | G | 0.029 | 0.4036 | 0.4036 | 0.00446456 | 8.27E-11 | | rs2688327 | A | T | -0.033 | 0.6938 | 0.3062 | 0.00470584 | 2.34E-12 | | rs2723065 | G | A | 0.025 | 0.3867 | 0.3867 | 0.00431781 | 7.04E-09 | | rs2724961 | C | T | 0.048 | 0.5666 | 0.4334 | 0.00428696 | 4.23E-29 | | rs2744688 | A | G | -0.033 | 0.1402 | 0.1402 | 0.00602221 | 4.26E-08 | | rs2770957 | G | C | -0.034 | 0.7793 | 0.2207 | 0.0051997 | 6.20E-11 | | rs2783994 | A | G | -0.03 | 0.6809 | 0.3191 | 0.0044731 | 1.99E-11 | | rs2798224 | A | G | 0.028 | 0.4245 | 0.4245 | 0.00424075 | 4.04E-11 | | rs2836950 | G | C | -0.032 | 0.3956 | 0.3956 | 0.00445838 | 7.10E-13 | | rs28374463 | C | A | 0.029 | 0.5934 | 0.4066 | 0.00431965 | 1.90E-11 | | rs28532925 | G | A | -0.043 | 0.8479 | 0.1521 | 0.00747216 | 8.68E-09 | | rs29938 | C | T | -0.028 | 0.3449 | 0.3449 | 0.00447795 | 4.03E-10 | | rs2999049 | C | T | 0.033 | 0.2634 | 0.2634 | 0.00472838 | 2.97E-12 | | rs302719 | G | T | 0.028 | 0.3131 | 0.3131 | 0.00466256 | 1.91E-09 | | rs3113862 | G | A | 0.037 | 0.6143 | 0.3857 | 0.00432198 | 1.12E-17 | | rs34415424 | C | T | -0.028 | 0.2853 | 0.2853 | 0.00489575 | 1.07E-08 | | rs34635213 | G | A | 0.042 | 0.8549 | 0.1451 | 0.00619559 | 1.21E-11 | | rs35330978 | T | C | -0.042 | 0.3002 | 0.3002 | 0.00492272 | 1.44E-17 | | rs35935052 | T | G | 0.042 | 0.8598 | 0.1402 | 0.00596138 | 1.85E-12 | | rs3733632 | G | A | 0.054 | 0.1660 | 0.166 | 0.0057903 | 1.10E-20 | | rs3764002 | T | C | -0.028 | 0.7406 | 0.2594 | 0.00504908 | 2.93E-08 | | rs3767357 | G | A | -0.08 | 0.8767 | 0.1233 | 0.00631151 | 8.11E-37 | | rs3943166 | C | A | 0.027 | 0.324 | 0.324 | 0.00453492 | 2.62E-09 | | rs395962 | G | T | -0.12 | 0.6571 | 0.3429 | 0.00447146 | 1.20E-158 | | rs4363822 | G | A | -0.042 | 0.4095 | 0.4095 | 0.00426456 | 6.95E-23 | | rs437836 | C | T | -0.035 | 0.162 | 0.162 | 0.00574042 | 1.08E-09 | | rs4483850 | T | A | 0.025 | 0.4592 | 0.4592 | 0.00427287 | 4.89E-09 | | rs4561063 | G | T | -0.033 | 0.5447 | 0.4553 | 0.00437618 | 4.67E-14 | | rs4739183 | T | C | -0.027 | 0.3827 | 0.3827 | 0.00448125 | 1.69E-09 | | rs4746113 | A | G | -0.026 | 0.33 | 0.33 | 0.00467908 | 2.75E-08 | | rs4804025 | A | G | -0.044 | 0.6869 | 0.3131 | 0.0047003 | 7.89E-21 | | rs4886869 | G | A | -0.024 | 0.4076 | 0.4076 | 0.00430681 | 2.51E-08 | | rs4945266 | G | A | 0.045 | 0.8231 | 0.1769 | 0.00586471 | 1.68E-14 | | rs4951261 | C | A | -0.025 | 0.5974 | 0.4026 | 0.00432133 | 7.24E-09 | | rs506589 | C | T | -0.069 | 0.1869 | 0.1869 | 0.00534171 | 3.60E-38 | | rs55680968 | G | A | 0.046 | 0.9304 | 0.0696 | 0.00835952 | 3.74E-08 | | rs56289648 | A | G | 0.027 | 0.5318 | 0.4682 | 0.00439129 | 7.82E-10 | | rs5749998 | T | A | -0.027 | 0.4771 | 0.4771 | 0.00420393 | 1.34E-10 | | rs582780 | G | A | -0.025 | 0.6213 | 0.3787 | 0.00451522 | 3.08E-08 | | rs59072247 | T | C | 0.11 | 0.9732 | 0.0268 | 0.013221 | 8.79E-17 | | rs59086897 | A | T | -0.029 | 0.4662 | 0.4662 | 0.00448115 | 9.70E-11 | | rs60021783 | A | T | 0.036 | 0.2396 | 0.2396 | 0.00526646 | 8.16E-12 | | rs60024815 | T | A | -0.031 | 0.7724 | 0.2276 | 0.0050286 | 7.06E-10 | | rs6011149 | A | G | 0.025 | 0.3618 | 0.3618 | 0.00448681 | 2.52E-08 | | rs6027163 | A | G | 0.035 | 0.2396 | 0.2396 | 0.00515053 | 1.08E-11 | | rs610445 | G | C | 0.03 | 0.2406 | 0.2406 | 0.00516664 | 6.38E-09 | | rs61846901 | T | C | -0.027 | 0.6720 | 0.328 | 0.00470763 | 9.73E-09 | | rs6185 | G | C | 0.029 | 0.2425 | 0.2425 | 0.00485748 | 2.37E-09 | | rs62104180 | A | G | 0.11 | 0.0477 | 0.0477 | 0.0115297 | 1.42E-21 | | rs62229372 | T | C | 0.046 | 0.8648 | 0.1352 | 0.00679266 | 1.27E-11 | | rs62316795 | A | C | 0.038 | 0.1730 | 0.173 | 0.00582316 | 6.77E-11 | | rs62379978 | G | T | 0.065 | 0.1660 | 0.166 | 0.00609085 | 1.38E-26 | | rs62414763 | C | G | 0.032 | 0.3260 | 0.326 | 0.00437414 | 2.56E-13 | | rs6478680 | A | G | 0.031 | 0.4811 | 0.4811 | 0.00430334 | 5.86E-13 | | rs6560193 | T | C | 0.024 | 0.4871 | 0.4871 | 0.00419867 | 1.09E-08 | | rs6597884 | C | T | 0.028 | 0.4205 | 0.4205 | 0.00425253 | 4.57E-11 | | rs66752974 | A | C | 0.038 | 0.1581 | 0.1581 | 0.00572779 | 3.26E-11 | | rs6704684 | A | G | 0.071 | 0.1730 | 0.173 | 0.00565576 | 3.80E-36 | | rs67103685 | C | T | -0.032 | 0.2843 | 0.2843 | 0.00516905 | 5.99E-10 | | rs6714523 | A | G | -0.047 | 0.1412 | 0.1412 | 0.00663181 | 1.37E-12 | | rs6864818 | C | T | -0.037 | 0.7744 | 0.2256 | 0.00515077 | 6.80E-13 | | rs6901192 | G | C | -0.038 | 0.7565 | 0.2435 | 0.00520455 | 2.85E-13 | | rs6931884 | T | C | 0.061 | 0.8986 | 0.1014 | 0.00628921 | 3.04E-22 | | rs6933660 | A | C | -0.033 | 0.3310 | 0.331 | 0.00454674 | 3.93E-13 | | rs6968642 | T | C | -0.026 | 0.6123 | 0.3877 | 0.00440177 | 3.49E-09 | | rs7077302 | G | C | -0.05 | 0.0755 | 0.0755 | 0.00786925 | 2.10E-10 | | rs7114175 | T | A | 0.06 | 0.5060 | 0.494 | 0.00419292 | 1.90E-46 | | rs7132908 | A | G | -0.041 | 0.3569 | 0.3569 | 0.00443897 | 2.55E-20 | | rs7144872 | T | C | -0.031 | 0.3191 | 0.3191 | 0.00457611 | 1.25E-11 | | rs7178532 | A | G | 0.048 | 0.6869 | 0.3131 | 0.00461203 | 2.29E-25 | | rs7273470 | C | G | 0.031 | 0.1899 | 0.1899 | 0.00499031 | 5.23E-10 | | rs72768041 | A | T | -0.074 | 0.0199 | 0.0199 | 0.0130784 | 1.53E-08 | | rs72769533 | C | T | 0.043 | 0.1193 | 0.1193 | 0.00649335 | 3.54E-11 | | rs73035994 | C | T | 0.1 | 0.0338 | 0.0338 | 0.0127825 | 5.15E-15 | | rs732898 | A | G | 0.051 | 0.3082 | 0.3082 | 0.00520085 | 1.06E-22 | | rs7359336 | A | G | -0.053 | 0.5755 | 0.4245 | 0.00424791 | 1.00E-35 | | rs7478970 | A | G | -0.032 | 0.1899 | 0.1899 | 0.00528646 | 1.42E-09 | | rs752278 | A | G | -0.04 | 0.5875 | 0.4125 | 0.0043193 | 2.03E-20 | | rs7576624 | T | C | -0.071 | 0.1700 | 0.17 | 0.00559552 | 6.83E-37 | | rs758747 | T | C | -0.029 | 0.7197 | 0.2803 | 0.0048284 | 1.90E-09 | | rs7605368 | A | G | -0.028 | 0.2455 | 0.2455 | 0.00511955 | 4.52E-08 | | rs7628689 | G | A | -0.035 | 0.1581 | 0.1581 | 0.00594939 | 4.03E-09 | | rs7644997 | G | A | -0.046 | 0.0915 | 0.0915 | 0.0073492 | 3.87E-10 | | rs7678293 | G | A | 0.037 | 0.2684 | 0.2684 | 0.00482257 | 1.69E-14 | | rs7719067 | G | A | 0.028 | 0.4414 | 0.4414 | 0.00425685 | 4.78E-11 | | rs77530428 | G | A | 0.12 | 0.9712 | 0.0288 | 0.0180597 | 3.04E-11 | | rs77601667 | C | G | 0.034 | 0.1541 | 0.1541 | 0.00596371 | 1.19E-08 | | rs77848509 | T | G | 0.045 | 0.9175 | 0.0825 | 0.00821947 | 4.38E-08 | | rs7821178 | A | C | -0.042 | 0.328 | 0.328 | 0.0045007 | 1.04E-20 | | rs7852169 | G | C | 0.1 | 0.9205 | 0.0795 | 0.00758969 | 1.21E-39 | | rs7864983 | A | G | -0.032 | 0.3797 | 0.3797 | 0.00444373 | 5.97E-13 | | rs7896371 | T | C | 0.04 | 0.5586 | 0.4414 | 0.00445771 | 2.88E-19 | | rs7924036 | T | G | 0.025 | 0.492 | 0.492 | 0.0043434 | 8.62E-09 | | rs794361 | A | T | 0.027 | 0.5288 | 0.4712 | 0.00443462 | 1.14E-09 | | rs7979001 | A | G | 0.024 | 0.4871 | 0.4871 | 0.00423652 | 1.47E-08 | | rs813301 | T | C | 0.029 | 0.3549 | 0.3549 | 0.00428724 | 1.34E-11 | | rs8136272 | T | A | -0.035 | 0.7485 | 0.2515 | 0.00484819 | 5.23E-13 | | rs845193 | G | A | -0.029 | 0.7485 | 0.2515 | 0.00501354 | 7.28E-09 | | rs852061 | C | A | 0.035 | 0.3817 | 0.3817 | 0.00431182 | 4.77E-16 | | rs913588 | A | G | -0.037 | 0.4751 | 0.4751 | 0.00428467 | 5.85E-18 | | rs928593 | C | T | 0.039 | 0.1093 | 0.1093 | 0.00702728 | 2.86E-08 | | rs9349203 | A | G | -0.037 | 0.5427 | 0.4573 | 0.0042133 | 1.61E-18 | | rs9376867 | A | G | -0.034 | 0.3012 | 0.3012 | 0.00482113 | 1.76E-12 | | rs9426832 | G | A | -0.026 | 0.5199 | 0.4801 | 0.00427893 | 1.23E-09 | | rs9475046 | C | G | 0.035 | 0.4592 | 0.4592 | 0.00421039 | 9.35E-17 | | rs9497905 | A | C | 0.031 | 0.2087 | 0.2087 | 0.00510718 | 1.28E-09 | | rs9522262 | G | C | -0.041 | 0.4801 | 0.4801 | 0.00444095 | 2.65E-20 | | rs953230 | A | G | 0.036 | 0.6809 | 0.3191 | 0.00476644 | 4.26E-14 | | rs9548873 | T | C | -0.031 | 0.3300 | 0.33 | 0.00443591 | 2.78E-12 | | rs9568123 | G | A | 0.033 | 0.8509 | 0.1491 | 0.00591511 | 2.42E-08 | | rs9635759 | A | G | 0.059 | 0.2952 | 0.2952 | 0.00463717 | 4.39E-37 | | rs9647570 | G | T | 0.037 | 0.1332 | 0.1332 | 0.006117 | 1.46E-09 | | rs970953 | C | T | 0.029 | 0.2704 | 0.2704 | 0.00489086 | 3.04E-09 | | rs9758500 | G | A | 0.045 | 0.4085 | 0.4085 | 0.00443571 | 3.49E-24 | | rs9858924 | A | C | -0.029 | 0.3529 | 0.3529 | 0.00455373 | 1.91E-10 | |
| --- | --- | --- | --- | --- | --- | --- | --- | --- | --- | --- | --- | --- | --- | --- | --- | --- | --- | --- | --- | --- | --- | --- | --- | --- | --- | --- | --- | --- | --- | --- | --- | --- | --- | --- | --- | --- | --- | --- | --- | --- | --- | --- | --- | --- | --- | --- | --- | --- | --- | --- | --- | --- | --- | --- | --- | --- | --- | --- | --- | --- | --- | --- | --- | --- | --- | --- | --- | --- | --- | --- | --- | --- | --- | --- | --- | --- | --- | --- | --- | --- | --- | --- | --- | --- | --- | --- | --- | --- | --- | --- | --- | --- | --- | --- | --- | --- | --- | --- | --- | --- | --- | --- | --- | --- | --- | --- | --- | --- | --- | --- | --- | --- | --- | --- | --- | --- | --- | --- | --- | --- | --- | --- | --- | --- | --- | --- | --- | --- | --- | --- | --- | --- | --- | --- | --- | --- | --- | --- | --- | --- | --- | --- | --- | --- | --- | --- | --- | --- | --- | --- | --- | --- | --- | --- | --- | --- | --- | --- | --- | --- | --- | --- | --- | --- | --- | --- | --- | --- | --- | --- | --- | --- | --- | --- | --- | --- | --- | --- | --- | --- | --- | --- | --- | --- | --- | --- | --- | --- | --- | --- | --- | --- | --- | --- | --- | --- | --- | --- | --- | --- | --- | --- | --- | --- | --- | --- | --- | --- | --- | --- | --- | --- | --- | --- | --- | --- | --- | --- | --- | --- | --- | --- | --- | --- | --- | --- | --- | --- | --- | --- | --- | --- | --- | --- | --- | --- | --- | --- | --- | --- | --- | --- | --- | --- | --- | --- | --- | --- | --- | --- | --- | --- | --- | --- | --- | --- | --- | --- | --- | --- | --- | --- | --- | --- | --- | --- | --- | --- | --- | --- | --- | --- | --- | --- | --- | --- | --- | --- | --- | --- | --- | --- | --- | --- | --- | --- | --- | --- | --- | --- | --- | --- | --- | --- | --- | --- | --- | --- | --- | --- | --- | --- | --- | --- | --- | --- | --- | --- | --- | --- | --- | --- | --- | --- | --- | --- | --- | --- | --- | --- | --- | --- | --- | --- | --- | --- | --- | --- | --- | --- | --- | --- | --- | --- | --- | --- | --- | --- | --- | --- | --- | --- | --- | --- | --- | --- | --- | --- | --- | --- | --- | --- | --- | --- | --- | --- | --- | --- | --- | --- | --- | --- | --- | --- | --- | --- | --- | --- | --- | --- | --- | --- | --- | --- | --- | --- | --- | --- | --- | --- | --- | --- | --- | --- | --- | --- | --- | --- | --- | --- | --- | --- | --- | --- | --- | --- | --- | --- | --- | --- | --- | --- | --- | --- | --- | --- | --- | --- | --- | --- | --- | --- | --- | --- | --- | --- | --- | --- | --- | --- | --- | --- | --- | --- | --- | --- | --- | --- | --- | --- | --- | --- | --- | --- | --- | --- | --- | --- | --- | --- | --- | --- | --- | --- | --- | --- | --- | --- | --- | --- | --- | --- | --- | --- | --- | --- | --- | --- | --- | --- | --- | --- | --- | --- | --- | --- | --- | --- | --- | --- | --- | --- | --- | --- | --- | --- | --- | --- | --- | --- | --- | --- | --- | --- | --- | --- | --- | --- | --- | --- | --- | --- | --- | --- | --- | --- | --- | --- | --- | --- | --- | --- | --- | --- | --- | --- | --- | --- | --- | --- | --- | --- | --- | --- | --- | --- | --- | --- | --- | --- | --- | --- | --- | --- | --- | --- | --- | --- | --- | --- | --- | --- | --- | --- | --- | --- | --- | --- | --- | --- | --- | --- | --- | --- | --- | --- | --- | --- | --- | --- | --- | --- | --- | --- | --- | --- | --- | --- | --- | --- | --- | --- | --- | --- | --- | --- | --- | --- | --- | --- | --- | --- | --- | --- | --- | --- | --- | --- | --- | --- | --- | --- | --- | --- | --- | --- | --- | --- | --- | --- | --- | --- | --- | --- | --- | --- | --- | --- | --- | --- | --- | --- | --- | --- | --- | --- | --- | --- | --- | --- | --- | --- | --- | --- | --- | --- | --- | --- | --- | --- | --- | --- | --- | --- | --- | --- | --- | --- | --- | --- | --- | --- | --- | --- | --- | --- | --- | --- | --- | --- | --- | --- | --- | --- | --- | --- | --- | --- | --- | --- | --- | --- | --- | --- | --- | --- | --- | --- | --- | --- | --- | --- | --- | --- | --- | --- | --- | --- | --- | --- | --- | --- | --- | --- | --- | --- | --- | --- | --- | --- | --- | --- | --- | --- | --- | --- | --- | --- | --- | --- | --- | --- | --- | --- | --- | --- | --- | --- | --- | --- | --- | --- | --- | --- | --- | --- | --- | --- | --- | --- | --- | --- | --- | --- | --- | --- | --- | --- | --- | --- | --- | --- | --- | --- | --- | --- | --- | --- | --- | --- | --- | --- | --- | --- | --- | --- | --- | --- | --- | --- | --- | --- | --- | --- | --- | --- | --- | --- | --- | --- | --- | --- | --- | --- | --- | --- | --- | --- | --- | --- | --- | --- | --- | --- | --- | --- | --- | --- | --- | --- | --- | --- | --- | --- | --- | --- | --- | --- | --- | --- | --- | --- | --- | --- | --- | --- | --- | --- | --- | --- | --- | --- | --- | --- | --- | --- | --- | --- | --- | --- | --- | --- | --- | --- | --- | --- | --- | --- | --- | --- | --- | --- | --- | --- | --- | --- | --- | --- | --- | --- | --- | --- | --- | --- | --- | --- | --- | --- | --- | --- | --- | --- | --- | --- | --- | --- | --- | --- | --- | --- | --- | --- | --- | --- | --- | --- | --- | --- | --- | --- | --- | --- | --- | --- | --- | --- | --- | --- | --- | --- | --- | --- | --- | --- | --- | --- | --- | --- | --- | --- | --- | --- | --- | --- | --- | --- | --- | --- | --- | --- | --- | --- | --- | --- | --- | --- | --- | --- | --- | --- | --- | --- | --- | --- | --- | --- | --- | --- | --- | --- | --- | --- | --- | --- | --- | --- | --- | --- | --- | --- | --- | --- | --- | --- | --- | --- | --- | --- | --- | --- | --- | --- | --- | --- | --- | --- | --- | --- | --- | --- | --- | --- | --- | --- | --- | --- | --- | --- | --- | --- | --- | --- | --- | --- | --- | --- | --- | --- | --- | --- | --- | --- | --- | --- | --- | --- | --- | --- | --- | --- | --- | --- | --- | --- | --- | --- | --- | --- | --- | --- | --- | --- | --- | --- | --- | --- | --- | --- | --- | --- | --- | --- | --- | --- | --- | --- | --- | --- | --- | --- | --- | --- | --- | --- | --- | --- | --- | --- | --- | --- | --- | --- | --- | --- | --- | --- | --- | --- | --- | --- | --- | --- | --- | --- | --- | --- | --- | --- | --- | --- | --- | --- | --- | --- | --- | --- | --- | --- | --- | --- | --- | --- | --- | --- | --- | --- | --- | --- | --- | --- | --- | --- | --- | --- | --- | --- | --- | --- | --- | --- | --- | --- | --- | --- | --- | --- | --- | --- | --- | --- | --- | --- | --- | --- | --- | --- | --- | --- | --- | --- | --- | --- | --- | --- | --- | --- | --- | --- | --- | --- | --- | --- | --- | --- | --- | --- | --- | --- | --- | --- | --- | --- | --- | --- | --- | --- | --- | --- | --- | --- | --- | --- | --- | --- | --- | --- | --- | --- | --- | --- | --- | --- | --- | --- | --- | --- | --- | --- | --- | --- | --- | --- | --- | --- | --- | --- | --- | --- | --- | --- | --- | --- | --- | --- | --- | --- | --- | --- | --- | --- | --- | --- | --- | --- | --- | --- | --- | --- | --- | --- | --- | --- | --- | --- | --- | --- | --- | --- | --- | --- | --- | --- | --- | --- | --- | --- | --- | --- | --- | --- | --- | --- | --- | --- | --- | --- | --- | --- | --- | --- | --- | --- | --- | --- | --- | --- | --- | --- | --- | --- | --- | --- | --- | --- | --- | --- | --- | --- | --- | --- | --- | --- | --- | --- | --- | --- | --- | --- | --- | --- | --- | --- | --- | --- | --- | --- | --- | --- | --- | --- | --- | --- | --- | --- | --- | --- | --- | --- | --- | --- | --- | --- | --- | --- | --- | --- | --- | --- | --- | --- | --- | --- | --- | --- | --- | --- | --- | --- | --- | --- | --- | --- | --- | --- | --- | --- | --- | --- | --- | --- | --- | --- | --- | --- | --- | --- | --- | --- | --- | --- | --- | --- | --- | --- | --- | --- | --- | --- | --- | --- | --- | --- | --- | --- | --- | --- | --- | --- | --- | --- | --- | --- | --- | --- | --- | --- | --- | --- | --- | --- | --- | --- | --- | --- | --- | --- | --- | --- | --- | --- | --- | --- | --- | --- | --- | --- | --- | --- | --- | --- | --- | --- | --- | --- | --- | --- | --- | --- | --- | --- | --- | --- | --- | --- | --- | --- | --- | --- | --- | --- | --- | --- | --- | --- | --- | --- | --- | --- | --- | --- | --- | --- | --- | --- | --- | --- | --- | --- | --- | --- | --- | --- | --- | --- | --- | --- | --- | --- | --- | --- | --- | --- | --- | --- | --- | --- | --- | --- | --- | --- | --- | --- | --- | --- | --- | --- | --- | --- | --- | --- | --- | --- | --- | --- | --- | --- | --- | --- | --- | --- | --- | --- | --- | --- | --- | --- | --- | --- | --- | --- | --- | --- | --- | --- | --- | --- | --- | --- | --- | --- | --- | --- | --- | --- | --- | --- | --- | --- | --- | --- | --- | --- | --- | --- | --- | --- | --- | --- | --- | --- | --- | --- | --- | --- | --- | --- | --- | --- | --- | --- | --- | --- | --- | --- | --- | --- | --- | --- | --- | --- | --- | --- | --- | --- | --- | --- | --- | --- | --- | --- | --- | --- | --- | --- | --- | --- | --- | --- | --- | --- | --- | --- | --- | --- | --- | --- | --- | --- | --- | --- | --- | --- | --- | --- | --- | --- | --- | --- | --- | --- | --- | --- | --- | --- | --- | --- | --- | --- | --- | --- | --- | --- | --- | --- | --- | --- | --- | --- | --- | --- | --- | --- | --- | --- | --- | --- | --- | --- | --- | --- | --- | --- | --- | --- | --- | --- | --- | --- | --- | --- | --- | --- | --- | --- | --- | --- | --- | --- | --- | --- | --- | --- |

a The variants together explain 1.6% of the variation in Age At Menarche (Female) (R2 = 0.016; F (TOTAL) = 20.918).

b Increase in Age At Menarche (Female) in per effect allele.

c Effect Allele Frequency

d Minor Allele Frequency

| Characteristics of the single nucleotide polymorphisms (SNP) used as instrumental variables for Sleep Durationa   | SNP | Effect Allele | Other Allele | Effect (BETA)b | EAFc | MAFd | Standard Error | P-Value | | --- | --- | --- | --- | --- | --- | --- | --- | | rs1380703 | G | A | -0.0247612 | 0.381669 | 0.381669 | 0.00428596 | 7.60E-09 | | rs17190618 | T | A | 0.0328679 | 0.159737 | 0.159737 | 0.00540232 | 1.20E-09 | | rs62158211 | T | G | 0.0391606 | 0.213374 | 0.213374 | 0.00483774 | 5.70E-16 | |
| --- | --- | --- | --- | --- | --- | --- | --- | --- | --- | --- | --- | --- | --- | --- | --- | --- | --- | --- | --- | --- | --- | --- | --- | --- | --- | --- | --- | --- | --- | --- | --- | --- |

a The variants together explain 0.5% of the variation in Sleep Duration (R2 = 0.005; F (TOTAL) = 212.615).

b Increase in Sleep Duration in per effect allele.

c Effect Allele Frequency

d Minor Allele Frequency

| Characteristics of the single nucleotide polymorphisms (SNP) used as instrumental variables for Cigarettes Per Daya |
| --- |

| SNP | Effect Allele | Other Allele | Effect (BETA)b | EAFc | MAFd | Standard Error | P-Value |
| --- | --- | --- | --- | --- | --- | --- | --- |
| rs11725618 | C | T | 0.036064 | 0.287 | 0.287 | 0.00615782 | 4.67E-09 |
| rs1579233 | G | A | -0.0318201 | 0.571 | 0.429 | 0.00556452 | 1.07E-08 |
| rs2072659 | G | C | -0.0652518 | 0.105 | 0.105 | 0.00924651 | 1.71E-12 |
| rs2084533 | T | C | 0.0336406 | 0.319 | 0.319 | 0.00590094 | 1.22E-08 |
| rs215600 | A | G | -0.0492503 | 0.64 | 0.36 | 0.0057525 | 1.10E-17 |
| rs2273500 | C | T | 0.0680938 | 0.159 | 0.159 | 0.00779553 | 2.47E-18 |
| rs2424888 | A | G | 0.0334848 | 0.405 | 0.405 | 0.00563586 | 2.76E-09 |
| rs3025383 | C | T | -0.0578394 | 0.18 | 0.18 | 0.00704521 | 2.22E-16 |
| rs34406232 | A | C | -0.146992 | 0.0259 | 0.0259 | 0.0166972 | 1.33E-18 |
| rs4785587 | A | G | -0.0336223 | 0.511 | 0.489 | 0.00553496 | 1.27E-09 |
| rs56113850 | C | T | 0.107205 | 0.568 | 0.432 | 0.00560367 | 1.10E-81 |
| rs58379124 | C | T | 0.0669394 | 0.748 | 0.252 | 0.00650172 | 9.00E-25 |
| rs632811 | G | A | -0.0367137 | 0.351 | 0.351 | 0.00641049 | 1.03E-08 |
| rs73229090 | A | C | 0.0554895 | 0.113 | 0.113 | 0.00876271 | 2.44E-10 |
| rs7431710 | A | G | -0.0349579 | 0.644 | 0.356 | 0.0058102 | 1.82E-09 |
| rs75494138 | T | C | 0.0598763 | 0.0618 | 0.0618 | 0.0105682 | 1.45E-08 |
| rs787362 | A | T | 0.0304766 | 0.452 | 0.452 | 0.00557353 | 4.50E-08 |
| rs790564 | C | A | -0.0408927 | 0.719 | 0.281 | 0.00619302 | 3.97E-11 |
| rs7928017 | A | C | -0.0329314 | 0.413 | 0.413 | 0.00555848 | 3.14E-09 |
| rs7951365 | C | T | 0.0389511 | 0.306 | 0.306 | 0.00596781 | 6.63E-11 |
| rs8034191 | C | T | 0.182567 | 0.328 | 0.328 | 0.00588925 | 1.00E-200 |
| rs806798 | C | T | -0.0308507 | 0.543 | 0.457 | 0.00553204 | 2.48E-08 |
| rs895330 | G | C | -0.0390041 | 0.206 | 0.206 | 0.00701668 | 2.68E-08 |

a The variants together explain 2.6% of the variation in Cigarettes Per Day (R2 = 0.026; F (TOTAL) = 381.307).

b Increase in Cigarettes Per Day in per effect allele.

c Effect Allele Frequency

d Minor Allele Frequency

| Characteristics of the single nucleotide polymorphisms (SNP) used as instrumental variables for Age of smoking initiationa | | | | | | | |
| --- | --- | --- | --- | --- | --- | --- | --- |
| SNP | Effect Allele | Other Allele | Effect (BETA)b | EAFc | MAFd | Standard Error | P-Value |
| rs10200107 | A | G | -0.0195583 | 0.558 | 0.442 | 0.00277709 | 1.84E-12 |
| rs11780471 | A | G | 0.0378504 | 0.0644 | 0.0644 | 0.00580598 | 7.00E-11 |
| rs11915747 | G | C | 0.0209896 | 0.354 | 0.354 | 0.00289134 | 3.83E-13 |
| rs140485736 | A | G | 0.0654532 | 0.0131 | 0.0131 | 0.0115346 | 1.41E-08 |
| rs319748 | A | G | -0.0170339 | 0.711 | 0.289 | 0.0030743 | 3.08E-08 |
| rs3768886 | C | G | 0.0171402 | 0.328 | 0.328 | 0.00296581 | 7.37E-09 |
| rs624833 | G | T | 0.0172945 | 0.309 | 0.309 | 0.00300603 | 8.61E-09 |

a The variants together explain 0.6% of the variation in Age of smoking initiation (R2 = 0.006; F (TOTAL) = 292.645).

b Increase in Age of smoking initiation in per effect allele.

c Effect Allele Frequency

d Minor Allele Frequency

| Characteristics of the single nucleotide polymorphisms (SNP) used as instrumental variables for Alcohol Consumptiona   | SNP | Effect Allele | Other Allele | Effect (BETA)b | EAFc | MAFd | Standard Error | P-Value | | --- | --- | --- | --- | --- | --- | --- | --- | | rs115616389 | T | C | -0.3463 | 0.9771 | 0.0229 | 0.0597 | 6.46E-09 | | rs11577305 | G | C | -0.1701 | 0.9145 | 0.0855 | 0.0306 | 2.75E-08 | | rs116917149 | A | C | -0.2477 | 0.0408 | 0.0408 | 0.0423 | 4.81E-09 | | rs138546517 | T | C | -0.3629 | 0.9871 | 0.0129 | 0.0647 | 2.06E-08 | | rs142080835 | G | A | -0.3252 | 0.9871 | 0.0129 | 0.0561 | 6.85E-09 | | rs142896482 | G | A | -0.299 | 0.9871 | 0.0129 | 0.0516 | 6.66E-09 | | rs77089642 | A | G | -0.2519 | 0.0209 | 0.0209 | 0.046 | 4.44E-08 | |
| --- | --- | --- | --- | --- | --- | --- | --- | --- | --- | --- | --- | --- | --- | --- | --- | --- | --- | --- | --- | --- | --- | --- | --- | --- | --- | --- | --- | --- | --- | --- | --- | --- | --- | --- | --- | --- | --- | --- | --- | --- | --- | --- | --- | --- | --- | --- | --- | --- | --- | --- | --- | --- | --- | --- | --- | --- | --- | --- | --- | --- | --- | --- | --- | --- |

a The variants together explain 0.7% of the variation in Alcohol Consumption (R2 = 0.007; F (TOTAL) = 83.618).

b Increase in Alcohol Consumption in per effect allele.

c Effect Allele Frequency

d Minor Allele Frequency

| Characteristics of the single nucleotide polymorphisms (SNP) used as instrumental variables for Coffee Intakea   | SNP | Effect  Allele | Other  Allele | Effect (BETA)b | EAFc | MAFd | Standard Error | P-Value | | --- | --- | --- | --- | --- | --- | --- | --- | | rs10119174 | C | G | -0.00939786 | 0.571035 | 0.428965 | 0.00164159 | 1.00E-08 | | rs1057868 | T | C | 0.0199509 | 0.284986 | 0.284986 | 0.00178517 | 5.40E-29 | | rs117810762 | A | G | 0.0359086 | 0.017881 | 0.017881 | 0.00617871 | 6.20E-09 | | rs117968677 | A | G | -0.0310299 | 0.024207 | 0.024207 | 0.00551601 | 1.90E-08 | | rs12514566 | A | G | -0.0113972 | 0.337107 | 0.337107 | 0.00170562 | 2.40E-11 | | rs12989746 | T | G | 0.01035 | 0.249928 | 0.249928 | 0.00186429 | 2.80E-08 | | rs13054099 | C | T | -0.0107777 | 0.261004 | 0.261004 | 0.00183597 | 4.30E-09 | | rs13163336 | A | C | 0.0149472 | 0.15761 | 0.15761 | 0.00221005 | 1.30E-11 | | rs1338549 | G | T | -0.00945121 | 0.533932 | 0.466068 | 0.0016218 | 5.60E-09 | | rs13387939 | A | C | 0.0165558 | 0.828363 | 0.171637 | 0.0021386 | 9.80E-15 | | rs1421085 | C | T | 0.0185426 | 0.40357 | 0.40357 | 0.00164436 | 1.70E-29 | | rs1527961 | C | T | -0.0133431 | 0.1349 | 0.1349 | 0.00236585 | 1.70E-08 | | rs17842490 | G | A | -0.0451683 | 0.014248 | 0.014248 | 0.00680848 | 3.30E-11 | | rs1942965 | C | T | -0.00890339 | 0.504585 | 0.495415 | 0.00161917 | 3.80E-08 | | rs2189234 | G | T | 0.00998689 | 0.617795 | 0.382205 | 0.00166052 | 1.80E-09 | | rs2465037 | A | C | -0.0106317 | 0.343017 | 0.343017 | 0.00170743 | 4.80E-10 | | rs2472297 | T | C | 0.0464708 | 0.262883 | 0.262883 | 0.00182733 | 1.10E-142 | | rs2597805 | T | C | 0.00985502 | 0.682463 | 0.317537 | 0.00175623 | 2.00E-08 | | rs34060476 | G | A | 0.0184292 | 0.133855 | 0.133855 | 0.00237033 | 7.50E-15 | | rs4410790 | C | T | 0.039072 | 0.632141 | 0.367859 | 0.00167288 | 1.20E-120 | | rs442355 | C | G | -0.0111372 | 0.254435 | 0.254435 | 0.00185374 | 1.90E-09 | | rs4615895 | A | G | 0.0122025 | 0.740926 | 0.259074 | 0.00184972 | 4.20E-11 | | rs476828 | C | T | 0.0173461 | 0.237409 | 0.237409 | 0.00189543 | 5.60E-20 | | rs516636 | A | C | 0.0116767 | 0.208913 | 0.208913 | 0.00198419 | 4.00E-09 | | rs56113850 | C | T | 0.0126667 | 0.578109 | 0.421891 | 0.00163351 | 8.90E-15 | | rs57918684 | A | G | 0.0128864 | 0.154747 | 0.154747 | 0.00223845 | 8.60E-09 | | rs6062682 | T | C | 0.0103704 | 0.464546 | 0.464546 | 0.00163929 | 2.50E-10 | | rs6063085 | C | A | 0.0104106 | 0.373473 | 0.373473 | 0.00166919 | 4.50E-10 | | rs61928609 | C | A | -0.0147305 | 0.835328 | 0.164672 | 0.00217536 | 1.30E-11 | | rs62064918 | T | C | -0.0103075 | 0.244545 | 0.244545 | 0.00187872 | 4.10E-08 | | rs630194 | C | T | -0.0113533 | 0.343374 | 0.343374 | 0.00169853 | 2.30E-11 | | rs6469262 | C | T | -0.00915347 | 0.564966 | 0.435034 | 0.00162895 | 1.90E-08 | | rs7224815 | T | A | -0.0108602 | 0.407832 | 0.407832 | 0.00164162 | 3.70E-11 | | rs73075167 | T | A | -0.0160639 | 0.12918 | 0.12918 | 0.00244429 | 5.00E-11 | | rs75347775 | A | G | 0.0104504 | 0.244531 | 0.244531 | 0.00187898 | 2.70E-08 | | rs780093 | C | T | 0.0132935 | 0.615839 | 0.384161 | 0.00165695 | 1.00E-15 | | rs7811609 | T | C | 0.00913864 | 0.374746 | 0.374746 | 0.00166468 | 4.00E-08 | | rs78267637 | G | C | -0.0254259 | 0.038115 | 0.038115 | 0.00431659 | 3.90E-09 | | rs8056750 | T | C | 0.0105333 | 0.359129 | 0.359129 | 0.00173692 | 1.30E-09 | | rs9398171 | T | C | 0.0108577 | 0.71064 | 0.28936 | 0.00177995 | 1.10E-09 | |
| --- | --- | --- | --- | --- | --- | --- | --- | --- | --- | --- | --- | --- | --- | --- | --- | --- | --- | --- | --- | --- | --- | --- | --- | --- | --- | --- | --- | --- | --- | --- | --- | --- | --- | --- | --- | --- | --- | --- | --- | --- | --- | --- | --- | --- | --- | --- | --- | --- | --- | --- | --- | --- | --- | --- | --- | --- | --- | --- | --- | --- | --- | --- | --- | --- | --- | --- | --- | --- | --- | --- | --- | --- | --- | --- | --- | --- | --- | --- | --- | --- | --- | --- | --- | --- | --- | --- | --- | --- | --- | --- | --- | --- | --- | --- | --- | --- | --- | --- | --- | --- | --- | --- | --- | --- | --- | --- | --- | --- | --- | --- | --- | --- | --- | --- | --- | --- | --- | --- | --- | --- | --- | --- | --- | --- | --- | --- | --- | --- | --- | --- | --- | --- | --- | --- | --- | --- | --- | --- | --- | --- | --- | --- | --- | --- | --- | --- | --- | --- | --- | --- | --- | --- | --- | --- | --- | --- | --- | --- | --- | --- | --- | --- | --- | --- | --- | --- | --- | --- | --- | --- | --- | --- | --- | --- | --- | --- | --- | --- | --- | --- | --- | --- | --- | --- | --- | --- | --- | --- | --- | --- | --- | --- | --- | --- | --- | --- | --- | --- | --- | --- | --- | --- | --- | --- | --- | --- | --- | --- | --- | --- | --- | --- | --- | --- | --- | --- | --- | --- | --- | --- | --- | --- | --- | --- | --- | --- | --- | --- | --- | --- | --- | --- | --- | --- | --- | --- | --- | --- | --- | --- | --- | --- | --- | --- | --- | --- | --- | --- | --- | --- | --- | --- | --- | --- | --- | --- | --- | --- | --- | --- | --- | --- | --- | --- | --- | --- | --- | --- | --- | --- | --- | --- | --- | --- | --- | --- | --- | --- | --- | --- | --- | --- | --- | --- | --- | --- | --- | --- | --- | --- | --- | --- | --- | --- | --- | --- | --- | --- | --- | --- | --- | --- | --- | --- | --- | --- | --- | --- | --- | --- | --- | --- | --- | --- | --- | --- | --- | --- | --- | --- | --- | --- | --- | --- | --- | --- | --- | --- |

a The variants together explain 6.4% of the variation in Coffee Intake (R2 = 0.064; F (TOTAL) = 727.148)

b Increase in Coffee Intake in per effect allele

c Effect Allele Frequency

d Minor Allele Frequency

| Characteristics of the single nucleotide polymorphisms (SNP) used as instrumental variables for Basal Cell Carcinomaa | | | | | | | |
| --- | --- | --- | --- | --- | --- | --- | --- |
| SNP | Effect Allele | Other Allele | Effect (BETA)b | EAFc | MAFd | Standard Error | P-Value |
| rs10216564 | C | T | -0.320739 | 0.0634699 | 0.0634699 | 0.0252889 | 7.30E-37 |
| rs10962474 | T | C | -0.257552 | 0.0530924 | 0.0530924 | 0.0269392 | 1.20E-21 |
| rs11170164 | T | C | 0.195154 | 0.0781363 | 0.0781363 | 0.0187715 | 2.60E-25 |
| rs1126809 | A | G | 0.13852 | 0.303865 | 0.303865 | 0.0115703 | 5.00E-33 |
| rs11669443 | A | G | 0.0757473 | 0.23506 | 0.23506 | 0.0125781 | 1.70E-09 |
| rs11708920 | T | G | 0.122259 | 0.478948 | 0.478948 | 0.0108921 | 3.10E-29 |
| rs117744081 | G | A | -0.246335 | 0.032237 | 0.032237 | 0.0340917 | 5.00E-13 |
| rs11908416 | A | G | -0.107576 | 0.240924 | 0.240924 | 0.0131082 | 2.30E-16 |
| rs12576996 | G | T | -0.0833156 | 0.244402 | 0.244402 | 0.0129954 | 1.40E-10 |
| rs12718245 | C | T | -0.0647231 | 0.421538 | 0.421538 | 0.0110392 | 4.50E-09 |
| rs13043023 | C | T | -0.163241 | 0.096673 | 0.096673 | 0.0196051 | 8.30E-17 |
| rs157934 | C | T | -0.112764 | 0.304587 | 0.304587 | 0.0120356 | 7.30E-21 |
| rs162298 | A | G | 0.090165 | 0.248515 | 0.248515 | 0.0122627 | 1.90E-13 |
| rs16891982 | G | C | 0.414833 | 0.97544 | 0.02456 | 0.0419163 | 4.30E-23 |
| rs1800440 | C | T | -0.0994024 | 0.186205 | 0.186205 | 0.0143244 | 3.90E-12 |
| rs2049218 | T | C | 0.074451 | 0.451398 | 0.451398 | 0.0109268 | 9.50E-12 |
| rs214803 | A | C | -0.216168 | 0.820407 | 0.179593 | 0.0132764 | 1.30E-59 |
| rs2153271 | T | C | 0.0787498 | 0.612466 | 0.387534 | 0.0112212 | 2.30E-12 |
| rs2241260 | G | A | -0.067307 | 0.312488 | 0.312488 | 0.0120152 | 2.10E-08 |
| rs2849699 | G | C | -0.105488 | 0.317945 | 0.317945 | 0.0119379 | 9.90E-19 |
| rs28732208 | T | C | 0.0988894 | 0.16419 | 0.16419 | 0.0141859 | 3.10E-12 |
| rs2882274 | C | T | 0.0623487 | 0.515507 | 0.484493 | 0.0110052 | 1.50E-08 |
| rs28884287 | T | C | -0.193279 | 0.154482 | 0.154482 | 0.0159708 | 1.00E-33 |
| rs3087243 | A | G | 0.095218 | 0.450314 | 0.450314 | 0.0108703 | 2.00E-18 |
| rs340797 | T | G | -0.198575 | 0.104908 | 0.104908 | 0.0190209 | 1.60E-25 |
| rs35749174 | A | G | 0.28426 | 0.0997849 | 0.0997849 | 0.0163677 | 1.50E-67 |
| rs3769818 | G | A | -0.170512 | 0.732167 | 0.267833 | 0.0118603 | 7.20E-47 |
| rs3778607 | G | A | 0.0990214 | 0.547718 | 0.452282 | 0.0109869 | 2.00E-19 |
| rs380286 | A | G | -0.160712 | 0.436629 | 0.436629 | 0.0110587 | 7.50E-48 |
| rs3818625 | A | G | 0.0654257 | 0.550882 | 0.449118 | 0.0109394 | 2.20E-09 |
| rs41271951 | G | A | 0.110875 | 0.084459 | 0.084459 | 0.0186855 | 3.00E-09 |
| rs42905 | C | A | -0.0616434 | 0.544955 | 0.455045 | 0.0109629 | 1.90E-08 |
| rs4682103 | G | A | 0.0622965 | 0.528636 | 0.471364 | 0.0109067 | 1.10E-08 |
| rs55775505 | T | C | 0.0991403 | 0.313859 | 0.313859 | 0.0115433 | 8.80E-18 |
| rs55942834 | G | A | -0.118117 | 0.193106 | 0.193106 | 0.0142484 | 1.10E-16 |
| rs6059655 | G | A | -0.236755 | 0.899312 | 0.100688 | 0.0167559 | 2.50E-45 |
| rs6513599 | T | C | 0.0603503 | 0.432732 | 0.432732 | 0.0110628 | 4.90E-08 |
| rs663743 | A | G | 0.0685964 | 0.340422 | 0.340422 | 0.0113736 | 1.60E-09 |
| rs6679677 | A | C | -0.116299 | 0.101513 | 0.101513 | 0.0187153 | 5.20E-10 |
| rs6707137 | A | G | -0.23274 | 0.0618645 | 0.0618645 | 0.0247468 | 5.20E-21 |
| rs7027950 | T | C | -0.120776 | 0.474682 | 0.474682 | 0.0109257 | 2.10E-28 |
| rs72928038 | A | G | -0.123502 | 0.179729 | 0.179729 | 0.0146433 | 3.30E-17 |
| rs730153 | A | G | 0.182102 | 0.362745 | 0.362745 | 0.0110736 | 9.20E-61 |
| rs74415461 | T | C | 0.134057 | 0.0849787 | 0.0849787 | 0.0185591 | 5.10E-13 |
| rs74623270 | A | G | -0.253859 | 0.115686 | 0.115686 | 0.0185932 | 1.90E-42 |
| rs76128631 | T | G | 0.0738571 | 0.209867 | 0.209867 | 0.0132209 | 2.30E-08 |
| rs7705526 | A | C | 0.0825872 | 0.321483 | 0.321483 | 0.0117546 | 2.10E-12 |
| rs78227582 | T | G | -0.109215 | 0.247444 | 0.247444 | 0.0130157 | 4.80E-17 |
| rs78378222 | G | T | 0.450949 | 0.0112281 | 0.0112281 | 0.0420685 | 8.30E-27 |
| rs79522206 | A | G | 0.249044 | 0.0264336 | 0.0264336 | 0.0303076 | 2.10E-16 |
| rs801108 | G | C | 0.214705 | 0.246169 | 0.246169 | 0.0120001 | 1.40E-71 |
| rs834603 | G | A | -0.061821 | 0.493218 | 0.493218 | 0.0108746 | 1.30E-08 |
| rs854807 | A | G | 0.0618578 | 0.426369 | 0.426369 | 0.0109468 | 1.60E-08 |
| rs909223 | G | A | -0.0647101 | 0.444782 | 0.444782 | 0.0109656 | 3.60E-09 |
| rs9272451 | G | C | -0.106711 | 0.386296 | 0.386296 | 0.0113082 | 3.90E-21 |
| rs9392026 | A | G | -0.110216 | 0.591543 | 0.408457 | 0.0109941 | 1.20E-23 |
| rs950039 | A | G | 0.0816846 | 0.718755 | 0.281245 | 0.0125599 | 7.80E-11 |

a The variants together explain 5.6% of the variation in Basal Cell Carcinoma (R2 = 0.056; F (TOTAL) = 407.981)

b Increase in odds of Basal Cell Carcinoma in per effect allele

c Effect Allele Frequency

d Minor Allele Frequency

| Characteristics of the single nucleotide polymorphisms (SNP) used as instrumental variables for Melanoma Skin Cancera   | SNP | Effect Allele | Other Allele | Effect (BETA)b | EAFc | MAFd | Standard Error | P-Value | | --- | --- | --- | --- | --- | --- | --- | --- | | rs11120349 | T | A | -0.00165893 | 0.20584 | 0.20584 | 0.000285342 | 6.10E-09 | | rs1126809 | A | G | 0.00203828 | 0.302059 | 0.302059 | 0.000250011 | 3.60E-16 | | rs12278954 | A | C | -0.00181256 | 0.15327 | 0.15327 | 0.000318844 | 1.30E-08 | | rs16891982 | G | C | 0.00524246 | 0.971432 | 0.028568 | 0.000675022 | 8.10E-15 | | rs1805007 | T | C | 0.00573628 | 0.101025 | 0.101025 | 0.000379069 | 9.90E-52 | | rs183783391 | T | C | 0.00693872 | 0.013683 | 0.013683 | 0.0010097 | 6.30E-12 | | rs2488002 | T | C | -0.00194568 | 0.843575 | 0.156425 | 0.000315145 | 6.70E-10 | | rs31490 | A | G | 0.00182957 | 0.435464 | 0.435464 | 0.00023138 | 2.60E-15 | | rs6059655 | G | A | -0.00383327 | 0.898713 | 0.101287 | 0.000386784 | 3.70E-23 | | rs74415461 | T | C | 0.00387347 | 0.084956 | 0.084956 | 0.000413323 | 7.10E-21 | | rs871024 | A | C | -0.00189312 | 0.519167 | 0.480833 | 0.000229871 | 1.80E-16 | |
| --- | --- | --- | --- | --- | --- | --- | --- | --- | --- | --- | --- | --- | --- | --- | --- | --- | --- | --- | --- | --- | --- | --- | --- | --- | --- | --- | --- | --- | --- | --- | --- | --- | --- | --- | --- | --- | --- | --- | --- | --- | --- | --- | --- | --- | --- | --- | --- | --- | --- | --- | --- | --- | --- | --- | --- | --- | --- | --- | --- | --- | --- | --- | --- | --- | --- | --- | --- | --- | --- | --- | --- | --- | --- | --- | --- | --- | --- | --- | --- | --- | --- | --- | --- | --- | --- | --- | --- | --- | --- | --- | --- | --- | --- | --- | --- | --- |

a The variants together explain 0.2% of the variation in Melanoma Skin Cancer (R2 = 0.002; F (TOTAL) = 68.319)

b Increase in odds of Melanoma Skin Cancer in per effect allele

c Effect Allele Frequency

d Minor Allele Frequency

| Characteristics of the single nucleotide polymorphisms (SNP) used as instrumental variables for Seborrhoeic Keratosisa   | SNP | Effect Allele | Other Allele | Effect (BETA)b | EAFc | MAFd | Standard Error | P-Value | | --- | --- | --- | --- | --- | --- | --- | --- | | rs2735940 | G | A | 0.239 | 0.5298 | 0.4702 | 0.0297 | 9.19E-16 | | rs3769567 | C | A | 0.1527 | 0.5026 | 0.4974 | 0.0296 | 2.44E-07 | | rs9844192 | T | C | -0.1514 | 0.5675 | 0.4325 | 0.03 | 4.40E-07 |   a The variants together explain 0.9% of the variation in Seborrhoeic Keratosis (R2 = 0.009; F (TOTAL) = 629.736)  b Increase in odds of Seborrhoeic Keratosis in per effect allele  c Effect Allele Frequency  d Minor Allele Frequency   | Characteristics of the single nucleotide polymorphisms (SNP) used as instrumental variables for Sicca Syndromea   | SNP | Effect Allele | Other Allele | Effect (BETA)b | EAFc | MAFd | Standard Error | P-Value | | --- | --- | --- | --- | --- | --- | --- | --- | | rs2853986 | C | T | 0.7754 | 0.09265 | 0.09265 | 0.0742 | 1.43E-25 | | rs35407265 | G | A | -0.3687 | 0.1232 | 0.1232 | 0.0613 | 1.79E-09 | | rs3778754 | G | C | 0.2834 | 0.4296 | 0.4296 | 0.0407 | 3.16E-12 | | rs496315 | C | T | 0.2254 | 0.4992 | 0.4992 | 0.0408 | 3.21E-08 | | rs9265957 | T | C | 0.6963 | 0.09369 | 0.09369 | 0.073 | 1.37E-21 | | | --- | --- | --- | --- | --- | --- | --- | --- | --- | --- | --- | --- | --- | --- | --- | --- | --- | --- | --- | --- | --- | --- | --- | --- | --- | --- | --- | --- | --- | --- | --- | --- | --- | --- | --- | --- | --- | --- | --- | --- | --- | --- | --- | --- | --- | --- | --- | --- | --- | |
| --- | --- | --- | --- | --- | --- | --- | --- | --- | --- | --- | --- | --- | --- | --- | --- | --- | --- | --- | --- | --- | --- | --- | --- | --- | --- | --- | --- | --- | --- | --- | --- | --- | --- | --- | --- | --- | --- | --- | --- | --- | --- | --- | --- | --- | --- | --- | --- | --- | --- | --- | --- | --- | --- | --- | --- | --- | --- | --- | --- | --- | --- | --- | --- | --- | --- | --- | --- | --- | --- | --- | --- | --- | --- | --- | --- | --- | --- | --- | --- | --- | --- |

a The variants together explain 1.8% of the variation in Sicca Syndrome (R2 = 0.018; F (TOTAL) = 771.944)

b Increase in odds of Sicca Syndrome in per effect allele

c Effect Allele Frequency

d Minor Allele Frequency

| Characteristics of the single nucleotide polymorphisms (SNP) used as instrumental variables for Telomere Lengtha   | SNP | Effect Allele | Other Allele | Effect (BETA)b | EAFc | MAFd | Standard Error | P-Value | | --- | --- | --- | --- | --- | --- | --- | --- | | rs1003322 | A | C | 0.0141734 | 0.213742 | 0.213742 | 0.00247546 | 1.00E-08 | | rs10112752 | A | G | -0.0287522 | 0.430369 | 0.430369 | 0.00202518 | 9.50E-46 | | rs1023767 | A | G | -0.0183732 | 0.237595 | 0.237595 | 0.00234772 | 5.00E-15 | | rs10768683 | G | C | 0.0469922 | 0.841033 | 0.158967 | 0.00277015 | 1.50E-64 | | rs10773176 | G | A | -0.0172009 | 0.741214 | 0.258786 | 0.00228534 | 5.20E-14 | | rs10774624 | A | G | 0.0149944 | 0.53276 | 0.46724 | 0.00205494 | 2.90E-13 | | rs10805346 | C | T | 0.0117072 | 0.439339 | 0.439339 | 0.00202147 | 7.00E-09 | | rs10840270 | G | C | 0.014383 | 0.655684 | 0.344316 | 0.00212494 | 1.30E-11 | | rs10845387 | A | G | -0.0141214 | 0.352666 | 0.352666 | 0.00209396 | 1.50E-11 | | rs10905255 | T | G | -0.0182493 | 0.57919 | 0.42081 | 0.00203099 | 2.60E-19 | | rs11085072 | T | C | -0.0131806 | 0.236909 | 0.236909 | 0.00236713 | 2.60E-08 | | rs11117354 | C | T | 0.0232506 | 0.696513 | 0.303487 | 0.00219601 | 3.40E-26 | | rs111527438 | C | T | 0.0125 | 0.351251 | 0.351251 | 0.00211016 | 3.10E-09 | | rs111950327 | C | G | 0.0238271 | 0.063628 | 0.063628 | 0.00409406 | 5.90E-09 | | rs11212631 | C | T | -0.0193458 | 0.199229 | 0.199229 | 0.00256554 | 4.70E-14 | | rs112394943 | C | T | -0.0198961 | 0.162741 | 0.162741 | 0.00281641 | 1.60E-12 | | rs113525195 | A | C | -0.0124075 | 0.290254 | 0.290254 | 0.00224132 | 3.10E-08 | | rs11557154 | T | C | -0.0343719 | 0.13003 | 0.13003 | 0.00298538 | 1.10E-30 | | rs11579626 | C | A | 0.0265113 | 0.084882 | 0.084882 | 0.00357752 | 1.30E-13 | | rs11584821 | T | C | -0.0306517 | 0.176208 | 0.176208 | 0.00263623 | 3.00E-31 | | rs116863223 | A | G | -0.0817874 | 0.011763 | 0.011763 | 0.00937157 | 2.60E-18 | | rs11699829 | A | G | 0.0641957 | 0.034146 | 0.034146 | 0.00602028 | 1.50E-26 | | rs117034449 | A | G | 0.0374377 | 0.023304 | 0.023304 | 0.00667898 | 2.10E-08 | | rs117407747 | T | C | 0.0450533 | 0.027571 | 0.027571 | 0.00611706 | 1.80E-13 | | rs117512405 | A | G | -0.0790134 | 0.017043 | 0.017043 | 0.00824611 | 9.50E-22 | | rs117630647 | A | G | 0.059565 | 0.021346 | 0.021346 | 0.00720413 | 1.40E-16 | | rs11769630 | A | T | -0.0256807 | 0.072227 | 0.072227 | 0.00389475 | 4.30E-11 | | rs11991877 | A | T | -0.030138 | 0.889309 | 0.110691 | 0.00318686 | 3.20E-21 | | rs12369950 | C | T | -0.0178308 | 0.140675 | 0.140675 | 0.00290205 | 8.00E-10 | | rs12412214 | A | G | -0.0245174 | 0.279765 | 0.279765 | 0.00222685 | 3.40E-28 | | rs12451892 | C | T | -0.0116145 | 0.380511 | 0.380511 | 0.00207578 | 2.20E-08 | | rs1291143 | C | A | 0.0493145 | 0.849026 | 0.150974 | 0.0027991 | 1.80E-69 | | rs12925933 | C | A | -0.0146622 | 0.66221 | 0.33779 | 0.00213796 | 7.00E-12 | | rs12932179 | G | A | -0.0136257 | 0.561399 | 0.438601 | 0.0020276 | 1.80E-11 | | rs13062095 | C | T | 0.0138552 | 0.327843 | 0.327843 | 0.00214113 | 9.70E-11 | | rs13230646 | C | T | -0.0173277 | 0.248945 | 0.248945 | 0.00232377 | 8.90E-14 | | rs1332941 | G | A | 0.0256552 | 0.820466 | 0.179534 | 0.00273159 | 5.90E-21 | | rs137901416 | A | G | 0.04572 | 0.100311 | 0.100311 | 0.00332355 | 4.70E-43 | | rs139669835 | T | C | -0.0612563 | 0.009365 | 0.009365 | 0.0105346 | 6.10E-09 | | rs139795227 | C | A | 0.0599379 | 0.014021 | 0.014021 | 0.00873247 | 6.70E-12 | | rs142426306 | T | C | -0.0504903 | 0.039544 | 0.039544 | 0.00539933 | 8.70E-21 | | rs143190905 | T | G | -0.0723995 | 0.080404 | 0.080404 | 0.00369421 | 1.60E-85 | | rs144204502 | T | C | -0.100574 | 0.012562 | 0.012562 | 0.00913369 | 3.40E-28 | | rs145114957 | G | C | 0.0272605 | 0.042648 | 0.042648 | 0.00498872 | 4.60E-08 | | rs150150565 | T | C | 0.063762 | 0.021455 | 0.021455 | 0.00739877 | 6.80E-18 | | rs1611236 | A | G | -0.0160135 | 0.32687 | 0.32687 | 0.00213359 | 6.10E-14 | | rs16978028 | T | A | -0.029945 | 0.143727 | 0.143727 | 0.00285068 | 8.20E-26 | | rs17445108 | A | G | -0.0168922 | 0.12695 | 0.12695 | 0.00300983 | 2.00E-08 | | rs17677991 | G | C | 0.0222664 | 0.342123 | 0.342123 | 0.00210806 | 4.40E-26 | | rs17803849 | T | C | 0.0273203 | 0.405161 | 0.405161 | 0.00203482 | 4.20E-41 | | rs182059586 | C | T | -0.0571159 | 0.02511 | 0.02511 | 0.00680853 | 4.90E-17 | | rs185174247 | A | G | 0.0372806 | 0.05609 | 0.05609 | 0.00435145 | 1.10E-17 | | rs188918174 | T | C | 0.0403062 | 0.036106 | 0.036106 | 0.00543604 | 1.20E-13 | | rs1907702 | A | G | 0.0150247 | 0.766771 | 0.233229 | 0.00242651 | 5.90E-10 | | rs1957937 | T | A | 0.0209365 | 0.16018 | 0.16018 | 0.00273361 | 1.90E-14 | | rs1985369 | G | A | -0.0311893 | 0.868178 | 0.131822 | 0.00300952 | 3.60E-25 | | rs2056726 | A | G | -0.0228078 | 0.214376 | 0.214376 | 0.00243638 | 7.90E-21 | | rs2230590 | C | T | -0.0158022 | 0.510897 | 0.489103 | 0.00200806 | 3.60E-15 | | rs2276182 | G | C | 0.0233529 | 0.403227 | 0.403227 | 0.00204247 | 2.80E-30 | | rs2282764 | G | A | -0.0224234 | 0.142384 | 0.142384 | 0.00289392 | 9.30E-15 | | rs2293579 | A | G | -0.012915 | 0.386274 | 0.386274 | 0.00205481 | 3.30E-10 | | rs2306646 | C | G | -0.0209417 | 0.559475 | 0.440525 | 0.00201898 | 3.30E-25 | | rs2538745 | C | T | -0.012942 | 0.602841 | 0.397159 | 0.002056 | 3.10E-10 | | rs2555104 | C | A | -0.0139717 | 0.434255 | 0.434255 | 0.00203498 | 6.60E-12 | | rs2763979 | T | C | -0.0277713 | 0.359721 | 0.359721 | 0.00208092 | 1.30E-40 | | rs28363070 | A | G | 0.0755557 | 0.013389 | 0.013389 | 0.00959987 | 3.50E-15 | | rs28502153 | A | C | -0.0215916 | 0.377958 | 0.377958 | 0.00206208 | 1.20E-25 | | rs28577594 | C | G | 0.0187657 | 0.709829 | 0.290171 | 0.00224024 | 5.40E-17 | | rs2967355 | C | A | -0.0461595 | 0.774276 | 0.225724 | 0.00238972 | 4.00E-83 | | rs2977608 | C | A | 0.0129483 | 0.743949 | 0.256051 | 0.00233716 | 3.00E-08 | | rs3093888 | A | G | -0.028973 | 0.05131 | 0.05131 | 0.00452459 | 1.50E-10 | | rs35446936 | A | G | -0.0940025 | 0.243674 | 0.243674 | 0.00232918 | 1.00E-200 | | rs35640778 | A | G | -0.209011 | 0.020757 | 0.020757 | 0.00702087 | 9.59E-195 | | rs3767952 | A | G | 0.0134472 | 0.226709 | 0.226709 | 0.00238826 | 1.80E-08 | | rs3785074 | G | A | 0.023863 | 0.289672 | 0.289672 | 0.00220455 | 2.60E-27 | | rs3891167 | G | A | -0.0425685 | 0.253435 | 0.253435 | 0.00239551 | 1.20E-70 | | rs41269079 | A | T | 0.0153617 | 0.188991 | 0.188991 | 0.0025499 | 1.70E-09 | | rs41304832 | A | G | 0.0611702 | 0.012378 | 0.012378 | 0.0093095 | 5.00E-11 | | rs429358 | C | T | 0.0173498 | 0.153969 | 0.153969 | 0.00277091 | 3.80E-10 | | rs4498805 | T | G | 0.0150601 | 0.546632 | 0.453368 | 0.00200376 | 5.70E-14 | | rs4530278 | T | G | 0.0138793 | 0.59815 | 0.40185 | 0.0020567 | 1.50E-11 | | rs45604339 | T | C | -0.020433 | 0.34242 | 0.34242 | 0.00211433 | 4.30E-22 | | rs4616688 | T | G | -0.0173476 | 0.525394 | 0.474606 | 0.00200198 | 4.50E-18 | | rs4695407 | G | A | 0.0141511 | 0.507843 | 0.492157 | 0.00199925 | 1.50E-12 | | rs4724 | A | G | -0.0547446 | 0.116598 | 0.116598 | 0.00312441 | 9.80E-69 | | rs4731541 | G | C | -0.0206119 | 0.624901 | 0.375099 | 0.00205962 | 1.40E-23 | | rs4743037 | T | C | 0.0147971 | 0.230874 | 0.230874 | 0.00238094 | 5.10E-10 | | rs55747751 | A | G | -0.0211612 | 0.077375 | 0.077375 | 0.00375164 | 1.70E-08 | | rs56061761 | A | G | -0.0203556 | 0.332642 | 0.332642 | 0.0022296 | 6.90E-20 | | rs56178008 | A | T | 0.0143739 | 0.437497 | 0.437497 | 0.00201464 | 9.70E-13 | | rs56799554 | G | A | -0.0259793 | 0.170183 | 0.170183 | 0.00267858 | 3.00E-22 | | rs5742915 | C | T | 0.0193377 | 0.445829 | 0.445829 | 0.00202886 | 1.60E-21 | | rs59409453 | G | A | 0.0202133 | 0.730602 | 0.269398 | 0.00230175 | 1.60E-18 | | rs6007020 | C | T | 0.0144904 | 0.367823 | 0.367823 | 0.00209637 | 4.80E-12 | | rs6054257 | A | G | -0.0141684 | 0.793522 | 0.206478 | 0.00247729 | 1.10E-08 | | rs611646 | A | T | -0.0368309 | 0.408685 | 0.408685 | 0.00203547 | 3.50E-73 | | rs61405042 | T | C | -0.0501874 | 0.029288 | 0.029288 | 0.00602955 | 8.50E-17 | | rs61748181 | T | C | -0.059181 | 0.028928 | 0.028928 | 0.00595394 | 2.80E-23 | | rs6536702 | A | G | 0.0534148 | 0.774647 | 0.225353 | 0.00238875 | 9.40E-111 | | rs6584579 | G | A | 0.0114923 | 0.398876 | 0.398876 | 0.00204674 | 2.00E-08 | | rs6587577 | G | A | -0.0182148 | 0.826346 | 0.173654 | 0.0026359 | 4.80E-12 | | rs6590343 | G | A | 0.0121739 | 0.516385 | 0.483615 | 0.00201444 | 1.50E-09 | | rs6659669 | T | C | -0.0117091 | 0.605095 | 0.394905 | 0.00205167 | 1.10E-08 | | rs6669563 | A | G | 0.0182358 | 0.437768 | 0.437768 | 0.00202476 | 2.10E-19 | | rs66731853 | A | G | -0.0177791 | 0.317304 | 0.317304 | 0.00215421 | 1.50E-16 | | rs670180 | A | T | -0.0115801 | 0.569104 | 0.430896 | 0.00203062 | 1.20E-08 | | rs6751209 | C | T | -0.0140465 | 0.204231 | 0.204231 | 0.00248465 | 1.60E-08 | | rs6776756 | A | G | -0.0174439 | 0.597562 | 0.402438 | 0.00203747 | 1.10E-17 | | rs6790988 | G | A | 0.0145728 | 0.741902 | 0.258098 | 0.00228428 | 1.80E-10 | | rs6881568 | A | C | 0.0169256 | 0.36258 | 0.36258 | 0.00207735 | 3.70E-16 | | rs7099229 | A | G | -0.0153288 | 0.273301 | 0.273301 | 0.00224403 | 8.40E-12 | | rs7164950 | G | A | 0.0129362 | 0.405979 | 0.405979 | 0.00204001 | 2.30E-10 | | rs7209057 | A | G | 0.011819 | 0.561044 | 0.438956 | 0.00202865 | 5.70E-09 | | rs7221585 | T | C | 0.0143271 | 0.22401 | 0.22401 | 0.00247042 | 6.70E-09 | | rs73581419 | T | C | 0.0229838 | 0.106605 | 0.106605 | 0.00324156 | 1.30E-12 | | rs73730598 | A | G | 0.0273632 | 0.054793 | 0.054793 | 0.00439272 | 4.70E-10 | | rs75664430 | G | C | -0.0235179 | 0.248028 | 0.248028 | 0.0023186 | 3.60E-24 | | rs76065543 | T | C | 0.0342843 | 0.137527 | 0.137527 | 0.00290708 | 4.20E-32 | | rs76219171 | A | G | 0.0359839 | 0.058433 | 0.058433 | 0.00431741 | 7.80E-17 | | rs762679 | A | T | 0.0310104 | 0.856501 | 0.143499 | 0.00285024 | 1.40E-27 | | rs76666449 | C | T | 0.0295125 | 0.100625 | 0.100625 | 0.00333186 | 8.20E-19 | | rs7705526 | A | C | 0.0776022 | 0.326578 | 0.326578 | 0.00216124 | 1.00E-200 | | rs77231040 | C | G | 0.0989303 | 0.005742 | 0.005742 | 0.0134649 | 2.00E-13 | | rs7772289 | T | G | 0.017549 | 0.503081 | 0.496919 | 0.00200003 | 1.70E-18 | | rs77732866 | A | G | 0.0177942 | 0.137597 | 0.137597 | 0.00290595 | 9.20E-10 | | rs7790856 | T | C | -0.0437199 | 0.289139 | 0.289139 | 0.00220526 | 1.80E-87 | | rs78491606 | C | A | -0.0756311 | 0.018433 | 0.018433 | 0.00741168 | 1.90E-24 | | rs79977579 | A | C | 0.0281517 | 0.09555 | 0.09555 | 0.00343182 | 2.30E-16 | | rs80116508 | A | G | -0.0352672 | 0.062356 | 0.062356 | 0.00415151 | 2.00E-17 | | rs80324517 | A | G | 0.0396515 | 0.048259 | 0.048259 | 0.00466286 | 1.80E-17 | | rs8102497 | A | G | -0.0149654 | 0.431828 | 0.431828 | 0.0020233 | 1.40E-13 | | rs8105767 | G | A | 0.0328384 | 0.29467 | 0.29467 | 0.00220117 | 2.50E-50 | | rs869785 | C | T | -0.0147303 | 0.672471 | 0.327529 | 0.00212801 | 4.40E-12 | | rs871134 | T | C | -0.0182986 | 0.569032 | 0.430968 | 0.0020263 | 1.70E-19 | | rs932002 | T | C | -0.0402052 | 0.150843 | 0.150843 | 0.00279667 | 7.30E-47 | | rs9398196 | G | A | -0.0143586 | 0.52005 | 0.47995 | 0.00201175 | 9.50E-13 | | rs939916 | A | G | 0.0241795 | 0.669967 | 0.330033 | 0.00216724 | 6.60E-29 | | rs9419958 | C | T | -0.0810098 | 0.86139 | 0.13861 | 0.00293847 | 2.60E-167 | | rs9600019 | T | C | 0.0127134 | 0.335579 | 0.335579 | 0.00213096 | 2.40E-09 | | rs9878436 | T | C | -0.0143407 | 0.434393 | 0.434393 | 0.00201819 | 1.20E-12 | | rs9940099 | T | G | -0.033609 | 0.062718 | 0.062718 | 0.00411613 | 3.20E-16 | | rs9940099 | T | G | -0.033609 | 0.062718 | 0.062718 | 0.00411613 | 3.20E-16 | | rs9955360 | A | C | -0.0190311 | 0.869288 | 0.130712 | 0.00299791 | 2.20E-10 | |
| --- | --- | --- | --- | --- | --- | --- | --- | --- | --- | --- | --- | --- | --- | --- | --- | --- | --- | --- | --- | --- | --- | --- | --- | --- | --- | --- | --- | --- | --- | --- | --- | --- | --- | --- | --- | --- | --- | --- | --- | --- | --- | --- | --- | --- | --- | --- | --- | --- | --- | --- | --- | --- | --- | --- | --- | --- | --- | --- | --- | --- | --- | --- | --- | --- | --- | --- | --- | --- | --- | --- | --- | --- | --- | --- | --- | --- | --- | --- | --- | --- | --- | --- | --- | --- | --- | --- | --- | --- | --- | --- | --- | --- | --- | --- | --- | --- | --- | --- | --- | --- | --- | --- | --- | --- | --- | --- | --- | --- | --- | --- | --- | --- | --- | --- | --- | --- | --- | --- | --- | --- | --- | --- | --- | --- | --- | --- | --- | --- | --- | --- | --- | --- | --- | --- | --- | --- | --- | --- | --- | --- | --- | --- | --- | --- | --- | --- | --- | --- | --- | --- | --- | --- | --- | --- | --- | --- | --- | --- | --- | --- | --- | --- | --- | --- | --- | --- | --- | --- | --- | --- | --- | --- | --- | --- | --- | --- | --- | --- | --- | --- | --- | --- | --- | --- | --- | --- | --- | --- | --- | --- | --- | --- | --- | --- | --- | --- | --- | --- | --- | --- | --- | --- | --- | --- | --- | --- | --- | --- | --- | --- | --- | --- | --- | --- | --- | --- | --- | --- | --- | --- | --- | --- | --- | --- | --- | --- | --- | --- | --- | --- | --- | --- | --- | --- | --- | --- | --- | --- | --- | --- | --- | --- | --- | --- | --- | --- | --- | --- | --- | --- | --- | --- | --- | --- | --- | --- | --- | --- | --- | --- | --- | --- | --- | --- | --- | --- | --- | --- | --- | --- | --- | --- | --- | --- | --- | --- | --- | --- | --- | --- | --- | --- | --- | --- | --- | --- | --- | --- | --- | --- | --- | --- | --- | --- | --- | --- | --- | --- | --- | --- | --- | --- | --- | --- | --- | --- | --- | --- | --- | --- | --- | --- | --- | --- | --- | --- | --- | --- | --- | --- | --- | --- | --- | --- | --- | --- | --- | --- | --- | --- | --- | --- | --- | --- | --- | --- | --- | --- | --- | --- | --- | --- | --- | --- | --- | --- | --- | --- | --- | --- | --- | --- | --- | --- | --- | --- | --- | --- | --- | --- | --- | --- | --- | --- | --- | --- | --- | --- | --- | --- | --- | --- | --- | --- | --- | --- | --- | --- | --- | --- | --- | --- | --- | --- | --- | --- | --- | --- | --- | --- | --- | --- | --- | --- | --- | --- | --- | --- | --- | --- | --- | --- | --- | --- | --- | --- | --- | --- | --- | --- | --- | --- | --- | --- | --- | --- | --- | --- | --- | --- | --- | --- | --- | --- | --- | --- | --- | --- | --- | --- | --- | --- | --- | --- | --- | --- | --- | --- | --- | --- | --- | --- | --- | --- | --- | --- | --- | --- | --- | --- | --- | --- | --- | --- | --- | --- | --- | --- | --- | --- | --- | --- | --- | --- | --- | --- | --- | --- | --- | --- | --- | --- | --- | --- | --- | --- | --- | --- | --- | --- | --- | --- | --- | --- | --- | --- | --- | --- | --- | --- | --- | --- | --- | --- | --- | --- | --- | --- | --- | --- | --- | --- | --- | --- | --- | --- | --- | --- | --- | --- | --- | --- | --- | --- | --- | --- | --- | --- | --- | --- | --- | --- | --- | --- | --- | --- | --- | --- | --- | --- | --- | --- | --- | --- | --- | --- | --- | --- | --- | --- | --- | --- | --- | --- | --- | --- | --- | --- | --- | --- | --- | --- | --- | --- | --- | --- | --- | --- | --- | --- | --- | --- | --- | --- | --- | --- | --- | --- | --- | --- | --- | --- | --- | --- | --- | --- | --- | --- | --- | --- | --- | --- | --- | --- | --- | --- | --- | --- | --- | --- | --- | --- | --- | --- | --- | --- | --- | --- | --- | --- | --- | --- | --- | --- | --- | --- | --- | --- | --- | --- | --- | --- | --- | --- | --- | --- | --- | --- | --- | --- | --- | --- | --- | --- | --- | --- | --- | --- | --- | --- | --- | --- | --- | --- | --- | --- | --- | --- | --- | --- | --- | --- | --- | --- | --- | --- | --- | --- | --- | --- | --- | --- | --- | --- | --- | --- | --- | --- | --- | --- | --- | --- | --- | --- | --- | --- | --- | --- | --- | --- | --- | --- | --- | --- | --- | --- | --- | --- | --- | --- | --- | --- | --- | --- | --- | --- | --- | --- | --- | --- | --- | --- | --- | --- | --- | --- | --- | --- | --- | --- | --- | --- | --- | --- | --- | --- | --- | --- | --- | --- | --- | --- | --- | --- | --- | --- | --- | --- | --- | --- | --- | --- | --- | --- | --- | --- | --- | --- | --- | --- | --- | --- | --- | --- | --- | --- | --- | --- | --- | --- | --- | --- | --- | --- | --- | --- | --- | --- | --- | --- | --- | --- | --- | --- | --- | --- | --- | --- | --- | --- | --- | --- | --- | --- | --- | --- | --- | --- | --- | --- | --- | --- | --- | --- | --- | --- | --- | --- | --- | --- | --- | --- | --- | --- | --- | --- | --- | --- | --- | --- | --- | --- | --- | --- | --- | --- | --- | --- | --- | --- | --- | --- | --- | --- | --- | --- | --- | --- | --- | --- | --- | --- | --- | --- | --- | --- | --- | --- | --- | --- | --- | --- | --- | --- | --- | --- | --- | --- | --- | --- | --- | --- | --- | --- | --- | --- | --- | --- | --- | --- | --- | --- | --- | --- | --- | --- | --- | --- | --- | --- | --- | --- | --- | --- | --- | --- | --- | --- | --- | --- | --- | --- | --- | --- | --- | --- | --- | --- | --- | --- | --- | --- | --- | --- | --- | --- | --- | --- | --- | --- | --- | --- | --- | --- | --- | --- | --- | --- | --- | --- | --- | --- | --- | --- | --- | --- | --- | --- | --- | --- | --- | --- | --- | --- | --- | --- | --- | --- | --- | --- | --- | --- | --- | --- | --- | --- | --- | --- | --- | --- | --- | --- | --- | --- | --- | --- | --- | --- | --- | --- | --- | --- | --- | --- | --- | --- | --- | --- | --- | --- | --- | --- | --- | --- | --- | --- | --- | --- | --- | --- | --- | --- | --- | --- | --- | --- | --- | --- | --- | --- | --- | --- | --- | --- | --- | --- | --- | --- | --- | --- | --- | --- | --- | --- | --- | --- | --- | --- | --- | --- | --- | --- | --- | --- | --- | --- | --- | --- | --- | --- | --- | --- | --- | --- | --- | --- | --- | --- | --- | --- | --- | --- | --- | --- | --- | --- | --- | --- | --- | --- | --- | --- | --- | --- | --- | --- | --- | --- | --- | --- | --- | --- | --- | --- | --- | --- | --- | --- | --- | --- | --- | --- | --- | --- | --- | --- | --- | --- | --- | --- | --- | --- | --- | --- | --- | --- | --- | --- | --- | --- | --- | --- | --- | --- | --- | --- | --- | --- | --- | --- | --- | --- | --- | --- | --- | --- | --- | --- | --- | --- | --- | --- | --- | --- | --- | --- | --- | --- | --- | --- | --- | --- | --- | --- | --- | --- | --- | --- | --- | --- | --- | --- | --- | --- | --- | --- | --- | --- | --- | --- | --- | --- | --- | --- | --- | --- | --- | --- | --- | --- | --- | --- | --- | --- | --- | --- | --- | --- | --- | --- | --- | --- | --- | --- | --- | --- | --- | --- | --- | --- | --- | --- | --- | --- | --- | --- | --- | --- | --- | --- | --- | --- | --- | --- | --- | --- | --- | --- | --- | --- | --- | --- |

a The variants together explain 7.2% of the variation in Telomere Length (R2 = 0.072; F (TOTAL) = 256.145)

b Increase in Telomere Length in per effect allele

c Effect Allele Frequency

d Minor Allele Frequency

| Characteristics of the single nucleotide polymorphisms (SNP) used as instrumental variables for Intrinsic Epigenetic Age Accelerationa   | SNP | Effect Allele | Other Allele | Effect (BETA)b | EAFc | MAFd | Standard Error | P-Value | | --- | --- | --- | --- | --- | --- | --- | --- | | rs10447389 | A | G | -0.2764 | 0.2687 | 0.2687 | 0.034 | 4.42E-16 | | rs10732882 | G | T | 0.2405 | 0.5941 | 0.4059 | 0.0318 | 3.68E-14 | | rs10735418 | C | T | -0.1954 | 0.3722 | 0.3722 | 0.0321 | 1.14E-09 | | rs10949481 | T | A | -1.0823 | 0.0532 | 0.0532 | 0.0699 | 4.56E-54 | | rs12043492 | T | C | 0.2166 | 0.4212 | 0.4212 | 0.0313 | 4.35E-12 | | rs12666349 | C | T | -0.2548 | 0.1972 | 0.1972 | 0.0436 | 5.23E-09 | | rs12903325 | G | T | 0.2216 | 0.2404 | 0.2404 | 0.0357 | 5.48E-10 | | rs144317085 | T | A | -0.5136 | 0.0388 | 0.0388 | 0.0831 | 6.42E-10 | | rs1488106 | C | T | -0.1827 | 0.6279 | 0.3721 | 0.0311 | 4.25E-09 | | rs1511762 | C | T | -0.2642 | 0.7814 | 0.2186 | 0.0374 | 1.53E-12 | | rs1726672 | T | C | -0.2038 | 0.3036 | 0.3036 | 0.0329 | 6.05E-10 | | rs2275558 | A | G | -0.2335 | 0.2212 | 0.2212 | 0.0402 | 6.44E-09 | | rs2492286 | T | G | 0.2808 | 0.1519 | 0.1519 | 0.0428 | 5.29E-11 | | rs2736099 | G | A | -0.2326 | 0.6462 | 0.3538 | 0.0334 | 3.47E-12 | | rs34003787 | T | C | 0.3239 | 0.0862 | 0.0862 | 0.0581 | 2.54E-08 | | rs3917672 | G | A | 0.2622 | 0.5142 | 0.4858 | 0.0304 | 5.95E-18 | | rs4240228 | T | G | 0.2547 | 0.7168 | 0.2832 | 0.0334 | 2.47E-14 | | rs57941717 | T | G | 0.2908 | 0.2528 | 0.2528 | 0.0357 | 3.71E-16 | | rs6414374 | G | A | -0.3214 | 0.8375 | 0.1625 | 0.0418 | 1.42E-14 | | rs6577536 | G | A | -0.1968 | 0.5157 | 0.4843 | 0.0302 | 6.73E-11 | | rs75243280 | C | T | 0.2323 | 0.3314 | 0.3314 | 0.0339 | 7.37E-12 | | rs7550821 | T | C | -0.2551 | 0.2441 | 0.2441 | 0.035 | 3.27E-13 | | rs7627756 | A | G | 0.2162 | 0.5615 | 0.4385 | 0.0301 | 6.27E-13 | | rs79111787 | C | T | 0.9076 | 0.0322 | 0.0322 | 0.1412 | 1.28E-10 | |
| --- | --- | --- | --- | --- | --- | --- | --- | --- | --- | --- | --- | --- | --- | --- | --- | --- | --- | --- | --- | --- | --- | --- | --- | --- | --- | --- | --- | --- | --- | --- | --- | --- | --- | --- | --- | --- | --- | --- | --- | --- | --- | --- | --- | --- | --- | --- | --- | --- | --- | --- | --- | --- | --- | --- | --- | --- | --- | --- | --- | --- | --- | --- | --- | --- | --- | --- | --- | --- | --- | --- | --- | --- | --- | --- | --- | --- | --- | --- | --- | --- | --- | --- | --- | --- | --- | --- | --- | --- | --- | --- | --- | --- | --- | --- | --- | --- | --- | --- | --- | --- | --- | --- | --- | --- | --- | --- | --- | --- | --- | --- | --- | --- | --- | --- | --- | --- | --- | --- | --- | --- | --- | --- | --- | --- | --- | --- | --- | --- | --- | --- | --- | --- | --- | --- | --- | --- | --- | --- | --- | --- | --- | --- | --- | --- | --- | --- | --- | --- | --- | --- | --- | --- | --- | --- | --- | --- | --- | --- | --- | --- | --- | --- | --- | --- | --- | --- | --- | --- | --- | --- | --- | --- | --- | --- | --- | --- | --- | --- | --- | --- | --- | --- | --- | --- | --- | --- | --- | --- | --- | --- | --- | --- | --- | --- | --- | --- | --- | --- | --- | --- |

a The variants together explain 1.7% of the variation in Intrinsic Epigenetic Age Acceleration (R2 = 0.017; F (TOTAL) = 24.679)

b Increase in Intrinsic Epigenetic Age Acceleration in per effect allele

c Effect Allele Frequency

d Minor Allele Frequency

**(3) Supplementary Table 3** Results from IVW, Weighted Median, MR-Egger Regression, and Outlier-Corrected MR-PRESSO Mendelian Randomization (Univariate)

| Exposure | Outcome | Methods | Effect (OR) | 95% CI | | SE | P-Value |
| --- | --- | --- | --- | --- | --- | --- | --- |
| BMI (Body Mass Index) | Facial Ageing | IVW-FE | 1.045 | 1.025 | 1.065 | 0.010 | 4.956E-06 |
| IVW-MRE | 1.045 | 1.025 | 1.065 | 0.010 | 4.956E-06 |
| Weighted Median | 1.044 | 1.025 | 1.063 | 0.009 | 2.858E-06 |
| MR-Egger | 1.015 | 0.960 | 1.073 | 0.028 | 5.960E-01 |
| MR-PRESSO (outlier-corrected) | 1.056 | 1.043 | 1.069 | 0.0064 | 3.567E-12 |
| MR-PRESSO Outlier Test removes outlier bias driven by rs13107325, rs17024393, rs2207139 and rs3101336 | | | | | |
| IVW-FE | 1.054 | 1.040 | 1.069 | 0.007 | 2.515E-14 |
| IVW-MRE | 1.054 | 1.040 | 1.069 | 0.007 | 2.515E-14 |
| Weighted Median | 1.046 | 1.028 | 1.065 | 0.009 | 4.064E-07 |
| MR-Egger | 1.047 | 1.004 | 1.091 | 0.021 | 3.419E-02 |
| MR-PRESSO (outlier-corrected) | NA | NA | NA | NA | NA |
| BMI (Male) | Facial Ageing (Male) | IVW-FE | 1.058 | 1.017 | 1.101 | 0.020 | 0.006 |
| IVW-MRE | 1.058 | 1.017 | 1.101 | 0.020 | 0.006 |
| Weighted Median | 1.084 | 1.049 | 1.120 | 0.017 | 1.488E-06 |
| MR-Egger | 1.100 | 0.988 | 1.225 | 0.055 | 0.093 |
| MR-PRESSO (outlier-corrected) | 1.062 | 1.032 | 1.093 | 0.015 | 3.513E-04 |
| MR-PRESSO Outlier Test removes outlier bias driven by rs13107325 and rs2206277 | | | | | |
| IVW-FE | 1.063 | 1.032 | 1.096 | 0.015 | 6.489E-05 |
| IVW-MRE | 1.063 | 1.032 | 1.096 | 0.015 | 6.489E-05 |
| Weighted Median | 1.083 | 1.046 | 1.121 | 0.018 | 5.439E-06 |
| MR-Egger | 1.121 | 1.037 | 1.211 | 0.040 | 0.008 |
| MR-PRESSO (outlier-corrected) | NA | NA | NA | NA | NA |
| BMI (Female) | Facial Ageing (Female) | IVW-FE | 1.030 | 1.004 | 1.057 | 0.013 | 0.024 |
| IVW-MRE | 1.030 | 1.004 | 1.057 | 0.013 | 0.024 |
| Weighted Median | 1.027 | 1.001 | 1.054 | 0.013 | 0.044 |
| MR-Egger | 1.029 | 0.959 | 1.104 | 0.036 | 0.430 |
| MR-PRESSO (outlier-corrected) | 1.041 | 1.019 | 1.064 | 0.011 | 8.168E-04 |
| MR-PRESSO Outlier Test removes outlier bias driven by rs16851483 and rs7531118 | | | | | |
| IVW-FE | 1.040 | 1.017 | 1.064 | 0.012 | 6.975E-04 |
| IVW-MRE | 1.040 | 1.017 | 1.064 | 0.012 | 6.975E-04 |
| Weighted Median | 1.030 | 1.002 | 1.060 | 0.014 | 0.037 |
| MR-Egger | 1.039 | 0.978 | 1.104 | 0.031 | 0.227 |
| MR-PRESSO (outlier-corrected) | NA | NA | NA | NA | NA |
| BMI (Male, ＞50 years) | Facial Ageing (Male) | IVW-FE | 1.028 | 0.961 | 1.100 | 0.034 | 0.422 |
| IVW-MRE | 1.028 | 0.961 | 1.100 | 0.034 | 0.422 |
| Weighted Median | 1.057 | 1.009 | 1.108 | 0.024 | 0.020 |
| MR-Egger | 1.022 | 0.757 | 1.378 | 0.153 | 0.891 |
| MR-PRESSO (outlier-corrected) | 1.062 | 1.022 | 1.104 | 0.007 | 0.008 |
| MR-PRESSO Outlier Test removes outlier bias driven by rs1222069 and rs13107325 | | | | | |
| IVW-FE | 1.042 | 0.992 | 1.094 | 0.025 | 0.103 |
| IVW-MRE | 1.042 | 0.992 | 1.094 | 0.025 | 0.103 |
| Weighted Median | 1.058 | 1.011 | 1.108 | 0.023 | 0.015 |
| MR-Egger | 1.416 | 1.204 | 1.665 | 0.083 | 0.001 |
| MR-PRESSO (outlier-corrected) | NA | NA | NA | NA | NA |
| BMI (Female, ＞50 years) | Facial Ageing (Female) | IVW-FE | 1.018 | 0.988 | 1.049 | 0.015 | 0.234 |
| IVW-MRE | 1.018 | 0.988 | 1.049 | 0.015 | 0.234 |
| Weighted Median | 1.029 | 1.001 | 1.059 | 0.014 | 0.042 |
| MR-Egger | 1.118 | 1.029 | 1.215 | 0.042 | 0.018 |
| MR-PRESSO (outlier-corrected) | 1.021 | 0.996 | 1.045 | 0.0123 | 0.113 |
| Leave-one-out Analysis removes null estimates driven by rs990871 | | | | | |
| IVW-FE | 1.027 | 1.003 | 1.051 | 0.033 | 0.028 |
| IVW-MRE | 1.027 | 1.003 | 1.051 | 0.0120 | 0.028 |
| Weighted Median | 1.031 | 1.002 | 1.061 | 0.0146 | 0.034 |
| MR-Egger | 1.096 | 1.025 | 1.172 | 0.0341 | 0.018 |
| MR-PRESSO (outlier-corrected) | NA | NA | NA | NA | NA |
| BMI (Male, ＜50 years) | Facial Ageing (Male) | IVW-FE | 1.059 | 1.028 | 1.090 | 0.0149 | 1.364E-04 |
| IVW-MRE | 1.059 | 1.028 | 1.090 | 0.0149 | 1.364E-04 |
| Weighted Median | 1.074 | 1.039 | 1.111 | 0.0171 | 3.001E-05 |
| MR-Egger | 1.155 | 1.056 | 1.262 | 0.0455 | 3.414E-02 |
| MR-PRESSO (outlier-corrected) | NA | NA | NA | NA | NA |
| BMI (Female, ＜50 years) | Facial Ageing (Female) | IVW-FE | 1.013 | 0.983 | 1.043 | 0.015 | 0.400 |
| IVW-MRE | 1.013 | 0.983 | 1.043 | 0.015 | 0.400 |
| Weighted Median | 0.995 | 0.969 | 1.021 | 0.013 | 0.692 |
| MR-Egger | 1.036 | 0.941 | 1.141 | 0.049 | 0.478 |
| MR-PRESSO (outlier-corrected) | 1.021 | 1.001 | 1.042 | 0.010 | 0.055 |
| Waist-to-Hip Ratio (WHR) adjusted for Body Mass Index (BMI) | Facial Ageing | IVW-FE | 1.020 | 0.992 | 1.049 | 0.014 | 0.153 |
| IVW-MRE | 1.020 | 0.992 | 1.049 | 0.014 | 0.153 |
| Weighted Median | 1.022 | 0.999 | 1.046 | 0.012 | 0.062 |
| MR-Egger | 1.048 | 0.916 | 1.199 | 0.069 | 0.500 |
| MR-PRESSO (outlier-corrected) | 1.009 | 0.986 | 1.032 | 0.012 | 0.451 |
| WHR adjusted for BMI (Male) | Facial Ageing (Male) | IVW-FE | 1.028 | 0.910 | 1.161 | 0.062 | 0.662 |
| IVW-MRE | 1.028 | 0.910 | 1.161 | 0.062 | 0.662 |
| Weighted Median | 1.058 | 0.977 | 1.146 | 0.041 | 0.164 |
| MR-Egger | 1.098 | 0.989 | 1.219 | 0.053 | 0.844 |
| MR-PRESSO (outlier-corrected) | 1.083 | 1.040 | 1.128 | 0.0207 | 0.018 |
| MR-PRESSO Outlier Test removes outlier bias driven by rs1106529 | | | | | |
| IVW-FE | 1.087 | 1.022 | 1.155 | 0.031 | 0.008 |
| IVW-MRE | 1.087 | 1.031 | 1.145 | 0.027 | 0.002 |
| Weighted Median | 1.078 | 1.000 | 1.163 | 0.038 | 0.049 |
| MR-Egger | 1.113 | 0.973 | 1.273 | 0.069 | 0.336 |
| MR-PRESSO (outlier-corrected) | NA | NA | NA | NA | NA |
| WHR adjusted for BMI (Female) | Facial Ageing (Female) | IVW-FE | 0.996 | 0.981 | 1.011 | 0.008 | 0.598 |
| IVW-MRE | 0.996 | 0.981 | 1.011 | 0.008 | 0.598 |
| Weighted Median | 0.997 | 0.973 | 1.021 | 0.012 | 0.802 |
| MR-Egger | 0.974 | 0.916 | 1.035 | 0.031 | 0.400 |
| MR-PRESSO (outlier-corrected) | NA | NA | NA | NA | NA |
| WHR adjusted for BMI (Male, ＞50 years) | Facial Ageing (Male) | IVW-FE | 1.011 | 0.962 | 1.063 | 0.026 | 0.659 |
| IVW-MRE | 1.011 | 0.962 | 1.063 | 0.026 | 0.659 |
| Weighted Median | 1.029 | 0.978 | 1.082 | 0.026 | 0.267 |
| MR-Egger | 0.957 | 0.735 | 1.247 | 0.135 | 0.754 |
| MR-PRESSO (outlier-corrected) | 1.005 | 0.965 | 1.047 | 0.021 | 0.806 |
| Leave-one-out Analysis removes null estimates driven by rs8043049 | | | | | |
| IVW-FE | 1.038 | 1.000 | 1.078 | 0.019 | 0.049 |
| IVW-MRE | 1.038 | 1.003 | 1.075 | 0.018 | 0.033 |
| Weighted Median | 1.031 | 0.981 | 1.083 | 0.025 | 0.231 |
| MR-Egger | 1.087 | 0.901 | 1.311 | 0.096 | 0.409 |
| MR-PRESSO (outlier-corrected) | NA | NA | NA | NA | NA |
| WHR adjusted for BMI (Female, ＞50 years) | Facial Ageing (Female) | IVW-FE | 1.012 | 0.983 | 1.042 | 0.0150 | 0.411 |
| IVW-MRE | 1.012 | 0.983 | 1.042 | 0.0150 | 0.411 |
| Weighted Median | 1.019 | 0.989 | 1.049 | 0.0152 | 0.225 |
| MR-Egger | 0.988 | 0.844 | 1.157 | 0.0805 | 0.886 |
| MR-PRESSO (outlier-corrected) | 1.014 | 0.993 | 1.035 | 0.0107 | 0.228 |
| WHR adjusted for BMI (Male, ＜50 years) | Facial Ageing (Male) | IVW-FE | 1.040 | 1.000 | 1.082 | 0.020 | 0.051 |
| IVW-MRE | 1.040 | 1.000 | 1.082 | 0.020 | 0.051 |
| Weighted Median | 1.023 | 0.980 | 1.068 | 0.022 | 0.296 |
| MR-Egger | 0.936 | 0.760 | 1.153 | 0.106 | 0.553 |
| MR-PRESSO (outlier-corrected) | NA | NA | NA | NA | NA |
| WHR adjusted for BMI (Female, ＜50 years) | Facial Ageing (Female) | IVW-FE | 0.998 | 0.971 | 1.026 | 0.014 | 0.892 |
| IVW-MRE | 0.998 | 0.971 | 1.026 | 0.014 | 0.892 |
| Weighted Median | 0.982 | 0.952 | 1.014 | 0.016 | 0.269 |
| MR-Egger | 0.934 | 0.783 | 1.113 | 0.089 | 0.465 |
| MR-PRESSO (outlier-corrected) | NA | NA | NA | NA | NA |
| Mediator | Outcome | Methods | Effect (OR) | 95% CI | | SE | P-Value |
| Coronary Artery Disease | Facial Ageing | IVW-FE | 1.000 | 0.993 | 1.007 | 0.004 | 0.979 |
| IVW-MRE | 1.000 | 0.993 | 1.007 | 0.004 | 0.979 |
| Weighted Median | 1.003 | 0.995 | 1.011 | 0.004 | 0.491 |
| MR-Egger | 1.013 | 0.999 | 1.027 | 0.007 | 0.064 |
| MR-PRESSO (outlier-corrected) | 0.998 | 0.993 | 1.004 | 0.0028 | 0.544 |
| Myocardial Infarction | Facial Ageing | IVW-FE | 1.005 | 0.999 | 1.012 | 0.0034 | 0.115 |
| IVW-MRE | 1.005 | 0.999 | 1.012 | 0.0034 | 0.115 |
| Weighted Median | 1.009 | 1.000 | 1.017 | 0.0042 | 0.041 |
| MR-Egger | 1.018 | 1.003 | 1.033 | 0.0077 | 0.030 |
| MR-PRESSO (outlier-corrected) | 1.002 | 0.995 | 1.008 | 0.0033 | 0.654 |
| Leave-one-out Analysis removes null estimates driven by rs72934535 | | | | | |
| IVW-FE | 1.007 | 1.000 | 1.013 | 0.0033 | 0.048 |
| IVW-MRE | 1.007 | 1.000 | 1.013 | 0.0033 | 0.048 |
| Weighted Median | 1.009 | 1.001 | 1.017 | 0.0041 | 0.029 |
| MR-Egger | 1.020 | 1.006 | 1.035 | 0.0073 | 0.011 |
| MR-PRESSO (outlier-corrected) | NA | NA | NA | NA | NA |
| Hypertension | Facial Ageing | IVW-FE | 1.003 | 0.996 | 1.011 | 0.0040 | 0.384 |
| IVW-MRE | 1.003 | 0.996 | 1.011 | 0.0040 | 0.384 |
| Weighted Median | 0.999 | 0.992 | 1.007 | 0.0038 | 0.861 |
| MR-Egger | 0.975 | 0.950 | 1.001 | 0.0134 | 0.066 |
| MR-PRESSO (outlier-corrected) | 1.000 | 0.994 | 1.006 | 0.0031 | 0.957 |
| Systolic Blood Pressure | Facial Ageing | IVW-FE | 1.000 | 0.999 | 1.001 | 3.407E-04 | 0.873 |
| IVW-MRE | 1.000 | 0.999 | 1.001 | 3.407E-04 | 0.873 |
| Weighted Median | 1.000 | 0.999 | 1.001 | 3.506E-04 | 0.719 |
| MR-Egger | 1.000 | 0.998 | 1.001 | 8.560E-04 | 0.738 |
| MR-PRESSO (outlier-corrected) | 1.000 | 0.999 | 1.001 | 2.684E-04 | 0.954 |
| Diastolic Blood Pressure | Facial Ageing | IVW-FE | 1.000 | 0.999 | 1.002 | 0.001 | 0.392 |
| IVW-MRE | 1.000 | 0.999 | 1.002 | 0.001 | 0.392 |
| Weighted Median | 1.000 | 0.999 | 1.001 | 0.001 | 0.505 |
| MR-Egger | 0.999 | 0.996 | 1.001 | 0.001 | 0.349 |
| MR-PRESSO (outlier-corrected) | 1.000 | 0.999 | 1.001 | 0.0004 | 0.527 |
| Ankylosing Spondylitis | Facial Ageing | IVW-FE | 1.000 | 0.999 | 1.001 | 0.000 | 0.419 |
| IVW-MRE | 1.000 | 0.999 | 1.001 | 0.000 | 0.419 |
| Weighted Median | 1.000 | 0.999 | 1.001 | 0.001 | 0.352 |
| MR-Egger | 0.999 | 0.998 | 1.001 | 0.001 | 0.531 |
| MR-PRESSO (outlier-corrected) | NA | NA | NA | NA | NA |
| Allergic Disease (Asthma, Hay Fever or Eczema) | Facial Ageing | IVW-FE | 1.000 | 0.992 | 1.008 | 0.0043 | 0.974 |
| IVW-MRE | 1.000 | 0.992 | 1.008 | 0.0043 | 0.974 |
| Weighted Median | 0.997 | 0.988 | 1.007 | 0.0048 | 0.550 |
| MR-Egger | 0.989 | 0.966 | 1.013 | 0.0120 | 0.376 |
| MR-PRESSO (outlier-corrected) | 0.995 | 0.987 | 1.002 | 0.0039 | 0.191 |
| Systemic Lupus Erythematosus | Facial Ageing | IVW-FE | 1.001 | 1.000 | 1.003 | 0.001 | 0.119 |
| IVW-MRE | 1.001 | 1.000 | 1.003 | 0.001 | 0.119 |
| Weighted Median | 1.001 | 0.999 | 1.003 | 0.001 | 0.435 |
| MR-Egger | 1.003 | 1.001 | 1.006 | 0.001 | 0.024 |
| MR-PRESSO (outlier-corrected) | 1.000 | 0.999 | 1.002 | 0.001 | 0.687 |
| MR-PRESSO Outlier Test removes outlier bias driven by rs389884 and rs13019891 | | | | | |
| IVW-FE | 1.001 | 0.999 | 1.002 | 0.001 | 0.267 |
| IVW-MRE | 1.001 | 0.999 | 1.002 | 0.001 | 0.267 |
| Weighted Median | 1.001 | 0.999 | 1.003 | 0.001 | 0.498 |
| MR-Egger | 1.003 | 0.999 | 1.006 | 0.002 | 0.114 |
| MR-PRESSO (outlier-corrected) | NA | NA | NA | NA | NA |
| Primary Sclerosing Cholangitis | Facial Ageing | IVW-FE | 1.002 | 1.000 | 1.004 | 0.001 | 0.023 |
| IVW-MRE | 1.002 | 1.000 | 1.004 | 0.001 | 0.023 |
| Weighted Median | 1.003 | 1.000 | 1.005 | 0.001 | 0.038 |
| MR-Egger | 1.002 | 0.999 | 1.005 | 0.002 | 0.275 |
| MR-PRESSO (outlier-corrected) | NA | NA | NA | NA | NA |
| Celiac Disease | Facial Ageing | IVW-FE | 1.002 | 1.001 | 1.004 | 0.001 | 0.009 |
| IVW-MRE | 1.002 | 1.001 | 1.004 | 0.001 | 0.009 |
| Weighted Median | 1.003 | 1.001 | 1.005 | 0.001 | 0.003 |
| MR-Egger | 1.003 | 1.001 | 1.006 | 0.001 | 0.021 |
| MR-PRESSO (outlier-corrected) | NA | NA | NA | NA | NA |
| Alzheimer's Disease | Facial Ageing | IVW-FE | 1.000 | 0.995 | 1.005 | 0.0025 | 0.897 |
| IVW-MRE | 1.000 | 0.995 | 1.005 | 0.0025 | 0.897 |
| Weighted Median | 0.999 | 0.995 | 1.003 | 0.0021 | 0.543 |
| MR-Egger | 1.003 | 0.996 | 1.010 | 0.0035 | 0.447 |
| MR-PRESSO (outlier-corrected) | 1.001 | 0.997 | 1.005 | 0.0021 | 0.569 |
| Schizophrenia | Facial Ageing | IVW-FE | 0.997 | 0.992 | 1.003 | 0.0028 | 0.339 |
| IVW-MRE | 0.997 | 0.992 | 1.003 | 0.0028 | 0.339 |
| Weighted Median | 0.996 | 0.991 | 1.001 | 0.0025 | 0.132 |
| MR-Egger | 0.994 | 0.974 | 1.015 | 0.0104 | 0.572 |
| MR-PRESSO (outlier-corrected) | 0.996 | 0.992 | 1.000 | 0.0021 | 0.086 |
| Ischemic Stroke | Facial Ageing | IVW-FE | 1.014 | 1.002 | 1.027 | 0.006 | 0.024 |
| IVW-MRE | 1.014 | 1.002 | 1.027 | 0.006 | 0.024 |
| Weighted Median | 1.009 | 0.995 | 1.023 | 0.007 | 0.222 |
| MR-Egger | 1.033 | 0.966 | 1.104 | 0.034 | 0.360 |
| MR-PRESSO (outlier-corrected) | NA | NA | NA | NA | NA |
| Multiple Sclerosis | Facial Ageing | IVW-FE | 1.004 | 1.001 | 1.007 | 0.002 | 0.021 |
| IVW-MRE | 1.004 | 1.001 | 1.007 | 0.002 | 0.021 |
| Weighted Median | 1.005 | 1.001 | 1.009 | 0.002 | 0.008 |
| MR-Egger | 1.005 | 0.999 | 1.011 | 0.003 | 0.126 |
| MR-PRESSO (outlier-corrected) | NA | NA | NA | NA | NA |
| Hypothyroidism | Facial Ageing | IVW-FE | 1.000 | 0.995 | 1.004 | 0.0023 | 0.960 |
| IVW-MRE | 1.000 | 0.995 | 1.004 | 0.0023 | 0.960 |
| Weighted Median | 1.004 | 0.998 | 1.009 | 0.0028 | 0.206 |
| MR-Egger | 1.001 | 0.990 | 1.013 | 0.0061 | 0.821 |
| MR-PRESSO (outlier-corrected) | NA | NA | NA | NA | NA |
| T2D (Type 2 Diabetes) | Facial Ageing | IVW-FE | 1.001 | 0.996 | 1.007 | 0.0027 | 0.592 |
| IVW-MRE | 1.001 | 0.996 | 1.007 | 0.0027 | 0.592 |
| Weighted Median | 1.003 | 0.997 | 1.009 | 0.0030 | 0.261 |
| MR-Egger | 0.992 | 0.980 | 1.004 | 0.0060 | 0.186 |
| MR-PRESSO (outlier-corrected) | 1.003 | 0.999 | 1.008 | 0.0022 | 0.110 |
| Homeostasis Model Assessment of Insulin Resistance (HOMA-IR) | Facial Ageing | IVW-FE | 0.964 | 0.916 | 1.016 | 0.027 | 0.173 |
| IVW-MRE | 0.964 | 0.916 | 1.016 | 0.027 | 0.173 |
| Weighted Median | 0.961 | 0.910 | 1.015 | 0.028 | 0.159 |
| MR-Egger | 0.930 | 0.779 | 1.110 | 0.090 | 0.451 |
| MR-PRESSO (outlier-corrected) | NA | NA | NA | NA | NA |
| Sex Hormone-Binding Globulin (SHBG) Levels | Facial Ageing | IVW-FE | 1.006 | 1.000 | 1.013 | 0.003 | 0.067 |
| IVW-MRE | 1.006 | 1.000 | 1.013 | 0.003 | 0.067 |
| Weighted Median | 0.993 | 0.985 | 1.002 | 0.004 | 0.122 |
| MR-Egger | 0.997 | 0.987 | 1.008 | 0.005 | 0.626 |
| MR-PRESSO (outlier-corrected) | 1.007 | 1.001 | 1.013 | 0.0030 | 0.028 |
| MR-PRESSO Outlier Test removes outlier bias driven by rs11010551, rs11600570, rs11600570, rs138840,  rrs1421085, rs1529868, rs17036326, rs2293579, rs4246215, rs543874, rs59774409, rs6479896, rs72787511, and rs72787511 | | | | | |
| IVW-FE | 1.007 | 1.001 | 1.013 | 0.003 | 0.017 |
| IVW-MRE | 1.007 | 1.001 | 1.013 | 0.003 | 0.017 |
| Weighted Median | 0.994 | 0.986 | 1.001 | 0.004 | 0.085 |
| MR-Egger | 1.004 | 0.995 | 1.013 | 0.005 | 0.416 |
| MR-PRESSO (outlier-corrected) | NA | NA | NA | NA | NA |
| Triglycerides Level | Facial Ageing | IVW-FE | 0.992 | 0.975 | 1.009 | 0.0086 | 0.357 |
| IVW-MRE | 0.992 | 0.975 | 1.009 | 0.0086 | 0.357 |
| Weighted Median | 0.998 | 0.987 | 1.010 | 0.0059 | 0.732 |
| MR-Egger | 0.990 | 0.959 | 1.023 | 0.0164 | 0.564 |
| MR-PRESSO (outlier-corrected) | 0.995 | 0.985 | 1.004 | 0.0049 | 0.288 |
| Total cholesterol Level | Facial Ageing | IVW-FE | 1.003 | 0.995 | 1.011 | 0.004 | 0.492 |
| IVW-MRE | 1.003 | 0.995 | 1.011 | 0.004 | 0.492 |
| Weighted Median | 1.001 | 0.992 | 1.010 | 0.005 | 0.886 |
| MR-Egger | 1.004 | 0.990 | 1.018 | 0.007 | 0.562 |
| MR-PRESSO (outlier-corrected) | 1.001 | 0.994 | 1.007 | 0.0034 | 0.834 |
| HDL cholesterol Level | Facial Ageing | IVW-FE | 1.004 | 0.993 | 1.015 | 0.0058 | 0.492 |
| IVW-MRE | 1.004 | 0.993 | 1.015 | 0.0058 | 0.492 |
| Weighted Median | 1.006 | 0.998 | 1.015 | 0.0044 | 0.148 |
| MR-Egger | 1.013 | 0.995 | 1.032 | 0.0093 | 0.159 |
| MR-PRESSO (outlier-corrected) | 1.002 | 0.994 | 1.009 | 0.0040 | 0.688 |
| LDL cholesterol Level | Facial Ageing | IVW-FE | 1.000 | 0.993 | 1.007 | 0.0037 | 0.983 |
| IVW-MRE | 1.000 | 0.993 | 1.007 | 0.0037 | 0.983 |
| Weighted Median | 1.000 | 0.994 | 1.007 | 0.0032 | 0.944 |
| MR-Egger | 1.002 | 0.992 | 1.011 | 0.0049 | 0.745 |
| MR-PRESSO (outlier-corrected) | 0.998 | 0.993 | 0.999 | 0.0030 | 0.585 |
| Fasting Glucose Level | Facial Ageing | IVW-FE | 0.978 | 0.938 | 1.019 | 0.0210 | 0.282 |
| IVW-MRE | 0.978 | 0.938 | 1.019 | 0.0210 | 0.282 |
| Weighted Median | 0.976 | 0.951 | 1.002 | 0.0134 | 0.070 |
| MR-Egger | 0.971 | 0.889 | 1.060 | 0.0450 | 0.512 |
| MR-PRESSO (outlier-corrected) | 0.991 | 0.969 | 1.013 | 0.0112 | 0.409 |
| Fasting Insulin Level | Facial Ageing | IVW-FE | 0.971 | 0.880 | 1.072 | 0.050 | 0.565 |
| IVW-MRE | 0.971 | 0.880 | 1.072 | 0.050 | 0.565 |
| Weighted Median | 1.011 | 0.941 | 1.085 | 0.036 | 0.772 |
| MR-Egger | 1.015 | 0.585 | 1.761 | 0.281 | 0.958 |
| MR-PRESSO (outlier-corrected) | 0.955 | 0.879 | 1.037 | 0.0422 | 0.305 |
| Proinsulin Level | Facial Ageing | IVW-FE | 1.013 | 0.992 | 1.034 | 0.0105 | 0.222 |
| IVW-MRE | 1.013 | 0.992 | 1.034 | 0.0105 | 0.222 |
| Weighted Median | 1.005 | 0.986 | 1.024 | 0.0096 | 0.585 |
| MR-Egger | 1.048 | 1.004 | 1.094 | 0.0219 | 0.076 |
| MR-PRESSO (outlier-corrected) | 1.003 | 0.984 | 1.023 | 0.0099 | 0.782 |
| Glycated Hemoglobin (HbA1c) Level | Facial Ageing | IVW-FE | 1.008 | 0.967 | 1.052 | 0.022 | 0.703 |
| IVW-MRE | 1.008 | 0.967 | 1.052 | 0.022 | 0.703 |
| Weighted Median | 0.993 | 0.957 | 1.030 | 0.019 | 0.699 |
| MR-Egger | 0.985 | 0.901 | 1.077 | 0.046 | 0.743 |
| MR-PRESSO (outlier-corrected) | 0.980 | 0.968 | 1.030 | 0.0160 | 0.915 |
| Urate Level | Facial Ageing | IVW-FE | 0.987 | 0.981 | 0.994 | 0.004 | 3.730E-04 |
| IVW-MRE | 0.987 | 0.981 | 0.994 | 0.004 | 3.730E-04 |
| Weighted Median | 0.984 | 0.975 | 0.992 | 0.005 | 2.516E-04 |
| MR-Egger | 0.981 | 0.969 | 0.994 | 0.006 | 0.007 |
| MR-PRESSO (outlier-corrected) | NA | NA | NA | NA | NA |
| C-Reactive Protein Level | Facial Ageing | IVW-FE | 1.000 | 0.990 | 1.009 | 0.0049 | 0.928 |
| IVW-MRE | 1.000 | 0.990 | 1.009 | 0.0049 | 0.928 |
| Weighted Median | 1.003 | 0.993 | 1.014 | 0.0054 | 0.565 |
| MR-Egger | 0.996 | 0.982 | 1.011 | 0.0073 | 0.614 |
| MR-PRESSO (outlier-corrected) | 1.000 | 0.992 | 1.008 | 0.0041 | 0.961 |
| Serum Albumin Level | Facial Ageing | IVW-FE | 0.992 | 0.977 | 1.007 | 0.008 | 0.272 |
| IVW-MRE | 0.992 | 0.977 | 1.007 | 0.008 | 0.272 |
| Weighted Median | 0.993 | 0.978 | 1.008 | 0.008 | 0.341 |
| MR-Egger | 1.005 | 0.978 | 1.033 | 0.014 | 0.711 |
| MR-PRESSO (outlier-corrected) | 0.989 | 0.978 | 0.999 | 0.0055 | 0.039 |
| MR-PRESSO Outlier Test removes outlier bias driven by rs10419198, rs1050976, rs11012732, rs11236524, rs12445401, rs13107325, rs1801282, rs2227827, rs28929474, rs2923096, rs4680338, rs7073746, rs72697295, rs74613454, rs76895963, rs9616371, and rs9972653 | | | | | |
| IVW-FE | 0.993 | 0.982 | 1.004 | 0.006 | 0.209 |
| IVW-MRE | 0.993 | 0.982 | 1.004 | 0.006 | 0.209 |
| Weighted Median | 0.992 | 0.978 | 1.005 | 0.007 | 0.207 |
| MR-Egger | 1.001 | 0.979 | 1.022 | 0.011 | 0.952 |
| MR-PRESSO (outlier-corrected) | NA | NA | NA | NA | NA |
| Receptor for advanced glycosylation end products Level | Facial Ageing | IVW-FE | 0.986 | 0.978 | 0.995 | 0.004 | 1.819E-03 |
| IVW-MRE | 0.986 | 0.981 | 0.992 | 0.003 | 7.344E-06 |
| Weighted Median | 0.982 | 0.971 | 0.994 | 0.006 | 2.433E-03 |
| MR-Egger | 0.977 | 0.952 | 1.002 | 0.013 | 1.241E-01 |
| MR-PRESSO (outlier-corrected) | NA | NA | NA | NA | NA |
| Breast cancer (Female) | Facial Ageing (Female) | IVW-FE | 0.999 | 0.993 | 1.006 | 0.0032 | 0.819 |
| IVW-MRE | 0.999 | 0.993 | 1.006 | 0.0032 | 0.819 |
| Weighted Median | 1.003 | 0.995 | 1.012 | 0.0041 | 0.408 |
| MR-Egger | 1.006 | 0.992 | 1.019 | 0.0069 | 0.431 |
| MR-PRESSO (outlier-corrected) | 1.001 | 0.996 | 1.007 | 0.0027 | 0.659 |
| Age at First Birth (Female) | Facial Ageing (Female) | IVW-FE | 1.007 | 0.997 | 1.018 | 0.0053 | 0.175 |
| IVW-MRE | 1.007 | 0.997 | 1.018 | 0.0053 | 0.175 |
| Weighted Median | 1.005 | 0.995 | 1.016 | 0.0055 | 0.340 |
| MR-Egger | 0.998 | 0.956 | 1.042 | 0.0217 | 0.932 |
| MR-PRESSO (outlier-corrected) | 1.009 | 0.998 | 1.080 | 0.0045 | 0.091 |
| Age At Menarche (Female) | Facial Ageing (Female) | IVW-FE | 0.990 | 0.982 | 0.998 | 0.004 | 0.020 |
| IVW-MRE | 0.990 | 0.982 | 0.998 | 0.004 | 0.020 |
| Weighted Median | 0.990 | 0.978 | 1.002 | 0.006 | 0.108 |
| MR-Egger | 1.005 | 0.981 | 1.029 | 0.012 | 0.695 |
| MR-PRESSO (outlier-corrected) | 0.990 | 0.983 | 0.998 | 0.004 | 9.527E-03 |
| MR-PRESSO Outlier Test removes outlier bias driven by rs10049090, rs13218577, rs1327938, rs1356379, rs4951261, rs72768041, rs732898 and rs9349203 | | | | | |
| IVW-FE | 0.988 | 0.980 | 0.997 | 0.004 | 0.005 |
| IVW-MRE | 0.988 | 0.980 | 0.997 | 0.004 | 0.005 |
| Weighted Median | 0.990 | 0.978 | 1.003 | 0.006 | 0.120 |
| MR-Egger | 1.003 | 0.980 | 1.026 | 0.012 | 0.807 |
| MR-PRESSO (outlier-corrected) | NA | NA | NA | NA | NA |
| Sleep Duration | Facial Ageing | IVW-FE | 0.989 | 0.901 | 1.087 | 0.048 | 0.826 |
| IVW-MRE | 0.989 | 0.901 | 1.087 | 0.048 | 0.826 |
| Weighted Median | 1.009 | 0.952 | 1.068 | 0.029 | 0.774 |
| MR-Egger | 0.735 | 0.524 | 1.031 | 0.173 | 0.325 |
| MR-PRESSO (outlier-corrected) | NA | NA | NA | NA | NA |
| Cigarettes Per Day | Facial Ageing | IVW-FE | 1.022 | 1.006 | 1.039 | 0.008 | 0.008 |
| IVW-MRE | 1.022 | 1.006 | 1.039 | 0.008 | 0.008 |
| Weighted Median | 1.035 | 1.022 | 1.047 | 0.006 | 8.589E-08 |
| MR-Egger | 1.035 | 1.006 | 1.064 | 0.014 | 0.028 |
| MR-PRESSO (outlier-corrected) | 1.021 | 1.006 | 1.037 | 0.0076 | 0.012 |
| MR-PRESSO Outlier Test removes outlier bias driven by rs4785587, rs7431710, and rs8034191 | | | | | |
| IVW-FE | 1.020 | 1.005 | 1.036 | 0.008 | 9.674E-03 |
| IVW-MRE | 1.020 | 1.005 | 1.036 | 0.008 | 9.674E-03 |
| Weighted Median | 1.009 | 0.992 | 1.025 | 0.008 | 0.308 |
| MR-Egger | 0.994 | 0.960 | 1.028 | 0.017 | 0.728 |
| MR-PRESSO (outlier-corrected) | NA | NA | NA | NA | NA |
| Age of smoking initiation | Facial Ageing | IVW-FE | 0.979 | 0.927 | 1.033 | 0.028 | 0.436 |
| IVW-MRE | 0.979 | 0.927 | 1.033 | 0.028 | 0.436 |
| Weighted Median | 0.967 | 0.913 | 1.025 | 0.030 | 0.264 |
| MR-Egger | 0.943 | 0.781 | 1.139 | 0.096 | 0.570 |
| MR-PRESSO (outlier-corrected) | NA | NA | NA | NA | NA |
| Alcohol Consumption | Facial Ageing | IVW-FE | 1.002 | 0.991 | 1.014 | 0.006 | 0.689 |
| IVW-MRE | 1.002 | 0.997 | 1.007 | 0.003 | 0.356 |
| Weighted Median | 1.002 | 0.989 | 1.015 | 0.007 | 0.762 |
| MR-Egger | 1.029 | 0.956 | 1.108 | 0.038 | 0.491 |
| MR-PRESSO (outlier-corrected) | NA | NA | NA | NA | NA |
| Coffee Intake | Facial Ageing | IVW-FE | 1.057 | 1.015 | 1.100 | 0.020 | 0.007 |
| IVW-MRE | 1.057 | 1.015 | 1.100 | 0.020 | 0.007 |
| Weighted Median | 1.047 | 1.007 | 1.088 | 0.020 | 0.020 |
| MR-Egger | 1.031 | 0.951 | 1.117 | 0.041 | 0.468 |
| MR-PRESSO (outlier-corrected) | 1.040 | 1.004 | 1.077 | 0.0178 | 0.035 |
| MR-PRESSO Outlier Test removes outlier bias driven by rs10119174, rs1421085, and rs516636 | | | | | |
| IVW-FE | 1.040 | 1.004 | 1.077 | 0.018 | 0.028 |
| IVW-MRE | 1.040 | 1.004 | 1.077 | 0.018 | 0.028 |
| Weighted Median | 1.037 | 0.998 | 1.077 | 0.020 | 0.066 |
| MR-Egger | 1.025 | 0.957 | 1.099 | 0.035 | 0.482 |
| MR-PRESSO (outlier-corrected) | NA | NA | NA | NA | NA |
| Basal Cell Carcinoma | Facial Ageing | IVW-FE | 1.013 | 1.002 | 1.024 | 0.005 | 0.016 |
| IVW-MRE | 1.013 | 1.002 | 1.024 | 0.005 | 0.016 |
| Weighted Median | 1.003 | 0.998 | 1.008 | 0.002 | 0.236 |
| MR-Egger | 1.012 | 0.989 | 1.037 | 0.012 | 0.313 |
| MR-PRESSO (outlier-corrected) | NA | NA | NA | NA | NA |
| Melanoma Skin Cancer | Facial Ageing | IVW-FE | 6.053 | 1.981 | 18.499 | 0.570 | 1.584E-03 |
| IVW-MRE | 6.053 | 1.981 | 18.499 | 0.570 | 1.584E-03 |
| Weighted Median | 11.057 | 5.854 | 20.883 | 0.324 | 1.293E-13 |
| MR-Egger | 7.880 | 3.224 | 19.261 | 0.456 | 1.131E-03 |
| MR-PRESSO (outlier-corrected) | 5.361 | 1.675 | 17.156 | 0.593 | 6.621E-02 |
| MR-PRESSO Outlier Test removes outlier bias driven by rs12278954, rs16891982, rs1805007, rs2488002, rs31490, rs6059655, and rs871024 | | | | | |
| IVW-FE | 5.361 | 1.675 | 17.156 | 0.593 | 4.661E-03 |
| IVW-MRE | 5.361 | 1.675 | 17.156 | 0.593 | 4.661E-03 |
| Weighted Median | 6.537 | 2.946 | 14.509 | 0.407 | 3.913E-06 |
| MR-Egger | 5.477 | 0.185 | 161.722 | 1.727 | 0.429 |
| MR-PRESSO (outlier-corrected) | NA | NA | NA | NA | NA |
| Seborrhoeic Keratosis | Facial Ageing | IVW-FE | 1.004 | 0.995 | 1.012 | 0.004 | 0.372 |
| IVW-MRE | 1.004 | 0.995 | 1.012 | 0.004 | 0.372 |
| Weighted Median | 1.006 | 0.998 | 1.014 | 0.004 | 0.141 |
| MR-Egger | 1.024 | 0.990 | 1.060 | 0.018 | 0.400 |
| Sicca Syndrome | Facial Ageing | IVW-FE | 1.008 | 1.005 | 1.011 | 0.002 | 2.659E-06 |
| IVW-MRE | 1.008 | 1.005 | 1.011 | 0.002 | 1.746E-07 |
| Weighted Median | 1.009 | 1.005 | 1.013 | 0.002 | 5.121E-06 |
| MR-Egger | 1.012 | 1.005 | 1.019 | 0.004 | 1.889E-01 |
| MR-PRESSO (outlier-corrected) | NA | NA | NA | NA | NA |
| Telomere Length | Facial Ageing | IVW-FE | 0.988 | 0.974 | 1.002 | 0.007 | 0.085 |
| IVW-MRE | 0.988 | 0.974 | 1.002 | 0.007 | 0.085 |
| Weighted Median | 0.984 | 0.970 | 0.997 | 0.007 | 0.020 |
| MR-Egger | 0.962 | 0.939 | 0.986 | 0.013 | 0.002 |
| MR-PRESSO (outlier-corrected) | 0.983 | 0.972 | 0.995 | 0.006 | 0.005 |
| MR-PRESSO Outlier Test removes outlier bias driven by rs10805346, rs11584821, rs11699829, rs13062095,  rs1907702, rs2293579, and rs4695407 | | | | | |
| IVW-FE | 0.985 | 0.974 | 0.996 | 0.006 | 0.008 |
| IVW-MRE | 0.985 | 0.974 | 0.996 | 0.006 | 0.008 |
| Weighted Median | 0.984 | 0.970 | 0.997 | 0.007 | 0.020 |
| MR-Egger | 0.977 | 0.957 | 0.997 | 0.010 | 0.024 |
| MR-PRESSO (outlier-corrected) | NA | NA | NA | NA | NA |
| Intrinsic Epigenetic Age Acceleration | Facial Ageing | IVW-FE | 1.001 | 0.999 | 1.003 | 0.001 | 0.485 |
| IVW-MRE | 1.001 | 0.999 | 1.003 | 0.001 | 0.485 |
| Weighted Median | 1.000 | 0.997 | 1.003 | 0.002 | 0.903 |
| MR-Egger | 1.002 | 0.996 | 1.008 | 0.003 | 0.531 |
| MR-PRESSO (outlier-corrected) | NA | NA | NA | NA | NA |
| Exposure | Meidator | Methods | Effect (OR) | 95% CI | | SE | P-Value |
| BMI (Body Mass Index) | Myocardial Infarction | IVW-FE | 1.469 | 1.305 | 1.653 | 0.060 | 1.759E-10 |
| IVW-MRE | 1.469 | 1.305 | 1.653 | 0.060 | 1.759E-10 |
| Weighted Median | 1.448 | 1.224 | 1.713 | 0.086 | 1.580E-05 |
| MR-Egger | 1.486 | 1.050 | 2.101 | 0.177 | 2.861E-02 |
| MR-PRESSO (outlier-corrected) | NA | NA | NA | NA | NA |
| BMI (Body Mass Index) | Primary Sclerosing Cholangitis | IVW-FE | 0.969 | 0.670 | 1.401 | 0.188 | 0.867 |
| IVW-MRE | 0.969 | 0.670 | 1.401 | 0.188 | 0.867 |
| Weighted Median | 1.159 | 0.693 | 1.939 | 0.262 | 0.573 |
| MR-Egger | 0.759 | 0.265 | 2.178 | 0.538 | 0.610 |
| MR-PRESSO (outlier-corrected) | NA | NA | NA | NA | NA |
| BMI (Body Mass Index) | Celiac Disease | IVW-FE | 0.669 | 0.436 | 1.029 | 0.219 | 0.067 |
| IVW-MRE | 0.669 | 0.436 | 1.029 | 0.219 | 0.067 |
| Weighted Median | 0.610 | 0.354 | 1.051 | 0.278 | 0.075 |
| MR-Egger | 0.665 | 0.227 | 1.945 | 0.547 | 0.480 |
| MR-PRESSO (outlier-corrected) | NA | NA | NA | NA | NA |
| BMI (Body Mass Index) | Ischemic Stroke | IVW-FE | 1.166 | 1.041 | 1.306 | 0.058 | 0.008 |
| IVW-MRE | 1.166 | 1.041 | 1.306 | 0.058 | 0.008 |
| Weighted Median | 1.240 | 1.077 | 1.427 | 0.072 | 0.003 |
| MR-Egger | 1.140 | 0.819 | 1.586 | 0.169 | 0.441 |
| MR-PRESSO (outlier-corrected) | 1.171 | 1.066 | 1.287 | 0.048 | 0.002 |
| MR-PRESSO Outlier Test removes outlier bias driven by rs2176598 and rs7903146 | | | | | |
| IVW-FE | 1.169 | 1.055 | 1.294 | 0.052 | 0.003 |
| IVW-MRE | 1.169 | 1.055 | 1.294 | 0.052 | 0.003 |
| Weighted Median | 1.242 | 1.085 | 1.421 | 0.069 | 0.002 |
| MR-Egger | 1.164 | 0.866 | 1.564 | 0.151 | 0.319 |
| MR-PRESSO (outlier-corrected) | NA | NA | NA | NA | NA |
| BMI (Body Mass Index) | Multiple Sclerosis | IVW-FE | 1.371 | 1.059 | 1.773 | 0.131 | 0.016 |
| IVW-MRE | 1.371 | 1.059 | 1.773 | 0.131 | 0.016 |
| Weighted Median | 1.256 | 0.877 | 1.799 | 0.183 | 0.214 |
| MR-Egger | 1.880 | 0.903 | 3.916 | 0.374 | 0.099 |
| MR-PRESSO (outlier-corrected) | NA | NA | NA | NA | NA |
| BMI (Female) | Age At Menarche (Female) | IVW-FE | 0.554 | 0.473 | 0.649 | 0.081 | 2.318E-13 |
| IVW-MRE | 0.554 | 0.473 | 0.649 | 0.081 | 2.318E-13 |
| Weighted Median | 0.576 | 0.517 | 0.642 | 0.055 | 1.321E-23 |
| MR-Egger | 0.443 | 0.292 | 0.673 | 0.213 | 5.683E-04 |
| MR-PRESSO (outlier-corrected) | 0.651 | 0.585 | 0.726 | 0.055 | 1.873E-07 |
| MR-PRESSO Outlier Test removes outlier bias driven by rs10938397, rs11165643, rs1121980, rs12446632, rs12529728, rs1516725, rs2303108, rs4929923, rs4981693, rs543874, rs6091540, rs6548237, rs663129, rs7138803, and rs745213 | | | | | |
| IVW-FE | 0.672 | 0.600 | 0.752 | 0.058 | 5.490E-12 |
| IVW-MRE | 0.672 | 0.600 | 0.752 | 0.058 | 5.490E-12 |
| Weighted Median | 0.771 | 0.681 | 0.872 | 0.063 | 3.808E-05 |
| MR-Egger | 0.653 | 0.401 | 1.064 | 0.249 | 0.105 |
| MR-PRESSO (outlier-corrected) | NA | NA | NA | NA | NA |
| BMI (Body Mass Index) | Cigarettes Per Day | IVW-FE | 1.301 | 1.199 | 1.412 | 0.042 | 2.637E-10 |
| IVW-MRE | 1.301 | 1.199 | 1.412 | 0.042 | 2.637E-10 |
| Weighted Median | 1.396 | 1.263 | 1.544 | 0.051 | 7.355E-11 |
| MR-Egger | 1.252 | 0.984 | 1.593 | 0.123 | 0.072 |
| MR-PRESSO (outlier-corrected) | 1.301 | 1.199 | 1.412 | 0.042 | 2.867E-08 |
| MR-PRESSO Outlier Test removes outlier bias driven by rs1558902 | | | | | |
| IVW-FE | 1.301 | 1.199 | 1.412 | 0.042 | 2.637E-10 |
| IVW-MRE | 1.301 | 1.199 | 1.412 | 0.042 | 2.637E-10 |
| Weighted Median | 1.396 | 1.272 | 1.533 | 0.048 | 2.148E-12 |
| MR-Egger | 1.252 | 0.984 | 1.593 | 0.123 | 0.072 |
| MR-PRESSO (outlier-corrected) | NA | NA | NA | NA | NA |
| BMI (Body Mass Index) | Urate Levels | IVW-FE | 1.378 | 1.267 | 1.498 | 0.043 | 6.484E-14 |
| IVW-MRE | 1.378 | 1.267 | 1.498 | 0.043 | 6.484E-14 |
| Weighted Median | 1.452 | 1.323 | 1.595 | 0.048 | 5.463E-15 |
| MR-Egger | 1.326 | 1.038 | 1.695 | 0.125 | 2.746E-02 |
| MR-PRESSO (outlier-corrected) | 1.385 | 1.296 | 1.480 | 0.034 | 4.209E-14 |
| MR-PRESSO Outlier Test removes outlier bias driven by rs11727676, rs13107325 | | | | | |
| IVW-FE | 1.412 | 1.311 | 1.522 | 0.038 | 1.288E-19 |
| IVW-MRE | 1.412 | 1.311 | 1.522 | 0.038 | 1.288E-19 |
| Weighted Median | 1.454 | 1.331 | 1.588 | 0.045 | 7.958E-17 |
| MR-Egger | 1.442 | 1.157 | 1.797 | 0.112 | 1.818E-03 |
| MR-PRESSO (outlier-corrected) | NA | NA | NA | NA | NA |
| BMI (Body Mass Index) | Receptor for advanced glycosylation end products levels | IVW | 0.895 | 0.804 | 0.996 | 0.055 | 0.043 |
| IVW-MRE | 0.895 | 0.804 | 0.996 | 0.055 | 0.043 |
| Weighted Median | 0.904 | 0.773 | 1.056 | 0.079 | 0.203 |
| MR-Egger | 0.990 | 0.722 | 1.359 | 0.161 | 0.952 |
| MR-PRESSO (outlier-corrected) | NA | NA | NA | NA | NA |
| BMI (Body Mass Index) | Sex Hormone-Binding Globulin (SHBG) Levels | IVW | 1.166 | 1.080 | 1.258 | 0.039 | 7.972E-05 |
| IVW-MRE | 1.166 | 1.080 | 1.258 | 0.039 | 7.972E-05 |
| Weighted Median | 1.133 | 1.082 | 1.187 | 0.024 | 1.342E-07 |
| MR-Egger | 1.316 | 1.062 | 1.630 | 0.109 | 1.583E-02 |
| MR-PRESSO (outlier-corrected) | 1.155 | 1.117 | 1.195 | 0.017 | 1.769E-09 |
| MR-PRESSO Outlier Test removes outlier bias driven by rs1000940, rs10132280, rs11727676, rs17024393, rs2112347, rs3736485, rs3849570, rs3888190, rs4889606, rs543874, rs6567160, rs7903146, and rs9400239 | | | | | |
| IVW | 1.167 | 1.126 | 1.210 | 0.019 | 7.141E-17 |
| IVW-MRE | 1.167 | 1.126 | 1.210 | 0.019 | 7.141E-17 |
| Weighted Median | 1.142 | 1.090 | 1.197 | 0.024 | 2.499E-08 |
| MR-Egger | 1.247 | 1.122 | 1.387 | 0.054 | 3.287E-04 |
| MR-PRESSO (outlier-corrected) | NA | NA | NA | NA | NA |
| BMI (Body Mass Index) | Coffee Intake | IVW | 1.133 | 1.098 | 1.169 | 0.016 | 4.542E-15 |
| IVW-MRE | 1.133 | 1.098 | 1.169 | 0.016 | 4.542E-15 |
| Weighted Median | 1.131 | 1.098 | 1.166 | 0.015 | 8.455E-16 |
| MR-Egger | 1.274 | 1.167 | 1.391 | 0.045 | 1.016E-06 |
| MR-PRESSO (outlier-corrected) | 1.123 | 1.094 | 1.153 | 0.014 | 6.298E-12 |
| MR-PRESSO Outlier Test removes outlier bias driven by rs13021737, rs1558902, rs2287019, rs4889606, rs6567160, rs6804842, rs7138803, and rs9400239 | | | | | |
| IVW | 1.123 | 1.094 | 1.153 | 0.014 | 1.546E-17 |
| IVW-MRE | 1.123 | 1.094 | 1.153 | 0.014 | 1.546E-17 |
| Weighted Median | 1.126 | 1.093 | 1.161 | 0.015 | 1.066E-14 |
| MR-Egger | 1.198 | 1.097 | 1.308 | 0.045 | 1.686E-04 |
| MR-PRESSO (outlier-corrected) | NA | NA | NA | NA | NA |
| BMI (Body Mass Index) | Melanoma Skin Cancer | IVW | 1.000 | 0.997 | 1.002 | 0.001 | 0.813 |
| IVW-MRE | 1.000 | 0.997 | 1.002 | 0.001 | 0.813 |
| Weighted Median | 1.002 | 0.998 | 1.005 | 0.002 | 0.403 |
| MR-Egger | 0.996 | 0.989 | 1.003 | 0.004 | 0.259 |
| MR-PRESSO (outlier-corrected) | NA | NA | NA | NA | NA |
| BMI (Body Mass Index) | Sicca Syndrome | IVW | 1.347 | 0.843 | 2.153 | 0.239 | 0.212 |
| IVW-MRE | 1.347 | 0.843 | 2.153 | 0.239 | 0.212 |
| Weighted Median | 1.342 | 0.724 | 2.487 | 0.315 | 0.351 |
| MR-Egger | 0.602 | 0.151 | 2.401 | 0.706 | 0.474 |
| MR-PRESSO (outlier-corrected) | 1.172 | 0.809 | 1.700 | 0.190 | 0.404 |
| MR-PRESSO Outlier Test removes outlier bias driven by rs205262 | | | | | |
| IVW | 1.215 | 0.805 | 1.834 | 0.210 | 0.354 |
| IVW-MRE | 1.215 | 0.810 | 1.823 | 0.207 | 0.347 |
| Weighted Median | 1.327 | 0.721 | 2.442 | 0.311 | 0.364 |
| MR-Egger | 0.684 | 0.203 | 2.304 | 0.620 | 0.542 |
| MR-PRESSO (outlier-corrected) | NA | NA | NA | NA | NA |
| BMI (Body Mass Index) | Telomere Length | IVW | 0.980 | 0.948 | 1.012 | 0.017 | 0.222 |
| IVW-MRE | 0.980 | 0.948 | 1.012 | 0.017 | 0.222 |
| Weighted Median | 0.987 | 0.953 | 1.022 | 0.018 | 0.448 |
| MR-Egger | 0.981 | 0.890 | 1.081 | 0.050 | 0.694 |
| MR-PRESSO (outlier-corrected) | 0.960 | 0.938 | 0.983 | 0.012 | 1.233E-03 |
| MR-PRESSO Outlier Test removes outlier bias driven by rs11057405, rs12986742, rs3888190, and rs7138803 | | | | | |
| IVW | 0.963 | 0.939 | 0.988 | 0.013 | 0.004 |
| IVW-MRE | 0.963 | 0.939 | 0.988 | 0.013 | 0.004 |
| Weighted Median | 0.973 | 0.940 | 1.008 | 0.018 | 0.124 |
| MR-Egger | 0.973 | 0.904 | 1.047 | 0.038 | 0.467 |
| MR-PRESSO (outlier-corrected) | NA | NA | NA | NA | NA |

**(4) Supplementary Table 4** Heterogeneity Test and Pleiotropy Test

|  | | Heterogeneity test | | | | | |  | Pleiotropy test | | | | |
| --- | --- | --- | --- | --- | --- | --- | --- | --- | --- | --- | --- | --- | --- |
| Cochran's *Q* Test | | |  | MR‐PRESSO global test | |  | MR‐Egger intercept test | |  | MR‐PRESSO distortion test | |
| Exposure | Outcome | Methods | Q | P-value |  | RSSobs | P-value |  | Intercept | P-value |  | Coefficient | P-value |
| BMI (Body Mass Index) | Facial Ageing | MR Egger | 208.751 | 1.004E-16 |  | 221.044 | <0.001 |  | 8.361E-04 | 0.283 |  | -14.346 | 0.273 |
| Inverse variance weighted | 212.452 | 4.982E-17 |  |  |  |
| MR-PRESSO Outlier Test removes outlier bias driven by rs13107325, rs17024393, rs2207139 and rs3101336 | | | | | | | | | | | |
| MR Egger | 94.948 | 0.005 |  | 98.443 | 0.006 |  | 1.996E-04 | 0.724 |  | NA | NA |
| Inverse variance weighted | 95.141 | 0.006 |  |  |  |
| BMI (Male) | Facial Ageing (Male) | MR Egger | 86.006 | 2.414E-08 |  | 95.854 | <0.001 |  | -1.580E-03 | 0.447 |  | -7.884331 | 0.761 |
| Inverse variance weighted | 87.974 | 2.215E-08 |  |  |  |
| MR-PRESSO Outlier Test removes outlier bias driven by rs13107325 and rs2206277 | | | | | | | | | | | |
| MR Egger | 40.018 | 0.021 |  | 48.809 | 0.034 |  | -0.002 | 0.166 |  | NA | NA |
| Inverse variance weighted | 43.424 | 0.013 |  |  |  |
| BMI (Female) | Facial Ageing (Female) | MR Egger | 98.272 | 2.095E-08 |  | 105.644 | <0.001 |  | 4.136E-05 | 0.975 |  | -22.756 | 0.474 |
| Inverse variance weighted | 98.275 | 3.691E-08 |  |  |  |
| MR-PRESSO Outlier Test removes outlier bias driven by rs16851483 and rs7531118 | | | | | | | | | | | |
| MR Egger | 68.262 | 1.286E-04 |  | 73.862 | <0.001 |  | 4.307E-05 | 0.970 |  | NA | NA |
| Inverse variance weighted | 68.265 | 1.967E-04 |  |  |  |
| BMI (Male, ＞50 years) | Facial Ageing (Male) | MR Egger | 75.092 | 9.150E-11 |  | 92.709 | <0.001 |  | 2.579E-04 | 0.967 |  | -4.643 | 0.906 |
| Inverse variance weighted | 75.103 | 2.266E-10 |  |  |  |
| MR-PRESSO Outlier Test removes null estimates driven by rs1222069 and rs13107325 | | | | | | | | | | | |
| MR Egger | 13.007 | 0.293 |  | 30.196 | 0.041 |  | -0.012 | 0.162 |  | NA | NA |
| Inverse variance weighted | 30.100 | 0.003 |  |  |  |
| BMI (Female, ＞50 years) | Facial Ageing (Female) | MR Egger | 30.550 | 0.010 |  | 54.597 | <0.001 |  | -0.004 | 0.034 |  | -2.346 | 0.978 |
| Inverse variance weighted | 41.646 | 4.455E-04 |  |  |  |
| Leave-one-out Analysis removes null estimates driven by rs990871 | | | | | | | | | | | |
| MR Egger | 17.976 | 0.208 |  | 35.512 | 0.022 |  | -0.003 | 0.064 |  | NA | NA |
| Inverse variance weighted | 23.182 | 0.080 |  |  |  |
| BMI (Male, ＜50 years) | Facial Ageing (Male) | MR Egger | 2.367 | 0.669 |  | 10.291 | 0.355 |  | -0.006 | 0.117 |  | NA | NA |
| Inverse variance weighted | 6.348 | 0.274 |  |  |  |
| BMI (Female, ＜50 years) | Facial Ageing (Female) | MR Egger | 50.828 | 8.812E-06 |  | 58.788 | <0.001 |  | -0.001 | 0.628 |  | -21.587 | 0.734 |
| Inverse variance weighted | 51.657 | 1.244E-05 |  |  |  |
| Waist-to-Hip Ratio (WHR) adjusted for Body Mass Index (BMI) | Facial Ageing | MR Egger | 144.324 | 1.512E-15 |  | 162.516 | <0.001 |  | -0.001 | 0.695 |  | -24.466 | 0.674 |
| Inverse variance weighted | 144.988 | 2.447E-15 |  |  |  |
| WHR adjusted for BMI (Male) | Facial Ageing (Male) | MR Egger | 19.022 | 2.705E-04 |  | 28.161 | 0.003 |  | 0.003 | 0.934 |  | -56.891 | 0.470 |
| Inverse variance weighted | 19.268 | 6.963E-04 |  |  |  |
| MR-PRESSO Outlier Test removes outlier bias driven by rs1106529 | | | | | | | | | | | |
| MR Egger | 0.886 | 0.642 |  | 3.573 | 0.740 |  | -0.024 | 0.378 |  | NA | NA |
| Inverse variance weighted | 2.149 | 0.542 |  |  |  |
| WHR adjusted for BMI (Female) | Facial Ageing (Female) | MR Egger | 29.791 | 0.425 |  | 36.916 | 0.356 |  | -0.010 | 0.857 |  | NA | NA |
| Inverse variance weighted | 30.362 | 0.447 |  |  |  |
| WHR adjusted for BMI (Male, ＞50 years) | Facial Ageing (Male) | MR Egger | 20.623 | 0.014 |  | 38.488 | 0.005 |  | 0.002 | 0.688 |  | -287.618 | 0.145 |
| Inverse variance weighted | 21.017 | 0.021 |  |  |  |
| Leave-one-out Analysis removes null estimates driven by rs8043049 | | | | | | | | | | | |
| MR Egger | 7.443 | 0.490 |  | 27.176 | 0.053 |  | -0.002 | 0.639 |  | NA | NA |
| Inverse variance weighted | 7.681 | 0.567 |  |  |  |
| WHR adjusted for BMI (Female, ＞50 years) | Facial Ageing (Female) | MR Egger | 26.712 | 0.005 |  | 37.883 | 0.004 |  | 0.001 | 0.766 |  | -7.510 | 0.915 |
| Inverse variance weighted | 26.939 | 0.008 |  |  |  |
| WHR adjusted for BMI (Male, ＜50 years) | Facial Ageing (Male) | MR Egger | 14.922 | 0.061 |  | 20.883 | 0.066 |  | 0.005 | 0.344 |  | NA | NA |
| Inverse variance weighted | 16.812 | 0.052 |  |  |  |
| WHR adjusted for BMI (Female, ＜50 years) | Facial Ageing (Female) | MR Egger | 19.427 | 0.013 |  | 26.461 | 0.020 |  | 0.004 | 0.471 |  | NA | NA |
| Inverse variance weighted | 20.817 | 0.013 |  |  |  |
|  |  | Heterogeneity test | | | | | |  | Pleiotropy test | | | | |
|  |  | Cochran's *Q* Test | | |  | MR‐PRESSO global test | |  | MR‐Egger intercept test | |  | MR‐PRESSO distortion test | |
| Mediator | Outcome | Methods | Q | P-value |  | RSSobs | P-value |  | Intercept | P-value |  | Coefficient | P-value |
| Coronary Artery Disease | Facial Ageing | MR Egger | 143.986 | 7.351E-09 |  | 174.598 | <0.001 |  | -0.001 | 0.062 |  | 56.118 | 0.798 |
| Inverse variance weighted | 155.582 | 3.287E-10 |  |  |  |
| Myocardial Infarction | Facial Ageing | MR Egger | 38.701 | 0.021 |  | 50.329 | 0.005 |  | -0.001 | 0.088 |  | 240.764 | 0.077 |
| Inverse variance weighted | 44.027 | 0.008 |  |  |  |
| Leave-one-out Analysis removes null estimates driven by rs72934535 | | | | | | | | | | | |
| MR Egger | 32.405 | 0.071 |  | 33.679 | 0.131 |  | -0.002 | 0.050 |  | NA | NA |
| Inverse variance weighted | 38.711 | 0.021 |  |  |  |
| Hypertension | Facial Ageing | MR Egger | 144.346 | 2.151E-10 |  | 168.364 | <0.001 |  | 0.002 | 0.063 |  | 674.641 | 0.072 |
| Inverse variance weighted | 157.884 | 4.074E-12 |  |  |  |
| Systolic Blood Pressure | Facial Ageing | MR Egger | 1396.168 | 6.185E-99 |  | 1431.458 | <0.001 |  | 1.135E-04 | 0.664 |  | 200.070 | 0.122 |
| Inverse variance weighted | 1396.761 | 8.971E-99 |  |  |  |
| Diastolic Blood Pressure | Facial Ageing | MR Egger | 1264.574 | 2.198E-79 |  | 1308.904 | <0.001 |  | 3.395E-04 | 0.157 |  | 285.220 | 0.155 |
| Inverse variance weighted | 1270.260 | 5.847E-80 |  |  |  |
| Ankylosing Spondylitis | Facial Ageing | MR Egger | 6.090 | 0.193 |  | 7.011 | 0.521 |  | 2.175E-04 | 0.836 |  | NA | NA |
| Inverse variance weighted | 6.164 | 0.291 |  |  |  |
| Allergic Disease (Asthma, Hay Fever or Eczema) | Facial Ageing | MR Egger | 163.331 | 8.145E-10 |  | 195.607 | <0.001 |  | 0.001 | 0.350 |  | 48.808 | 0.656 |
| Inverse variance weighted | 165.461 | 6.752E-10 |  |  |  |
| Systemic Lupus Erythematosus | Facial Ageing | MR Egger | 53.260 | 0.064 |  | 72.954 | 0.005 |  | -0.001 | 0.081 |  | 289.594 | 0.110 |
| Inverse variance weighted | 57.656 | 0.035 |  |  |  |
| MR-PRESSO Outlier Test removes outlier bias driven by rs389884 and rs13019891 | | | | | | | | | | | |
| MR Egger | 37.550 | 0.444 |  | 49.785 | 0.246 |  | -0.001 | 0.219 |  | NA | NA |
| Inverse variance weighted | 39.134 | 0.419 |  |  |  |
| Primary Sclerosing Cholangitis | Facial Ageing | MR Egger | 27.364 | 0.038 |  | 33.845 | 0.060 |  | 3.153E-04 | 0.658 |  | NA | NA |
| Inverse variance weighted | 27.712 | 0.048 |  |  |  |
| Celiac Disease | Facial Ageing | MR Egger | 15.239 | 0.293 |  | 19.113 | 0.320 |  | -0.001 | 0.272 |  | NA | NA |
| Inverse variance weighted | 16.783 | 0.268 |  |  |  |
| Alzheimer's Disease | Facial Ageing | MR Egger | 47.715 | 5.265E-05 |  | 56.084 | <0.001 |  | -0.001 | 0.334 |  | -59.12692 | 0.826 |
| Inverse variance weighted | 50.671 | 3.321E-05 |  |  |  |
| Schizophrenia | Facial Ageing | MR Egger | 522.122 | 3.436E-43 |  | 546.816 | <0.001 |  | 2.219E-04 | 0.747 |  | 56.388 | 0.518 |
| Inverse variance weighted | 522.489 | 5.679E-43 |  |  |  |
| Ischemic Stroke | Facial Ageing | MR Egger | 30.342 | 0.016 |  | 34.281 | 0.03 |  | -0.001 | 0.599 |  | NA | NA |
| Inverse variance weighted | 30.888 | 0.021 |  |  |  |
| Multiple Sclerosis | Facial Ageing | MR Egger | 41.818 | 0.014 |  | 44.786 | 0.025 |  | -2.373E-04 | 0.685 |  | NA | NA |
| Inverse variance weighted | 42.111 | 0.017 |  |  |  |
| Hypothyroidism | Facial Ageing | MR Egger | 40.992 | 0.023 |  | 45.248 | 0.068 |  | -2.003E-04 | 0.792 |  | NA | NA |
| Inverse variance weighted | 41.109 | 0.030 |  |  |  |
| T2D (Type 2 Diabetes) | Facial Ageing | MR Egger | 516.893 | 9.007E-46 |  | 747.961 | <0.001 |  | 0.001 | 0.114 |  | -25.732 | 0.711 |
| Inverse variance weighted | 526.498 | 4.985E-47 |  |  |  |
| Homeostasis Model Assessment of Insulin Resistance (HOMA-IR) | Facial Ageing | MR Egger | 13.180 | 0.040 |  | 17.404 | 0.082 |  | 0.001 | 0.685 |  | NA | NA |
| Inverse variance weighted | 13.579 | 0.059 |  |  |  |
| Sex Hormone-Binding Globulin (SHBG) Levels | Facial Ageing | MR Egger | 1075.096 | 1.188E-70 |  | 1120.849 | <0.001 |  | 4.029E-04 | 0.023 |  | -10.772 | 0.862 |
| Inverse variance weighted | 1090.392 | 1.280E-72 |  |  |  |
| MR-PRESSO Outlier Test removes outlier bias driven by rs11010551, rs11600570, rs11600570, rs138840, rrs1421085, rs1529868, rs17036326, rs2293579,  rs4246215, rs543874, rs59774409, rs6479896, rs72787511, and rs72787511 | | | | | | | | | | | |
| MR Egger | 717.025 | 5.394E-27 |  | 744.018 | <0.001 |  | 1.491E-04 | 0.327 |  | NA | NA |
| Inverse variance weighted | 718.984 | 4.670E-27 |  |  |  |
| Triglycerides Level | Facial Ageing | MR Egger | 146.186 | 4.242E-19 |  | 152.122 | <0.001 |  | 1.267E-04 | 0.907 |  | -57.193 | 0.201 |
| Inverse variance weighted | 146.268 | 1.009E-18 |  |  |  |
| Total cholesterol Level | Facial Ageing | MR Egger | 257.694 | 1.567E-19 |  | 264.231 | <0.001 |  | -7.996E-05 | 0.840 |  | 207.73 | 0.256 |
| Inverse variance weighted | 257.821 | 2.652E-19 |  |  |  |
[truncated: 30,199 more chars]
